# Supplementary material for: Plastome Evolution in Saxifragaceae and Multiple Plastid Capture Events Involving Heuchera and Tiarella
Source: Front Plant Sci. 2020 Apr 24;11:361. doi: 10.3389/fpls.2020.00361 (PMC7193090; doi:10.3389/fpls.2020.00361)
Supplement: TABLE S3 — The detail information of polymorphic nSSRs identified and primer pairs designed for each detected loci within Tiarella. [file Table_3.XLSX]

## Sheet: Sheet1
SSRID	Type		Tiarella trifoliata	Tiarella polyphylla-QHXH	Tiarella polyphylla-JXTM	Tiarella cordifolia-USAA	Tiarella cordifolia-TCUSLF	Std_dev	MissingRate	Transferability (Similarity)	Upstream_100bp	Downstream_100bp
CPSSR_1	AAAAG	4	5|FCHL5JJBBXX_L2_wHAXPI059581-29_1_(paired)_contig_234026:112-336|+	5|LP150221_R1_(paired)_trimmed_(paired)_contig_95311:1096-1120|-	N/A	N/A	3|TCunknown-1_(paired)_contig_73079:363-377|+	0.94	0.4	0.93	AGAAGAGTTTTTAACTTACTCCTAACCTCTTCACCAAAACACTCCAAAATAGGATAAGTCCGAAATTGTGGGAATTATTTTGACTGTCAACTCCAATCCA	ATTAGCAGATGATTAGAGCGAAAAGTTCCCCTTTGCTCTGCCCGTTACCAAACCGACAAACTGAACAAGTGTCACGGGAGACTCACACGTAATTCTCAAC
CPSSR_2	AAAAG	5	5|FCHL5JJBBXX_L2_wHAXPI059581-29_1_(paired)_contig_26977:258-482|+	5|LP150221_R1_(paired)_trimmed_(paired)_contig_82158:497-521|+	N/A	N/A	3|TCunknown-1_(paired)_contig_4888:1322-1336|-	0.94	0.4	0.97	ATCAGAAATGTATATTTTTAAGTTGTACATACAGCAAAACTTTTTAAGGTTCGTAGGTAACAATTCTCTTGCCTAAGTAAGCTTGCAATCCTATCCGGAA	TAAGCTTGTGATCCGCCAAACCTTGAGATGGAGAACAGAGAATTAGTTTTACACTTTAATTCACTCGTGCTATTCAGTCTGAAAGGGAGCTTTAGTAAGT
CPSSR_3	AAAAG	6	6|FCHL5JJBBXX_L2_wHAXPI059581-29_1_(paired)_contig_27101:1501-1730|+	N/A	4|LP161083-1_R1_(paired)_trimmed_(paired)_contig_105588:477-496|+	6|FCHL5H3BBXX_L3_wHAXPI062220-17_1_(paired)_contig_165096:801-830|+	6|TCunknown-1_(paired)_contig_141945:1101-1130|-	0.87	0.2	0.96	ATTCTTGCAAAACCCCAGTTGGCATATACAGCAACCAGAGTTGCTACCTGTAGACAACAGAATTTGTTTACTCAATCATAGAACACTATTTTCCTACCGA	AGAAGAGGGGAAACATAGCACACTATCCTTGCTTTCCAAACTCTTACATTTGCCCTAAACTAAACATAGGAGAATGTGTACCATAGTATGCCAAATATAG
CPSSR_4	AAAAG	7	6|FCHL5JJBBXX_L2_wHAXPI059581-29_1_(paired)_contig_39867:160-389|+	6|LP150221_R1_(paired)_trimmed_(paired)_contig_26758:1607-1636|-	N/A	3|FCHL5H3BBXX_L3_wHAXPI062220-17_1_(paired)_contig_313243:249-263|+	N/A	1.41	0.4	0.95	TTTTTCTTTTTTTATGTCAAAGCTACACTAACTTAGACCATGCCTAGAAAAAAAAAGTAGAGCTGAATTTTTGAAGCACCATTAGGGAAGGAAAGAAAGT	AAATGGAAAGCATAGCTTACCTTACCTTCCTAGAGCATTATTCAACGTTTTCAATTCCTTTCCAACACTTCTCTAATATCAAATGGGGCTAATGATTTAA
CPSSR_5	AAAAT	9	5|FCHL5JJBBXX_L2_wHAXPI059581-29_1_(paired)_contig_79453:548-772|+	4|LP150221_R1_(paired)_trimmed_(paired)_contig_83802:637-656|-	4|LP161083-1_R1_(paired)_trimmed_(paired)_contig_7860:217-236|+	N/A	N/A	0.47	0.4	0.99	TCATGGGATATAATCGATCTTTAAGGCCAAACTTGCTATAATATGATTGCTCAAGATTAATAAAAAGTTTATTCTAAAAAGTCTGAATATCTCGTCATAA	ATGTTGATAAGACTTGTTTGGTTGTCTCATGAGAATTAGACTTTTATTTTTTGTTATACAAGTGTAGTCTTGTAAATTAAGGAACTAAGGATGATAAAGG
CPSSR_6	AAAC	10	5|FCHL5JJBBXX_L2_wHAXPI059581-29_1_(paired)_contig_191104:512-731|+	4|LP150221_R1_(paired)_trimmed_(paired)_contig_21900:852-867|-	N/A	4|FCHL5H3BBXX_L3_wHAXPI062220-17_1_(paired)_contig_330822:125-140|-	N/A	0.47	0.4	0.99	TATTACCCTTCCGTCCATTTCAGTACCAATTTCACTAGCGGTGTCAAAACAGTTAGTCTTTTGAGACAACCCCCCCTCTCTCTCTAACTTATATACTCCA	AACCTATACTTTGTCTCACACATTTGCATTGCTAGCCAAAATGGTCATCACCTCGAGTACCTATCTATCTCCTCTCATTCTCCCAGCAACAAGAAAGTAA
CPSSR_7	AAAC	11	5|FCHL5JJBBXX_L2_wHAXPI059581-29_1_(paired)_contig_82724:25-244|+	5|LP150221_R1_(paired)_trimmed_(paired)_contig_174705:1576-1595|-	6|LP161083-1_R1_(paired)_trimmed_(paired)_contig_45513:3181-3204|-	4|FCHL5H3BBXX_L3_wHAXPI062220-17_1_(paired)_contig_97238:191-206|-	N/A	0.71	0.2	0.98	AAAATTTCAATAATTCTTAAATTACCCCAATTTTCTCTAATCACAGTATAATATCCTTAGCATAAGCGCACAATTTCTAAGGAAAAAAAAGAGAAGAAAA	ATAAGCCCACAATCCTTGACCATTTACGAGTAATATATTGACACGTGGCTGATTCGTGTACTTGGAAAATGGACAACCAATATCTGGCCTTGTTAATGTG
CPSSR_8	AAACA	12	5|FCHL5JJBBXX_L2_wHAXPI059581-29_1_(paired)_contig_131626:122-346|+	2|LP150221_R1_(paired)_trimmed_(paired)_contig_3420:829-838|-	2|LP161083-1_R1_(paired)_trimmed_(paired)_contig_91762:135-144|+	N/A	5|TCunknown-1_(paired)_contig_42526:753-777|+	1.5	0.2	0.94	AATGATAAGTGTGTTCCACTGTTCCTCTTTATGTCTTAGGTCTTGGCCACGTCCAACCCCGACAAGCTCAGAGGTGCAAACAAATTATTAAGCTGAGTAG	AAAAGAGGTGCAGAGTTTACCCAGGAGTCCAGGACCATGCATATATGCTACGTTGAGCCTTAGCATTCAAGTGGAGGCGTGCTTAGAAACGTCTTAGTTA
CPSSR_9	AAAG	13	5|FCHL5JJBBXX_L2_wHAXPI059581-29_1_(paired)_contig_139154:164-383|+	4|LP150221_R1_(paired)_trimmed_(paired)_contig_47416:685-700|+	5|LP161083-1_R1_(paired)_trimmed_(paired)_contig_58072:594-613|-	N/A	N/A	0.47	0.4	0.98	GCTGAAGAAAGTTTCTGTAACAAGAAAGATGGAAAATTTAAAGATTCAGAAGTAATCAAGGTTTGTTGATGTTCCATTAATGGTAAAGAAGTTTCATTAA	AAAACCCAAAAGTAGCACATGCTGAGATACGGTGTGCATATATGATGATCAAGACAAATCAATTACAATTATGGAGAAAATTTCCATAGAGGTTTCTTCT
CPSSR_10	AAAG	14	5|FCHL5JJBBXX_L2_wHAXPI059581-29_1_(paired)_contig_286522:64-283|+	3|LP150221_R1_(paired)_trimmed_(paired)_contig_49154:871-882|+	N/A	3|FCHL5H3BBXX_L3_wHAXPI062220-17_1_(paired)_contig_34483:1395-1406|+	N/A	0.94	0.4	0.99	ATACACCACCTTTAAAGAGACAAGTTTTCAACTAAAACACTAAGAATTCGCTTTTCAAAATGGAGTTGATGGAGTAGTAGTACAATATTTCCAAGCTTTA	AAAAGAATAGATTAAGACAATATAATATTCCAAATGATCACATGAATTCATCTGCCTCACTATGCAGATATGTTGTTTACATTTCATTTTAAAATACCAA
CPSSR_11	AAAT	17	5|FCHL5JJBBXX_L2_wHAXPI059581-29_1_(paired)_contig_132570:339-558|+	4|LP150221_R1_(paired)_trimmed_(paired)_contig_99902:1506-1521|-	4|LP161083-1_R1_(paired)_trimmed_(paired)_contig_35147:717-732|+	N/A	N/A	0.47	0.4	0.96	CAAGTAGTTACTACATCGCACCCAAGATGGGTACTAATTAAAAAATGATACTGTATAAATTCAGTGTAGCTTAATTATTTAATATGTTCTATGATTACCA	AAAATATGTTATGAAATTAACCACAATTAATACAAAGTAATGTAATACAGTATAAAATCTTAAAATCAAATGAACATCATTAACACACGTGAGACCAAGA
CPSSR_12	AAAT	18	5|FCHL5JJBBXX_L2_wHAXPI059581-29_1_(paired)_contig_26966:575-794|+	5|LP150221_R1_(paired)_trimmed_(paired)_contig_157721:133-152|+	4|LP161083-1_R1_(paired)_trimmed_(paired)_contig_17454:454-469|-	N/A	4|TCunknown-1_(paired)_contig_2332:473-488|-	0.5	0.2	0.98	CGAAACGGCGAAATAATCAAGACACATCGCTACGCCATGTGATCCCGTGTTTTTAGCCGAATTATGATGGCTAGGCCTTCGTTTTAGCAGTTTTGTATTA	AAAAATTGCTTCTTTTAATCGGATCGGATTTATGAGTATGTGTGTATCGTATATGTATGTGTATACATAGTACGCGTGATGTTTCATTATGATATAATTC
CPSSR_13	AAAT	19	6|FCHL5JJBBXX_L2_wHAXPI059581-29_1_(paired)_contig_133039:1840-2063|+	5|LP150221_R1_(paired)_trimmed_(paired)_contig_130633:1208-1227|-	5|LP161083-1_R1_(paired)_trimmed_(paired)_contig_229602:494-513|-	N/A	N/A	0.47	0.4	0.99	CCCGGAGACTGTTTGAGGGCTACTAGCGATTGGTTTAGTCGTTGCAGAGACATGCTCATGAGCTCATCACAATAGTCTGCATGCAAATACGCATATGTAC	AAAAAGACAGACTAATTTTTTTTTATTTTAGCCCTTTAGAAAAGTGCAAAATGAGGACTATGCTGGGGTATTACCAAGTGTAGAATCATGGACATGTCTA
CPSSR_14	AAC	20	10|FCHL5JJBBXX_L2_wHAXPI059581-29_1_(paired)_contig_21886:459-688|+	7|LP150221_R1_(paired)_trimmed_(paired)_contig_123052:1681-1701|+	N/A	N/A	10|TCunknown-1_(paired)_contig_10677:1683-1712|-	1.41	0.4	0.95	GACCGACCAAAGCATTTATAAATATGACAACATACGTGTAGAGGAGTAGAACTGACTGTGAGCAAGAAGGGTAGGGGCGGCAGGGGAAGGATAGGGGTAT	AAAGACACCAGAAGGTTCGAACTGCTCATCTCGAAGATCAAGAAAAAAATGGCACACTTTCTCGAGGGTCTATGATGATGATAGAACATTGTAATGAAAA
CPSSR_15	AAC	21	10|FCHL5JJBBXX_L2_wHAXPI059581-29_1_(paired)_contig_98660:205-434|+	N/A	8|LP161083-1_R1_(paired)_trimmed_(paired)_contig_28111:1445-1468|+	8|FCHL5H3BBXX_L3_wHAXPI062220-17_1_(paired)_contig_244901:146-169|-	N/A	0.94	0.4	1	CACAGGCCAAAGGATGTTTTATCCCTCCCAATATCATCAAAATGAAAAACATCGGCATCATCTCCAGCGAGTTCTGATGCCCTCTCTATACCCAATCACA	AATCATTTCCGATTTCCGCATTTCATAGATAAAAATTGAATCAAAGACACCACAAATTAGGTATGATTAAATTAAGCAAACCTGAACACAGTTGAAGAGC
CPSSR_16	AAC	22	5|FCHL5JJBBXX_L2_wHAXPI059581-29_1_(paired)_contig_149055:56-270|+	N/A	4|LP161083-1_R1_(paired)_trimmed_(paired)_contig_216025:368-379|+	4|FCHL5H3BBXX_L3_wHAXPI062220-17_1_(paired)_contig_138117:263-274|-	N/A	0.47	0.4	0.99	TCTCATTGCCATTCTCCAATCACTACAAAGTTGAGTGCTTTCTGATTTGTCATATTCACTATCTCCATAGCTTTACACCAGGCCACTTCCAAATAGGCCA	ATATCACTCTCATCAGCCTCAGGCCAAACCAGAGGAGTGAACAACCGGCGAAGAAACTAATCAAAATGCAGACTCTCTCACCGTTCTCGACCCGACTTTT
CPSSR_17	AAC	24	5|FCHL5JJBBXX_L2_wHAXPI059581-29_1_(paired)_contig_177117:177-391|+	N/A	5|LP161083-1_R1_(paired)_trimmed_(paired)_contig_209424:544-558|-	6|FCHL5H3BBXX_L3_wHAXPI062220-17_1_(paired)_contig_132180:574-591|-	6|TCunknown-1_(paired)_contig_91764:162-179|+	0.5	0.2	1	GGTCAAGTCTCTACTACGTTTCAAGTCTGTTTCAAAAGAATGGCGTAGCTTAATCTCCGAACCTCAATTCATCAAACTTCACTTGAACCAATCTACTCAG	AAAAGACTCGTCGTTTTTGAATATGCTAGCTCTTGTCTATGGTCCATTGATTGCAAATTATCCTATCATAATGAGCATGATAAAATTGGATTGACGATGC
CPSSR_18	AAC	26	5|FCHL5JJBBXX_L2_wHAXPI059581-29_1_(paired)_contig_237347:854-1068|+	6|LP150221_R1_(paired)_trimmed_(paired)_contig_54176:3538-3555|+	N/A	N/A	5|TCunknown-1_(paired)_contig_63967:876-890|+	0.47	0.4	0.97	ATATTTTTCAGCTGTTAGTTTGTTACCTTTAGATGCAAGTAGTTGTTCTTGAATTATAGAGGTTCCTCTGTAGATGGCTCGTTTTCTTTGCCATGTTTGT	AAAAAATAAAAAGTGACCCAAATGAATTCAAGACCAACACCCACCTACTTGCATCTTACAGCTTACGTTAGCCTAAGACTAAAGGAATTTTAACAAGCAG
CPSSR_19	AAC	27	5|FCHL5JJBBXX_L2_wHAXPI059581-29_1_(paired)_contig_251118:260-474|+	4|LP150221_R1_(paired)_trimmed_(paired)_contig_62620:378-389|-	N/A	4|FCHL5H3BBXX_L3_wHAXPI062220-17_1_(paired)_contig_852:797-808|-	4|TCunknown-1_(paired)_contig_10525:3936-3947|-	0.43	0.2	0.97	TCCCTGATACATCTCCTTCCACATATTTACAAACTCAAGAGTCAAGACCCCTCTCTCTGTTACTTGCACAACAACTCAACCCCAACTGTACAAAAACCAG	AAGAACAAACACTTCAACATCTCTCCCAGTTTCCCGCTAAAAAATGGCGGCGCCGACATTGGAGCCGCCGTGTGCGAAGTACTACTACAACCCTTCCGTT
CPSSR_20	AAC	28	5|FCHL5JJBBXX_L2_wHAXPI059581-29_1_(paired)_contig_301292:115-329|+	5|LP150221_R1_(paired)_trimmed_(paired)_contig_143148:1935-1949|+	5|LP161083-1_R1_(paired)_trimmed_(paired)_contig_89698:585-599|+	N/A	7|TCunknown-1_(paired)_contig_53695:521-541|-	0.87	0.2	1	ACGCGGCGATGGGCTTGTTACTATCCCAAATCCCGATCGAACAGTATTCAAAGCCCGTAATCCACCCAAAATAAGCTATCCACACTTGGAGTACTCATCA	AATCATGATGGCCATGCATTATTCAGCGTACGAGGAATAATGAGCTCTACTTCCTACCAGCCAAGAAATAACATTCACTTGGTTCATTTGTCTCCACAAT
CPSSR_21	AAC	29	5|FCHL5JJBBXX_L2_wHAXPI059581-29_1_(paired)_contig_35937:4622-4836|+	8|LP150221_R1_(paired)_trimmed_(paired)_contig_184289:736-759|-	8|LP161083-1_R1_(paired)_trimmed_(paired)_contig_44468:492-515|+	3|FCHL5H3BBXX_L3_wHAXPI062220-17_1_(paired)_contig_327672:295-303|+	N/A	2.12	0.2	0.97	TGCCAGTTGGATCTTTCTCCTCAAAATCAACCTCCTCAGTCCCAACCATCCGATTCAAAGCTTTCATCACCGAATCCATCGCGAAAACGTCAAGAACAAG	ACGAGACAATGAAAATCCAACGAACAATCAATCTAGCAAGAAGAAGCAGCGAAGAACTCGGAATCGGTCAAAGAGACTCGATTTCGAATCCGATTGGAAT
CPSSR_22	AAC	30	5|FCHL5JJBBXX_L2_wHAXPI059581-29_1_(paired)_contig_38888:378-592|+	7|LP150221_R1_(paired)_trimmed_(paired)_contig_95111:1024-1044|-	6|LP161083-1_R1_(paired)_trimmed_(paired)_contig_1955:1517-1534|-	5|FCHL5H3BBXX_L3_wHAXPI062220-17_1_(paired)_contig_174735:196-210|-	N/A	0.83	0.2	0.99	GAACTTACCAGGAGTGTGCAAGTTAAACCAGCAGCCAAGCATATGGCAAAACCATAAAACCTCTGTTCAACATAGAGATTATACAATCAATGTCATCAAG	GATCTGAAAGAATATAGATCTAATGTGACATATAAAAGATTAAATAGATAGATTCCGACAAATCTGCTGTTTGGTTGCCAAGAAAATGTGGGGAAAAAAT
CPSSR_23	AAC	32	5|FCHL5JJBBXX_L2_wHAXPI059581-29_1_(paired)_contig_53237:327-541|+	N/A	4|LP161083-1_R1_(paired)_trimmed_(paired)_contig_96825:905-916|+	5|FCHL5H3BBXX_L3_wHAXPI062220-17_1_(paired)_contig_19955:339-353|+	N/A	0.47	0.4	1	GAACAATCGGCCGAGCATCCGAAAACTTCACGACGTCTGGTTTCCAGGAATTGCTTCCGTTTTCAACTTCATGTGTTGTAACTATAGTCGATTCCTGTGA	ATCTGATTTTGTTTCTTGCTTTGGTTGTTGTTCTGGGAAAATATGCCGCAAATTTTGGAAGAGTGAGAACAAGGGGTTTGGGTGATTTTGCTTTGCTTGT
CPSSR_24	AAC	33	5|FCHL5JJBBXX_L2_wHAXPI059581-29_1_(paired)_contig_60316:65-279|+	N/A	5|LP161083-1_R1_(paired)_trimmed_(paired)_contig_36282:991-1005|+	N/A	6|TCunknown-1_(paired)_contig_45929:363-380|-	0.47	0.4	0.99	GAAGAATTGGGTTGAACATGGAGTTGAATGAGATGTTGGAAGTGAGAGTAATCTTTGAACCACTCGTAATGTTCTTCATTAGAGAATCGCTTGTCCCTGA	GACATTGCAAAGCAAGAAGAGTAAATAATGATAATCGTGAGGGGTAAATGCGGGAAGAAGATAAAAAGAAGAGTTGGATTACCAGTAATGAGGGTCAAGG
CPSSR_25	AAC	35	6|FCHL5JJBBXX_L2_wHAXPI059581-29_1_(paired)_contig_112952:316-533|+	8|LP150221_R1_(paired)_trimmed_(paired)_contig_8601:1316-1339|+	N/A	5|FCHL5H3BBXX_L3_wHAXPI062220-17_1_(paired)_contig_97004:147-161|+	6|TCunknown-1_(paired)_contig_155530:479-496|-	1.09	0.2	1	ATCAAGCAAATATATGAAAGAGGAAATAAACAAGTTAAGAATTGCTGATTCAAACCTTAATCTTCAAGAAGATCCCAACAGATTTTGTATGTCTTTCTGT	AAAGTTAAAGAAATTAATAATCAGCAACAAGCCATACCCTTTTCAGATACAACATCAATTATGAAAAAAGAGAACACAGCGCGAACCTCAATACTAAGAG
CPSSR_26	AAC	36	6|FCHL5JJBBXX_L2_wHAXPI059581-29_1_(paired)_contig_126769:316-533|+	5|LP150221_R1_(paired)_trimmed_(paired)_contig_83782:596-610|-	4|LP161083-1_R1_(paired)_trimmed_(paired)_contig_51006:340-351|+	6|FCHL5H3BBXX_L3_wHAXPI062220-17_1_(paired)_contig_61066:410-427|+	N/A	0.83	0.2	0.99	CAACAGAAACAACCTTAACACAACAAACCCAATCCAATTCAACTCCAACAACAATCCTCATCAACACCCACTTCCTTGTTTCTCCATAAACCCATCCTCA	CCACCATTGGTGGTGGTCGGATCAGCCAATGCAGACATCTACGTCGAAATCGACAGACTCCCTAAAGAGGGAGAAACCATCTCCGCAAATTCCGGCCAGA
CPSSR_27	AAC	37	6|FCHL5JJBBXX_L2_wHAXPI059581-29_1_(paired)_contig_128978:109-326|+	N/A	5|LP161083-1_R1_(paired)_trimmed_(paired)_contig_132318:280-294|-	N/A	4|TCunknown-1_(paired)_contig_75227:1201-1212|-	0.82	0.4	1	AAGTAAGCTCAAGATTTCTTTCTCCAAGTTCAACATCTTCACACGATAGCGGTATCCCTTCTCCCAATCAAGCTCTCTCTCCCATTCGCCGCAAAAATGG	AAAAACTATCGATACTCGAAAGCATAAAAGCCTAGATGATTCGGGTCATATTCGAGGACTCTGGCCTTCATCGGGGATTACTACTAGTACTAATGCATCG
CPSSR_28	AAC	38	6|FCHL5JJBBXX_L2_wHAXPI059581-29_1_(paired)_contig_144311:99-316|+	6|LP150221_R1_(paired)_trimmed_(paired)_contig_71140:388-405|-	N/A	7|FCHL5H3BBXX_L3_wHAXPI062220-17_1_(paired)_contig_163575:698-718|-	N/A	0.47	0.4	0.98	ACTATTACTTACTACCCATGCGCCATAATATCACTTAATGTATATCTCACAAAGTTAAGACATTTCTTATCGCAAATAAAGACTTGACCTCCAATGCATT	CCAAATACGAGAACCATACATAGCTAGAATAATAGCACAAAACAATCAAGACATGTTTGAATAGCAATAGTTGCTTAGTAAGATTGAGAATGATTCAAGA
CPSSR_29	AAC	40	6|FCHL5JJBBXX_L2_wHAXPI059581-29_1_(paired)_contig_21548:422-639|+	5|LP150221_R1_(paired)_trimmed_(paired)_contig_79555:1950-1964|+	6|LP161083-1_R1_(paired)_trimmed_(paired)_contig_133828:463-480|-	N/A	N/A	0.47	0.4	0.97	CATGTCCACAGGAATTTTTTTCCCCAATTGATTTGGAAAATAATGGTAAAAAATAAAATAAAATCGGATATCGTATCATATCAGCTCAACTAAGATATTG	AATGCCTCTTGCCTGTGGCATATCAATAAGAAAGGAATTGGGAATGTATTGTGGTGAATTTTTGCAGGTTTTGATGTGGTATATAAATGAGAAGAGTTTC
CPSSR_30	AAC	41	6|FCHL5JJBBXX_L2_wHAXPI059581-29_1_(paired)_contig_264879:54-271|+	6|LP150221_R1_(paired)_trimmed_(paired)_contig_26863:1448-1465|+	6|LP161083-1_R1_(paired)_trimmed_(paired)_contig_45648:963-980|+	4|FCHL5H3BBXX_L3_wHAXPI062220-17_1_(paired)_contig_299111:163-174|-	4|TCunknown-1_(paired)_contig_46051:494-505|-	0.98	0	0.95	CTTTAATAGCATAACGTTTCATAGAGGACAAAGATTTGCAGACACAAGAACCAACCATTATGCTCTTTGTTTGGCTGCCGAGAAACTGAAAGGAAAATGA	AAAGGGGAAAGTAATACTTATGAGCTAGTTTTCAGTTTTCTAGATATTTTTTCTTTCTCAAATTTTCCCAGTAACCAAACAAACATGGTGTTTCTAGTTG
CPSSR_31	AAC	42	6|FCHL5JJBBXX_L2_wHAXPI059581-29_1_(paired)_contig_45159:118-335|+	5|LP150221_R1_(paired)_trimmed_(paired)_contig_78197:5024-5038|+	8|LP161083-1_R1_(paired)_trimmed_(paired)_contig_98353:402-425|-	N/A	4|TCunknown-1_(paired)_contig_31693:669-680|-	1.48	0.2	0.98	AGTGTTGGAAAAGAAGTTTGGGTGACTTGAATTGCACCTCTTGTAGTCTTTCTCTGTCACCTCCATAACAGAGTCCTTCCTGTACTTGAAATCTGTACAA	AAAAAAACAGGTGAAAAATCAAATTTTGTGCATAACCCAGTTTACAAAATTCATTTTTGTGCAAGACCCAGATTGTAAATTCAAGTGCATTTGATTGGTA
CPSSR_32	AAC	44	7|FCHL5JJBBXX_L2_wHAXPI059581-29_1_(paired)_contig_104888:298-518|+	9|LP150221_R1_(paired)_trimmed_(paired)_contig_4796:558-584|-	8|LP161083-1_R1_(paired)_trimmed_(paired)_contig_40517:726-749|+	N/A	N/A	0.82	0.4	0.99	ATAGTTGTTCCCATAGTAGCCGCAGTTGCAGCAGTAATATCTGCCCTTTTAATTGCATTTGCCATCTGGTGGATATTCTTCCTCAAAAAGAAAAAACCAA	AGTATCAACAACAACAAGGTATTATAAGTTGAAAATCCCCATCCCATTCTCCAATTAAGGTGTTAAACATTTGTATATTTAAACTTGACATCTTTACAGT
CPSSR_33	AAC	45	7|FCHL5JJBBXX_L2_wHAXPI059581-29_1_(paired)_contig_105437:517-737|+	6|LP150221_R1_(paired)_trimmed_(paired)_contig_152298:933-950|-	6|LP161083-1_R1_(paired)_trimmed_(paired)_contig_118799:790-807|-	N/A	N/A	0.47	0.4	0.99	AGGAACAGCTTTCATGGTCTGCAAAGTCGTTCGGACTCTGCTATTCATCCCTCTCCCAAGACCCAACTAAATTAAATTCCTCGAAAATAAGACAACATTA	CTCTGCAGTCTTCTGCAACATTTAATCAACTAACTACCCCAATTCATTCCATTAAATTATCAGAAAACAAAAACAAACAACAACTCTAATTCCTTTAGAT
CPSSR_34	AAC	46	7|FCHL5JJBBXX_L2_wHAXPI059581-29_1_(paired)_contig_166871:212-432|+	4|LP150221_R1_(paired)_trimmed_(paired)_contig_63645:94-105|+	5|LP161083-1_R1_(paired)_trimmed_(paired)_contig_19277:867-881|-	N/A	N/A	1.25	0.4	0.97	AGAGAAGAAAACAAAGACAAGAAACAAGTTGTTGACCACATGGCAAATACCAAATATATATATAGGAAAAGGAAACACACCATGAGAAGAAAACAACAAA	AAAACACACAAAAACAAGTTGCCTCTCCCACAAACTGAGAAGCCCATATCCTATTTTTATATTATGAACGTGTTATGTAGGTAAAGGCAAAGGCAGAGAC
CPSSR_35	AAC	47	7|FCHL5JJBBXX_L2_wHAXPI059581-29_1_(paired)_contig_231214:75-295|+	8|LP150221_R1_(paired)_trimmed_(paired)_contig_106659:674-697|-	4|LP161083-1_R1_(paired)_trimmed_(paired)_contig_66746:646-657|+	5|FCHL5H3BBXX_L3_wHAXPI062220-17_1_(paired)_contig_136759:179-193|+	N/A	1.58	0.2	0.99	ATTTGAACTTGTTAACCAAACATCATTTCCATCATCAACAGCAACAACAGCTAGCATCAAAGGTTTTTTAGAAATCAAATAATCAACAACAACTAGCTTG	AAGGGCAAGTCATAAAGCAACAAAAAACAAACTAGTTCATGCAACAAAGAGAAAGCAATCTAGAAGGAGAAAGTGAGAGAGACCCCATTTTTAAAAACAG
CPSSR_36	AAC	48	8|FCHL5JJBBXX_L2_wHAXPI059581-29_1_(paired)_contig_185822:52-275|+	7|LP150221_R1_(paired)_trimmed_(paired)_contig_89521:340-360|+	N/A	6|FCHL5H3BBXX_L3_wHAXPI062220-17_1_(paired)_contig_64203:213-230|+	N/A	0.82	0.4	0.96	AGACTCCATAGCTTTCCAAGATGAAGAAGACCCACTTTCAGTTTGGGTTCAAGTTTTGGGTCATGCTACTTCTTCTTGTCAACTGTGCTGCAGACACTGA	GACGACGACGATGACAAACCCAGATGATGCTACAGTAATGCTGGCTCTCAAACAGAGCCTAAACCCACCAAAAACTCTCGGATGGTCCGACACAACTGAC
CPSSR_37	AAC	49	9|FCHL5JJBBXX_L2_wHAXPI059581-29_1_(paired)_contig_1948:75-301|+	N/A	N/A	6|FCHL5H3BBXX_L3_wHAXPI062220-17_1_(paired)_contig_158473:1416-1433|-	6|TCunknown-1_(paired)_contig_10733:242-259|+	1.41	0.4	1	CTTATTACGGGTATGAGAGCAGTTTTTTCAGACTTGATCATCAGGAACCAAGTATGATGATGTCGATGGACGGTGGAGATTCAACCACCTTCAGTTCTGG	GGATGTGATGAAATCAACGGCAGCAGCCTGCAAGAGTCACAAGGAAGCAGAGAGGAGGCGCAGGCAGCGAATCAATGCTCACCTCTCCACTCTCCGCACT
CPSSR_38	AACA	50	5|FCHL5JJBBXX_L2_wHAXPI059581-29_1_(paired)_contig_157641:122-341|+	6|LP150221_R1_(paired)_trimmed_(paired)_contig_7266:3530-3553|+	4|LP161083-1_R1_(paired)_trimmed_(paired)_contig_73411:271-286|+	4|FCHL5H3BBXX_L3_wHAXPI062220-17_1_(paired)_contig_130428:196-211|+	N/A	0.83	0.2	0.99	ATCTCTAGATGTTAACACCACCATGACCCCTTTAGAAGCTAACTGCTTACATATCTCAAACCCAATCCCCTTGTTTGCTCCTGTAACTACTGCATACCTG	AATCCCATTTAAGAGTGTGATGAAGCATAGATAGCGGTCCTCGTAGAGGCTTAATAGTTTGCGCCTTGTAAGTTGAGAGCTCATTCAAGGTATATTAATT
CPSSR_39	AACA	51	5|FCHL5JJBBXX_L2_wHAXPI059581-29_1_(paired)_contig_45910:32-251|+	3|LP150221_R1_(paired)_trimmed_(paired)_contig_122480:645-656|+	3|LP161083-1_R1_(paired)_trimmed_(paired)_contig_33142:935-946|-	N/A	4|TCunknown-1_(paired)_contig_8908:858-873|-	0.83	0.2	0.99	AACCTGTCTGTCTCTCCTCTCATTTCTCCCCATTCCCCATCTCACTTTTTCTTCCCATCTCAGAGGAAAAGAAGCAACAAAAAAAGGCCCCATCATCAAC	CAAACAAAAAAAGCTTTCACCACCCCCGCCGGCATAGCATCCGATCTCTCTCCTCCCTCTCTTTTCTCTCTTATTCCCATTAATAATCAATGAGCAATCG
CPSSR_40	AACA	52	8|FCHL5JJBBXX_L2_wHAXPI059581-29_1_(paired)_contig_290130:37-268|+	5|LP150221_R1_(paired)_trimmed_(paired)_contig_52832:477-496|-	N/A	N/A	6|TCunknown-1_(paired)_contig_33551:787-810|+	1.25	0.4	0.99	AAAACTGAAAAAAGATATACCTGAAGTTTATGCAATTCATCAGAAATTAGTTTATAGGAATCCATTAATAATTCATTCTGTTTCTCCAAGTGCCTGCACT	AATCATCAAAGTTCAATTCGCAAATTATTTCCTACGGAGAACTTTAAAATCAAACACAATTGGCATCAACATGAAATTACTTTAGCGTCTCTGGCGCGTG
CPSSR_41	AACTC	53	5|FCHL5JJBBXX_L2_wHAXPI059581-29_1_(paired)_contig_281730:42-266|+	4|LP150221_R1_(paired)_trimmed_(paired)_contig_117580:1278-1297|+	4|LP161083-1_R1_(paired)_trimmed_(paired)_contig_152474:807-826|-	N/A	4|TCunknown-1_(paired)_contig_123786:666-685|-	0.43	0.2	0.99	GTTTCGCGGCTGCTCTGTTGGGTGCAGAGTGAGTAGGATGTCTTCCTTGGTTTGTTAGCACTTTCGTTATTTTTATCTTGCTAGTTAATTTTCAGCTGTA	AACGGGAGCTGCAGTTTCAGTTAATTGGAATCATTTACAGAAACCATCTTTCTAACTCTTACTTTTATAAATCCATGTCAATTATAGCCCCTCGGATTTT
CPSSR_42	AAG	54	5|FCHL5JJBBXX_L2_wHAXPI059581-29_1_(paired)_contig_102302:12-226|+	9|LP150221_R1_(paired)_trimmed_(paired)_contig_23030:558-584|-	10|LP161083-1_R1_(paired)_trimmed_(paired)_contig_159167:794-823|+	N/A	N/A	2.16	0.4	0.97	GTCTGAAACAAACCCTTTCGGTAATGGAGCTATTCGTGTTTATTTACGCGAAGTCAGGGACTGTCAAGCTAGAGCTAGAGGCATACCGTATAAGAAGAAA	ATTCAGATCAAGGCGAAAGACGAGGCCAGACCTTCCAAACAGGCCTCTCAATGAAGTCACTTTTCGGTTTCTTCATCAACTATTATACGTACTATGGTAA
CPSSR_43	AAG	56	5|FCHL5JJBBXX_L2_wHAXPI059581-29_1_(paired)_contig_127327:19-233|+	4|LP150221_R1_(paired)_trimmed_(paired)_contig_37380:1225-1236|+	5|LP161083-1_R1_(paired)_trimmed_(paired)_contig_160676:621-635|-	N/A	5|TCunknown-1_(paired)_contig_11534:459-473|+	0.43	0.2	0.99	TCCAAGGAAAAACATAAAAGGAGAATGCACAAGCTGGTGTGCATATGTAAAATGAAGAACTGACAGACACTCTCCATAACAAGTGGAGCTAGATACTGAA	TCCTTAGGTCCAACGATGAAGCTGAGTGAGAATTAGTTAGATGGACATGGACCATCTAATCCTTGAACCAGAACGAAGTGAAGACTAGCAGAGCATTACC
CPSSR_44	AAG	57	5|FCHL5JJBBXX_L2_wHAXPI059581-29_1_(paired)_contig_131032:241-455|+	6|LP150221_R1_(paired)_trimmed_(paired)_contig_236693:705-722|+	5|LP161083-1_R1_(paired)_trimmed_(paired)_contig_137775:166-180|+	N/A	N/A	0.47	0.4	0.99	CTTCAGTTGGATGATTTTGCTCGAGTGGCCACCTTATCGAAAAAGTTCAGAAATCGATGTTTCTTTGAAACCAGCTTAGAGATTAATTTAAGTTTACCTA	GAGTAAAAGAAGAGAACGAGAATTTAAATGAACAAAATCCAAGGAGGCAACCACACTATCCATCTTATGGAAGAGAAGAGGAAGAAAAAAAGGAAAAGTG
CPSSR_45	AAG	58	5|FCHL5JJBBXX_L2_wHAXPI059581-29_1_(paired)_contig_135504:122-336|+	4|LP150221_R1_(paired)_trimmed_(paired)_contig_108420:1517-1528|-	4|LP161083-1_R1_(paired)_trimmed_(paired)_contig_211600:472-483|+	N/A	6|TCunknown-1_(paired)_contig_37619:267-284|-	0.83	0.2	1	ACATGGCCACAATTAGCCCTTCAATAGTTGGCTCACTTTCCAAATTGAAGTCCTTCTTAATGTATAAAACAGCCCCTGTAACAAAACCAGGAAACCAAAA	GAAAATCATTCATAAGAACAATTTGGCAGCAGCTCAAACCCATACATGCATATAAGTAAAACCAGAGCAGATAAAGCATCATCAGATCAATCAAGGTTCA
CPSSR_46	AAG	59	5|FCHL5JJBBXX_L2_wHAXPI059581-29_1_(paired)_contig_151808:244-458|+	6|LP150221_R1_(paired)_trimmed_(paired)_contig_99142:1579-1596|+	N/A	6|FCHL5H3BBXX_L3_wHAXPI062220-17_1_(paired)_contig_198571:743-760|+	N/A	0.47	0.4	0.99	GATATCCCTTTAGTTTGAAATTTTATTGCTCCATTTTATTTATTTATTTTCCATTACTGGTTGTGAACTCTGTTATTTTAGGGAAAGGAAGCCAAAGGAA	AGGCAGGCATTGGGAGTCAGAGTTACTTCATCTGTATTAGAGGGAGGCCATCACCTATTTGGTGATGTTGATGAGCTCTTGCAGCAACGGAAGCAAGGCC
CPSSR_47	AAG	60	5|FCHL5JJBBXX_L2_wHAXPI059581-29_1_(paired)_contig_178341:9-223|+	5|LP150221_R1_(paired)_trimmed_(paired)_contig_165957:524-538|+	5|LP161083-1_R1_(paired)_trimmed_(paired)_contig_265508:717-731|+	6|FCHL5H3BBXX_L3_wHAXPI062220-17_1_(paired)_contig_163123:327-344|+	N/A	0.43	0.2	1	TCAATGGCGGAAGCTGAACAAATCAGTAGTTTTCCAAGAGATCTGTTGTTACAGACATTTATTCCCAGCGGGAGTAATTTTCATGGAAAGTTTGAGGTTA	GAAAAATTGAAGAAGACAGAGAAGAAGAGATTGAATTAAGCCTTGGGCTTTCATTGAACGGTCGGTTTGGGGTAGACCCATGTTCCAAAAGGCTCAAACG
CPSSR_48	AAG	63	5|FCHL5JJBBXX_L2_wHAXPI059581-29_1_(paired)_contig_196991:476-690|+	N/A	5|LP161083-1_R1_(paired)_trimmed_(paired)_contig_22596:1958-1972|-	7|FCHL5H3BBXX_L3_wHAXPI062220-17_1_(paired)_contig_243530:993-1013|-	6|TCunknown-1_(paired)_contig_18626:2357-2374|-	0.83	0.2	0.99	CTCTTAATAGCATAGTTGTTTGACTAGCAAACATAAAATGGGTGTATTTAATCTTGATCAGTCCCTTGTAAGCATCCTATGTTTTGATTTGTCACCACAA	AAATAACATAGCCATGTCGTCCCTATGCAGGTCATTAATATTAAAACATAAACTGATCATGTAACAATTCATACCGGCAGCTCTTCCTCACCAAGGAGGC
CPSSR_49	AAG	66	5|FCHL5JJBBXX_L2_wHAXPI059581-29_1_(paired)_contig_48586:1435-1649|+	6|LP150221_R1_(paired)_trimmed_(paired)_contig_121254:790-807|-	N/A	5|FCHL5H3BBXX_L3_wHAXPI062220-17_1_(paired)_contig_29606:145-159|+	N/A	0.47	0.4	0.99	AACATGGTATCTCCTACAAAGGGTCACATTCTTGATTCTTGCTCCTTTTCCATTCTTTTTGTACACACTTGGAAAAGGTTACAACTCTTGAAAAGCTTAA	ATCTCAACGAGATAAAACAAAAAAGAAGAGAAAACGGAAAGGAAATGAAAAGGACCCCATCATGCATGGCAAGTAGACTCTGCTTCTTCCAGTTCAATAC
CPSSR_50	AAG	67	5|FCHL5JJBBXX_L2_wHAXPI059581-29_1_(paired)_contig_63245:1953-2167|+	5|LP150221_R1_(paired)_trimmed_(paired)_contig_62605:292-306|+	5|LP161083-1_R1_(paired)_trimmed_(paired)_contig_85889:3199-3213|+	4|FCHL5H3BBXX_L3_wHAXPI062220-17_1_(paired)_contig_121343:280-291|-	N/A	0.43	0.2	0.99	AATTCATTGCACCGTTGAGTCCTGCAAAACATTATCAATTCAGCAATCCACAAGAGTACTCTTGACTAGTAAAAGGACCTCAATTTGAGAGTACAAAATC	AAACAACAAAAATTATGTCCCAGTCTAGTGAGTTCAAGAACTTTAGGCACATCTCAAGATAAATTAAAAAACTCTACCCAGGTCTTAGAGCTCAACTAAT
CPSSR_51	AAG	69	5|FCHL5JJBBXX_L2_wHAXPI059581-29_1_(paired)_contig_8911:1913-2127|+	5|LP150221_R1_(paired)_trimmed_(paired)_contig_17303:1817-1831|-	5|LP161083-1_R1_(paired)_trimmed_(paired)_contig_64237:2741-2755|+	6|FCHL5H3BBXX_L3_wHAXPI062220-17_1_(paired)_contig_59622:340-357|+	6|TCunknown-1_(paired)_contig_19721:1416-1433|-	0.49	0	0.98	CGACGAGTCAAATTCACATCTTGTACTAAAGATCATAATCCCAGTTGTCAGCTTCATTATGTTCGTCTGTGCAATTATATACATTGTGTTAATCTGCCAA	AGAAGGTATATAGACCGCTCCTCGTCTCTTCCTTTGAAGGGGTTTCCACAACTGATATCCTATGCTGATATTCAGGCTGCTACAGATGGATTTGGTGCAG
CPSSR_52	AAG	70	6|FCHL5JJBBXX_L2_wHAXPI059581-29_1_(paired)_contig_107871:424-641|+	7|LP150221_R1_(paired)_trimmed_(paired)_contig_23251:146-166|-	7|LP161083-1_R1_(paired)_trimmed_(paired)_contig_44596:305-325|+	N/A	N/A	0.47	0.4	0.99	TGCATTGAATATCAGGAGTCTCATTGATATCTCCATTTTTACAATTATTATTGTTTCTATCTTCTCCTTCTGAACTAGACTCCATTGATAGACGACGACC	ATCAAAATCTAACGAACCTTCAACACCCCAAGAATCAAAAACTCAGAAGAAGAAAACTAGGGTTTTCCCGGGAAACAAACAGAAAAGGTGGGGGGGATTG
CPSSR_53	AAG	71	6|FCHL5JJBBXX_L2_wHAXPI059581-29_1_(paired)_contig_145038:83-300|+	5|LP150221_R1_(paired)_trimmed_(paired)_contig_43397:2022-2036|+	5|LP161083-1_R1_(paired)_trimmed_(paired)_contig_214789:445-459|-	N/A	N/A	0.47	0.4	0.99	GACCAAGCTTCAGTACAGATTATCTGCTTCAGATATGGCTGCTTTAGCTGTTAAAGCCACCATTGCTCTCCAAAATTCCTCCTCCGATACTGCTCAAAAT	AAAACTCGTATTTCTCCAGTTGTACTCCTCAGAGATCAACATCAACCTATAAATAATGCAGAATCCATTGAACTAGACACTAAAAGCTTCTTGATGAGCT
CPSSR_54	AAG	72	6|FCHL5JJBBXX_L2_wHAXPI059581-29_1_(paired)_contig_182734:12-229|+	N/A	8|LP161083-1_R1_(paired)_trimmed_(paired)_contig_203081:445-468|-	6|FCHL5H3BBXX_L3_wHAXPI062220-17_1_(paired)_contig_232755:360-377|-	N/A	0.94	0.4	0.99	AGATCCGAATCCGATCACGTTGACAAGCCTACTCATGGTCTGATGAGCATGGATCGCATGATCGAAAGACTAAGAAATAAATTAATACAAGGGACAACAA	AAATAATGTAGCGATTCCCAAACAATTTGAAAAAAAATCCAGTTATCAAAACTTCATCCCACCTACATCAACTAATTTATTGCATACTCATTATCCTTAC
CPSSR_55	AAG	74	6|FCHL5JJBBXX_L2_wHAXPI059581-29_1_(paired)_contig_213431:81-298|+	4|LP150221_R1_(paired)_trimmed_(paired)_contig_17112:636-647|+	N/A	4|FCHL5H3BBXX_L3_wHAXPI062220-17_1_(paired)_contig_91689:482-493|-	N/A	0.94	0.4	0.99	TTGACCAAATAACTTGATTAAATTAACCCACATATAGAAATTCATCATCAGATCGCTCAAATGATAATTTTGTTCAAAATTGATCAGATTATTGTAAAAA	AAATACCTTGTTTGTGACCGGCACCTTTGTCGACGGTGTGACACTGAGCGCACTTTGTCCTGAAGATCTTGTCTCCAGCCTTAGCGTCGCCTGGTGGAGC
CPSSR_56	AAG	76	6|FCHL5JJBBXX_L2_wHAXPI059581-29_1_(paired)_contig_285413:94-311|+	7|LP150221_R1_(paired)_trimmed_(paired)_contig_142562:225-245|+	6|LP161083-1_R1_(paired)_trimmed_(paired)_contig_217455:540-557|-	N/A	N/A	0.47	0.4	0.99	CATATTTTAGAGATTAAAAGATAAAATTGTGACAATAATTTCTGAAATTTAATGGTTCCGTCCTGAGGTTTTATTCAGAAGATAATTAACTAAAGATACA	CCACGGACCGATGGATCGAGAGAAAAAAAATCAGAGATTTAGGATAAATGTAAAAAGCTTTCCATAAAAAAAGAAGAGGACAAGTGTAAGAAGCTAAATT
CPSSR_57	AAG	77	6|FCHL5JJBBXX_L2_wHAXPI059581-29_1_(paired)_contig_44347:581-798|+	5|LP150221_R1_(paired)_trimmed_(paired)_contig_67028:1935-1949|+	5|LP161083-1_R1_(paired)_trimmed_(paired)_contig_14693:409-423|+	N/A	5|TCunknown-1_(paired)_contig_47726:266-280|+	0.43	0.2	0.98	ATCTGCACGTATGAACAGTCCGAAACCGCAATCGACGATCATTCGAGCCGAAGAGAGCATCGGTTTTTTATATGAAAAAGGAGATGATGATGAACTCATA	AAAGAAAGAAATGGAGAATTGTTTCCCATTCAAAGAGGAATCATGCCAAGGTAATGACACACCTTAATTCGATGTCGTGTTTTTCTATGATATGAAAAGG
CPSSR_58	AAG	79	6|FCHL5JJBBXX_L2_wHAXPI059581-29_1_(paired)_contig_68388:463-680|+	5|LP150221_R1_(paired)_trimmed_(paired)_contig_25428:942-956|+	N/A	5|FCHL5H3BBXX_L3_wHAXPI062220-17_1_(paired)_contig_235764:215-229|+	6|TCunknown-1_(paired)_contig_17735:436-453|-	0.5	0.2	0.97	GGTACACCTAAATGTGAAGGAGATGATCACTCAAAAACAACTAAGAAGAAGACAAGTAAAATAAAGACACATAAAAAGAAGACTCGTCAACAAGAAAATC	AGTCAGGAGGAGGAGGAGAAGAAGATCTCATAGATATTGAAGGATTTGTGCAGATCGGAGAAGAACATCTCATCGATGTTGAAGGATTGGTGCAAATCGG
CPSSR_59	AAG	80	6|FCHL5JJBBXX_L2_wHAXPI059581-29_1_(paired)_contig_72292:1340-1557|+	7|LP150221_R1_(paired)_trimmed_(paired)_contig_152812:482-502|+	7|LP161083-1_R1_(paired)_trimmed_(paired)_contig_61296:1952-1972|+	N/A	N/A	0.47	0.4	0.98	ATGGCGGCGCTGCCATTGATGGTCCAGCCTGAACAGCAATGGCCGCAGCAACGACACTTGGAAGAAGACGGAGATGAGAACGACAACATGGTTCAGAATC	ATGGCGGAGACGAAGAAGATGACGAACTCGACGACGATGATGATGAAGATGATGAAGGTGGTGGTGGTTACGAGATAGTATCAAACAAACCTGCAAATTA
CPSSR_60	AAG	81	7|FCHL5JJBBXX_L2_wHAXPI059581-29_1_(paired)_contig_143681:154-374|+	N/A	N/A	8|FCHL5H3BBXX_L3_wHAXPI062220-17_1_(paired)_contig_48129:222-245|+	8|TCunknown-1_(paired)_contig_33487:751-774|-	0.47	0.4	1	CCAGAAGTAACTATGTCATTGACACTCATGGCAACCTGAATTACAAGTGCACGAGCAAACCAATCAAAATCAGTAAAATGACGGGAAAAAAGAAAAGAAA	ACATAAAATTTACCAGATCAATCCCAATAGTATCATGGATTCCGGTTTCAAATGCAATTTTAAGTTTCGTACCAACGCCATCTGTACCAGCGACAAGGTA
CPSSR_61	AAG	82	7|FCHL5JJBBXX_L2_wHAXPI059581-29_1_(paired)_contig_222203:126-346|+	6|LP150221_R1_(paired)_trimmed_(paired)_contig_18444:255-272|+	N/A	6|FCHL5H3BBXX_L3_wHAXPI062220-17_1_(paired)_contig_6246:318-335|+	N/A	0.47	0.4	0.99	CCCCACATTTTCTCGGCATCCAAACAGTGGGTAAATAAAACCCCTAAAATCCCAAAAACCTGGGGGAATTCAATTCAATTCAAGAATCAAAATCAGATGA	GAAAATGAAATAATTGAAAGAGAAAATTACCAGCATTGCCACAGCCGACCATGAGGATACGAGAAGAAGTGGGGACGTACTTGCGAACGAATGGTCGAAG
CPSSR_62	AAG	83	7|FCHL5JJBBXX_L2_wHAXPI059581-29_1_(paired)_contig_239157:174-394|+	5|LP150221_R1_(paired)_trimmed_(paired)_contig_38769:277-291|+	7|LP161083-1_R1_(paired)_trimmed_(paired)_contig_214780:174-194|-	N/A	N/A	0.94	0.4	0.96	TAAAAACACTCACTTCATTGAAACACCAAAAGCAATGACTTTGGATGCCACAAGAAATTGCAAAGATAATTATGAATTTCTATTACAGTGTGAAAACAGT	AGGTCGAACCCGATTTTTTCAATGTGACGGCGTCGCCGCCGAAGTTTGTCAAATTCCGACGGAGCTTCACCGGAGGAGTATTTGAAGCAGTAACATATGT
CPSSR_63	AAG	86	8|FCHL5JJBBXX_L2_wHAXPI059581-29_1_(paired)_contig_127444:962-1185|+	5|LP150221_R1_(paired)_trimmed_(paired)_contig_35121:764-778|+	N/A	7|FCHL5H3BBXX_L3_wHAXPI062220-17_1_(paired)_contig_162120:311-331|-	N/A	1.25	0.4	0.96	GACTCTCCACCACCATCATTGCATCCTCACCATGACACACCTTCCCATATCATCATCATTCACCCCCACCACAACCATATTATTCCAAAAGAAGATCATC	AAAACCAAGGGCTTTTTCCATATGACTATACCCTAATTTTCACTTTGAATCTTCTATGAGAGTGAAGAAGGGTGGTCTCAAATCTCAATGATCATCACTT
CPSSR_64	AAG	87	8|FCHL5JJBBXX_L2_wHAXPI059581-29_1_(paired)_contig_130991:1029-1252|+	5|LP150221_R1_(paired)_trimmed_(paired)_contig_160202:587-601|-	5|LP161083-1_R1_(paired)_trimmed_(paired)_contig_184668:552-566|-	6|FCHL5H3BBXX_L3_wHAXPI062220-17_1_(paired)_contig_59467:236-253|+	N/A	1.22	0.2	0.99	TTCTTATTGTTATTAGCAAAAAACTTCAATTCATTGGCTGTTTTGGAGTGATTTTCAATATCAGAATCATCATAAGAAGGAGATGCTCTAATAGGAATGA	AACCTGGTGAATTTGAGAACGTGGTTTCTGGTACAAAAGCCTTCGACTCCATGGATTCAAGCTCCTGTTTTGTATTGAATTGGAGTGGGTTAGGTATTTG
CPSSR_65	AAG	88	8|FCHL5JJBBXX_L2_wHAXPI059581-29_1_(paired)_contig_68298:275-498|+	6|LP150221_R1_(paired)_trimmed_(paired)_contig_136071:399-416|+	N/A	6|FCHL5H3BBXX_L3_wHAXPI062220-17_1_(paired)_contig_5020:1314-1331|-	N/A	0.94	0.4	0.99	GTGGTTGAGCGGCTATCAGGACTGAGAAGTCGAGATGGCAATTTGTTACAGGAGTGCTTTAGTTCGCTGATGGAGGCGTCTGTTCGATTGAAAGAAGTGC	ATGGCGATGATGGTGATGATGACTGGGTTGAGGATGACGGTACAGATGACAGTGGTGAAACAGATGAAGACAACGAGGTTTGATTGCCAAAATCCTTGTA
CPSSR_66	AAG	89	9|FCHL5JJBBXX_L2_wHAXPI059581-29_1_(paired)_contig_194574:165-391|+	9|LP150221_R1_(paired)_trimmed_(paired)_contig_113886:403-429|-	8|LP161083-1_R1_(paired)_trimmed_(paired)_contig_72485:678-701|+	N/A	N/A	0.47	0.4	0.98	TCAAATCCATGTGGGGATGCATATACACACCGGCTTTTGTTTGTTTTAGATTTTGATTTTCTGAATGTAGTGTTTGATAAAAGTGGTTGTGTAAATGTTT	AGAGAATGGCTAGCCCCCTGCTGTTTGTAAACTGTAATTCTCTGTGTTGGATTGAGGAGAAAGAAAGACCCATGTGAATAATCTTGGAATAGTCATACCC
CPSSR_67	AAT	92	5|FCHL5JJBBXX_L2_wHAXPI059581-29_1_(paired)_contig_154507:1639-1853|+	6|LP150221_R1_(paired)_trimmed_(paired)_contig_135398:441-458|+	6|LP161083-1_R1_(paired)_trimmed_(paired)_contig_113706:187-204|+	N/A	N/A	0.47	0.4	0.99	CAAACAACAACCAGCAAATAATCTAGTAATAACTTATAACTATACGAAAAAGAATAATAATAATATCACAGGATAGATCAACATCAACTATAAGAAAAAG	AGCAGGTCAGGTACATTATGATTGGTGGATATGCAATTCAATTCAATTGTTTTGGGAAAGTTATTATTGCCCTGTTTTGTTCAAACCACAAAGCATATAT
CPSSR_68	AAT	93	5|FCHL5JJBBXX_L2_wHAXPI059581-29_1_(paired)_contig_24290:442-656|+	5|LP150221_R1_(paired)_trimmed_(paired)_contig_17404:653-667|+	6|LP161083-1_R1_(paired)_trimmed_(paired)_contig_230054:472-489|+	N/A	N/A	0.47	0.4	0.98	ATTCGAGTGCAGCGACACTGTGGCAACATAGCACACATTAAAGTTAATACAATATTTTTTACACATTGATCTAGTAAAGAAATAACTCCATTAGCAAATA	AAAGAAATAACTGTATTTAGCATCTGATGGTTTGGGCATTCTCACTAATCTGCGAAAGAAGGCTGATGCTACGAACTATATATTCTAGTGAATAAAGGGT
CPSSR_69	AAT	96	5|FCHL5JJBBXX_L2_wHAXPI059581-29_1_(paired)_contig_311344:40-254|+	3|LP150221_R1_(paired)_trimmed_(paired)_contig_94794:748-756|-	3|LP161083-1_R1_(paired)_trimmed_(paired)_contig_238340:186-194|+	N/A	N/A	0.94	0.4	0.99	TTTCTTGATATTGGCAACAAAATGCTCTGTTTGGACTATGAGAAAATTAAATAAATGAGAGCAAAGTGTAGTCAATAACTGCTACCAAATCACGTAATAC	AAACATAAATAGTTACCCTTCTCTGATTAGCTTGTCTTCTTTCCTCAAATTGTAGTCTCCTTCGCAACCTCGTTATGTACCCCTCATGAACCTTGTCATA
CPSSR_70	AAT	97	5|FCHL5JJBBXX_L2_wHAXPI059581-29_1_(paired)_contig_43525:87-301|+	8|LP150221_R1_(paired)_trimmed_(paired)_contig_81346:182-205|+	7|LP161083-1_R1_(paired)_trimmed_(paired)_contig_88079:131-151|-	N/A	N/A	1.25	0.4	0.99	GGTAACCGCCCACTCTACTACAAATAAGACACACTATCACCATTGTTAAACTTTTTTCCCGAATCTGCAAATCAAAACTGTTATTGCTGTTGATATGGAA	ACAGAGGAGGAGAGTCCAGATTTTCACTTCCCACCACCACCAACACCACCAACCCAACAACAATTCTTCCCAAATTTCACATCTTCAAGCCCTGAAACCT
CPSSR_71	AAT	98	5|FCHL5JJBBXX_L2_wHAXPI059581-29_1_(paired)_contig_48170:301-515|+	6|LP150221_R1_(paired)_trimmed_(paired)_contig_94682:520-537|-	6|LP161083-1_R1_(paired)_trimmed_(paired)_contig_206900:226-243|-	N/A	N/A	0.47	0.4	0.99	AAACCCTTCTCAATTTTTTTCCTGAAATAAATAAACAAAACAGAAACTCAGAAAGTGTTAGTGGGTCTGTGCTGGGCCATTGGACCTATGTGCTTAAACC	AAAAGGATGATATAGTAGTAGCTACACTACTAGCACAGATGGGCCCACTAAAAAAACAGACTCTCTTTTTATGGGCCCAAACCTCAATAATGATTCATCA
CPSSR_72	AAT	99	5|FCHL5JJBBXX_L2_wHAXPI059581-29_1_(paired)_contig_56120:622-836|+	4|LP150221_R1_(paired)_trimmed_(paired)_contig_54103:748-759|-	3|LP161083-1_R1_(paired)_trimmed_(paired)_contig_104338:533-541|+	3|FCHL5H3BBXX_L3_wHAXPI062220-17_1_(paired)_contig_176756:357-365|+	N/A	0.83	0.2	0.96	CTTGATCCTCCTACGTCAATACTGAGGTCGCTAGAAACATCAGATATCGGCCTGCAATATGAAACCTTAGAGTAATTGGCATCACATAGACAATTAAATC	AAAACTAAAAAAATTGTGAATGCATACATGTTTGATAGTATTCTAAACATTCCGAAAAACCTTGCAAAATTTTCTCCTACTCTACGCCAACTTTTTCATG
CPSSR_73	AAT	100	5|FCHL5JJBBXX_L2_wHAXPI059581-29_1_(paired)_contig_64246:794-1008|+	6|LP150221_R1_(paired)_trimmed_(paired)_contig_82412:1414-1431|-	6|LP161083-1_R1_(paired)_trimmed_(paired)_contig_69862:233-250|+	6|FCHL5H3BBXX_L3_wHAXPI062220-17_1_(paired)_contig_313402:272-289|-	N/A	0.43	0.2	0.97	TAGAGGTTGGATGTGTTTGCTGTAATTGGTCTGGGTTTTCTTTGGAGCTTTGTAAGTTCTCATCTTTTATAAAAATTATTTTTACTGACAAAAATAAATA	AGAGAGAAAGAAAATGAGACTTGTGAATAAAGTTTTTTAAAGTCTATACAAATGTTGTTGTAAGATGTGAGAGAAATTATAGATTTGTGTGTACGCCTAT
CPSSR_74	AAT	102	6|FCHL5JJBBXX_L2_wHAXPI059581-29_1_(paired)_contig_122722:323-540|+	4|LP150221_R1_(paired)_trimmed_(paired)_contig_172293:1345-1356|-	4|LP161083-1_R1_(paired)_trimmed_(paired)_contig_138924:373-384|+	4|FCHL5H3BBXX_L3_wHAXPI062220-17_1_(paired)_contig_306103:342-353|-	N/A	0.87	0.2	0.97	ATCTTGCATAGTTGCATAATAATGAAAATAAAATTTAGCTAAATAAAATTGAAAATTTCAAGGCATTATCCAACAAGTAACAACTGTTTGGAGTTTGAAA	ACTGTAATAAATACAGAGCTTAAACAATATAAAAAATAAAAATAAAAGGATGTACCTTCTCTTTTCTTCTTCTTCCTTTTTCAATATCTCAACTGTAATC
CPSSR_75	AAT	104	6|FCHL5JJBBXX_L2_wHAXPI059581-29_1_(paired)_contig_186569:162-379|+	N/A	N/A	5|FCHL5H3BBXX_L3_wHAXPI062220-17_1_(paired)_contig_231285:636-650|+	4|TCunknown-1_(paired)_contig_29244:3248-3259|+	0.82	0.4	1	TTTTACTGCTGGGATTGATGGAGGTGAGAACGGGGTATTGAGTTTGGGGTTTGAGTATGATGGGGAGGAAGGGGATGAGAATTATCACAATAACGGTAAC	AACGAGCGGATAAGGGAGGATGGAGAGGATGGTTTTGCGTATGAAGAAGTGGAGCCAAATGGGTCTAATCCAAGGAAGAAGAGGAAAATGTTGAAGGGGT
CPSSR_76	AAT	105	6|FCHL5JJBBXX_L2_wHAXPI059581-29_1_(paired)_contig_214389:578-795|+	6|LP150221_R1_(paired)_trimmed_(paired)_contig_20803:3350-3367|+	N/A	4|FCHL5H3BBXX_L3_wHAXPI062220-17_1_(paired)_contig_242932:938-949|+	N/A	0.94	0.4	0.97	CCTCCTAACAAAGGTACATGCTGATACACCAATCTCACGCTACTTCTCGGAAAACTAACATTTTCATAATATTTTGTATCGCTATAAAACTATTATTGTA	TTCATTTGTTACGTGTAGATTGTACGTCAGTGACATGCACTGAGCCACTTACATATACAATTCCTGGATCACCCTGTGATTGTGTGCAGCCAATTCAAGT
CPSSR_77	AAT	106	6|FCHL5JJBBXX_L2_wHAXPI059581-29_1_(paired)_contig_27668:469-686|+	5|LP150221_R1_(paired)_trimmed_(paired)_contig_106475:945-959|+	5|LP161083-1_R1_(paired)_trimmed_(paired)_contig_168854:796-810|-	N/A	N/A	0.47	0.4	0.99	GTAGTAAAATATATTAAAGCGCGCGTAAAAATAATAACAATGATTATATAAAAATAATAATAACGTGCTAAAATAATGAAAATAATACTAGAGCGCGTAG	AGGGCGCGTAGGAATAAAATAATAGTTAGCGCGCTCAAAAATAATAATGTGACTAAAAATAATACGAACTTATATAAAATAAAAGCGAAAAATTTTATGG
CPSSR_78	AAT	109	7|FCHL5JJBBXX_L2_wHAXPI059581-29_1_(paired)_contig_41428:125-345|+	6|LP150221_R1_(paired)_trimmed_(paired)_contig_1140:164-181|-	6|LP161083-1_R1_(paired)_trimmed_(paired)_contig_21186:1617-1634|+	N/A	N/A	0.47	0.4	1	TTTCTCCTTGGGGGCTTTAGCTTTTGGTAGCATACCTTTGGTATGCTTTTACTTGTAATGGCCTTCGCTTTTCAATATAAGTTCTCTTACCTATCAAGAA	TTACCAATCGGTGATCCGGGTCATCAAGAGGAATAGCCTTCTGGTATGGGCGTGTTGATCCGTTGAACTAGTGACATAACAGTTCATATTTGTATTTTTC
CPSSR_79	AAT	110	8|FCHL5JJBBXX_L2_wHAXPI059581-29_1_(paired)_contig_12751:1172-1395|+	7|LP150221_R1_(paired)_trimmed_(paired)_contig_25993:251-271|-	6|LP161083-1_R1_(paired)_trimmed_(paired)_contig_195370:275-292|+	N/A	N/A	0.82	0.4	1	TACGATGAACATCGTACTCACTGCGAATCCAATTACTGTCATCACCAAATTAATCCCAGTAGACATCATTCTTGATTCTTTTCTGTATTTCTTGATTCCC	AACACCCAAATTTGGATTCCCAAAATGTTTTCAAGTTGTCATCATGATAACATTTCCTTCACTTTCCAACCCCAGAAACCCTAATAATTCTAAAACTAAC
CPSSR_80	AATT	112	6|FCHL5JJBBXX_L2_wHAXPI059581-29_1_(paired)_contig_8483:296-519|+	5|LP150221_R1_(paired)_trimmed_(paired)_contig_64352:3040-3059|-	N/A	4|FCHL5H3BBXX_L3_wHAXPI062220-17_1_(paired)_contig_141623:555-570|-	N/A	0.82	0.4	0.99	AACTTCCTCCCAGTCCCCGGCTCAATATAATACTGCAAAATTAGCTAACATTTCTCAAATTATGACTCTGCAGTACACAATTCAATGAAAATCAAATCAA	AAAACTTAATGCTTAAAATTTCAACATTCTCGCTAAAACTGAAAGTCATTGTAGCGAGCTTGAATGAGAAGCATGGTGGAAATGTTGCTTCAAGATCATC
CPSSR_81	AC	113	10|FCHL5JJBBXX_L2_wHAXPI059581-29_1_(paired)_contig_198854:123-342|+	9|LP150221_R1_(paired)_trimmed_(paired)_contig_118970:1313-1330|+	N/A	N/A	11|TCunknown-1_(paired)_contig_23675:1272-1293|+	0.82	0.4	0.94	TCCCATCTCATAGCTGTTGCAGGATGCAAAAGAAACTCCTCATCTATAGTCGGGCACCTTCACTTTGATAGTCACAATAGATTTATCAGTCCCCAGCAAA	AGATACACAATAGCTTTGTCAGAGGTGATGGCCTTTGACACTGAAATGAAATAAGACAGGCTTTATCAACACATTCCCAATACAGAACTTGAAACTTTTT
CPSSR_82	AC	114	10|FCHL5JJBBXX_L2_wHAXPI059581-29_1_(paired)_contig_45816:43-262|+	11|LP150221_R1_(paired)_trimmed_(paired)_contig_35424:2750-2771|+	6|LP161083-1_R1_(paired)_trimmed_(paired)_contig_93967:622-633|+	N/A	10|TCunknown-1_(paired)_contig_10408:1856-1875|+	1.92	0.2	0.99	CCCAACTAGACTAGCCCAAAAAACAAGTAAGCGACTGGCCCAACACACATATACACAGACATTAATTGAAACAATAACTTGCTTTGAAGGGCACGGCACA	TTCTTGCAGCTAAACTGCATACAACTCCCAATCAACTAACTAGTTGCCACTCAGGTTATGCCAATTTAATTGCAGCAGTAAAAAATCTACATCATCAATT
CPSSR_83	AC	116	11|FCHL5JJBBXX_L2_wHAXPI059581-29_1_(paired)_contig_200683:159-380|+	8|LP150221_R1_(paired)_trimmed_(paired)_contig_62909:672-687|+	8|LP161083-1_R1_(paired)_trimmed_(paired)_contig_22727:1607-1622|-	9|FCHL5H3BBXX_L3_wHAXPI062220-17_1_(paired)_contig_163983:259-276|+	N/A	1.22	0.2	1	CTTCCAAAGTAGAAGTATATGCAAAACATACATCGTGCTTTCTTGCATTAGTGGCATCCAGTTTTCAATTTATTTATATACTACGTAAATGTAGATGTGT	ATATTTGTGTTGGTACTGAGCCAAATGTTCTGCCTTACAGGAAGAGGCTAGAAAAAACATCCTTTGATAAAACTTCAGAGAAGGTAGCAGCATGATATTC
CPSSR_84	AC	117	11|FCHL5JJBBXX_L2_wHAXPI059581-29_1_(paired)_contig_20998:814-1035|+	8|LP150221_R1_(paired)_trimmed_(paired)_contig_32989:1587-1602|+	10|LP161083-1_R1_(paired)_trimmed_(paired)_contig_60588:1087-1106|+	N/A	N/A	1.25	0.4	0.99	ACCGAAAAATGTGTATGTATGTAAATTATGTATATAAGCTGCCGCCTGTCGAATTCAGTTTATGGAAACAATAAAACACATTACAAGCCATAAAAAAAAG	AAGAAGAAGAGAACAAGTTGATCACATTACAATAACAATTTAGTACAGATGTATTAAAAAGTCACCATATCTATTCAAGCTAACAAGAGAACAAGTTGAT
CPSSR_85	AC	119	11|FCHL5JJBBXX_L2_wHAXPI059581-29_1_(paired)_contig_93669:37-258|+	9|LP150221_R1_(paired)_trimmed_(paired)_contig_25761:1152-1169|-	8|LP161083-1_R1_(paired)_trimmed_(paired)_contig_13593:5206-5221|+	6|FCHL5H3BBXX_L3_wHAXPI062220-17_1_(paired)_contig_80710:596-607|-	N/A	1.8	0.2	0.98	TGCCAGACTAATTGGCCTGAACTTTCATATTACGGCGTTGAAGGGAACATGACTTCAAAATTACCCCCCGCCACACCAAAAAAGTATACATAACACAGAG	ATATATGATCACTTCATATTCAAAATTGCCCCTGCCCCAACTCAATAAACTCCCAACGCCGCTCTAGGATTTAAATAGCTATCAAAATCATTAACCCAGT
CPSSR_86	AC	120	12|FCHL5JJBBXX_L2_wHAXPI059581-29_1_(paired)_contig_187178:300-523|+	N/A	9|LP161083-1_R1_(paired)_trimmed_(paired)_contig_229837:318-335|+	13|FCHL5H3BBXX_L3_wHAXPI062220-17_1_(paired)_contig_57579:121-146|+	N/A	1.7	0.4	0.98	TAGTACAACAATAAATATTACTGTAGTAAAACAAAAAAATAACAATATATGGTTGCATTATAGCATGTTTGGACAAGCCGATATGTAAATAGAGTTCATT	ATATATAGTATTTACTCAAAGTCTAAGCATCCAAATTTCCGAAGTTAACAGTTCTAAAATCCTCGATCTATTGTTGTTGCAGCCTGCGATGTAAAATTTG
CPSSR_87	AC	121	12|FCHL5JJBBXX_L2_wHAXPI059581-29_1_(paired)_contig_65805:257-480|+	9|LP150221_R1_(paired)_trimmed_(paired)_contig_11100:2041-2058|+	10|LP161083-1_R1_(paired)_trimmed_(paired)_contig_188417:1190-1209|-	N/A	10|TCunknown-1_(paired)_contig_19659:3108-3127|+	1.09	0.2	0.98	AACTGCTCCCCGAAGTACTCAACCATATCATTCCTCTGCATTGAGATATTTCCACAATTAGTAGGAGACTGAGAACCTCTGTACGTCAGAAAATGTGTAT	ATAACATGTACATATTGTACCCTGTTTTTGGATCTTTAAATTCAGAACATCTATCTTAATGGTATCTCCATATGCTAACAGGCATAAAGGAAATCTCACC
CPSSR_88	AC	122	12|FCHL5JJBBXX_L2_wHAXPI059581-29_1_(paired)_contig_75281:95-318|+	5|LP150221_R1_(paired)_trimmed_(paired)_contig_112878:2136-2145|+	5|LP161083-1_R1_(paired)_trimmed_(paired)_contig_30063:597-606|+	N/A	9|TCunknown-1_(paired)_contig_35958:727-744|+	2.95	0.2	0.94	GCGGGTTCCTTTAAAGAGTTCTTGGTGGTTTGGAACGTTTTGACTTCGCATTAAGTACAGTTCCAATTAGAACAGCTAAGATTCATGTGCACTTTTACAT	CTAGGAGGAATGATTAATCCTGGTCTTATTGGTAAATGCTGCATGGTATTGGTTTTTTATGTAGGAAAGTTGTGACAGCCAAGGAGGGGGAATAGTGCAA
CPSSR_89	AC	123	13|FCHL5JJBBXX_L2_wHAXPI059581-29_1_(paired)_contig_14354:296-521|+	15|LP150221_R1_(paired)_trimmed_(paired)_contig_248239:139-168|-	18|LP161083-1_R1_(paired)_trimmed_(paired)_contig_126108:768-803|+	N/A	N/A	2.05	0.4	0.99	AGCAGCCTCCTGAACAGCATACACAAGGCCATGACTTTAGACAAAAGAGGTTAGCCATCCTTGAGTTCATATAAGATCACCTCTTACCTAAGGACAGAAA	AATGTAGCTGAAGATAATAGAACTATATATATTTATAATACATCTTGACAAACCCCCCCAACACCACATTCTAAGTACACTAAATAATGAAAGCCGGTGC
CPSSR_90	AC	124	14|FCHL5JJBBXX_L2_wHAXPI059581-29_1_(paired)_contig_202310:122-349|+	12|LP150221_R1_(paired)_trimmed_(paired)_contig_26851:2325-2348|+	N/A	14|FCHL5H3BBXX_L3_wHAXPI062220-17_1_(paired)_contig_189469:518-545|+	N/A	0.94	0.4	0.99	AAGCATATGTCAATTGTTAGGCTATTTGAAGCATTTCTTCTTCTTGCGCGGCAAAGTTTTTATGTGATCATTATCAAATTTCCGATTTGCGCATGCATGG	TCCTAGAGAGGAAATGGGGGTTGGAAAAGTTGTTAACACCATTTTTTTAACGTTCTGTTACCATAAGCTGTCCTTAGTTGGACTTTCCTATGCTAGATTC
CPSSR_91	AC	127	6|FCHL5JJBBXX_L2_wHAXPI059581-29_1_(paired)_contig_107767:435-646|+	4|LP150221_R1_(paired)_trimmed_(paired)_contig_56002:1971-1978|-	N/A	4|FCHL5H3BBXX_L3_wHAXPI062220-17_1_(paired)_contig_188083:259-266|-	N/A	0.94	0.4	0.98	TCAAAAGTATCAAATAGTCATCAATGTCTTTTTACTCTCTGCAGACCCAATCTTTCGCTTTCATCTTTCCTATTTTTCTGCTTCATAATCACACAAATCA	ATATACATGTATAGATATAGAGTGAGAAAGAAACAATAATGGGCAATATACATACCCAAATTACCAATGCTAGAGACATAGACTTTTCCAACAGATGGGA
CPSSR_92	AC	129	6|FCHL5JJBBXX_L2_wHAXPI059581-29_1_(paired)_contig_109886:1499-1710|+	8|LP150221_R1_(paired)_trimmed_(paired)_contig_41193:631-646|-	N/A	4|FCHL5H3BBXX_L3_wHAXPI062220-17_1_(paired)_contig_268094:1008-1015|+	N/A	1.63	0.4	0.97	TTATTATTCCAAGGATCACGAAAATTTATTTAGTAATTTGTTTTTTGTTATGCTAATCATCTTTATCAACACAGTACACGCCTGGTTGAGTAGCAAAAAA	CTGGTTTGAAGTCAAGATGTCCTCATTTTTGGCTAGTTGCATGGAGGAAATTAGTTATCAGTCTTATAAATGTGAAAGGTATTAGATTTGTAACTTATGT
CPSSR_93	AC	130	6|FCHL5JJBBXX_L2_wHAXPI059581-29_1_(paired)_contig_114174:434-645|+	6|LP150221_R1_(paired)_trimmed_(paired)_contig_148699:903-914|+	6|LP161083-1_R1_(paired)_trimmed_(paired)_contig_229042:122-133|-	4|FCHL5H3BBXX_L3_wHAXPI062220-17_1_(paired)_contig_7482:1645-1652|-	10|TCunknown-1_(paired)_contig_51774:1040-1059|+	1.96	0	0.97	ACTTATCTCTTTTGGAAAGGAAGTAGCTGGGGCACATTCAAGCAAGATTGAGAGGATAGATTTTAGGGTAATCTCTTTCTCTCTCTCTTTGTATATATAT	AAATATCATCAATGAATGAGTTGGGGTGTCGGTTTGCATGTGAATTTACTCTTGTAGTCAATTGAACCTTGCTAAATATCGCCAGTTAATATTATGCAGT
CPSSR_94	AC	132	6|FCHL5JJBBXX_L2_wHAXPI059581-29_1_(paired)_contig_122240:261-472|+	6|LP150221_R1_(paired)_trimmed_(paired)_contig_149674:1230-1241|+	6|LP161083-1_R1_(paired)_trimmed_(paired)_contig_94949:1374-1385|+	5|FCHL5H3BBXX_L3_wHAXPI062220-17_1_(paired)_contig_142367:932-941|-	N/A	0.43	0.2	0.99	CTCAAGATACGGAAAGTCCAAGTGCATTAATCAAAACCGCAAAATGGTTTACAAGGAGTACAATCTCAGAACCTGTAGAAACTAAATAATTCTTACAAAG	ATTTCTGCCAAATTTAGCCCTAGTCATGCCCGAACTGAATTTCCTTCCAAAACTCTCTATTTTAATCTTTCCCTACACTCTATGGCCTCAGAACCTATGC
CPSSR_95	AC	133	6|FCHL5JJBBXX_L2_wHAXPI059581-29_1_(paired)_contig_125060:922-1133|+	N/A	3|LP161083-1_R1_(paired)_trimmed_(paired)_contig_194870:701-706|-	4|FCHL5H3BBXX_L3_wHAXPI062220-17_1_(paired)_contig_231980:395-402|-	N/A	1.25	0.4	0.98	TTGCACAATGTAATACATATCACTCTTATCATGGGGATCTTGGTTTGAACTTTGAACTTCCTCTGTTTCTCTGACCATCCATAACTATAGCCAAAAAATA	CCTAACTTCCCACCGGCCTCCGGAAAGAAAAATTGGCAGCCTTTAGTAGTCATCACCCTCTTTTTTTTTGGAAAAGTCTGAGCATCCTGTTGAAGTGGAA
CPSSR_96	AC	136	6|FCHL5JJBBXX_L2_wHAXPI059581-29_1_(paired)_contig_137953:450-661|+	6|LP150221_R1_(paired)_trimmed_(paired)_contig_159685:390-401|-	6|LP161083-1_R1_(paired)_trimmed_(paired)_contig_256446:586-597|-	7|FCHL5H3BBXX_L3_wHAXPI062220-17_1_(paired)_contig_115663:253-266|-	N/A	0.43	0.2	1	TGGGGAAACTTTTAGGGTACATGCATGTGCATCAAAGTGCACTGATTGTGTAGACTGACTGCTTGGCCAAAAAAAAGAAAGAAAAGAAAGTGTAGACTGG	TTGCTTATGCTCGTGTACTGGGTTGACTGTCCTTGTGGACCTTGCAGGCCTATTTGGTAGTGGACCCTTTGAGCCTGTTGATGGCTTAGATGCAAATGGG
CPSSR_97	AC	137	6|FCHL5JJBBXX_L2_wHAXPI059581-29_1_(paired)_contig_139130:952-1163|+	7|LP150221_R1_(paired)_trimmed_(paired)_contig_146598:906-919|-	7|LP161083-1_R1_(paired)_trimmed_(paired)_contig_88915:865-878|+	8|FCHL5H3BBXX_L3_wHAXPI062220-17_1_(paired)_contig_217015:97-112|-	N/A	0.71	0.2	0.98	ATGAAGACAGGAACTGCTATAATTCCTCCAACAAATTATTCACCTATGTTTGCCAAATATAAATTCTGGAAGTGCGTAAGTATAAGGCACATGTGCTAGT	GATGAATTTCTAACACTTAAAAGGGAATCATCTTTGATAAATAGTGACCTGAAAGTGACAGTATAATGTTTAATTGTACTCTGGAGGCAGTTATTTTCCA
CPSSR_98	AC	140	6|FCHL5JJBBXX_L2_wHAXPI059581-29_1_(paired)_contig_168280:183-394|+	6|LP150221_R1_(paired)_trimmed_(paired)_contig_49383:822-833|+	N/A	7|FCHL5H3BBXX_L3_wHAXPI062220-17_1_(paired)_contig_150575:181-194|+	N/A	0.47	0.4	0.97	TTAGAAAAGATACCAAAAAAAATCATTAACCATGGTTAAGCATTCATGGGGTTGGCGCCCATATATAAACCACTCCATAGCCCAAACAGTGACACACAAA	CAACGAGAAAGCTCGTGAAAAATGCTGTGTGCACAGAAAGAAATGGAGCACAATTCCTCGTAATCTTCGCATAGACAGAAATGGAGCCCAACACTCTGAT
CPSSR_99	AC	141	6|FCHL5JJBBXX_L2_wHAXPI059581-29_1_(paired)_contig_18589:860-1071|+	6|LP150221_R1_(paired)_trimmed_(paired)_contig_151592:767-778|+	7|LP161083-1_R1_(paired)_trimmed_(paired)_contig_99143:314-327|+	6|FCHL5H3BBXX_L3_wHAXPI062220-17_1_(paired)_contig_39713:131-142|+	N/A	0.43	0.2	0.99	CCAAAACCAATACACCAGTCCTTGAATTGATTTCTTAACTTCTAGATGCCCAAGCAATTAGATTAGTACTAACCTAGTTGGCCATCAAGCTTTAAAATAT	ATAAATTAATCCAAAGTAAGCGCAGTCCATTATCTAATGTGAGTTAGGCAAGCACTTCCCCCTATAGTAATTGGTTTAATTAATGTCACTCACTTGAACC
CPSSR_100	AC	143	6|FCHL5JJBBXX_L2_wHAXPI059581-29_1_(paired)_contig_190605:236-447|+	6|LP150221_R1_(paired)_trimmed_(paired)_contig_25400:878-889|+	7|LP161083-1_R1_(paired)_trimmed_(paired)_contig_23293:1322-1335|+	N/A	N/A	0.47	0.4	0.99	GGCATGCTTCTGAAAATACTCGATTTGAGTATCAATGATGTATAAATCACCCTATACCCTTACTATTGCAATCTAGAAGTAATAAATCGTTGTGTGTACT	ATATATGGCTTAGGAACAATCAACGTATTTTTTGCACATTTTTTCTTGGCATATACTATAAGTCTTGGATCACCCTAGAAAGAACGATCCATAAAAGAGA
CPSSR_101	AC	144	6|FCHL5JJBBXX_L2_wHAXPI059581-29_1_(paired)_contig_196582:417-628|+	7|LP150221_R1_(paired)_trimmed_(paired)_contig_170451:1385-1398|-	7|LP161083-1_R1_(paired)_trimmed_(paired)_contig_262053:341-354|-	N/A	N/A	0.47	0.4	1	GCAGTTATGAAGGTCAGTGACTTAGTCTGGTTGACACATATTGTCTCTTTACTTGATCCAGCACTTTAATTCAGTACTGTTTGCTAAAGAGAACTTGCCT	ATGCTTGCCAATCTCCATTGTGCCAGTTGCATTACATTTTACGTCATGCCCTCTGTATAGGTTTGAAGTATCCTTTTTTCTTCTTCTAGGAAATGCTAAG
CPSSR_102	AC	145	6|FCHL5JJBBXX_L2_wHAXPI059581-29_1_(paired)_contig_197072:154-365|+	N/A	N/A	5|FCHL5H3BBXX_L3_wHAXPI062220-17_1_(paired)_contig_103491:139-148|+	6|TCunknown-1_(paired)_contig_135873:272-283|+	0.47	0.4	1	AAATGCTAGTCTATCCTCCTTCCAAGTGTACCAAAAAACTGCCAATGGAAAGACCTTCCACATTTTGAGCTGTGGTTAGCAGCTTAGCATATATTTATAT	TCACAGAGATAAATTTAGTAATTTATGTTGTAAATGGATTGCTCAACAGCTCAAATAATAAACTTGGCATCAGTTTCAAATCGAATGTTTTGTGTAGGTG
CPSSR_103	AC	148	6|FCHL5JJBBXX_L2_wHAXPI059581-29_1_(paired)_contig_226578:53-264|+	8|LP150221_R1_(paired)_trimmed_(paired)_contig_118069:1278-1293|+	5|LP161083-1_R1_(paired)_trimmed_(paired)_contig_158480:1589-1598|-	N/A	N/A	1.25	0.4	1	AAATATTTCCTAGGAGAATGTTGAATCTTATTGAAAACCCATAGTTGTAACACCTTAATTTTGGAAGAATCTTACACAAATCTTTATCTCTCTCTCACTT	AACCACTTTTTATGTGGCATGTGCTATACACTTTTTAAACATTTGGATGGTACTTATTAGAGAATCAACCAAAGAGAGACATGCACTATTGTCCATCCAA
CPSSR_104	AC	149	6|FCHL5JJBBXX_L2_wHAXPI059581-29_1_(paired)_contig_247287:264-475|+	4|LP150221_R1_(paired)_trimmed_(paired)_contig_50846:2623-2630|+	4|LP161083-1_R1_(paired)_trimmed_(paired)_contig_239320:191-198|-	N/A	N/A	0.94	0.4	0.98	GGAATGTTCGTTTTCGTCTTCGTTCTTCGAGTTGTGTACACAGATGAAGTACACCCCATTTTGTTTTTGCAATTGATTTGTTTCGAACATAACATCCTAT	AAAAGCCTATCAAGAAGAGTGCAAAATTTTCAAAACTATTTTGTGTGTTGAAGAAAGCAATGAGATGAGACTGTTGGAACTCTGTAACATGAAGCCAATA
CPSSR_105	AC	150	6|FCHL5JJBBXX_L2_wHAXPI059581-29_1_(paired)_contig_25099:547-758|+	7|LP150221_R1_(paired)_trimmed_(paired)_contig_63697:410-423|+	5|LP161083-1_R1_(paired)_trimmed_(paired)_contig_56801:3636-3645|-	6|FCHL5H3BBXX_L3_wHAXPI062220-17_1_(paired)_contig_83734:197-208|-	6|TCunknown-1_(paired)_contig_83070:106-117|-	0.63	0	1	CAACCCCATTAACCATCACAAACTCTAGACATGCCAACAAATGATTAAATGGACTTATTTTAACAGTCCAGGAAACAATGCTTAGATATACCCAACAGCG	ATAAAGAAACATATATTAACAAAGGGTGCTCAATAACACTACACTTACAACTCATTACCTTGAAACCACATTTCAAACTGTCAATGCCACAATCAAGATT
CPSSR_106	AC	152	6|FCHL5JJBBXX_L2_wHAXPI059581-29_1_(paired)_contig_3461:539-750|+	3|LP150221_R1_(paired)_trimmed_(paired)_contig_29154:893-898|-	4|LP161083-1_R1_(paired)_trimmed_(paired)_contig_83560:1708-1715|+	N/A	4|TCunknown-1_(paired)_contig_17257:1104-1111|+	1.09	0.2	0.98	TTGGTAGGTAAAAGATAGAGAATATGGACAAGACTAGGGAGTTGGGAGAGACAGGCACAGCAGGCCCAACTAAGTGTGTGGTTTGGTTGGTTACTAAATG	TGTGTCTAGTGTCTACACGAGACATTTACCACTCTGGACATGTGAAGTTTGTCTCTTAAAAATTAAGAATTGCTCTGCTTTTTAAGAAAAAGAGCTTTCA
CPSSR_107	AC	153	6|FCHL5JJBBXX_L2_wHAXPI059581-29_1_(paired)_contig_4208:3032-3243|+	6|LP150221_R1_(paired)_trimmed_(paired)_contig_200068:1098-1109|-	N/A	7|FCHL5H3BBXX_L3_wHAXPI062220-17_1_(paired)_contig_154251:595-608|-	N/A	0.47	0.4	0.99	TTTTCATTTTTGTTTTTGTTACATTTCTTTTAATATTATATGATATCTAATTACTTTTTTCCCATATATATAGTTTACAAAACTTAAGACGTGCGCGCGG	ATATATATAATAGTAATAATAAAATAGCTTGACCTTTGGAATAGTAATGAATAGTTACAATTTTTGTGTCTTGAGTGATAAGCCATTCAAAATTTGAATT
CPSSR_108	AC	154	6|FCHL5JJBBXX_L2_wHAXPI059581-29_1_(paired)_contig_43017:499-710|+	6|LP150221_R1_(paired)_trimmed_(paired)_contig_34936:3794-3805|-	N/A	9|FCHL5H3BBXX_L3_wHAXPI062220-17_1_(paired)_contig_9977:564-581|+	N/A	1.41	0.4	1	TTTAATGAAAATCTCCTTGTCTGTTCTATGTATCCGCGGAACACTGTTTCATTGATATTAACAGGACTATTAATGTCCCAAATTGCTAGCTCTTTCTCAA	AGTATAGGTGCAGGCCTAATTTTCATATACAATGTGATCATATTTAGTTGTGATTGGGCAACAAACTTCTTACCTAGATTATATTGTGTCTACCGGCAGG
CPSSR_109	AC	155	6|FCHL5JJBBXX_L2_wHAXPI059581-29_1_(paired)_contig_44975:568-779|+	7|LP150221_R1_(paired)_trimmed_(paired)_contig_29453:961-974|-	8|LP161083-1_R1_(paired)_trimmed_(paired)_contig_170354:162-177|-	5|FCHL5H3BBXX_L3_wHAXPI062220-17_1_(paired)_contig_150118:305-314|+	N/A	1.12	0.2	0.96	TTAACTATTAAGGAGTTGAACCCATGACCTTGACATCGACACTGGAGTGTCTTGCCATTCAACTTATATGTATTATGGAGGAAGACATCTCTTGCATACA	AAAAAACATTAACTATAATAATAAGAAATTAAGAATAATAGATTGTTTGACCCTTTCGAAACAAAGACAAACTCAACATATTATATATAGGTATGTAGCA
CPSSR_110	AC	156	6|FCHL5JJBBXX_L2_wHAXPI059581-29_1_(paired)_contig_49929:292-503|+	7|LP150221_R1_(paired)_trimmed_(paired)_contig_2846:6175-6188|-	6|LP161083-1_R1_(paired)_trimmed_(paired)_contig_106112:373-384|+	8|FCHL5H3BBXX_L3_wHAXPI062220-17_1_(paired)_contig_232144:322-337|+	N/A	0.83	0.2	0.99	TATAGAAAATGTCAATTTGATGTCTTCCTTGAGTCAACTTGTTATATTTTTTTTGTATAATTGAGTCAACTTGTTTTTATCATCATTATCAAAAAAGAAA	ATGCGCACATATGCAGAGCAAACTGAGCCTTCAAAACACACCTCTCTCACATTCTATATTGACAAAGTCGAGATATGTCTTCTTGACATTTTTAATTTGT
CPSSR_111	AC	157	6|FCHL5JJBBXX_L2_wHAXPI059581-29_1_(paired)_contig_526:4300-4511|+	N/A	5|LP161083-1_R1_(paired)_trimmed_(paired)_contig_88717:422-431|+	3|FCHL5H3BBXX_L3_wHAXPI062220-17_1_(paired)_contig_90767:471-476|+	N/A	1.25	0.4	0.99	TCTCGGAAAACAAAAGCAAAAAAAGCTACAGTAGACATGCCATTGTTAGCAGAAATTATAAAAAATAGCTTCCCCTTGAAAAGATCCAGAATAAATATAA	ATATAATATGTAGAAATATAGAAACACCCAAAGAAAGAACCAAAGACATACAAATGTGTGTAGCTAGACAGTGCTCAATAAATAATACGATCATACACCA
CPSSR_112	AC	158	6|FCHL5JJBBXX_L2_wHAXPI059581-29_1_(paired)_contig_63335:545-756|+	6|LP150221_R1_(paired)_trimmed_(paired)_contig_4434:3687-3698|-	4|LP161083-1_R1_(paired)_trimmed_(paired)_contig_1501:3610-3617|-	6|FCHL5H3BBXX_L3_wHAXPI062220-17_1_(paired)_contig_2950:1435-1446|+	N/A	0.87	0.2	0.99	GAGAGTGGACTGTTCCATTGAGACTGCAATTATTCCAGTTAGTCCTAACATTCTGGCTTCTATGATGATGGATGTGGTGAGTTTACTAATTTTACTGTCA	AACAGAAAAAAGAAAAATGACTGCCCTTTTCATTAATGGACTTGCCTAAGAAGATATGGCTTAAGATTCATGTATATAAAGTTTCACACTAATAATTTGT
CPSSR_113	AC	159	6|FCHL5JJBBXX_L2_wHAXPI059581-29_1_(paired)_contig_66469:615-826|+	5|LP150221_R1_(paired)_trimmed_(paired)_contig_128613:634-643|+	5|LP161083-1_R1_(paired)_trimmed_(paired)_contig_78175:245-254|-	N/A	N/A	0.47	0.4	0.99	GGCATTTCCTAATTTCCATTGTTTCGGGGAATCCAATGTGCACAAATTTAGTCCGGCCTCGAGATGCCTTCAGGCCAGAATACAATATTCCAGCTATAAT	ATATATATATTGTGATGAGTGAGAGTGACAATAAAATATTCTGTGGTGATGTACGTGCATGCCATTTTCCTTTTCTTCTGCACCCCTTTCAGGTTTTTGA
CPSSR_114	AC	160	6|FCHL5JJBBXX_L2_wHAXPI059581-29_1_(paired)_contig_69553:496-707|+	3|LP150221_R1_(paired)_trimmed_(paired)_contig_23983:3304-3309|-	N/A	3|FCHL5H3BBXX_L3_wHAXPI062220-17_1_(paired)_contig_100498:464-469|-	N/A	1.41	0.4	0.96	AAATTGCAAACTGGTCTTTTTCGGGTCGGGTTAGGGGTTTTCAAAACCAAACCAAACGGAAAATCGAACCGAATTCAAACCAAATTATTAATAATTATAT	ATATATATGCCATATGCATATGTGTACTTTTTATTAATTATACAACTTATTATCATACACCTACTACCATGGGAACAAATCTCTAACAAAGTAATTTTTG
CPSSR_115	AC	161	6|FCHL5JJBBXX_L2_wHAXPI059581-29_1_(paired)_contig_70703:3768-3979|+	5|LP150221_R1_(paired)_trimmed_(paired)_contig_173939:295-304|+	N/A	N/A	4|TCunknown-1_(paired)_contig_90978:342-349|-	0.82	0.4	0.99	TGTCATCATCGCTCTCTTCCTTTGCTTCTTCCTGCAATAACAATTAGGTATGCATCAAAATGCCATCCAATCAAACTAATAGTAACCACCCACATTCAAA	GCGCATGATCAATAGCCAAAACTAGTAAGTACATAAGTCTTGACTATTACCTTCTTTTCCTCGGCTGCTGGTGCAGCGGCAACAGCAGGGGCTGCCCCAC
CPSSR_116	AC	162	6|FCHL5JJBBXX_L2_wHAXPI059581-29_1_(paired)_contig_80014:229-440|+	7|LP150221_R1_(paired)_trimmed_(paired)_contig_66745:114-127|+	8|LP161083-1_R1_(paired)_trimmed_(paired)_contig_132977:115-130|-	N/A	N/A	0.82	0.4	0.98	TATATTCCATGTATTATTGACATGATTAAGGCTAGAATCTTGTCCAAACATGGGTTTTGTTTCATAGAAAGATTTTTTGCTTAAGATACAAGCATACCAA	AATACAAAACATATTGTGTAGTTTACAAGTTGTGTGGCTTGGGATTTACAGTCCAACATACAAGTCATACCCAATGGCGGAACAGGGGGTGGCTGAGTTA
CPSSR_117	AC	163	6|FCHL5JJBBXX_L2_wHAXPI059581-29_1_(paired)_contig_83874:571-782|+	7|LP150221_R1_(paired)_trimmed_(paired)_contig_174643:419-432|+	N/A	6|FCHL5H3BBXX_L3_wHAXPI062220-17_1_(paired)_contig_77294:703-714|+	N/A	0.47	0.4	0.99	GTCATGACGTTAAATTATACGGTCATTATTGACACGACTACATGTAACATTGCGTTACGGCCACCAACTAAACAACTCTCTTAAGTCTCAACAATACCAA	GTAGAAGGTGTGCACCATATAGCTGTCTCCATGAAATCCTCAATTATATTTGTTTTGTTCAAACTTTTGAAAAAAATAATATACTACCATTTGTTGACTC
CPSSR_118	AC	166	7|FCHL5JJBBXX_L2_wHAXPI059581-29_1_(paired)_contig_101252:303-516|+	9|LP150221_R1_(paired)_trimmed_(paired)_contig_68874:845-862|-	9|LP161083-1_R1_(paired)_trimmed_(paired)_contig_115275:1366-1383|-	N/A	N/A	0.94	0.4	0.99	GGAAAGTTTTTTCATACCCCTCTTACCTTCTGGAGAAGTAATCACTGTCAATGGAAAACATCAGAAAGAGAGACAGATGTAAGGGGAAAATGAGGGAAAG	ATAATGAAACAAGTTAATGAAGAGAACCTCCTCCAAATTCATTAATAGATGGGCTTTCTTCTATAGAGTATGTGAACCTCTCACACATCCTCTGAAGAGT
CPSSR_119	AC	169	7|FCHL5JJBBXX_L2_wHAXPI059581-29_1_(paired)_contig_118589:172-385|+	3|LP150221_R1_(paired)_trimmed_(paired)_contig_10083:469-474|+	3|LP161083-1_R1_(paired)_trimmed_(paired)_contig_143821:247-252|+	N/A	N/A	1.89	0.4	0.98	GCAAGCTTGCAATGCGTAAAAATTCATGTATTTATTTTTCAACTCATCCACCAATACAGCTCGCCAGCTCGGTACATCATGGTGTCAACATATGTATTAT	ATACATATATGTATGTATGTGAATGTATTTTTAAGTACTGCTTCTAGCCTCACCAATATTACCAACAAATAACAGCCAGTGAGTTTCATATCTATCAAAC
CPSSR_120	AC	171	7|FCHL5JJBBXX_L2_wHAXPI059581-29_1_(paired)_contig_17447:251-464|+	N/A	8|LP161083-1_R1_(paired)_trimmed_(paired)_contig_258074:230-245|-	6|FCHL5H3BBXX_L3_wHAXPI062220-17_1_(paired)_contig_43530:680-691|-	N/A	0.82	0.4	0.98	ACTAGTACGTGAGTTTCCTGTGGTCACAAGATGAACGAAACCAATTTAAAAGATCCCAAAATATTCCTATAATGATGCTAACTTCAACATATATATACAT	ATGTACAACAAAAAAGGTATTAGCCACGAACTTATTAGGTCCGAAAAAATGTGAAGATATTCATGTGGTTTATCTAGGTGGATAATTCGGTTCACTATTA
CPSSR_121	AC	172	7|FCHL5JJBBXX_L2_wHAXPI059581-29_1_(paired)_contig_176649:740-953|+	5|LP150221_R1_(paired)_trimmed_(paired)_contig_114682:606-615|-	5|LP161083-1_R1_(paired)_trimmed_(paired)_contig_70933:686-695|+	N/A	N/A	0.94	0.4	0.99	GATAAGAACATTGAAGCTTGATCAGACATGAACTTCTTCTTGACTTGGGTGGTAAAAGGTGCAGAAAGAAACCAATAGAATCATACTTCAAATCCTAGCT	AGGTCTACAACGCCGCCAGATATTGAGCAGAACACATATCTCAGACTTGTCAAAATCTGTAAATTTTATAGATTTACAAAAAAATTGATCAAAGAAGTTG
CPSSR_122	AC	173	7|FCHL5JJBBXX_L2_wHAXPI059581-29_1_(paired)_contig_192338:596-809|+	7|LP150221_R1_(paired)_trimmed_(paired)_contig_132507:1538-1551|+	7|LP161083-1_R1_(paired)_trimmed_(paired)_contig_82941:131-144|+	4|FCHL5H3BBXX_L3_wHAXPI062220-17_1_(paired)_contig_139753:1206-1213|-	N/A	1.3	0.2	0.97	TGAACATCCACACAAGCAAGATAACAAATTGTTAGAAGGCAGAGACCATTATGCAGAGGCTGCATATCTAGATAACACATTTACACAGATAAGCATATGG	AAGTAGCAACACCCGTATGTTAAGATATCTAGAATTAGTTTTAAAGTTTTTAATATTTATTTATTTTTAATTTTGACAGTCTGAAAAAATGAGTATCGCG
CPSSR_123	AC	174	7|FCHL5JJBBXX_L2_wHAXPI059581-29_1_(paired)_contig_223439:38-251|+	6|LP150221_R1_(paired)_trimmed_(paired)_contig_20747:153-164|+	5|LP161083-1_R1_(paired)_trimmed_(paired)_contig_98226:142-151|+	5|FCHL5H3BBXX_L3_wHAXPI062220-17_1_(paired)_contig_159885:161-170|+	5|TCunknown-1_(paired)_contig_99392:153-162|-	0.8	0	0.99	TCTTAGTCTTAGAGAACCCGTAATGTTTAGTATGTGTAATGTGTCCAATCTCATGACGGATAATAAGAGGATAAATTTTTTTATTCGGCACTATACTCAT	GTATACCTGGTCCCTATGGAACTCGAACTTGGGTTGTGGGGTAAACAATCCCGTCGTGTGCTTTGGGACACATGAAATGAAAATGAGAATTTGAACTCAT
CPSSR_124	AC	175	7|FCHL5JJBBXX_L2_wHAXPI059581-29_1_(paired)_contig_223555:238-451|+	5|LP150221_R1_(paired)_trimmed_(paired)_contig_93014:827-836|+	5|LP161083-1_R1_(paired)_trimmed_(paired)_contig_174503:679-688|-	5|FCHL5H3BBXX_L3_wHAXPI062220-17_1_(paired)_contig_98777:488-497|-	N/A	0.87	0.2	0.98	CTTAAGAACACATCACAACAAGTTAGCCAAAGCTCCAAATTTGGAAAAAGGAGCTCAGACTTCCACAGAGAACATCCAATAAATACTAATATACATACAT	ATACATATGTATGCAAGTATAAACATACACATATATAAGGGAGATGTAGAAGAATTATGTAGTACTTCATCTGATATTCCAAAAGGTCTTGGTCTCTTCA
CPSSR_125	AC	176	7|FCHL5JJBBXX_L2_wHAXPI059581-29_1_(paired)_contig_23083:251-464|+	N/A	N/A	6|FCHL5H3BBXX_L3_wHAXPI062220-17_1_(paired)_contig_326938:124-135|+	5|TCunknown-1_(paired)_contig_151156:582-591|-	0.82	0.4	1	GAGAGAGCACAACCAAAACAATCCAACCCCACAACAACTATATCCCAATGAAATCGAGTCCTAAAAGAACCCATACGAGTCACGGAACCTATACATCTGA	CAACACATTTGAACACATACACCCAAACCCACACAGATGAACACACACCCAAACCCATCCAACCACACACCCACAAACACACAGATGCACACACACAACC
CPSSR_126	AC	177	7|FCHL5JJBBXX_L2_wHAXPI059581-29_1_(paired)_contig_233606:115-328|+	8|LP150221_R1_(paired)_trimmed_(paired)_contig_51741:180-195|+	8|LP161083-1_R1_(paired)_trimmed_(paired)_contig_44175:343-358|+	N/A	N/A	0.47	0.4	0.99	TGTCTCTAAAAATTCACCACCATAATTATCTGAAATGCTGCAGAAAAGGCAGTACTAGGTACAAAGCAGGAAACTTCTTCAAAGAACACAACTGGAGCAA	AGACAGACACACAAGTTATCATCTTTTTTGCTTGGTAGAAAGCATAGCAAGCATAGAATCGTAAAATAGCTGCGCAATACCAACACTCCTCTGACTTGTT
CPSSR_127	AC	179	7|FCHL5JJBBXX_L2_wHAXPI059581-29_1_(paired)_contig_26133:91-304|+	N/A	6|LP161083-1_R1_(paired)_trimmed_(paired)_contig_15555:379-390|+	6|FCHL5H3BBXX_L3_wHAXPI062220-17_1_(paired)_contig_229839:115-126|+	N/A	0.47	0.4	1	CACTTCTTGACACAATGCTGGTCATCCATACGCTTATATTGTACAAATTTTGTGTTCTTGTATGACTCTGCGCTTGTGTGATGTGTAAACATGCAGGCCT	TCTTATGTCAAAGTCTCTATTTCTAGATTTTGGTCATCGGCTGAGTGTCTTTTTTGGAACTGGATTGATGCATAATGACTAACAATGATTGTACTATTTG
CPSSR_128	AC	181	7|FCHL5JJBBXX_L2_wHAXPI059581-29_1_(paired)_contig_27299:113-326|+	9|LP150221_R1_(paired)_trimmed_(paired)_contig_106078:1861-1878|+	11|LP161083-1_R1_(paired)_trimmed_(paired)_contig_215726:134-155|+	N/A	N/A	1.63	0.4	0.99	ACATCCCCTTTGGCCCTCCCATGATTTTTTGTTCTCTCTTAAAAAGAGACCATGCCAAAGCATATGGAGTAGTCATGGCCCTGGAAGCAAGTAGCCCCAT	TTACACAAAAAAATGCAAAAAGAGAAGGGGCTCACTCACCATCATCTCTATACTTTTGTTAGTCTCTTTTTTGAGTCCTTTATTACAAGCTTTTTTTTAT
CPSSR_129	AC	182	7|FCHL5JJBBXX_L2_wHAXPI059581-29_1_(paired)_contig_295485:124-337|+	6|LP150221_R1_(paired)_trimmed_(paired)_contig_64359:249-260|+	6|LP161083-1_R1_(paired)_trimmed_(paired)_contig_183048:253-264|+	N/A	10|TCunknown-1_(paired)_contig_27351:559-578|-	1.64	0.2	0.98	AAGACTCTTGATTGCATTTAGTTGCTGCCATCATAAAGTAGGCTTCATGATTTTGGGCGATAGGACTCCATCTTTCCCATATTCACTTTGAGGTTTGAAA	ATATGAAGTAACTAATTGATTGCATTAAGTACATGTTTATCCATAGATTCTTATCCAAAACTATCCTTTACGAAAATGATGGACTATGTTAATGTAGAAA
CPSSR_130	AC	184	7|FCHL5JJBBXX_L2_wHAXPI059581-29_1_(paired)_contig_297869:193-406|+	6|LP150221_R1_(paired)_trimmed_(paired)_contig_1351:429-440|-	N/A	6|FCHL5H3BBXX_L3_wHAXPI062220-17_1_(paired)_contig_294360:333-344|+	N/A	0.47	0.4	0.99	ATAAACATGCTAGCCTCCAACCACAGCGCCAACTCCAACCTCTTTCATTTCAACAAGATGGAATTTCAGTTGTATAATTTAATAAATAAATATATGTGAA	ATATATATGTTTGTATATTATCATTACCATATTAATGTGGTTTAGAATTTCATTACCCATACACCAAATGGATTGAATGCACGTTGTTGTCTAATAGACT
CPSSR_131	AC	186	7|FCHL5JJBBXX_L2_wHAXPI059581-29_1_(paired)_contig_51740:751-964|+	6|LP150221_R1_(paired)_trimmed_(paired)_contig_125140:1024-1035|+	6|LP161083-1_R1_(paired)_trimmed_(paired)_contig_233714:260-271|+	N/A	N/A	0.47	0.4	1	ATGATTTCGATGATGATGACAGCGAGATTAATTCCGCTAATCATATCTTCTCTACTGTTCGAATGAAATCATATATTCTCTACTGTTTATATATATACAT	ATATTATAACGTTCCTAAACTACCCTCTTACACATTCAACTGGTGTCAAATATAGTGGTTGGGTGTAGGCTCTTGTTGGTGGAGGTTTGACCTATGAGAC
CPSSR_132	AC	187	7|FCHL5JJBBXX_L2_wHAXPI059581-29_1_(paired)_contig_60219:544-757|+	7|LP150221_R1_(paired)_trimmed_(paired)_contig_34347:1345-1358|+	N/A	N/A	6|TCunknown-1_(paired)_contig_33022:2087-2098|-	0.47	0.4	0.99	GTCAAGTAACCAAAGTATTTGTGGCCATTTCATTGTTCCCAAATAAGTTAGGCCACTAGACATGTCCTCCAACCTCCCCCTCTCTTCCCCATCCCCCCGT	TCATTCACTCACTGCAGAAACAAAGAAACAATGAAGAAACTTCTATTCCTTTTTGCCTCCAATAAAACTAAGCAGCTTCTCCATCTAACACATGACACAT
CPSSR_133	AC	188	7|FCHL5JJBBXX_L2_wHAXPI059581-29_1_(paired)_contig_84917:104-317|+	N/A	7|LP161083-1_R1_(paired)_trimmed_(paired)_contig_62176:1401-1414|-	7|FCHL5H3BBXX_L3_wHAXPI062220-17_1_(paired)_contig_33998:1422-1435|-	6|TCunknown-1_(paired)_contig_50535:2656-2667|-	0.43	0.2	0.99	TTCGAGAGGGGTTTTGAGTTGTAAGATCTTTCACATTATTCTTTTGTATTAGAGGACCCCTTGTCCTCTTTTATTATTAAAATGTTGTTTCCTATAACAA	AAAAAGAGGTCCAAAAGCAGAATGTGTCTACATGCAAGAAGTCTCCATGAGAGGTAAACTTTCCAAATCTCATAAATATTCAAAATCTAAAAGAGGACCA
CPSSR_134	AC	189	7|FCHL5JJBBXX_L2_wHAXPI059581-29_1_(paired)_contig_85523:498-711|+	7|LP150221_R1_(paired)_trimmed_(paired)_contig_85838:98-111|+	6|LP161083-1_R1_(paired)_trimmed_(paired)_contig_22645:1656-1667|-	N/A	8|TCunknown-1_(paired)_contig_41406:2377-2392|+	0.71	0.2	0.99	ATTAGTGTGTGTTTTATCTTGTTTTGAGCTTTAAAAGTGCCAACGCGGAAAATAGCACTCAAAAGTAAGCAAACAAGTTCTTGACTAGTAGTTTGTAGGA	AAACAGAGAGACAAACTTTGAACACTTCAACACTTGATTATATTGAAGGACATGGCACACATCACGGATCTCCTATAATTGAGATTGATTCAACCCCAAG
CPSSR_135	AC	191	7|FCHL5JJBBXX_L2_wHAXPI059581-29_1_(paired)_contig_95291:505-718|+	N/A	N/A	4|FCHL5H3BBXX_L3_wHAXPI062220-17_1_(paired)_contig_225665:212-219|+	11|TCunknown-1_(paired)_contig_146320:320-341|+	2.87	0.4	1	GAAGGCACCATGGCAAGGGGTATGTACTGCCTAATTATTTTTATCTGCAGAAAAATGATTATTAATGCAAATTTTCTGCCATTTCCCTCACACCACCTGG	AATATATTGCGCTATCAAATTCTCTCATTAAAGAATCTGTAGTTGTGTTATAGAAGTCACCATATACTTCTAGATCTTGTTGTCAGTGGTCACTAATTTA
CPSSR_136	AC	192	8|FCHL5JJBBXX_L2_wHAXPI059581-29_1_(paired)_contig_111051:466-681|+	6|LP150221_R1_(paired)_trimmed_(paired)_contig_86046:1178-1189|+	6|LP161083-1_R1_(paired)_trimmed_(paired)_contig_2614:1544-1555|+	6|FCHL5H3BBXX_L3_wHAXPI062220-17_1_(paired)_contig_272608:125-136|-	N/A	0.87	0.2	0.99	GCAACTATGAATTTATAATACTAATTTTCTGTTTAACTATGAGAATATCAGTATAAGGATTGATGCAACGTTTCGATATGCTTCATCATACACTTCCTTA	ATACACCAAAGAAATATAGCAGCATTGATGGCTATATTTTACAATTTCTTATTGCCCCTCTTTGGAGAAGGTGGTGTTAAAATTATCTGTTGTTTTGGAA
CPSSR_137	AC	193	8|FCHL5JJBBXX_L2_wHAXPI059581-29_1_(paired)_contig_125648:965-1180|+	5|LP150221_R1_(paired)_trimmed_(paired)_contig_28608:2021-2030|-	N/A	N/A	7|TCunknown-1_(paired)_contig_77462:1269-1282|+	1.25	0.4	0.98	CATACAAAAACCCAAACCCCCTCAGATCGAGAATTTGCTCGCCGTCGAACGGCGATCAAAAGGATGTTCCCGATTCATCAATTCCCTGCATCTCGATAAT	AACACCCAAATTCCAATCAAAATCCCTAAAAAATTCAAAAACCAAAAAAAAAGAACAAAACTTTATCCAATCAGCTCAAGACCCCCTCAAATTCAATCAC
CPSSR_138	AC	195	8|FCHL5JJBBXX_L2_wHAXPI059581-29_1_(paired)_contig_21578:542-757|+	7|LP150221_R1_(paired)_trimmed_(paired)_contig_131983:1176-1189|+	N/A	7|FCHL5H3BBXX_L3_wHAXPI062220-17_1_(paired)_contig_71767:1198-1211|-	N/A	0.47	0.4	0.99	TTAGCTGCCACTGCCACAAATATAAAACTTCAGTAATTCATACAACAGACAATATTTTAAAAGTACATCTTCAAAGGATTTCTAATACAATACTCCAAAG	GGGGAGAGAGCATACGATCTTCAACATCTTTAAGCTGGTAATAGTGGGGAGCTATCTCCACCAGCCAATCTGGCTTTAATTCAGTGACCTGCAATAGCAA
CPSSR_139	AC	197	8|FCHL5JJBBXX_L2_wHAXPI059581-29_1_(paired)_contig_242244:23-238|+	4|LP150221_R1_(paired)_trimmed_(paired)_contig_58602:910-917|-	4|LP161083-1_R1_(paired)_trimmed_(paired)_contig_20210:1642-1649|-	N/A	4|TCunknown-1_(paired)_contig_52009:1968-1975|+	1.73	0.2	0.99	CGAACAAAGCCTGCCACATGGAATAATAGTGCTTCCCTTCGTGTACAATTCCATTCGGAGGCTCAACGGGAGTTGCCATTTACCTTCAATAAAGAAAAAA	AAATACATTACATTAATGACATAACCTGTAAACAGGTCAATCCTTTGAGAATGCCATTGTAAGACATCTTATGAATGTTGTCAGAAATCGTGTTAAGTAA
CPSSR_140	AC	199	8|FCHL5JJBBXX_L2_wHAXPI059581-29_1_(paired)_contig_250053:108-323|+	8|LP150221_R1_(paired)_trimmed_(paired)_contig_64683:960-975|+	8|LP161083-1_R1_(paired)_trimmed_(paired)_contig_87259:803-818|+	9|FCHL5H3BBXX_L3_wHAXPI062220-17_1_(paired)_contig_120302:254-271|-	8|TCunknown-1_(paired)_contig_70069:145-160|-	0.4	0	0.99	CACACGCTAAATGACTATCTATATTCCTAACTTCTGTAACTCTGGTAACAGACTGTAAGATGCCGGGGAAAAAATGGTTGTTCATAAAGTACAAATTACA	GTGCACTTGGGCGAGGGTGAGCCAAATAGGATTGAGAGAAAAGGATCGCCATAGCAGCCGCACAAAAATATTGAAGCAACAGGACCAACTTTACGGAGGA
CPSSR_141	AC	200	8|FCHL5JJBBXX_L2_wHAXPI059581-29_1_(paired)_contig_262722:52-267|+	N/A	7|LP161083-1_R1_(paired)_trimmed_(paired)_contig_33651:599-612|+	7|FCHL5H3BBXX_L3_wHAXPI062220-17_1_(paired)_contig_82004:530-543|-	N/A	0.47	0.4	0.98	TCATTAAAGGCGGAGAAGTATAGGCACATGTATTTAGCATAGTAGCGTAGGAGAAAATGCTAACTTGGAGAGGAGGCATCTCTTCCTCCTCTCTTACGGT	ATGAGGTTTTGTTGAAGTTCCCACTGCTTTCAAGTGTAACAGAATTTGTATTCTCTAGTCTTGCTTTGATAAATTTAGGGATGGTTGTTGCAACAATTTG
CPSSR_142	AC	201	8|FCHL5JJBBXX_L2_wHAXPI059581-29_1_(paired)_contig_3552:540-755|+	6|LP150221_R1_(paired)_trimmed_(paired)_contig_12504:501-512|+	6|LP161083-1_R1_(paired)_trimmed_(paired)_contig_47250:438-449|-	N/A	N/A	0.94	0.4	0.98	AAGAGATCGAAGTAGAAAATATTCGAAAACTTACCCAACACCGGGACCAAAAGAGAAAGAGACGCTCATGAGGTAGAACCACTCGGACTCTAGCAAGTAT	TTATGATGGGGTTTCATTTGTGTAAGTTCTTCACACAGTTAATGTGAAGTGAAGTCTTTATGAATTGTTTAACATCTCATTTTTGTGACAACTTGTTCAA
CPSSR_143	AC	202	8|FCHL5JJBBXX_L2_wHAXPI059581-29_1_(paired)_contig_41487:830-1045|+	10|LP150221_R1_(paired)_trimmed_(paired)_contig_152569:253-272|+	9|LP161083-1_R1_(paired)_trimmed_(paired)_contig_221410:497-514|+	N/A	N/A	0.82	0.4	0.98	CATGTGCAGGTTTGACTCTTTTCAAAGTGAAACTTTGCTTGGTCTAAAATAAGTCAACTCTTTTATTCAAGGAACCTAAAATTTTCAGAAATGAACTTGT	GCACGCACACATATATGCAGTAACCCTATAGTACTGTTATTCCCCTTCAGTTTTAGTTTTTTATATATTACTATTTTTAATTTAGAAATTTGTGTATAAT
CPSSR_144	AC	203	8|FCHL5JJBBXX_L2_wHAXPI059581-29_1_(paired)_contig_4171:167-382|+	7|LP150221_R1_(paired)_trimmed_(paired)_contig_124142:191-204|-	7|LP161083-1_R1_(paired)_trimmed_(paired)_contig_176992:104-117|-	N/A	6|TCunknown-1_(paired)_contig_80387:124-135|+	0.71	0.2	0.99	CCTGCATTAATTGGGGAATATTCCTTGAATATTCTTAAAGGGGCCATACCTATTCTCATTTATTTCCTCTCTCACTACCCTCACCAACACACACACTCAT	CACATCACACAAACCCAACCCGCAGGAAAAAACCCACGTCACCTCCACCCCTTGCCCACTGCCTCCGCCATTTTCGCAGGCCATCGCAGTCGCCGGACCA
CPSSR_145	AC	204	8|FCHL5JJBBXX_L2_wHAXPI059581-29_1_(paired)_contig_49535:525-740|+	10|LP150221_R1_(paired)_trimmed_(paired)_contig_33958:465-484|+	9|LP161083-1_R1_(paired)_trimmed_(paired)_contig_86391:492-509|+	N/A	5|TCunknown-1_(paired)_contig_76326:236-245|+	1.87	0.2	0.97	ATCACTCTTATGATAATTGGAAAACAAAAAAAAAGCATAATACAATCACCTATCTCTTGAGATCCAAAATTACTCTATAAATTTTCGACATCCTGAGAAA	AACATTTTAGAACCTATGAGAAAACAAATACCTCCTCATTTCGTGTCCTATAAGTCTATATAACATATAAGCCACTCAGATATCCAATAGAATTGATCCT
CPSSR_146	AC	205	8|FCHL5JJBBXX_L2_wHAXPI059581-29_1_(paired)_contig_56943:941-1156|+	11|LP150221_R1_(paired)_trimmed_(paired)_contig_43074:526-547|+	8|LP161083-1_R1_(paired)_trimmed_(paired)_contig_17308:1150-1165|-	N/A	N/A	1.41	0.4	0.99	ACCTTGCATCTCTCTTTCGGCTTGTTCCTTGATCCTTGCATTGGTGACATAATGAGCTTGTGTATATATAAATTATATATTTATATCCTCATTAATGTAG	ATATGAGTATATAATGTGAGTCTAATGTGATTTCTCTACTTCTAGATACCAACGAATTTCCGCTACCAACAAAGTATTGAGGAAGGTCACCATGGAAGAA
CPSSR_147	AC	207	9|FCHL5JJBBXX_L2_wHAXPI059581-29_1_(paired)_contig_114711:663-880|+	6|LP150221_R1_(paired)_trimmed_(paired)_contig_14044:3709-3720|-	6|LP161083-1_R1_(paired)_trimmed_(paired)_contig_156550:1887-1898|+	6|FCHL5H3BBXX_L3_wHAXPI062220-17_1_(paired)_contig_67311:132-143|+	6|TCunknown-1_(paired)_contig_31300:1102-1113|+	1.2	0	0.99	AAGGGTGCTGCACCTTGGACTATAACTTTCCATCGTAAAATCATTTGGATTAAAGCTGCAGTACTAATGCACCTTTTTCTGACTAGGGTTTTGGTCAAAT	ATACGTTCGCTCTCTCAACTATCAAGCCTCTGATTCTCTTCATCTTTGATGGAACAAGGTGTTAGGCACTCATGTTAATTCAAAAATAAATAAATAAATC
CPSSR_148	AC	208	9|FCHL5JJBBXX_L2_wHAXPI059581-29_1_(paired)_contig_159356:86-303|+	10|LP150221_R1_(paired)_trimmed_(paired)_contig_164136:107-126|-	N/A	8|FCHL5H3BBXX_L3_wHAXPI062220-17_1_(paired)_contig_38186:585-600|+	N/A	0.82	0.4	0.98	GATGAAATGAGCTTATTTTGCTTTTAACATCTGGTGATTTTGCAATGAATTTGGTTCTAATTTCCAAGTTGCCCACTACTTAGCTAGTGAAGTTTAGAAG	ATTGAGCTCAATGAATTATGATCATCGGACCACGATATATCAAGGTAATTGTGCCTGCGAATTACGAATTCAAATGCTATGTAAACTGAACTTGGAATTC
CPSSR_149	AC	209	9|FCHL5JJBBXX_L2_wHAXPI059581-29_1_(paired)_contig_18703:668-885|+	8|LP150221_R1_(paired)_trimmed_(paired)_contig_114645:1887-1902|+	8|LP161083-1_R1_(paired)_trimmed_(paired)_contig_188748:538-553|-	N/A	8|TCunknown-1_(paired)_contig_38283:688-703|+	0.43	0.2	0.99	TTTTTATTCCGCTCAATCTTGTCGCGGTAAGACTTTACATGTGCAGCACGAACATCAATTGACATGAATCAATAATTTCAAAATTGCTTGAGACACACAA	AAACACAAACTAACAAACAAATAGATAAACAGAAACATAGGATAGTATTTTGTTTGTACAAATTATTGGAGTGAAGTCATAGATAAAGTAATCCGGAAGA
CPSSR_150	AC	211	9|FCHL5JJBBXX_L2_wHAXPI059581-29_1_(paired)_contig_276496:67-284|+	7|LP150221_R1_(paired)_trimmed_(paired)_contig_18493:1582-1595|+	11|LP161083-1_R1_(paired)_trimmed_(paired)_contig_165527:329-350|-	N/A	N/A	1.63	0.4	0.98	GAGAATCACAGGTTGGACAACCTTTTAAGTAGTGTTTCATGTATCATTTGTTCTCATGAAATATCAGCTCTCAATAAACACAAAGAACTTACCAAGCAAA	AAACTTGAACTATATTAACATAAGGAGTTTGAGAGCATAATGGCAAAAGTATTATCACCTTGAAGAAGGCCAAAGCTACATGAAAGAGAACCTTCGCTCC
CPSSR_151	AC	212	9|FCHL5JJBBXX_L2_wHAXPI059581-29_1_(paired)_contig_279707:161-378|+	10|LP150221_R1_(paired)_trimmed_(paired)_contig_162128:147-166|-	N/A	10|FCHL5H3BBXX_L3_wHAXPI062220-17_1_(paired)_contig_335309:133-152|+	N/A	0.47	0.4	0.98	GGATTTACGTAACCGTGGTTAAAAGAATCCCAAAAACCAAGGTTAAAAAAAACCCACTACCCTGATCAGTTTATATACAACACCATCTACCATTTTCAGT	AGAGAGAGACACAGAAAATGATGATCGGCGAGCCAAATCACCGTCATAATCCGACGGTCCATGTTCCTCCATGGACTTTCATCGACGATCAGCCTCTTGA
CPSSR_152	AC	214	9|FCHL5JJBBXX_L2_wHAXPI059581-29_1_(paired)_contig_79957:578-795|+	13|LP150221_R1_(paired)_trimmed_(paired)_contig_94401:969-994|+	N/A	9|FCHL5H3BBXX_L3_wHAXPI062220-17_1_(paired)_contig_136849:623-640|+	9|TCunknown-1_(paired)_contig_91123:142-159|-	1.73	0.2	0.98	GATCCTCTAGCCCCTGTATCACAGATGTCTTTAATCAAACTTAAAAGTCCACCACATACATACCAACACCATGCCACTTAAATAGTTCAATAAGGAATAA	AGAGACACAGAGAGAACCAACATAGTAAGCCCGAGACAAACAAATCCATAATGTAGCAGACTAGCGGTAATAGGAGCATTTATGTACCTTTTTAAGAACA
CPSSR_153	ACA	215	11|FCHL5JJBBXX_L2_wHAXPI059581-29_1_(paired)_contig_95327:478-710|+	9|LP150221_R1_(paired)_trimmed_(paired)_contig_44303:601-627|+	N/A	9|FCHL5H3BBXX_L3_wHAXPI062220-17_1_(paired)_contig_52779:497-523|+	N/A	0.94	0.4	0.98	CCATGCTTCGCTCCCAGTGTACGGCACGCACAGATCATGGTCCCCGCTGCGTCCACATTCATCTTTTGTTAAATTCTTCTCAAACACACCTCACATTCAC	AGAGAAAGAGAAAGAGACCTGTAAATAAGTGCCCGATATCCTCCGGTAGTTAGGTTCTTGTGGTAGTCAATCATACTCCCAGCATCGTGACGGTAAGAAA
CPSSR_154	ACA	216	5|FCHL5JJBBXX_L2_wHAXPI059581-29_1_(paired)_contig_102468:134-348|+	5|LP150221_R1_(paired)_trimmed_(paired)_contig_56651:4687-4701|-	5|LP161083-1_R1_(paired)_trimmed_(paired)_contig_234403:268-282|+	6|FCHL5H3BBXX_L3_wHAXPI062220-17_1_(paired)_contig_54638:171-188|+	N/A	0.43	0.2	0.99	CACACGACATAAAATTGAGTGTGCTCTCGTACTGTAACTATAGTAAATAACTAGGCCTAAACTAACTAAAACACGAAAAGATATATTGATATCAACTTAT	ACGAGAAAAAAAAATAGTACACAAATAAAATAAAATTATATATCTCTTCTTATGATCTTTCATTAAACCACCAATCCTAAATCCGTATTAATAAGGTCTA
CPSSR_155	ACA	218	5|FCHL5JJBBXX_L2_wHAXPI059581-29_1_(paired)_contig_181011:96-310|+	4|LP150221_R1_(paired)_trimmed_(paired)_contig_16958:199-210|-	4|LP161083-1_R1_(paired)_trimmed_(paired)_contig_53717:278-289|+	N/A	N/A	0.47	0.4	0.99	CTGGGAGGTACCTTGTGCTCTTATTTGTTGCGTTCCTTAGAAATTTTAATGGGGTGTTACTGCATCTGCAGTGGTTTTCTGATGCTTAACTGTCTCATGT	TTTTATTTTTGTTTTTAGTCACCCTTGGAAAAGCTAACAATACTTTGATGAGAGTAAGCAGCAATTTTCTCTCAATCCTAAAATTGAAAGCAAGGTTTTC
CPSSR_156	ACA	219	5|FCHL5JJBBXX_L2_wHAXPI059581-29_1_(paired)_contig_190232:513-727|+	4|LP150221_R1_(paired)_trimmed_(paired)_contig_4237:386-397|+	4|LP161083-1_R1_(paired)_trimmed_(paired)_contig_151856:1152-1163|-	4|FCHL5H3BBXX_L3_wHAXPI062220-17_1_(paired)_contig_89033:1820-1831|-	N/A	0.43	0.2	0.99	TGAATCATCATCATCAACAAATCCAGAAGAATGGTCAGATGTACGACGATTCCGGTTTGGATTACGATCTGAAAGCGATTCCAGGTAAAGCCATCTTCAC	CCAGATCGATCAAACTTCAAGCAACAACGCGAACAAGAGGTTGAAGCAATCAATTCCGACAGGTTCATCTTCGAACTCTTCAGCAACATGGGGGGTTCTA
CPSSR_157	ACA	220	5|FCHL5JJBBXX_L2_wHAXPI059581-29_1_(paired)_contig_267685:456-670|+	3|LP150221_R1_(paired)_trimmed_(paired)_contig_183217:688-696|-	3|LP161083-1_R1_(paired)_trimmed_(paired)_contig_40508:503-511|+	3|FCHL5H3BBXX_L3_wHAXPI062220-17_1_(paired)_contig_17051:612-620|+	N/A	0.87	0.2	0.97	GACCCACCGTTATTGTAATGTTACGTCCCAATACGGTACGCAACAGAATTCGCAACTTCAGTGCGCAATGATCGTTGCCAAAGAACGAACACACTCAAAC	CTAACAAACTTTTAGGTTCTTCTCATTGGCTTGCATTTGGCTTCAAACCAACCAAGTAACGAAACGTCTCTGGGACTACTACAAAGCTAGCTAGTATATA
CPSSR_158	ACA	221	5|FCHL5JJBBXX_L2_wHAXPI059581-29_1_(paired)_contig_274643:119-333|+	5|LP150221_R1_(paired)_trimmed_(paired)_contig_147892:1074-1088|-	N/A	8|FCHL5H3BBXX_L3_wHAXPI062220-17_1_(paired)_contig_51860:283-306|-	N/A	1.41	0.4	1	CTCTAAAAGATTGGAAACAAAACAGAGAGGCATAAAAAATTGGCCATTTTCATGGCTAGTGCCTAGGCAGAGAGGATAAGAAAAGTCTGAGGAAAAATCT	AGAACAAAAGCAGGCCTTAGTGGGTTTGAACAGTGAAACCAATTACATATTACCTCATTTTTTGACAGGTGTGAAAGAGAAGACTTTGCTCACTGTATCT
CPSSR_159	ACA	222	5|FCHL5JJBBXX_L2_wHAXPI059581-29_1_(paired)_contig_38196:221-435|+	4|LP150221_R1_(paired)_trimmed_(paired)_contig_129354:2626-2637|-	3|LP161083-1_R1_(paired)_trimmed_(paired)_contig_259476:127-135|+	4|FCHL5H3BBXX_L3_wHAXPI062220-17_1_(paired)_contig_18831:308-319|+	N/A	0.71	0.2	0.99	AAGTTACAAACATACGATAGGAAATGTTCAAAACGGGTACTACACTCCCCTTTTTTACAGTTACTTGACTTATTATTACACCACATTGCTAAACTTTACG	CACCTGAAGGTGACCATATAGGTAGTAGCATGACTCTGATATCTGTTTGATACCCAACCCAAAGGATTGCAACGACACTGATGATATCCTCATGGGAAAT
CPSSR_160	ACA	223	5|FCHL5JJBBXX_L2_wHAXPI059581-29_1_(paired)_contig_41599:425-639|+	N/A	N/A	3|FCHL5H3BBXX_L3_wHAXPI062220-17_1_(paired)_contig_9542:240-248|+	4|TCunknown-1_(paired)_contig_72970:834-845|-	0.82	0.4	0.97	TAGGGCATGGCCATGAAAACACCCATAAGCAAGGCCTTTTCATCTTGAAATCTAATCAATTCTTTGCAAACCAACTCATGCTCATAAATATTAGACATTG	AAAAAACAGCTTACAATCCGGTACTGGTGCATTACAAAACCAACCTCAACTCACCCTTCCGAGACATCTGACTGTGATTGTGGACTGTTACATTTTTATT
CPSSR_161	ACA	225	6|FCHL5JJBBXX_L2_wHAXPI059581-29_1_(paired)_contig_171166:1035-1252|+	5|LP150221_R1_(paired)_trimmed_(paired)_contig_176056:778-792|-	5|LP161083-1_R1_(paired)_trimmed_(paired)_contig_194006:171-185|+	N/A	N/A	0.47	0.4	0.98	AGATTTCTCCAGGTAACTCGTAGCGAATTCCAGCGTCTGTTGCACAGTCACGCCAACTATCGGTTCCGCTTGATCAACTGCTCACAGTATCAGCACAACC	AAAACAAAAAACACAAAGTTAAGCACACTCAGTATGCATATATGTTTGATATAATTCCATCAATAATCGGAGAATACTGAAATGGCGTGTAGAAAGTAAA
CPSSR_162	ACA	227	6|FCHL5JJBBXX_L2_wHAXPI059581-29_1_(paired)_contig_43604:168-385|+	3|LP150221_R1_(paired)_trimmed_(paired)_contig_70399:1504-1512|+	3|LP161083-1_R1_(paired)_trimmed_(paired)_contig_10481:2056-2064|+	3|FCHL5H3BBXX_L3_wHAXPI062220-17_1_(paired)_contig_159291:250-258|-	N/A	1.3	0.2	0.98	ATCGTTAGTTAATTCTTCCAAACAAGGAAACATGACATACCAGCTTAACAGCCACTTCTTCGCCACTTTGCACATTAACACCTAAATCAATAAAACCACC	AAATTCAGTATCAAGATCACAACAAATCAATGCCTAATCTTCTATTTGCTGCCGAGAAACTCAAACAGGAAAAGAAAGTAACAACATTTTGAGATTCATG
CPSSR_163	ACA	228	6|FCHL5JJBBXX_L2_wHAXPI059581-29_1_(paired)_contig_5358:227-444|+	7|LP150221_R1_(paired)_trimmed_(paired)_contig_78059:337-357|+	N/A	5|FCHL5H3BBXX_L3_wHAXPI062220-17_1_(paired)_contig_218923:161-175|-	N/A	0.82	0.4	0.99	CTTATATTTGTAGCTTTTGCAAAAGGGAATTCAGATCTGCTCAAGCTCTTGGTGGTCATATGAATGTTCACAGGAGAGATAGAGCCAGGTTGAGATCAGT	GTCACCTCCAAGGGAAGACATTAATCTTAACCTTAACCCTATTCTTCCTAGTCCTAACCCTAACCCTAATTTCTTAACCACACCTCCTCCTTCAACTAGG
CPSSR_164	ACA	229	6|FCHL5JJBBXX_L2_wHAXPI059581-29_1_(paired)_contig_54114:343-560|+	3|LP150221_R1_(paired)_trimmed_(paired)_contig_41094:476-484|-	3|LP161083-1_R1_(paired)_trimmed_(paired)_contig_171974:168-176|+	N/A	N/A	1.41	0.4	1	GAGCTGGTGAGCGCCTACGAGATCCTCTCCGATCCAAAAGAACGCGCTTCGTACGATTCGCACCGCCGAACACAAATCCTCTCATCAGATGGTCATTCTG	ACTCAGGTGGTTACTCAGCCTTCGCCGTCCCCGACCTCACCTTCTACCGCACAATTAGACGCTTCCCGGGGGGTTATACCGAGGATGATGGAGGATTTTA
CPSSR_165	ACA	230	7|FCHL5JJBBXX_L2_wHAXPI059581-29_1_(paired)_contig_17571:694-914|+	4|LP150221_R1_(paired)_trimmed_(paired)_contig_198206:714-725|+	4|LP161083-1_R1_(paired)_trimmed_(paired)_contig_105072:572-583|+	4|FCHL5H3BBXX_L3_wHAXPI062220-17_1_(paired)_contig_270898:440-451|+	N/A	1.3	0.2	0.97	TGATCAAACCTTACAAAAAGGGGTACCTCTCCTAAATACTATAAATACAAGAGTGCTGATTTTATGTTCCTTACACAACAAAGGGAAGAAAAACAGTACT	ACTTCTTATATAGTTATTGCTTTGATTTCAATACTGCTACAACACACTCTTGGAAGGCATGGGTGGAAACAGCAGGCAAAAGAAGTCATCTTCCAGCAAT
CPSSR_166	ACA	231	7|FCHL5JJBBXX_L2_wHAXPI059581-29_1_(paired)_contig_255398:5-225|+	6|LP150221_R1_(paired)_trimmed_(paired)_contig_123559:763-780|-	6|LP161083-1_R1_(paired)_trimmed_(paired)_contig_14375:470-487|+	N/A	N/A	0.47	0.4	0.99	AACAAGTTTAAAGATGGGTCTACCACTAATCTCAGTCCTGTTAAACCCCATGGTGGCTTCTTCCAAAGAAATGCAGACAAAGTTAAAGAAGGTGATGATG	TTTTTGGTGCTGAGAAGAGAAAAGTCTACACTGGCCCAAATCCTCTACACAATAGAAGAAGATAACTGGTAGATTAACTTAAAACCAATTAAGCTTGATT
CPSSR_167	ACA	232	7|FCHL5JJBBXX_L2_wHAXPI059581-29_1_(paired)_contig_289842:35-255|+	9|LP150221_R1_(paired)_trimmed_(paired)_contig_23174:2741-2767|+	N/A	10|FCHL5H3BBXX_L3_wHAXPI062220-17_1_(paired)_contig_169257:430-459|+	N/A	1.25	0.4	0.97	CTGCCCGTTCCATGCGTGGCTCTCGTGCTCGCACCAACTTTGTCTACTCCGACATGCCCCCTGGTTCCTCCGTCACTTCTATCATCTCTCCCGACGAACC	CCAACATGACATTTCGTCTCTCTTTGTACCTCCATCAATAAATCATCAACATAACCACCACCAGCCCAAGCCCACAATTATCAACAACCTCAACCTCTCT
CPSSR_168	ACA	234	8|FCHL5JJBBXX_L2_wHAXPI059581-29_1_(paired)_contig_159008:1003-1226|+	6|LP150221_R1_(paired)_trimmed_(paired)_contig_134387:979-996|+	6|LP161083-1_R1_(paired)_trimmed_(paired)_contig_114915:607-624|-	6|FCHL5H3BBXX_L3_wHAXPI062220-17_1_(paired)_contig_87696:1197-1214|+	7|TCunknown-1_(paired)_contig_63751:1434-1454|+	0.8	0	0.99	CGCTTTCTGCCGCTTCTGCTTCTGCCACCGTTTATCCTTCCGAAAATCATAGTACTATCACTAGTACTTTCGTGTCAGGTCCTTTAAAACCCAACAAAAG	AAGTCTTAATTCCGTCTATCTGGGAAAACCCATCAGCCTAGAAGAGGATAAAAGTTCGTGCCACGGATTTTTTGAGGTGAATTCGAAGCTACTAAAGCCA
CPSSR_169	ACAA	237	5|FCHL5JJBBXX_L2_wHAXPI059581-29_1_(paired)_contig_193003:53-272|+	2|LP150221_R1_(paired)_trimmed_(paired)_contig_133428:823-830|+	2|LP161083-1_R1_(paired)_trimmed_(paired)_contig_102946:1987-1994|+	N/A	N/A	1.41	0.4	0.95	TACCTCAGACAAAATGTGGAACAAGCTAAACAGTATTAAACATAAAAGATTACACATAAGCTGCGTCATTACTTTTGATCATTTTCAGTTAATGTAGAAC	AATTGATATCTAATCGGACTGTCACTAACAACAATTATGGTTTAATTTTAAAGCGTGCACACATAAAGATCATAACAAAGCCAAAGTTAAGAAAAAATAA
CPSSR_170	ACAG	238	5|FCHL5JJBBXX_L2_wHAXPI059581-29_1_(paired)_contig_97027:157-376|+	5|LP150221_R1_(paired)_trimmed_(paired)_contig_21567:1086-1105|-	N/A	4|FCHL5H3BBXX_L3_wHAXPI062220-17_1_(paired)_contig_35115:652-667|-	N/A	0.47	0.4	0.98	AAAAATCTTCTCACATTTTCGAACCAAAAATTCAAATTCAAGCGGGTGGTTCAAGCAAAAGCGTAGAGCCATGAAGAGATTTGAGGCATGGAGGGCACAC	ACACACATGCCTAATACTAAGACTCATGACTACTACTATTCAGTATTCATTGGTATGTGACCCAACCTTAGCCGAACAATTTATAACAACTCCATCCTGT
CPSSR_171	ACAT	239	5|FCHL5JJBBXX_L2_wHAXPI059581-29_1_(paired)_contig_263556:391-610|+	6|LP150221_R1_(paired)_trimmed_(paired)_contig_106469:1492-1515|+	N/A	6|FCHL5H3BBXX_L3_wHAXPI062220-17_1_(paired)_contig_260604:121-144|-	4|TCunknown-1_(paired)_contig_78098:195-210|-	0.83	0.2	0.99	CAGTGATCTCATCGTCCAATTCCCCATGCATAGGATCAATCCTCAACTGAATTTCATCAGAATTAGCAGCTGGTCTGGTACTAAGCCCTTCTCTGCTTAC	ATGTATTAAAAGTCAGAAATGCTTAACCAAAACTTTTGATCTTCATCATCATACAAACAGAAAATACAAGAAGCGTCAGTTACAAAACCCTAGGGTTTTT
CPSSR_172	ACC	241	5|FCHL5JJBBXX_L2_wHAXPI059581-29_1_(paired)_contig_135447:554-768|+	4|LP150221_R1_(paired)_trimmed_(paired)_contig_16304:1424-1435|-	N/A	N/A	4|TCunknown-1_(paired)_contig_31707:2485-2496|-	0.47	0.4	0.99	ATTCGAGGCACGTTGAGGTGAGACTGATGCCGGAAGCTGCGATTGTATCTACCAGTCCTACTCACGAAACATACGCGGTGGCTATGAGAGTGAAGGCTCG	ACAACCGGCGCGCAATAGCAACAATGCGCCGCTTCTAGACCCGTCGCGACGTGCGCCCATCGATTTAATAACCGTCCTCGATGTGAGCGGAAGCATGACG
CPSSR_173	ACC	243	5|FCHL5JJBBXX_L2_wHAXPI059581-29_1_(paired)_contig_19568:1324-1538|+	6|LP150221_R1_(paired)_trimmed_(paired)_contig_71924:4737-4754|-	6|LP161083-1_R1_(paired)_trimmed_(paired)_contig_192968:566-583|+	N/A	N/A	0.47	0.4	1	TGTTCCAGTAGGAGTAACGGAACCTCCAGCACTTTCCTGACTCGTCCTCGAAACTCAGTAACAGACCTTTCTCTCCGCCGACCGAGTCACCGCCGCCACT	GCCGTTGTTGCTATTATTATAACTATTGTAATTGTTGTTGTTTAACGGAAAGTACTTCTCGGCGTGCTGTTTGGGAATCACGAGACGGTTGAGCTTACCG
CPSSR_174	ACC	244	5|FCHL5JJBBXX_L2_wHAXPI059581-29_1_(paired)_contig_223946:271-485|+	4|LP150221_R1_(paired)_trimmed_(paired)_contig_130020:376-387|-	4|LP161083-1_R1_(paired)_trimmed_(paired)_contig_129992:776-787|+	4|FCHL5H3BBXX_L3_wHAXPI062220-17_1_(paired)_contig_161295:131-142|+	N/A	0.43	0.2	0.98	TGAGTAGTTTGTTTTCTCTCCCACCCAGCAGCAGCAGGAGCAGCAGCAGCTTGACCTTACCAGCAGCTTCTTCATTATTCACTAGCACCATACCACCAGT	TAATTATTCATCATTTATTATAGCTGCTGTTGATCATGCACCACCACCCTCTAATAACCTCCTCATCACTTGTTCAACTCCAAAGCAACAAAGAGAAGAT
CPSSR_175	ACC	245	5|FCHL5JJBBXX_L2_wHAXPI059581-29_1_(paired)_contig_238922:47-261|+	4|LP150221_R1_(paired)_trimmed_(paired)_contig_121983:498-509|+	4|LP161083-1_R1_(paired)_trimmed_(paired)_contig_29378:392-403|-	5|FCHL5H3BBXX_L3_wHAXPI062220-17_1_(paired)_contig_105104:716-730|-	N/A	0.5	0.2	0.99	ATTTGGATGAAGGCCTGGGCTGTTCGGCAGCTGCATTCTGTGCAGTTCCTTTCGAAGAAGTTGCTTGGTTAGCTTTTGAATTGGAAGTGTTGGCACTAGT	AGATTCTTGCTTATCTCTAACTACTGCACCTTGAGAGCCTCTCACCTGAGCCGCTCTCTTATCCTTTCTTTTGGGCCTGTAACTAGATCTCTCCCTCCTA
CPSSR_176	ACC	246	5|FCHL5JJBBXX_L2_wHAXPI059581-29_1_(paired)_contig_76097:358-572|+	4|LP150221_R1_(paired)_trimmed_(paired)_contig_173796:471-482|-	4|LP161083-1_R1_(paired)_trimmed_(paired)_contig_56253:335-346|-	3|FCHL5H3BBXX_L3_wHAXPI062220-17_1_(paired)_contig_195070:295-303|-	N/A	0.71	0.2	0.99	CACATCACAAACAACCAATAGAATGGCGCTAATGTATCATATCCTCATCCATATCACCTTCTAATCTTCCCTTAAAACCACTCCCACTTCTACATTCACA	ACAACCTTCTTTACTAGACTAAGTCTGCTTTTGCAAGTTTGCAGCAAACACACTTAATAGAGATATGGCAACCTCTGCAATCAACAAGACAGCATTTGCT
CPSSR_177	ACC	247	5|FCHL5JJBBXX_L2_wHAXPI059581-29_1_(paired)_contig_84932:268-482|+	3|LP150221_R1_(paired)_trimmed_(paired)_contig_7175:633-641|-	3|LP161083-1_R1_(paired)_trimmed_(paired)_contig_60208:1335-1343|+	N/A	N/A	0.94	0.4	1	GAATCTCCACCATCGAGCTGGTAAATAGGAATTTCCCCATTCGAGTCGTATCATTCATCACCACATTCCGTACACTTCCCCACCGGCACACACCATTTTT	AAGCTCGCATATAACAATCTCATCGGGGTCCGATGGATTGTATATATACACAAAATCTCCAGCACAAGTCAGACCTATTGACTCCATCATCTGACAGTCA
CPSSR_178	ACC	248	5|FCHL5JJBBXX_L2_wHAXPI059581-29_1_(paired)_contig_91296:40-254|+	4|LP150221_R1_(paired)_trimmed_(paired)_contig_64190:1113-1124|+	4|LP161083-1_R1_(paired)_trimmed_(paired)_contig_196282:236-247|+	N/A	3|TCunknown-1_(paired)_contig_45485:517-525|+	0.71	0.2	0.98	TGAAATGTGGAGACTCAGAAACAGCAAGCTTCACATAATCACATACAGCAATGTCACCACCAAAACTCGACCCGTACATCTTCTACCCATGTACTATTCA	GCACAGATTCAGAGTCTCAATGAAAACGACCAAGACACAGTGCAAGAAATCTCAACCATTCTCAGTGACAAGAACTGGAAAGTCCTCATTGAATCATCCG
CPSSR_179	ACC	250	6|FCHL5JJBBXX_L2_wHAXPI059581-29_1_(paired)_contig_126710:127-344|+	4|LP150221_R1_(paired)_trimmed_(paired)_contig_38952:973-984|-	5|LP161083-1_R1_(paired)_trimmed_(paired)_contig_78888:208-222|-	2|FCHL5H3BBXX_L3_wHAXPI062220-17_1_(paired)_contig_154647:111-116|-	N/A	1.48	0.2	0.94	CGCCCGCCGTCGCCGCATTATCAAAATTCTCCCTAATCGCCGCCACAATCTCTACCAAATCTCTATGCCTAACCACAATCCTCATATCCCCAATCTCACT	GCCATAACTATACGAAGACCCCGCATCGTCAGACTTATCCGACTTGCTCATAGCCGGAAACTTCTTCGGCAGCGCAAACGACTCCTTCATCGGCGGAGGC
CPSSR_180	ACC	251	6|FCHL5JJBBXX_L2_wHAXPI059581-29_1_(paired)_contig_130991:907-1124|+	3|LP150221_R1_(paired)_trimmed_(paired)_contig_160202:706-714|-	N/A	4|FCHL5H3BBXX_L3_wHAXPI062220-17_1_(paired)_contig_59467:120-131|+	6|TCunknown-1_(paired)_contig_49896:4164-4181|+	1.3	0.2	0.97	CCGACGCAGTTTCAAATTCATCACCACCACTCACAAACCCCTCATCACCACTGTCACTACTAGAACTACTGCTACTGCTACTACTAGAACTGCTGCTACT	ACTTTTCTTATTGTTATTAGCAAAAAACTTCAATTCATTGGCTGTTTTGGAGTGATTTTCAATATCAGAATCATCATAAGAAGGAGATGCTCTAATAGGA
CPSSR_181	ACC	252	6|FCHL5JJBBXX_L2_wHAXPI059581-29_1_(paired)_contig_165603:182-399|+	N/A	4|LP161083-1_R1_(paired)_trimmed_(paired)_contig_110962:983-994|-	4|FCHL5H3BBXX_L3_wHAXPI062220-17_1_(paired)_contig_77541:294-305|+	N/A	0.94	0.4	0.97	AAACCCAAAGAAATACTTTTTTTGAGATTAACCCCCAGAAAACCATGGACTTTAACTTAACCAAAAACATCCCAGATGATAGAGAAACTAAGACCCCACA	GCCACCGCTACCATCATCACAACCCAAGAATCATCACAAGTCTATCTCCAACGGCACACTTAAGCGACACCGCCTTAACCACCACAACCCACAGCCACCA
CPSSR_182	ACC	256	6|FCHL5JJBBXX_L2_wHAXPI059581-29_1_(paired)_contig_61642:283-500|+	N/A	5|LP161083-1_R1_(paired)_trimmed_(paired)_contig_251087:238-252|+	6|FCHL5H3BBXX_L3_wHAXPI062220-17_1_(paired)_contig_92222:321-338|-	5|TCunknown-1_(paired)_contig_134523:139-153|+	0.5	0.2	0.99	CCCTGCCTTCTTCCGCAATCCCCCGTAATCGCGTCGATTTCGGCTCGCTCTGCTGCACAGCAACAACCGCCGTCTCCTGCAATTCTGCTCCATTCCTCGA	GTTAAACCCCCCGATCTCCACTCCTCCTCCCTTCAACACTCCACGCCTCGGCCTCAAGTTCCACGGCTTCTGAACCGGTGACGGCTCGTCAACGTTCGCT
CPSSR_183	ACT	260	5|FCHL5JJBBXX_L2_wHAXPI059581-29_1_(paired)_contig_271074:208-422|+	N/A	6|LP161083-1_R1_(paired)_trimmed_(paired)_contig_6028:1696-1713|+	N/A	3|TCunknown-1_(paired)_contig_37477:279-287|+	1.25	0.4	1	GGATATAAACCGAAGAGTGCAATACAGTATCCCCATTCTTTTCAGACCCAAGGAACGAAACATTCGAAGTGGGTAAAAACTGCTGAGGAGTTCCATTAAA	ACCCTTATTTTTCCCAGTCACAATAGCAAATATCCCACTCATAACATTCTTCAAATTCACCTCTGGAATCGTATTAATTTGCATAGGATTAATAATACCC
CPSSR_184	ACT	261	5|FCHL5JJBBXX_L2_wHAXPI059581-29_1_(paired)_contig_50043:10-224|+	N/A	N/A	4|FCHL5H3BBXX_L3_wHAXPI062220-17_1_(paired)_contig_76012:118-129|-	4|TCunknown-1_(paired)_contig_4397:278-289|+	0.47	0.4	0.98	CTCTTTGTATGAGCTCCTCCTCATCTGTTGATTCCTTTATGTCCCGTGTAAGCTCGTTAATGACTTCATTCATCGATGCGTCATTGCCATATCCGTCCTC	GCCAGACTTATGTGTATACATTTTCCTCACACTGGTAGTTGCTTCTTGCGTAGATTGCTTCCTACGCCGATTTGGTCTTGATGACTCCGGTTGTGACATT
CPSSR_185	ACT	262	5|FCHL5JJBBXX_L2_wHAXPI059581-29_1_(paired)_contig_73401:244-458|+	4|LP150221_R1_(paired)_trimmed_(paired)_contig_35263:138-149|-	4|LP161083-1_R1_(paired)_trimmed_(paired)_contig_44671:2236-2247|-	N/A	4|TCunknown-1_(paired)_contig_20799:508-519|-	0.43	0.2	0.99	AGTTCCACTAAAGTGAGTGGATTATAACATATTTGTACATTTAGTAGATTGTCAATGAAATGCATGCATTTATGCATGGTTTGTTTCTCAAGAATGCTGA	GCATGTTTTGTACTAAAAAAAGATATGAACTATTTTTACTCATGCCATACTGCCATTTAACTAGAGTTTGTAATGAACTATGGCGGTCACAATGGTGATT
CPSSR_186	ACT	263	6|FCHL5JJBBXX_L2_wHAXPI059581-29_1_(paired)_contig_104637:517-734|+	5|LP150221_R1_(paired)_trimmed_(paired)_contig_118471:1444-1458|-	5|LP161083-1_R1_(paired)_trimmed_(paired)_contig_187220:296-310|+	N/A	N/A	0.47	0.4	1	CCGGAAGAGGCGGATCCAAATCAGCCACGTTGATAGGAGGATCAATATCGTTGAACCCGAAATGACAACCCTCCATGACCGCCTGTTTTCCGCTACCACA	AGTACTACTAATGCTTGTTGTCGCGGTAGTGATTGTGGTGGTTGGAGTGATGAGATTTTTGCTCGAAAACAGTTTCTTGAGCTTGAAGTATCTTATATTG
CPSSR_187	ACT	268	7|FCHL5JJBBXX_L2_wHAXPI059581-29_1_(paired)_contig_123948:516-736|+	8|LP150221_R1_(paired)_trimmed_(paired)_contig_12313:1897-1920|+	8|LP161083-1_R1_(paired)_trimmed_(paired)_contig_71412:1601-1624|+	7|FCHL5H3BBXX_L3_wHAXPI062220-17_1_(paired)_contig_111059:160-180|+	9|TCunknown-1_(paired)_contig_97111:895-921|-	0.75	0	0.99	GAATTGCTCAGAGGAAAAGAAAGTATGAAAAGAATCGAGTATGTTGAAGAAGATTAATAGCATATTAAGAAGTAACAGCTGAGTAATAAGTTACCAGCCC	ATGCGACACCTGATACAATTATACAAAGTATGAAACTACCGTTAAAATGACTAATGAATGAACCATACATCAAAGTCATTCTTCGAATATGACTCAGCCT
CPSSR_188	ACT	269	8|FCHL5JJBBXX_L2_wHAXPI059581-29_1_(paired)_contig_117180:722-945|+	9|LP150221_R1_(paired)_trimmed_(paired)_contig_240398:242-268|+	N/A	N/A	6|TCunknown-1_(paired)_contig_28998:845-862|+	1.25	0.4	0.97	GCTTATGTCGAATGAGGATTATCGAAATGGGTTCGCTTCTAATTCACTACTTTCTAGCTATGGATCCATGTTTGGATCTTCACCTTCTTCTATCACTTCC	CCAACAATGGCTTCTATTATTGCTTCTAGCCTTCACCAGCAACAGAAGTTCATGCAAGGCGGCGAGGGTTGTGAAGGAAATCGAGCGGCGGCGGCCAATT
CPSSR_189	AG	270	10|FCHL5JJBBXX_L2_wHAXPI059581-29_1_(paired)_contig_12409:523-742|+	N/A	N/A	5|FCHL5H3BBXX_L3_wHAXPI062220-17_1_(paired)_contig_21990:876-885|-	6|TCunknown-1_(paired)_contig_3072:985-996|-	2.16	0.4	0.96	AAAATAAGATGGACTAAGTGTCTTAACTTTGACTTTAGCAAAAACGAATTGGGTACAACCAGAAAGCTATAACAATGTAATCATAAATCATGATATGGAA	AACTTAGTCTTCTTTATAGCGTCAGCTAAGAGTGTGCCTCTTTGGTGCTTTTTGTTAGATAATTAAACTTTTTCTATGTTCCTTTGTTAAATCAATAATA
CPSSR_190	AG	271	10|FCHL5JJBBXX_L2_wHAXPI059581-29_1_(paired)_contig_17086:881-1100|+	8|LP150221_R1_(paired)_trimmed_(paired)_contig_239063:283-298|-	8|LP161083-1_R1_(paired)_trimmed_(paired)_contig_135624:241-256|-	8|FCHL5H3BBXX_L3_wHAXPI062220-17_1_(paired)_contig_164620:553-568|+	N/A	0.87	0.2	0.99	CCAGATAAAAATTAACAAAAACCCATTAACAAATCACACAGATAATGAGATAATATTAATCCACCTGAAAATTTTCTAGAGAGAGAAAATATGGGTTTCT	TCACCTGTTGTTGTGTTTGTTCAGAGAGAGTAAAGGTAGAACATGTAGAGCAGCTGCCATTGAAACAGCAGGGTTGCAACTATGGTTTCAAGAAGCCTTT
CPSSR_191	AG	273	10|FCHL5JJBBXX_L2_wHAXPI059581-29_1_(paired)_contig_184804:33-252|+	7|LP150221_R1_(paired)_trimmed_(paired)_contig_5825:1118-1131|-	8|LP161083-1_R1_(paired)_trimmed_(paired)_contig_188790:505-520|+	N/A	14|TCunknown-1_(paired)_contig_44815:2457-2484|-	2.68	0.2	0.98	ATAAATATACTATCAAAGGAAGAAAAGAAAAATATGAATACATATGACAGTAGAGACACATACATCTGCCACAAGGGCACAGAAACAATACATTAATGGC	ACTTACATGAAACTTGGTGACCATAATCAATTTGGAACTCTCATCCCATCATGAGCTTTATTAAGGTGAAATAACAAATTAATCGAACAAATAGAATGTG
CPSSR_192	AG	274	10|FCHL5JJBBXX_L2_wHAXPI059581-29_1_(paired)_contig_186609:304-523|+	7|LP150221_R1_(paired)_trimmed_(paired)_contig_217233:460-473|-	7|LP161083-1_R1_(paired)_trimmed_(paired)_contig_90410:2436-2449|+	8|FCHL5H3BBXX_L3_wHAXPI062220-17_1_(paired)_contig_48019:333-348|+	N/A	1.22	0.2	0.99	AGTGCCAGGATTGGGGGAGCAAAAAACTGCAAAACCACAAGACACAAATAGTGATTATACAGAAAAAACTTACACAGCCAGCAACTATCAAAATACACTT	AACACAATCGGAATACACTCATAGACCCTAGTTTGCTTCTCTATAGCCATTTATACTCCAAATGAACTCTCCCTGGCCAAGAACAATAAATTTGCTCAAG
CPSSR_193	AG	276	10|FCHL5JJBBXX_L2_wHAXPI059581-29_1_(paired)_contig_195822:87-306|+	N/A	N/A	10|FCHL5H3BBXX_L3_wHAXPI062220-17_1_(paired)_contig_312443:106-125|+	11|TCunknown-1_(paired)_contig_131923:112-133|+	0.47	0.4	1	CACAATTTTAACGGTCAAATATCGTGTTTTTTTAAGAGGCATTATATTATCGAACAAGGAGTTGCAGAACAGAGATGTATATACAATACAATATATGTTT	TAGTTACGGAAGTAGGGTTTAAGAGAGAGAGACAACGAGGACAACGTGGAGAACCAAGACCAGGGTTAATGGTTGGTTCGTGATGCAAGTTTCCACTTCT
CPSSR_194	AG	277	10|FCHL5JJBBXX_L2_wHAXPI059581-29_1_(paired)_contig_206499:117-336|+	N/A	N/A	8|FCHL5H3BBXX_L3_wHAXPI062220-17_1_(paired)_contig_111030:296-311|-	7|TCunknown-1_(paired)_contig_23543:2517-2530|-	1.25	0.4	1	AACACCGGAGCTACCCCGATGTTCTTCAAGGTAGGTTTCTGTTAACCTTTAAAAGAGTCAATTAAAGAGAATGAAAAGGTTGGAGAGGGGGGAGAGAGAA	CACAACCATTTCTTAATGCCTTCAACATGTAATGCACACCAAACCATATAGTGTATGTATGTGTCTGTGGGTTTAAAAGAGAGGAGACAGAGAGAGCAGT
CPSSR_195	AG	280	10|FCHL5JJBBXX_L2_wHAXPI059581-29_1_(paired)_contig_37200:183-402|+	13|LP150221_R1_(paired)_trimmed_(paired)_contig_57649:1450-1475|+	N/A	9|FCHL5H3BBXX_L3_wHAXPI062220-17_1_(paired)_contig_243923:547-564|+	N/A	1.7	0.4	1	TGAAAAGAGAAATTTGGCAACAATGTAAACAACAAAGACCTAAAATTCATACACAAATACACAACCATATACATATACCTATACATAAATATGTAGAGAA	ATACATACTTTGATGAGAGAGGGAACAGAGAGGCGAATGGATGGAAAAGGTCCAATGGATTTGACAGTGATTTCAACCTTGTTCATATCATCTCCTCCAC
CPSSR_196	AG	281	11|FCHL5JJBBXX_L2_wHAXPI059581-29_1_(paired)_contig_252314:277-498|+	11|LP150221_R1_(paired)_trimmed_(paired)_contig_67438:135-156|+	9|LP161083-1_R1_(paired)_trimmed_(paired)_contig_62161:1893-1910|+	N/A	N/A	0.94	0.4	1	GACGGTAATTGAAATTTGAATTTGTACCTGAAAATTAGAAACTATATCATTCAATCCATTTGAGAACATGAAAAACACTTCATAAAGAAATTGAATGGCA	ATTTCATACACCTTTGAACAGAAGGAACGCTTACGGTTTAATTATTGTTCTTCTTTCCCTATTTCTCTAAAAAAAACTTGGATTCAATGTAGTATTACAA
CPSSR_197	AG	282	11|FCHL5JJBBXX_L2_wHAXPI059581-29_1_(paired)_contig_28152:2397-2618|+	N/A	7|LP161083-1_R1_(paired)_trimmed_(paired)_contig_75133:140-153|-	N/A	10|TCunknown-1_(paired)_contig_88247:999-1018|+	1.7	0.4	0.96	TTGTCCTTTCTCCTCTTCGACTATAAACCCCAATTCAAAACCAAAATTAATCAAAATCAGAACAACAAAGAAAATTCGGTCCAAGTAGAGACACACACAC	TCTTAACCTTTGGAGAAGGTTCTGATAAGAATTCATTAGGATCGAGGCCATAACTTTCAAGCAACGCTCTTTTCTGCTCATTCGCCAATCCATTTCTCGG
CPSSR_198	AG	283	11|FCHL5JJBBXX_L2_wHAXPI059581-29_1_(paired)_contig_5944:91-312|+	6|LP150221_R1_(paired)_trimmed_(paired)_contig_54519:289-300|-	7|LP161083-1_R1_(paired)_trimmed_(paired)_contig_148477:322-335|-	N/A	N/A	2.16	0.4	0.96	ATCTTACACGCTCCAATTGGAATAGTTGACCTTACAAATGCCCCCAAAATCACCAACATTAGAAAGCCCATTTTCTCTAATCTCAGCAATTAATAAATTC	ACCTGGAAGTGGGTTGGCCTTTGCAGAGCTGAATGCTGCAAGATAAAGCACCTTTGTGAAGCCAAGAATAGGTGTCGACGGCGACGGAACAACCCTCAAG
CPSSR_199	AG	284	11|FCHL5JJBBXX_L2_wHAXPI059581-29_1_(paired)_contig_98132:1009-1230|+	7|LP150221_R1_(paired)_trimmed_(paired)_contig_87382:1051-1064|+	7|LP161083-1_R1_(paired)_trimmed_(paired)_contig_9796:1136-1149|+	N/A	N/A	1.89	0.4	0.98	AATTTAGCAGCCATCATTCTAGCCAATAAGCAAACGTCCCTCGTAACCTCAGGGGTTACTCGTGGATTACCTGCAATTAATGTCAAAGAAATGTCAAACC	CTCTACAATCTCCATGACTTCCGTTTACTACTAACTTTAAGTGGCAGTAAAAGAGGGAAGCAACAAATATTTTCACATTTGTAAATATTCCATATTTGTA
CPSSR_200	AG	285	12|FCHL5JJBBXX_L2_wHAXPI059581-29_1_(paired)_contig_104121:431-654|+	7|LP150221_R1_(paired)_trimmed_(paired)_contig_130492:254-267|+	7|LP161083-1_R1_(paired)_trimmed_(paired)_contig_65825:633-646|-	N/A	N/A	2.36	0.4	0.95	TTTTCGGGAAAATTGAATGAGAAAAGGAAAGAAAGTGGAGGAAAATTTCCCAGGGAAAATTGAAAAAAATCGATTCAACCCTCGATTGTGCGAAACAAAC	TAAAGAAGAGAATAATCACACGGAGAAAATGAAAATGTGGGACAAAAACAGGAAGGAAGGAAGGAAGATTAGGGACGACTGTTTCGCCGATAAATGCTGG
CPSSR_201	AG	286	12|FCHL5JJBBXX_L2_wHAXPI059581-29_1_(paired)_contig_111927:178-401|+	8|LP150221_R1_(paired)_trimmed_(paired)_contig_216566:620-635|-	9|LP161083-1_R1_(paired)_trimmed_(paired)_contig_102906:212-229|+	N/A	N/A	1.7	0.4	1	CTAATCTCCACTCTTGGCTGGCAATATGTAATAGTTGGGGATGAAAGCTAGATATGATTGTATTGCCAATTCCTACAATGAATGAGACTGTGTTTGTTTA	CAATTCAGGGCTATAAATAACACGAACCAAAACTAGATACAATTTTTAACTAACTGCCAGATGAACCCATCTTTGATAATTTGTCGCCGGCATCTCAAAA
CPSSR_202	AG	287	12|FCHL5JJBBXX_L2_wHAXPI059581-29_1_(paired)_contig_143141:460-683|+	12|LP150221_R1_(paired)_trimmed_(paired)_contig_207759:266-289|-	N/A	N/A	11|TCunknown-1_(paired)_contig_19303:2800-2821|+	0.47	0.4	0.96	AGGCAATGCTCCAGTATGTTGAACTAAATATAATCTACATTTGTGGGACATATGCTTCCCGTTGCATCCCATTCTTCAGTTTATTTTATTACTCGCAGCC	CTGATGGTGGAAAATTTACCTCGAATGAGCTACTATAACTTGCAGGAGAAACGGCCTTTAAAGCACGGCCATTCTTTTTAATTGATTGATGGTGTTGGAT
CPSSR_203	AG	288	12|FCHL5JJBBXX_L2_wHAXPI059581-29_1_(paired)_contig_158390:162-385|+	N/A	9|LP161083-1_R1_(paired)_trimmed_(paired)_contig_21236:2200-2217|-	11|FCHL5H3BBXX_L3_wHAXPI062220-17_1_(paired)_contig_338615:176-197|+	N/A	1.25	0.4	0.96	TCAAGTTATAAAGTCTTGCAACTATTTTGTCAAGAAATAGGTATGTCTAGTCTATTAACGTCTAAAAATGGACCACAACATGGAAGAAGATTCTTGAAAA	ATGCTTACGTGGTCATTCCAAGCATGGCGCTCGTTGTAAATGATGGCTGCACCAAGACTCCTAGCTGGGTTGATACCGGTTCCAGTAATAGGGATGGTGG
CPSSR_204	AG	290	12|FCHL5JJBBXX_L2_wHAXPI059581-29_1_(paired)_contig_306185:114-337|+	N/A	N/A	12|FCHL5H3BBXX_L3_wHAXPI062220-17_1_(paired)_contig_195731:400-423|+	13|TCunknown-1_(paired)_contig_135801:529-554|-	0.47	0.4	0.99	AAATTTTTAACCAATTTCAACTAGTTCCACAACAACAACTGTATATTTGAATCTAACAAGAAGTAAAACTAAAATCACAACATATTTCATCTAATTTTGT	GAGAGAGAGAGTACCCATCTTCACTGAGAACGCCGTGAGGGAATTTAGGGGAAGGAGAAGCTAAGCTATAGTTGTAAAGCTTGTTGCGATCAACAACACT
CPSSR_205	AG	292	13|FCHL5JJBBXX_L2_wHAXPI059581-29_1_(paired)_contig_131802:10-235|+	15|LP150221_R1_(paired)_trimmed_(paired)_contig_51779:671-700|-	11|LP161083-1_R1_(paired)_trimmed_(paired)_contig_41664:1513-1534|+	N/A	10|TCunknown-1_(paired)_contig_34162:172-191|-	1.92	0.2	0.99	GCTTGTTAAAAATAATTGTGGAATAACCATTTCCAGAAAAACTATTTACTTTTGAACACTTTATTTGTGAAGTATGAAAACGGGGCATATTCCAGACTTT	TCAATCCCTGCAACTTTAACATAAAAGTTCCTATTGTAGGTTCATGGGGTAAAAAAATTTAACCCCCAGGAACTAGTAGAGGATTACATTTGTTTGCCGA
CPSSR_206	AG	294	13|FCHL5JJBBXX_L2_wHAXPI059581-29_1_(paired)_contig_92231:365-590|+	N/A	N/A	9|FCHL5H3BBXX_L3_wHAXPI062220-17_1_(paired)_contig_114830:1051-1068|-	9|TCunknown-1_(paired)_contig_7565:1013-1030|-	1.89	0.4	0.99	AAAAATAAATAAAAGCTCCAAAATGAAGACATAGATCACTATAGAAGAAACAAATGATACGTAACAATCATTGTAAAGGAAATGAGCACCAAAACTCCCA	TTTGCAGATGTACCTCGCCACAGGGAATCCTCGTATTCTGCCTCACAAGGGCTCCAGCAGCAACCATGGCATGTTTTTCAACAACCACCCCGTCGAGCAG
CPSSR_207	AG	298	15|FCHL5JJBBXX_L2_wHAXPI059581-29_1_(paired)_contig_269999:22-251|+	14|LP150221_R1_(paired)_trimmed_(paired)_contig_133282:2414-2441|+	11|LP161083-1_R1_(paired)_trimmed_(paired)_contig_21727:1178-1199|-	14|FCHL5H3BBXX_L3_wHAXPI062220-17_1_(paired)_contig_210451:498-525|-	N/A	1.5	0.2	0.99	ATGCAGATCAGGTTTTAAGATAGAAAAGGGGATCAGATTGATGGAGAGACCTTTTGGCTCTGATACCAAATGATGCCGGACGCAATAGAAGAAGAAGAGA	TGCGCGACAGAAGAGGGAGAAGAAGAAAGCCTGCCCTAGCGAGGGAAAGAGAGCAATAGGCCACAACCTTCACACAAAGACACTCAAACATCCATTCTCA
CPSSR_208	AG	300	16|FCHL5JJBBXX_L2_wHAXPI059581-29_1_(paired)_contig_266163:127-358|+	13|LP150221_R1_(paired)_trimmed_(paired)_contig_44747:541-566|+	N/A	13|FCHL5H3BBXX_L3_wHAXPI062220-17_1_(paired)_contig_321593:329-354|+	N/A	1.41	0.4	0.96	ACAAAAACGATGATGAAGAGAGATCGAGATTTGAGCTTAGGGCTTACCTATGGAGAGCTTCGCTTCGGAGAGAAATCAGAGAAGAGAGAGCGCGCGCTAC	AAATGAATAAAGAAGCTTAAGACCAACGCGTAATGATGGGATGATGCGCTAACCGGAGCAACTGCCTAAACTGAAATAACAATAGTACCCCTGGATTTGA
CPSSR_209	AG	301	17|FCHL5JJBBXX_L2_wHAXPI059581-29_1_(paired)_contig_11362:121-354|+	18|LP150221_R1_(paired)_trimmed_(paired)_contig_88163:660-695|+	N/A	19|FCHL5H3BBXX_L3_wHAXPI062220-17_1_(paired)_contig_43800:1449-1486|-	N/A	0.82	0.4	0.96	ATTCTTCATTCACAGACCACCTGATATATCATGCAATTAATTTTTATATAAGTATCCAAGTTCAGCCCCACATAGTCACATACACCACAAACAAGCGAAA	AACCTTAAAAAGTATCCATGTTCAGCTGCAATTCCTAGCTTCTTGCAAGGAGAAAACCACTTGCCTAAACTATCCCTTCCTCTTCCACTGACAACAAATA
CPSSR_210	AG	302	21|FCHL5JJBBXX_L2_wHAXPI059581-29_1_(paired)_contig_21266:62-303|+	11|LP150221_R1_(paired)_trimmed_(paired)_contig_27299:531-552|-	N/A	10|FCHL5H3BBXX_L3_wHAXPI062220-17_1_(paired)_contig_56562:192-211|+	N/A	4.97	0.4	0.92	TGCTTTTGTGTGTGTAGTTATTTGCTTCTTTTATCGATTGATCGGAGGATTTGTTATGATCTCTCTCTGCCCTAATTCTCTCGTCGTAATGATAATTTGC	ACTTTTCGTATTTTCGTTCTTTATGTGCGAGTTTTTAGCCTCCATTTTCCTCATCCATCTAGTCATTTCGTTTGAAAAGCTAATAAAAAAAAGTGATGTA
CPSSR_211	AG	304	24|FCHL5JJBBXX_L2_wHAXPI059581-29_1_(paired)_contig_299108:35-282|+	16|LP150221_R1_(paired)_trimmed_(paired)_contig_78509:1085-1116|+	24|LP161083-1_R1_(paired)_trimmed_(paired)_contig_144203:348-395|+	N/A	N/A	3.77	0.4	0.97	CCTCCAAACAAATTAGCAATAAAAAACATATATACAGTAGAAAATTAAGAAAAATGTGCAAACAATTCTAGGTTGAACAGTCGTCTTCCTCATCAAGCTA	ATTCCGCCGAGACATCTCTATTAACTAAGAAAATTGTTCAACAATCGGTTCCTTCACTCTTTAATTGCGGCAAGATCTTTCCTCCTCTCATTGTGCTATG
CPSSR_212	AG	305	6|FCHL5JJBBXX_L2_wHAXPI059581-29_1_(paired)_contig_104373:1989-2200|+	8|LP150221_R1_(paired)_trimmed_(paired)_contig_68606:649-664|-	N/A	6|FCHL5H3BBXX_L3_wHAXPI062220-17_1_(paired)_contig_151505:403-414|-	N/A	0.94	0.4	1	TAGTTTGCCCATACTGCTCAACAACTGTCTTGCATTCCTGGCTAACAACTCCGGAGGCTCCAATGGCATGATTTATCATGGTAATTATAGTCTACACCAC	TCCCCAGGAATTAAGGAAACCAAAACATTCATAGTTATAGAAAAATGCATATTACAGGCCTGAGACCACGAGACTATCTCAGGCCCGCTTTCAGTGTAAT
CPSSR_213	AG	306	6|FCHL5JJBBXX_L2_wHAXPI059581-29_1_(paired)_contig_108620:69-280|+	N/A	N/A	5|FCHL5H3BBXX_L3_wHAXPI062220-17_1_(paired)_contig_268140:160-169|-	5|TCunknown-1_(paired)_contig_159360:127-136|+	0.47	0.4	1	TCCTATAATTCGTGTAATTTGAGACGACGTTACCTAGCTCTGAGCCAAAATGCCATGAGGATGAGAGAAACCCTATCTGTGTAGGCTTGAAATTTCAAGA	GAAGAAAAAGAAAACGGTTTTGATGGAGTTTACGCGGTAACTGCAAATAAGTTATCATATGGAGTTTTCCCGCGTTTTTATTTAACTACTTTCCCGTTAG
CPSSR_214	AG	307	6|FCHL5JJBBXX_L2_wHAXPI059581-29_1_(paired)_contig_124198:126-337|+	5|LP150221_R1_(paired)_trimmed_(paired)_contig_132514:99-108|+	5|LP161083-1_R1_(paired)_trimmed_(paired)_contig_145803:732-741|-	4|FCHL5H3BBXX_L3_wHAXPI062220-17_1_(paired)_contig_275132:357-364|-	3|TCunknown-1_(paired)_contig_78193:350-355|-	1.02	0	1	CTCAGTCATTCGCTCCATTTCCATGATCACCAATTCACACTTTTCCAAAATCGATTACACATATATGAATTTAGACAGAGAAAGAGGAGAGAGAAAGAGA	ATGAAGAACAGAGAGGATTGTTTATGAACAGATCGATGGAATTTCTGTAAGATAAAGATGGAAACCCTAGCCCTAATTTTTTCTTGACGATGATGGAGAT
CPSSR_215	AG	308	6|FCHL5JJBBXX_L2_wHAXPI059581-29_1_(paired)_contig_124520:156-367|+	7|LP150221_R1_(paired)_trimmed_(paired)_contig_116607:559-572|+	8|LP161083-1_R1_(paired)_trimmed_(paired)_contig_53890:252-267|+	N/A	N/A	0.82	0.4	0.97	AGTGTGAAGAAGAAGCCGCTCAGTCTTCTTCACATTCTATCTGCAACTTTTTTCTGGCTTTTCTAGAGAGAGAAACTATATTTATTACTACTATATATTT	CGTGCTGGGACGTGTATGCAGGTAGAGAGCTATTTATCTTACAAGAGTAATTAATTTTTTCTTCAATTAGTTGACCCGTGAAGACGGTAGTATTAACTTA
CPSSR_216	AG	310	6|FCHL5JJBBXX_L2_wHAXPI059581-29_1_(paired)_contig_128560:290-501|+	N/A	16|LP161083-1_R1_(paired)_trimmed_(paired)_contig_126088:316-347|+	13|FCHL5H3BBXX_L3_wHAXPI062220-17_1_(paired)_contig_143438:435-460|-	N/A	4.19	0.4	0.94	AGGATACTGTTGTAGTAAATCCTGTTGAAAGCAATGTGTCCAAGGAAAAAAACATCTAGAACTTGAATGGCGGGTGTGTGTGTAAGAGAGAGGGAGAGAA	CACAAAACAAATCAAATGCCAAAAGAAGTTGAGATTCACTTTATAAAAAGGTGAAATACCTGATTCCGATATGAATAGAAGTCATTGCAACCTAAGATTG
CPSSR_217	AG	311	6|FCHL5JJBBXX_L2_wHAXPI059581-29_1_(paired)_contig_134608:837-1048|+	7|LP150221_R1_(paired)_trimmed_(paired)_contig_63153:1244-1257|-	6|LP161083-1_R1_(paired)_trimmed_(paired)_contig_203498:128-139|-	N/A	6|TCunknown-1_(paired)_contig_99813:401-412|-	0.43	0.2	0.99	ATGAAGAATATAGTATATAAAAGAAGCACTTAAAAACTCCAAAATCGAGCACAAAAAATTGAAAGTAGAGATGCATGAAGAGATAGAAAAAGAAAAGAGA	AAAGAGAGTGAAGATGCTGAAACTAATTAAGCATACTGAGGAAGCTGTTGACGAAAAAGCAAATATCAGCCACAAGGAAAAATGCTAACGTGGCAAGCTA
CPSSR_218	AG	315	6|FCHL5JJBBXX_L2_wHAXPI059581-29_1_(paired)_contig_157358:146-357|+	7|LP150221_R1_(paired)_trimmed_(paired)_contig_11138:696-709|+	7|LP161083-1_R1_(paired)_trimmed_(paired)_contig_45330:251-264|+	N/A	N/A	0.47	0.4	0.99	ATTATTTTATGTTTAACATCTCTTCCTCTTCCTCTTCGAGTATTGACTGAGGAGAGTGCGAGAGAAGAAATCTGGTGAATCAATGAAGCATCTTTGGCCA	TGAATGAATCGGTTCTGAACTATTAGAAAATTTGTTGTCAAGTGGGAAATTGTAATCTAAATCTAGTACAGTAAATACACCAAATAATATTGTCCGCCAC
CPSSR_219	AG	316	6|FCHL5JJBBXX_L2_wHAXPI059581-29_1_(paired)_contig_157732:347-558|+	6|LP150221_R1_(paired)_trimmed_(paired)_contig_231398:268-279|+	6|LP161083-1_R1_(paired)_trimmed_(paired)_contig_161872:111-122|+	5|FCHL5H3BBXX_L3_wHAXPI062220-17_1_(paired)_contig_109048:517-526|+	6|TCunknown-1_(paired)_contig_36080:184-195|-	0.4	0	1	AAAAGTATAAACTAGTTCAAGTAAGTTTATAAACAACAAGAATAACCTGCTAGTTATCTGACTAAAAAGTGTGTTTCTGCGAATTTTTCTTTTTTCTTTA	GGGCGGGGGAGGATTTAGCTTTGCTTTATATGCTGTAATTCTTTGGAAAGAAGCAATAAATCAAGAAATAAATGGAACGTGAGAAAGCACAAACCTTTGT
CPSSR_220	AG	317	6|FCHL5JJBBXX_L2_wHAXPI059581-29_1_(paired)_contig_160671:176-387|+	N/A	N/A	6|FCHL5H3BBXX_L3_wHAXPI062220-17_1_(paired)_contig_247386:256-267|-	5|TCunknown-1_(paired)_contig_525:259-268|+	0.47	0.4	0.99	CTCTAGAACGAAATTAACATAAACACCATAATGATCAAAGATTATACCGAAAAAATGAACTTGGAATATCTCAGCCTCTAGAAGAAAAACGTCTAACAGT	TATCAGACTGCAAAACAGAAATTGCATGGGAAACAAGAGGAAAATGAATCAATATTTATAGTACATCTAAACCCATGCATGGCAAATTGGACTTGTAAAA
CPSSR_221	AG	318	6|FCHL5JJBBXX_L2_wHAXPI059581-29_1_(paired)_contig_166385:207-418|+	5|LP150221_R1_(paired)_trimmed_(paired)_contig_29485:1312-1321|-	5|LP161083-1_R1_(paired)_trimmed_(paired)_contig_80891:1982-1991|-	5|FCHL5H3BBXX_L3_wHAXPI062220-17_1_(paired)_contig_88005:276-285|-	6|TCunknown-1_(paired)_contig_46217:554-565|+	0.49	0	1	TGAAAACAGGAAAATGTAATTGTTGACCAGTAGTTTGTGCATCAAGATGTATTTGAAAAATAATTACGATACATATACACACAAGCTGTTATTTTAAGCA	ATGCATATGATGGTGGTTTATTTCAGATGGATGCAGTAAAAGTTAAAAATATAATAACTTGGAAGTTGGAACCCTGCTCTTTCCCATACGTTAACACAAG
CPSSR_222	AG	320	6|FCHL5JJBBXX_L2_wHAXPI059581-29_1_(paired)_contig_172887:7-218|+	10|LP150221_R1_(paired)_trimmed_(paired)_contig_180557:332-351|-	N/A	5|FCHL5H3BBXX_L3_wHAXPI062220-17_1_(paired)_contig_288591:311-320|-	N/A	2.16	0.4	1	TGATATTGTGGATTGTAATCTGGAAATGGTGATTTTGATGGTGGTGGTGATGATGATTGTAGGGTTTGAGGAGGTGAGAGAAAGAAGGATAGAGTTAGTT	TTGTGAAAGTGTAATGTCTTTTGACGGAGAAGAGAAGCAATGGAGTTGTGGAAAAGCCGGGACAGTGAATTTGCAAATAGTCAGTTCTATTGTCCGAGAT
CPSSR_223	AG	323	6|FCHL5JJBBXX_L2_wHAXPI059581-29_1_(paired)_contig_180448:184-395|+	7|LP150221_R1_(paired)_trimmed_(paired)_contig_249801:183-196|-	N/A	6|FCHL5H3BBXX_L3_wHAXPI062220-17_1_(paired)_contig_269308:160-171|-	N/A	0.47	0.4	0.99	ATGGTGACACAATCAAGAAGAGGTTATAGTGTTATACTGTTTTGTCCTTAATGCATAATTTTGACTTGAGACACTGTAGTAAGGAGAGAGACTGCGAGAA	CCGGCTGTCCTGGCCTTATTATAGTATAATATACAGACAATACAAAGAATTACATACAAATGGCATATACACATGTAATCATGAATAGGACGAAGATTAC
CPSSR_224	AG	324	6|FCHL5JJBBXX_L2_wHAXPI059581-29_1_(paired)_contig_183074:565-776|+	8|LP150221_R1_(paired)_trimmed_(paired)_contig_69738:421-436|+	9|LP161083-1_R1_(paired)_trimmed_(paired)_contig_48311:384-401|-	N/A	N/A	1.25	0.4	1	CCAATACCCAGATCAAAACAACGTTAGACAAACAAAATAGGCACACTGCACACATATATGTGTATATCATATCAATCAGTATAGATACACAAACAAATGT	ACCGAGGTCGGAGGAATCGAGAAGAGAGGGTTTGATGTGAGAGTGCCACCAACAGAGAGAGAATTTGGAGCAGCGAGCTCCCATTGGTGAAGAAGATGAA
CPSSR_225	AG	328	6|FCHL5JJBBXX_L2_wHAXPI059581-29_1_(paired)_contig_201912:109-320|+	5|LP150221_R1_(paired)_trimmed_(paired)_contig_3324:1604-1613|-	6|LP161083-1_R1_(paired)_trimmed_(paired)_contig_83823:719-730|+	6|FCHL5H3BBXX_L3_wHAXPI062220-17_1_(paired)_contig_117521:1094-1105|+	5|TCunknown-1_(paired)_contig_66620:439-448|+	0.49	0	0.98	AGTTTCAACCAATAGGTGGGTGTGCTTGTTGAATTGATTAAGCAGAGCAAAATAGTTAAGCTGTGGGATATAATGGCACCCCAATTACAATGGGATAGAT	ATGGCAAGACCAATTAGGTGCAGTCTGAAATTGAAGAGCGGAATCAAGATTTCTTGTGAGGGGAAGCACACTTAAATATCCTAGGTGCACTATGAAATTA
CPSSR_226	AG	329	6|FCHL5JJBBXX_L2_wHAXPI059581-29_1_(paired)_contig_20271:111-322|+	5|LP150221_R1_(paired)_trimmed_(paired)_contig_229788:258-267|+	5|LP161083-1_R1_(paired)_trimmed_(paired)_contig_73327:1112-1121|-	N/A	N/A	0.47	0.4	0.97	TAATTACTCTACTTGTGATGGGGTCCGCCTTCTCTAAAATTCCTTTGATGAGAGAAAGAGAGTAAAGAGAAGAGAGAGGAGAGAGGAGAGAGTAGAGAGC	TGATTTCAGGAGGTACATCTCATTATGACTTTTTCTCTTTACATTAGTCTTAGTGAGATGTACCCCCTAAATTCACTCTCTGTCCTTCTTAGATCTCTTG
CPSSR_227	AG	330	6|FCHL5JJBBXX_L2_wHAXPI059581-29_1_(paired)_contig_213052:702-913|+	6|LP150221_R1_(paired)_trimmed_(paired)_contig_119988:194-205|-	6|LP161083-1_R1_(paired)_trimmed_(paired)_contig_106744:1529-1540|+	5|FCHL5H3BBXX_L3_wHAXPI062220-17_1_(paired)_contig_34798:534-543|+	5|TCunknown-1_(paired)_contig_39789:1410-1419|+	0.49	0	1	ATCACAGCAAGACCTGTAAATACAGCAACAAATAGAATTTAAGGCTCACTCGAAATACAAACATCCACCAGCTCATATTCACACACAAACACACACACTC	ACAAACCATATGCGTTGCCAATCGTATCAGTGTCTCTAATTCCGACAACGACAGCAAGACACAGTACCATCAAAGTCCAGTTCGCCTCTGGTATATAAAT
CPSSR_228	AG	332	6|FCHL5JJBBXX_L2_wHAXPI059581-29_1_(paired)_contig_22041:740-951|+	N/A	N/A	7|FCHL5H3BBXX_L3_wHAXPI062220-17_1_(paired)_contig_205189:258-271|-	6|TCunknown-1_(paired)_contig_83571:3962-3973|+	0.47	0.4	0.97	ATTCTAGGGTTTTTACGGAATGGTTTTGGATTTGGGGTGAAAGAGGGTGGTGATGGGTGGTACAATGAAGACGATGCCGCCATGTCTGGAGGAGAGAGAA	ACGAAAATGAAGGTGAGAGATTGTGCTATAAGTAGGAAATAACCTGGATCATGTATGGTGATTCATTTAGTGTCATTATTCTAGCCTAGCCCGAATCAAG
CPSSR_229	AG	333	6|FCHL5JJBBXX_L2_wHAXPI059581-29_1_(paired)_contig_223889:144-355|+	5|LP150221_R1_(paired)_trimmed_(paired)_contig_178495:1146-1155|-	N/A	9|FCHL5H3BBXX_L3_wHAXPI062220-17_1_(paired)_contig_88019:827-844|-	N/A	1.7	0.4	0.99	TCTTTATCGAGCACGCTACTTGTCAGACAATTAGGAGAGAGAAAGAGGAGAGAGAAAGAGAGAGAGTAGTGCAATAAAACAGAGAGATATAGAGAGAGAA	CGAAGGAGTGGGGAGTTTCCGCCTCTCTCTCCGACACTCTGGTTTGATGTCTCTCTCTTCAGGCCCAATGAAAGAGAAAAAAGGCCCCTCTCTCTGATGG
CPSSR_230	AG	334	6|FCHL5JJBBXX_L2_wHAXPI059581-29_1_(paired)_contig_228077:8-219|+	6|LP150221_R1_(paired)_trimmed_(paired)_contig_189794:439-450|-	7|LP161083-1_R1_(paired)_trimmed_(paired)_contig_130853:509-522|+	N/A	N/A	0.47	0.4	0.98	ATGCTGGTCCAGAATCTCCAGCAAGTGGTCCCTCCTGTTTCATTTTCAGTATGAATTATGTTAGTTAACAAGACAAGCACAAAGGGGGAGAGAGTTTTTT	AAAGAGGGGTTTGCCCATCTGAGCTTATTCAGAATATTTCTCACCATAACAGTTATTTCCCATAGAGAAAAAAGTTGAGGGAGGGGTTTACCCCCACCAG
CPSSR_231	AG	338	6|FCHL5JJBBXX_L2_wHAXPI059581-29_1_(paired)_contig_238394:136-347|+	7|LP150221_R1_(paired)_trimmed_(paired)_contig_157288:850-863|+	6|LP161083-1_R1_(paired)_trimmed_(paired)_contig_71300:611-622|+	N/A	N/A	0.47	0.4	0.99	CTCTTCAGTAAGTACAACATAAGCAAGCCAAACCCACAAGCCGGTGCTTGCATGCGCCAACACACTTGAGATATGCCGTGTGTGTTTTTATTGTGGAGAT	TACCTGCTTTCCTTCCTCAGGTCAAGTGGCATGAAGCTCACCATGCTATACTCATCAACCTAAAATAACACTCAAATGATCAAAGCAACACTCAATGTAG
CPSSR_232	AG	339	6|FCHL5JJBBXX_L2_wHAXPI059581-29_1_(paired)_contig_240017:591-802|+	6|LP150221_R1_(paired)_trimmed_(paired)_contig_125211:155-166|+	N/A	3|FCHL5H3BBXX_L3_wHAXPI062220-17_1_(paired)_contig_267076:137-142|-	6|TCunknown-1_(paired)_contig_112983:239-250|+	1.3	0.2	0.92	CCGCCGACGACGGGAAGCCACCACCACGAAGGGCTCTTGGTGACTAGCTCCATCGATGGCGGCAAGAAGCTGGATCTGGATCTGGTTTTGTTCACGGTTT	TGGTCCCTTGGGAGACCCTATTCGCGCTCCATGAAAGTCGTCCCGCACTCCTCTTTTTATTTTATGGATTGAAATGCCCAATTTGCCCTTTGAAGGAAAG
CPSSR_233	AG	341	6|FCHL5JJBBXX_L2_wHAXPI059581-29_1_(paired)_contig_242658:442-653|+	5|LP150221_R1_(paired)_trimmed_(paired)_contig_219968:803-812|+	5|LP161083-1_R1_(paired)_trimmed_(paired)_contig_114822:606-615|-	N/A	N/A	0.47	0.4	0.99	AAGCCTTCTGTCAAACACAGATCTTTGTTCCTGATTACTTTTCGAAGTGGCAAAGTCTGATTTAGTTTTTTAAAATTTTTCAGAATGTGTCGTCTGGGAC	ACAAACAAAGACCACTCGCATCTTAGGGTATTTTGCCCAAAATGGATGCCTATTCTTTTTCTTTTTTTTAATAATTTTAAAAATATTATATCCTTCCAAA
CPSSR_234	AG	342	6|FCHL5JJBBXX_L2_wHAXPI059581-29_1_(paired)_contig_247771:4-215|+	N/A	6|LP161083-1_R1_(paired)_trimmed_(paired)_contig_148208:349-360|+	7|FCHL5H3BBXX_L3_wHAXPI062220-17_1_(paired)_contig_114706:362-375|+	6|TCunknown-1_(paired)_contig_27605:739-750|+	0.43	0.2	1	TAAGTGTCAATAAAATTGGGCTGGTTGGAAAATCAGCATGATGGCGAATCAGTAATTTGTTGTGGGTGTGGGTGACTGTGTTGAGACTTGAGAGAGAGAT	CATTACATGGCCATCAGTATCCACTAGAATATTTTCAGGTTTCAGATCCCTATGCATTATTCCATTTGCATGGAGATGGGAAACTGCAGAAACAATTTCA
CPSSR_235	AG	343	6|FCHL5JJBBXX_L2_wHAXPI059581-29_1_(paired)_contig_248133:47-258|+	7|LP150221_R1_(paired)_trimmed_(paired)_contig_78231:1308-1321|-	N/A	7|FCHL5H3BBXX_L3_wHAXPI062220-17_1_(paired)_contig_195040:350-363|+	N/A	0.47	0.4	0.99	TTATATTACTGTAGCAAAAAAGCTCATCAAAATTTAGGCCAATAAAATCTGATCCCCTATTTGATGACTGCTGCTAATTAACATACAGAGTGAGGGAGAC	AACAACCGAACAATAGATACTTTGATAATAAATTTTACAACAAGAATCGTTTATTCAAGCTCACATGACGGTTAAATCACAACTACATGTATGGCAACTC
CPSSR_236	AG	344	6|FCHL5JJBBXX_L2_wHAXPI059581-29_1_(paired)_contig_259816:414-625|+	N/A	5|LP161083-1_R1_(paired)_trimmed_(paired)_contig_24586:1060-1069|+	5|FCHL5H3BBXX_L3_wHAXPI062220-17_1_(paired)_contig_254038:95-104|+	5|TCunknown-1_(paired)_contig_29204:454-463|+	0.43	0.2	0.94	TCCTCTTTCTCTCTAAAACGAATGCAAAAATAAAGGGACGAATAGCCATAACCAAACCACAACCAACAGACACACAAAGAAGAAGAAGAGAGAGAGTTTT	AAGAGAAAATGTCGTGGCAAACATACGTAGACGATCATCTGATGTGTGACATCGACGGCGGAGGCCACCTCACTGCCGCCGCCATCATTGGCCATGACGG
CPSSR_237	AG	345	6|FCHL5JJBBXX_L2_wHAXPI059581-29_1_(paired)_contig_268210:229-440|+	7|LP150221_R1_(paired)_trimmed_(paired)_contig_91291:534-547|-	7|LP161083-1_R1_(paired)_trimmed_(paired)_contig_81889:617-630|-	N/A	N/A	0.47	0.4	0.99	ACATTATCCAATTTGATTAATTTTTTGCAAGAATGATTATAATTCATAAATTAAAAACTGTACTGTATGTGGAGAGAGGGAGAGAGAAAAATGAAAATGT	AAACTTAGGAAAGGGAATGAGGTCAAGAAAATGAATCTTCTTACATTCTTGTCACGTGTTTACAACTATTTATATAATTAAACTATAACTAACAAACTAT
CPSSR_238	AG	347	6|FCHL5JJBBXX_L2_wHAXPI059581-29_1_(paired)_contig_2727:1742-1953|+	6|LP150221_R1_(paired)_trimmed_(paired)_contig_28081:539-550|+	6|LP161083-1_R1_(paired)_trimmed_(paired)_contig_202289:304-315|+	5|FCHL5H3BBXX_L3_wHAXPI062220-17_1_(paired)_contig_156481:1270-1279|-	N/A	0.43	0.2	0.99	AACTAAACAAGTTAACATCTACACTCAGAATAGAAGCTCTTCATACTCAAACGGGTAACTTAAGCTCAGTTTGAACACAAACAAGAAACAGAGAACACGA	TGAGTGTAATGACAGAGAAACAATTATCTCATTCAATCTGTGTTAGCTGTACATTCAGGTATAAATAGTATTAACTACCTAACTAACTAAAGTTTGTTAC
CPSSR_239	AG	348	6|FCHL5JJBBXX_L2_wHAXPI059581-29_1_(paired)_contig_277:2553-2764|+	6|LP150221_R1_(paired)_trimmed_(paired)_contig_51884:123-134|-	6|LP161083-1_R1_(paired)_trimmed_(paired)_contig_8168:1826-1837|+	N/A	8|TCunknown-1_(paired)_contig_5305:179-194|+	0.87	0.2	0.98	CGAAGAATCCAGCAGATATGTTTACCAAGGCGGTGACAACAGAGAAGTTGAAGCTATGTATGGCTTCAACTGGGCTTCCAGAAACTTGAAGAGGAGGCGC	ATAGTTTGGGTTTACAGAAGGTGCAGGTCATTGGATGGCAGTTGAATGTTGATCAAGCCTCCAAGTGGGAGATTGTTATGTTGTGGAGACTGATCATTGA
CPSSR_240	AG	350	6|FCHL5JJBBXX_L2_wHAXPI059581-29_1_(paired)_contig_28568:698-909|+	N/A	7|LP161083-1_R1_(paired)_trimmed_(paired)_contig_182771:775-788|-	N/A	7|TCunknown-1_(paired)_contig_39368:121-134|-	0.47	0.4	1	AAACACAACCAAAAAGGTATCCCTTTCTTTGAATCTCTAAACCGCAACGGATCTTCATCTGAATATCAAGAATTTCAACTCCTTAAACAACACAACATAC	ACAGAAATTTCCTGAAGTATCCTGATGGCTGACCTGTTCCGTTACGAGACTTGAATATTGCAATGTGCTTGCCCACTTCTAGATTTATGCTCAGGTTAAG
CPSSR_241	AG	353	6|FCHL5JJBBXX_L2_wHAXPI059581-29_1_(paired)_contig_29092:6-217|+	5|LP150221_R1_(paired)_trimmed_(paired)_contig_26694:1064-1073|-	N/A	N/A	6|TCunknown-1_(paired)_contig_64232:407-418|-	0.47	0.4	0.97	TGATATTGAAAACATAGATTAAATAACCCAGATCACATTCGACATTAACCAGATCGTCGATTTTGGTGCTGCGACATTTTCGACATGGTTTATGGGTTTT	TAGCGAAGGGGATGATGGATGGTGCTGCGATGATCTGGTTCATGTCGCCGGAGATGCCGATCACTGACTTGTCATCGTTGTTCGGTCATCGTCAAAATGA
CPSSR_242	AG	354	6|FCHL5JJBBXX_L2_wHAXPI059581-29_1_(paired)_contig_30534:952-1163|+	6|LP150221_R1_(paired)_trimmed_(paired)_contig_136433:1087-1098|+	5|LP161083-1_R1_(paired)_trimmed_(paired)_contig_68450:551-560|-	N/A	N/A	0.47	0.4	0.99	GTTTATCTGCTAGCCTGAACATAAAAATGTTGAGCCGCTATAAAAGAGGTTTCATAATCTGAAAGTAAGACAAACTACTTATGCAGGTAAGCAAGTGGTC	GGATAGGTGAGCATATACGTCATATAGACACAGAAATGAAGACATAATATCAACAAAAGAGAAGATATAACATGCTCACCCACTGAAATAAGATAAGTGA
CPSSR_243	AG	357	6|FCHL5JJBBXX_L2_wHAXPI059581-29_1_(paired)_contig_33238:488-699|+	7|LP150221_R1_(paired)_trimmed_(paired)_contig_134471:752-765|-	7|LP161083-1_R1_(paired)_trimmed_(paired)_contig_80188:1594-1607|+	7|FCHL5H3BBXX_L3_wHAXPI062220-17_1_(paired)_contig_108752:418-431|-	7|TCunknown-1_(paired)_contig_62264:128-141|+	0.4	0	0.98	CTATCAGGAGGTTAGTCCTAATCCATCCTCAAGTTTGTGGCATGTTCAGTATCAATATGGGCATGTTACAAAAAATACTTGACATATTCAACAAGCAAAC	AAAAGGGAGGCTTACAGCTTAAACTTTGAACTGGCTCTCTTAAATTGTCATTGACATAAACCGACTAGAACCAAGAAGTCAACTTTGCCGCAAGCCATTG
CPSSR_244	AG	358	6|FCHL5JJBBXX_L2_wHAXPI059581-29_1_(paired)_contig_34423:534-745|+	6|LP150221_R1_(paired)_trimmed_(paired)_contig_140005:599-610|-	6|LP161083-1_R1_(paired)_trimmed_(paired)_contig_204865:1637-1648|-	7|FCHL5H3BBXX_L3_wHAXPI062220-17_1_(paired)_contig_10837:569-582|-	N/A	0.43	0.2	0.98	GAGAAACCAAAGCACGAACACGAAGATCAAAATCCATACATATATACATATATATATACATATCGTGTTTATACACACACATTTGATTACGTATATATAT	CACGAACGAGTTTCAATCATGGCTAACATTTGCGGAGAGGAGAGAGAGAGGTGTTCTGTTTCTAGGGCTTGTTTAAATTGAAGGAACGGTATTGTTCAAA
CPSSR_245	AG	360	6|FCHL5JJBBXX_L2_wHAXPI059581-29_1_(paired)_contig_4408:464-675|+	5|LP150221_R1_(paired)_trimmed_(paired)_contig_217768:380-389|+	5|LP161083-1_R1_(paired)_trimmed_(paired)_contig_190813:127-136|-	N/A	N/A	0.47	0.4	0.98	GTGATGGCTGGTTCGGCTCCTAGTGCCCCATGCCTCTTTTAAAAACCCAATTTTCGAATTGGCTTGGCTTGCTTGTGCATTTTGCTCCAAAACACTTTCT	GTATGAAATTGAACTTTTTGAACACCCATAAGCTCATTCCATTGCTTGAATCTTACTAAATCATCTTGAGAATCATCACATCTTAGAGAGAGAAAGTCTC
CPSSR_246	AG	361	6|FCHL5JJBBXX_L2_wHAXPI059581-29_1_(paired)_contig_45188:99-310|+	N/A	5|LP161083-1_R1_(paired)_trimmed_(paired)_contig_48122:1506-1515|-	5|FCHL5H3BBXX_L3_wHAXPI062220-17_1_(paired)_contig_124517:296-305|+	5|TCunknown-1_(paired)_contig_12980:2246-2255|-	0.43	0.2	0.99	AGTAGGTAATATTTATGTAATATGAACACACATACATGTATAGTCTACTCTTTATGATTTCACTTGATGACCTAAACTGTTCAGTGTTAGCACAGTGAAC	ATGAGAATGGAGTAAATGAATATGTGAAACACGTCAAACTGGCTCATCAGATACAACTACTAAATGGATCTCGCTCAATAACTGAGTCGTATCCCATCCT
CPSSR_247	AG	364	6|FCHL5JJBBXX_L2_wHAXPI059581-29_1_(paired)_contig_54941:494-705|+	6|LP150221_R1_(paired)_trimmed_(paired)_contig_108540:316-327|+	7|LP161083-1_R1_(paired)_trimmed_(paired)_contig_115225:123-136|-	N/A	10|TCunknown-1_(paired)_contig_67830:541-560|-	1.64	0.2	0.99	AAGATCTCATAACCTTTCAAGCTTGGAAGAGAATGTCAGACTGAACAGAGCATGACCTTGCAAGCTCGGAAGAGCATGTCGATGTTTATGCTTTTATGAA	ACACAGGATTTTTTTTAGAGAGAGAATGAAGGAGGTGGGAGAGAGAAGTTCATGTTTGATTTCTTTTTCTATCCCTCACAAAATTTTGACACAAATAAAA
CPSSR_248	AG	365	6|FCHL5JJBBXX_L2_wHAXPI059581-29_1_(paired)_contig_60002:283-494|+	3|LP150221_R1_(paired)_trimmed_(paired)_contig_17751:198-203|+	6|LP161083-1_R1_(paired)_trimmed_(paired)_contig_66247:147-158|+	6|FCHL5H3BBXX_L3_wHAXPI062220-17_1_(paired)_contig_87177:481-492|+	6|TCunknown-1_(paired)_contig_13533:98-109|-	1.2	0	0.97	CCTAACCCAAAAATTTGGGCAAGCCCTTTGCCCACCTGTTTTCTGCCTTGGCCGAAAACACACCACCCTTGCCCATTTTCCCTTGCTGCTGTCGAGACCA	AATAAGATTTTGCTCCATTGCCACAACCATACACCACCACATCAACCACCACCCTTCACTACTTCATTTACCACCTATTCCACCATCAAACCACAACAAT
CPSSR_249	AG	367	6|FCHL5JJBBXX_L2_wHAXPI059581-29_1_(paired)_contig_74379:462-673|+	6|LP150221_R1_(paired)_trimmed_(paired)_contig_70683:843-854|-	6|LP161083-1_R1_(paired)_trimmed_(paired)_contig_202518:750-761|-	5|FCHL5H3BBXX_L3_wHAXPI062220-17_1_(paired)_contig_41280:1629-1638|+	4|TCunknown-1_(paired)_contig_55200:991-998|+	0.8	0	0.98	ATAGACCTCATCTTGTCATTGATCTCTGGCTGCAAACACATGTAGTCATGCACTCGGTTCTCATCCTGCATAGTATCAAAAGGGTCCATTCATGAGAGGC	ACAGAGAGTTAGATAGACAAGGAGATTTCAAATTTAATACCTCTGTAAGCTTGTAATACTTGTAGATGTCGTCGACGTATTCCACTTCAGCCAATTCATT
CPSSR_250	AG	368	6|FCHL5JJBBXX_L2_wHAXPI059581-29_1_(paired)_contig_79460:61-272|+	6|LP150221_R1_(paired)_trimmed_(paired)_contig_81494:2582-2593|+	N/A	5|FCHL5H3BBXX_L3_wHAXPI062220-17_1_(paired)_contig_71180:1094-1103|-	N/A	0.47	0.4	0.98	GACGATACTTTGGTTACAGATTGTAATGCAGGGTTCGATTTCAAGTTATTAACATTGTTTTCTGCTGGGTTTGATCTCAGTGCATGGTTTTATGGGTTTT	TTGCAGAGTGGGGGAAGAGGGCGGGGGGGAGTAAGGGTTGGAATATTCTGGTTCAAGAACCGTGCAATGAGTATGCTGCCGGAAATGCCGTCANNNNNNN
CPSSR_251	AG	369	6|FCHL5JJBBXX_L2_wHAXPI059581-29_1_(paired)_contig_80681:452-663|+	N/A	3|LP161083-1_R1_(paired)_trimmed_(paired)_contig_58033:1269-1274|+	3|FCHL5H3BBXX_L3_wHAXPI062220-17_1_(paired)_contig_108174:1389-1394|-	N/A	1.41	0.4	0.97	ATGTCCTGATGATATCTATTGTCAATTATTAATTGTGTGATATTGGTTGGTTTATACAGGCAAGAGACGGTAGGAAACATGCATCTACAACCGAGGAGTC	TCACATTGCTGAGTTTGACAATGACAATGGAGAAATCACTCAAGAACCAACTGCAAAAATAAGGTTGAGGGTGAAACGTGATGGTGAATCAAGTAGTTGT
CPSSR_252	AG	373	6|FCHL5JJBBXX_L2_wHAXPI059581-29_1_(paired)_contig_8665:1071-1282|+	6|LP150221_R1_(paired)_trimmed_(paired)_contig_161073:1419-1430|-	N/A	8|FCHL5H3BBXX_L3_wHAXPI062220-17_1_(paired)_contig_76159:688-703|+	N/A	0.94	0.4	0.98	ATACTACAGTATAAATAAGCACAAATTGGTCTGTAGCTGCTTTGCAACAACTACCTATCGATTACTCCAGAAAGCGAAAGAAGAAGAAGAACAAGGTTCT	GGAGAGGGAGGAGAGAGAAAATGAGGGCAATGCCGATCGATTTCTTCGGAGACATGGAGGATCATTCATCGATGGCTATGGAGATGGACGATGTTGATCC
CPSSR_253	AG	374	6|FCHL5JJBBXX_L2_wHAXPI059581-29_1_(paired)_contig_91604:815-1026|+	5|LP150221_R1_(paired)_trimmed_(paired)_contig_40660:411-420|+	5|LP161083-1_R1_(paired)_trimmed_(paired)_contig_23093:784-793|+	N/A	4|TCunknown-1_(paired)_contig_36374:709-716|-	0.71	0.2	0.99	ACCAAAGATCCTCCATAGTGTACACAGCAGCAAGAATATTACAATCTTTAGTTAAATGACTCAGCTGAATTGAATTGTCCATGAGAAGGTTAAGCCACTC	ATGTTTGGAAAACTATCTGTTCTGAAACCCCAGCATTGGAACCAAAGAGCTCTTGCATGAGCGCAATCAAAGAAAATATGCTCAGCTGTTTCAATCTGGG
CPSSR_254	AG	375	6|FCHL5JJBBXX_L2_wHAXPI059581-29_1_(paired)_contig_93196:40-251|+	7|LP150221_R1_(paired)_trimmed_(paired)_contig_97772:1074-1087|-	N/A	6|FCHL5H3BBXX_L3_wHAXPI062220-17_1_(paired)_contig_47621:394-405|-	6|TCunknown-1_(paired)_contig_85559:590-601|+	0.43	0.2	0.98	CTGTGAATCACCGGGACGGTGGTGGCCTAATGGCCCTCCGACGATCAAGTTAGACTGGATACTAGAAAATTGTAAATGAATTTGAGTGAGAGAGTTGTCT	TTTACCCCTTTTCCTTCTATCTTTTTACTTTTATACTAGGTGCATTTTCTCCCTTTTAGAGCTTAGCTGGCACTTATCTTAGTATCCAAACAGTCTTCTA
CPSSR_255	AG	376	6|FCHL5JJBBXX_L2_wHAXPI059581-29_1_(paired)_contig_99994:405-616|+	11|LP150221_R1_(paired)_trimmed_(paired)_contig_193296:986-1007|-	N/A	N/A	8|TCunknown-1_(paired)_contig_20981:230-245|-	2.05	0.4	0.99	ATGCCAAATTGAGCATATCAAACATCAAAATTATTAACTGAATTGCTCTATGAACAAAAGTTTCTCACAACATTGCAACCAAAATTGAATCAATATTTCT	ACTCACGTAGAAGAAGAAGGGCCAAGAAGGGGATTTTCCTTAAGGGGCTGAAACGAGAACCTTCCCAAGAAATCACCAACGCAAGAGACGGAGTTCTTCG
CPSSR_256	AG	377	7|FCHL5JJBBXX_L2_wHAXPI059581-29_1_(paired)_contig_100987:211-424|+	5|LP150221_R1_(paired)_trimmed_(paired)_contig_82328:522-531|+	5|LP161083-1_R1_(paired)_trimmed_(paired)_contig_171329:588-597|+	5|FCHL5H3BBXX_L3_wHAXPI062220-17_1_(paired)_contig_180729:131-140|+	5|TCunknown-1_(paired)_contig_63189:638-647|-	0.8	0	0.99	GTCCCCATCATGAAGATTTTGGCCGAGATGCATTTCTTTATTTGGTTGTGACACTTTTTCTTACTTTATGGCACAGTATGACCCTAATGTCATTTTGGAC	GTCTTTAGACTCATTACTATGAAATAGGAAACTATAGAGAATGCTTCTCATCCTAGTAGATAGATATATAAAGATTTAGTTGTAGATCCAAGGAGATCTT
CPSSR_257	AG	378	7|FCHL5JJBBXX_L2_wHAXPI059581-29_1_(paired)_contig_102545:1567-1780|+	N/A	N/A	4|FCHL5H3BBXX_L3_wHAXPI062220-17_1_(paired)_contig_156360:516-523|+	6|TCunknown-1_(paired)_contig_55040:445-456|+	1.25	0.4	0.98	TGCTCGTCTTCATGTGCAGGGGCCACATGTTAGAGGTCATGTTAAGCTTGAAATATATTGTTGGCTCACCGAGGCAAAGTGACAGTTCAGCAGGTATGAA	ATAGCAGCAAGTAGGTATTCCTGTAGAATTGGCCAAAATGAAAGATCGACTAGGTTTACCTGTAGTTATCAGGACAGCTATGACTGCTGAAATTGTGGTA
CPSSR_258	AG	379	7|FCHL5JJBBXX_L2_wHAXPI059581-29_1_(paired)_contig_114026:647-860|+	9|LP150221_R1_(paired)_trimmed_(paired)_contig_50669:148-165|+	10|LP161083-1_R1_(paired)_trimmed_(paired)_contig_105310:118-137|-	7|FCHL5H3BBXX_L3_wHAXPI062220-17_1_(paired)_contig_179890:252-265|+	N/A	1.3	0.2	0.97	ATGAATCCAACGGCGACGATGAGTTTCTGAAGCTGTTACTCCGGCGGTTGATGTAGCTCTGATGCAACGCGGACAGCTTCATTTTCTCTCTCTAGTTTTT	ACGGTGGTGATGGAGGAATTCCGGAGAGACGTGAAGATTGCGTGATATAGGTGAGTATCAGTTGGTGGTTTAATCAAAGATTTCTTTGGGTTTACGAATC
CPSSR_259	AG	380	7|FCHL5JJBBXX_L2_wHAXPI059581-29_1_(paired)_contig_115090:423-636|+	N/A	12|LP161083-1_R1_(paired)_trimmed_(paired)_contig_44496:1696-1719|+	N/A	9|TCunknown-1_(paired)_contig_54673:627-644|-	2.05	0.4	0.97	ATCTCAGAAGTCCTGGAAAGCTGGTGAAGAACCAAAGATTGCAGCAGGTGCGTCATGCCGCTTTTGTCTACAAATTATGATTCTACTGATTGAGAGAGAC	TCTGATGATATATACTAACAATTTGATTTCTGCAGCTATTATAGAGCTTTTTCACCTGCTTCCTCATGCGGCCCACAAGTTCCTTGATGAGCTCGTAACC
CPSSR_260	AG	382	7|FCHL5JJBBXX_L2_wHAXPI059581-29_1_(paired)_contig_119444:188-401|+	7|LP150221_R1_(paired)_trimmed_(paired)_contig_102469:1293-1306|-	8|LP161083-1_R1_(paired)_trimmed_(paired)_contig_164283:96-111|-	7|FCHL5H3BBXX_L3_wHAXPI062220-17_1_(paired)_contig_156473:323-336|-	7|TCunknown-1_(paired)_contig_19329:1189-1202|-	0.4	0	0.99	TTCACTACCTTCTCAACCAACACTTGTTCCAGTAACGCTTCAATGGCTTCCTTTCTCCAAAAATAGACAAGTTCTAATAGGTAAGGCGTGGTTAGAGTTC	ACAGGGGATCATAAAAGAGAACGAAGGATAGAAGAGATTGCCCATGTCATTATTAACCTGACCCAGCTATTATTAACCTGAGATGTACCTGGTACTTTCG
CPSSR_261	AG	386	7|FCHL5JJBBXX_L2_wHAXPI059581-29_1_(paired)_contig_132047:564-777|+	6|LP150221_R1_(paired)_trimmed_(paired)_contig_75474:299-310|-	N/A	6|FCHL5H3BBXX_L3_wHAXPI062220-17_1_(paired)_contig_138896:183-194|-	N/A	0.47	0.4	0.99	GGACCAAGGGATCGGCAAAAAGGTACAGATTCTCGAGAAAGAGACAGAATCTGACCTTTCTGTCTTGGATCTCTGTAGGAAAATGATACGTTGAGAAGAC	AAAGGAATATATAATGACTAGCGGCCGGGGACTTTGTGATCGGACCGGATAGTGGTGGTTCGGACAAGAGCCGGATTTTTAGGCAATAAACTCGGACGCG
CPSSR_262	AG	387	7|FCHL5JJBBXX_L2_wHAXPI059581-29_1_(paired)_contig_13502:202-415|+	7|LP150221_R1_(paired)_trimmed_(paired)_contig_22604:2277-2290|-	7|LP161083-1_R1_(paired)_trimmed_(paired)_contig_158918:702-715|-	N/A	8|TCunknown-1_(paired)_contig_46272:1646-1661|+	0.43	0.2	0.99	TGAAGGATTTTGGCAGGAAACTAACAGAGAATGTAAGCCCACGCCCAACTAAACAATATAGGCCAAGCCCTATTCCCAAACAACCTCTGTCGTCCATTCT	GAGAGAGTGAGAGATGAAGGAAGACGATGTGATGGAGGAACAGTTTATAACATTTTGGCCGCACACCAACTATTGATTCACCAATAAAAAGCAATCAGGT
CPSSR_263	AG	390	7|FCHL5JJBBXX_L2_wHAXPI059581-29_1_(paired)_contig_149282:1733-1946|+	11|LP150221_R1_(paired)_trimmed_(paired)_contig_73100:1405-1426|-	6|LP161083-1_R1_(paired)_trimmed_(paired)_contig_113449:197-208|-	N/A	N/A	2.16	0.4	0.98	AACAAAAAAAAATTAAAAATAAAAAGACAAATCAACAGATATTTTCACAATCATCTATCTAAGCAGAACCTAAATGCTCCATTTGAATGCCAAAAATTCT	GGAGAGGGAGAGAGAGAAAGCTCATTATCATTACTTTCATGAAAATTCTATTCCAGAGAATAGTTTCAGAGAAATGAAATTTGAAATTTCGATTGACAGT
CPSSR_264	AG	391	7|FCHL5JJBBXX_L2_wHAXPI059581-29_1_(paired)_contig_15021:894-1107|+	7|LP150221_R1_(paired)_trimmed_(paired)_contig_109100:457-470|+	N/A	4|FCHL5H3BBXX_L3_wHAXPI062220-17_1_(paired)_contig_32987:2194-2201|-	N/A	1.41	0.4	0.92	AAAAGCTTACCAAAAGAGAGGTGATGATCTCGCTGCTATTCGTAGGAATGATTGGAGAAGATGTCCATGTATCTTCTCTCTAGTCGGCGTAGAGGCGGTT	ACAGACAGAGACAGAGAGAGAAGACATAAGTATAGTTCTTCGCTTAACCTAGGCAATGGGACGGAGAGGGCTGGGCTTTGTTTGGGCTTGTTTAGGGCCA
CPSSR_265	AG	394	7|FCHL5JJBBXX_L2_wHAXPI059581-29_1_(paired)_contig_202035:185-398|+	6|LP150221_R1_(paired)_trimmed_(paired)_contig_26413:4002-4013|+	N/A	N/A	5|TCunknown-1_(paired)_contig_63829:1619-1628|-	0.82	0.4	0.99	AACATATCACACTTTCTCAAAGCATTACTATTTCTGAGTGCGGGTTTGGAGATTCATGCCATGTGTCAGATAAGTAAAGATTTGCGGAAGGGAGGCTTAA	AAACCTCACGAACTGCTGTTCCAACAAAATCACCCTTGTCATCATCTAACATTCCAGCTGGCAACTCCAATATAAGCCTCCCAACAGGGACCCTAACCTG
CPSSR_266	AG	395	7|FCHL5JJBBXX_L2_wHAXPI059581-29_1_(paired)_contig_202978:260-473|+	5|LP150221_R1_(paired)_trimmed_(paired)_contig_63398:335-344|+	5|LP161083-1_R1_(paired)_trimmed_(paired)_contig_78865:688-697|+	N/A	N/A	0.94	0.4	0.99	ATCTCGGACGAGTTCTAAACGAAAAGTGGCCGGAAAAGCTTGTCGGAGTTGACGTCGGAAGTTGCAGAGAGTTAGGGTTCTTAAAATAGTAAAGTGGGGA	ATGCGCGGGTTTTTATACCCACAAACTCTTCAATTTCTGACTGAAACGACGCGCTTCAGAATAGCGCTTCTTGGTGACTGACGTGTGTCGGTTATGGTTG
CPSSR_267	AG	398	7|FCHL5JJBBXX_L2_wHAXPI059581-29_1_(paired)_contig_234815:472-685|+	N/A	N/A	8|FCHL5H3BBXX_L3_wHAXPI062220-17_1_(paired)_contig_154724:795-810|+	11|TCunknown-1_(paired)_contig_28358:2266-2287|+	1.7	0.4	0.99	TAACATAAACTAAAACATCTATAACGCCGCCCCCTATTATTTGTTAGACAAGAAAAATAGTAGCCACAACGGGTATGCTCTTCAGAGGATTGCTTCAGGA	ATTATTTCTACAATTTGATCTTCAACAAACAGAATCTCATGAACATAGAGAACTTTGAAGCTAAAATGTTTGCTTCCCATTAAGCTACCTAGATTTTTAA
CPSSR_268	AG	400	7|FCHL5JJBBXX_L2_wHAXPI059581-29_1_(paired)_contig_266009:273-486|+	7|LP150221_R1_(paired)_trimmed_(paired)_contig_43829:1299-1312|+	8|LP161083-1_R1_(paired)_trimmed_(paired)_contig_97257:228-243|-	N/A	N/A	0.47	0.4	1	GTTTCTCAAATATAATGTAATTCATTATAATACCAATACTAAACGGTCCAAATTGAAAATTAATGCAGAAGTATATAAAACCCTTAATATATAGGATCTC	AAATATGCCCAAACAGCCACAACTTAAGACTCACTAGGAGGACCACTTGTTGAACTGAGACTCATGGCAATGAGGATCAAGCCAGTCCCTAGAGGAGGAA
CPSSR_269	AG	401	7|FCHL5JJBBXX_L2_wHAXPI059581-29_1_(paired)_contig_267777:61-274|+	8|LP150221_R1_(paired)_trimmed_(paired)_contig_31515:142-157|+	8|LP161083-1_R1_(paired)_trimmed_(paired)_contig_119980:710-725|+	N/A	N/A	0.47	0.4	1	TGCTTGTGATATTGTTAGAGAGGGTAAAAATAAATTTGTTAGAGAGTAAAAGTGGGTCATTTGAAGAGAGAGAGGTAGAAGAATGGTGGTGATGTATGTT	ACTTGATATACATGGTGTGAAGTGTGTGGATGTTGAAAGAGATGGAGTTTATGGTTCAATATATATAATGTCCCTAATGGTAAATTTGATTAAGGGTGAA
CPSSR_270	AG	402	7|FCHL5JJBBXX_L2_wHAXPI059581-29_1_(paired)_contig_267893:26-239|+	10|LP150221_R1_(paired)_trimmed_(paired)_contig_123508:1439-1458|+	8|LP161083-1_R1_(paired)_trimmed_(paired)_contig_136119:2540-2555|+	N/A	N/A	1.25	0.4	0.99	AGTAGAGAGAGAGCGAGCTTGACCGGAGGAGGAGAGAGATAGACAAGCTTGTCTGCATCGGCGACAGGCGGCAGCAGAGGAGAGAGTCTTCGTCAGTGGC	ACCAAAATTTTCTAAGATCTAAGATTTTCCCCTAAACCCTAAATTTGTTCCCTTAATTTGTTAATTGGGAAAAGCTGATGTGGCTTAGTCTATGTGGCAT
CPSSR_271	AG	403	7|FCHL5JJBBXX_L2_wHAXPI059581-29_1_(paired)_contig_271601:233-446|+	6|LP150221_R1_(paired)_trimmed_(paired)_contig_15000:2059-2070|-	7|LP161083-1_R1_(paired)_trimmed_(paired)_contig_12929:1039-1052|+	N/A	N/A	0.47	0.4	0.99	CTTGCCATACTGTGTAACTGATTTGGGAAGGCTTTATATCTCTTATCTTCATTGCAGTTTGAGATGAATATGAGTGTGTGTGTGCCAGAGTGAGTGAGAA	ATGGTATGTATCTCTTATCTTCATTGCAGTTTGCCACTACCACTCATGCACCCTTTTGAACTGATTAATCTGTTGTTTTACTTTTCTTGTTCATCTTAAA
CPSSR_272	AG	404	7|FCHL5JJBBXX_L2_wHAXPI059581-29_1_(paired)_contig_28279:763-976|+	N/A	5|LP161083-1_R1_(paired)_trimmed_(paired)_contig_53023:860-869|-	N/A	6|TCunknown-1_(paired)_contig_140172:113-124|-	0.82	0.4	0.99	GGTCGTAGGGAAGTGTTTGTCCAGGTGAGCAGATTATCCTTCAACCGCTTGTCTATTCTGCAGATTATCCTACAATTCCACCATTTTATAAGAGAGAGAC	CAGAGTAACAAGTATAATGAGTGAATGAGCAAAAAACAAGAACCAAAGATCAAAGTAGAACAAAAGCATCCAGAGAATGTCTAAAGAATTTCTATACAAT
CPSSR_273	AG	405	7|FCHL5JJBBXX_L2_wHAXPI059581-29_1_(paired)_contig_289659:305-518|+	8|LP150221_R1_(paired)_trimmed_(paired)_contig_6431:848-863|-	6|LP161083-1_R1_(paired)_trimmed_(paired)_contig_182166:111-122|-	N/A	7|TCunknown-1_(paired)_contig_112585:324-337|-	0.71	0.2	0.98	TACATTTCCTTCTTTCCAAAATTTTCTTGGGAACCAAACACGAGCACATGTAAAGAATCAAAAATTGAAATCAATATATCGACAAGTAGAGAAACAGTGA	TAGTACCTGGCAGAGTTCGCGAAAAACGGAATCGGAATTGGAGTCGTTGAGGCTCTGAAGCAAGAACCGAATCTGGTCCGACAAGATTGACGAGAACGAC
CPSSR_274	AG	406	7|FCHL5JJBBXX_L2_wHAXPI059581-29_1_(paired)_contig_314652:17-230|+	8|LP150221_R1_(paired)_trimmed_(paired)_contig_111758:2233-2248|+	8|LP161083-1_R1_(paired)_trimmed_(paired)_contig_120718:309-324|+	N/A	N/A	0.47	0.4	0.98	TTCGGGTTCGGGTTGATTGCCGCCCGATTGGACTTCGAAGCGGATCGTTAGCTTCGTTCGTGTTTTCGTTTTTTTACCAGGTGAAGAAAAATTGAAGATA	ATTGGAGAAAGAAAATGGAGGAATGTAATGAAAAACTAGATATATAAGCAATCATTTGAACCGGGGGTTATGAACCGATATTGAATATGGTGGACCTGGA
CPSSR_275	AG	407	7|FCHL5JJBBXX_L2_wHAXPI059581-29_1_(paired)_contig_38268:305-518|+	6|LP150221_R1_(paired)_trimmed_(paired)_contig_60609:3071-3082|+	6|LP161083-1_R1_(paired)_trimmed_(paired)_contig_11654:2078-2089|+	6|FCHL5H3BBXX_L3_wHAXPI062220-17_1_(paired)_contig_30924:2017-2028|+	N/A	0.43	0.2	0.97	TTTGAAGGACTTAGCATAGCCATAAATCCACAACCAACAAACAAGAACAATCACTCACATACAAAGAAAATCACTCAATCAAGCACATAAAGTTATATAT	CAGAAAATTAAGAGTTTTTTATTTGGGGGAAACTTACACAAATCCGCTTCCACGATTCCTTTTGTGCGGCAGCTGCAATGACGTCTCTTCTCACCAGGTT
CPSSR_276	AG	408	7|FCHL5JJBBXX_L2_wHAXPI059581-29_1_(paired)_contig_43897:267-480|+	9|LP150221_R1_(paired)_trimmed_(paired)_contig_80205:2570-2587|-	10|LP161083-1_R1_(paired)_trimmed_(paired)_contig_69628:679-698|+	6|FCHL5H3BBXX_L3_wHAXPI062220-17_1_(paired)_contig_244520:548-559|+	N/A	1.58	0.2	1	AAAAATGCAGGCAAAATGCAATAAAGAAGCTCTTACTAAGCAACAAAACACATCCAAGTTGTAAAGAATCATAAAAATGCAGACTAAAAAAAGAAAGAAA	AATCATACACATGGGTTATGATCAAGATAGAGAACGGTGAGCGTCTCACTTGAACCAGTAACAGCCTCAACAATGCCTTCAAGTGATTCTATTTGGTTAT
CPSSR_277	AG	409	7|FCHL5JJBBXX_L2_wHAXPI059581-29_1_(paired)_contig_43966:341-554|+	6|LP150221_R1_(paired)_trimmed_(paired)_contig_25035:240-251|+	5|LP161083-1_R1_(paired)_trimmed_(paired)_contig_120197:124-133|-	N/A	N/A	0.82	0.4	0.98	GGAATAGAAGATACTAAGGATAGAACTGAAAAAATATGTTAAATATGGGGGGCAATTCCACAAATATATAAATTGAGGGGGGCATTTCAAACCTTGGGCC	AAAAAGAGAGTTGTGGGCTTGAACTGGACTCATTAAGTGGTTTAGTTTGGGCTTGATCTATAATAGTACTAAATATTTTGGTGGGGGTTGCCCTATATAT
CPSSR_278	AG	410	7|FCHL5JJBBXX_L2_wHAXPI059581-29_1_(paired)_contig_54899:566-779|+	8|LP150221_R1_(paired)_trimmed_(paired)_contig_163364:147-162|+	N/A	8|FCHL5H3BBXX_L3_wHAXPI062220-17_1_(paired)_contig_173221:497-512|-	N/A	0.47	0.4	0.99	ACAAGTTATTATGATAGTGAGAGAGAGACCTTCCACTTCTTGTCCTTCGCGTATCTACTGTTTTCTTTTAAAACCTGCAAAAAAATTCACTGAGAGAGAT	GCTATGAGTGATATTTCAAAACAAAACTGTTTTATTAACAGGGGATCCCAAAATTATCCTATGATTGAATCAAGAAGAGCCACTCATTCTGGCTGAAAAA
CPSSR_279	AG	411	7|FCHL5JJBBXX_L2_wHAXPI059581-29_1_(paired)_contig_55386:337-550|+	6|LP150221_R1_(paired)_trimmed_(paired)_contig_125175:359-370|+	7|LP161083-1_R1_(paired)_trimmed_(paired)_contig_69440:112-125|-	N/A	N/A	0.47	0.4	0.99	TTTCGATGTGGTTGATACCTCAATCAAACACTATAATTCCTGCTGGGGTCTAATGGGTTAAGAATGTTGAAAAACTAGAATTTTCTATATAGTAAGTAAA	CTTCAATCATATCAAGTTTATAATTGACATCTTAGATCATATCAACAAAACTATAATGTCAAATTAAAGAAAGAAAAATACTAAGAAGCATGCATTGTTT
CPSSR_280	AG	413	7|FCHL5JJBBXX_L2_wHAXPI059581-29_1_(paired)_contig_62668:75-288|+	4|LP150221_R1_(paired)_trimmed_(paired)_contig_151700:450-457|-	4|LP161083-1_R1_(paired)_trimmed_(paired)_contig_162142:432-439|-	N/A	N/A	1.41	0.4	0.96	CTGAAGGGGATGGTATGGAAGCTGCCATCCATGCTTCCTCATTTCCAGCTCCAAATTTTTCTACCCAGAAAAGAAAATTCCAAGAAAATGCCTGGGAACA	ACAGAACTGCTCAACTTTCTTTCTTTCTTTCTTGCTTATTTCTTGTTTGTTTCTGGGTAAATTACTTCACTTTCCCTCATTTTCCGGGAAAGTTTGGGAT
CPSSR_281	AG	415	7|FCHL5JJBBXX_L2_wHAXPI059581-29_1_(paired)_contig_74511:305-518|+	8|LP150221_R1_(paired)_trimmed_(paired)_contig_17186:1955-1970|-	8|LP161083-1_R1_(paired)_trimmed_(paired)_contig_109742:670-685|-	N/A	8|TCunknown-1_(paired)_contig_30663:93-108|-	0.43	0.2	0.98	CGACGCCGTCGAAAGTACTCCAGATCGCCGAACATGATAAGTCATCGTCATCGACATCGAAGACAGTAGACACCCACTGCAATTGTGAAGCAGATCTGGA	GAGAGCTGAAATAAGAAGGGTTCAAAATTCGAACAGTCAAAGAGGGGCTGTTTGGGTGTATGCCTCACATTTAATTTGGGTGTATGCCTCACATTTAATT
CPSSR_282	AG	416	7|FCHL5JJBBXX_L2_wHAXPI059581-29_1_(paired)_contig_82900:396-609|+	4|LP150221_R1_(paired)_trimmed_(paired)_contig_155266:624-631|-	4|LP161083-1_R1_(paired)_trimmed_(paired)_contig_84989:2319-2326|+	N/A	N/A	1.41	0.4	0.96	AAATTTTGGAGGAAGCCATGCTACATGTATGGCTATGTCAGCGGTGCATAGGAAGACACATTGAGATATCAAAACTTATAACCAGAAATAACAAACGGAC	ATTGAAGCTTTTCAATATTTTTATTTCTAATGGCTAAAGAAATTGGGTGAAAGAAATAAGTTAGTGGATGTCACGGTGGTGGTTAGGGAATGAATTTTAA
CPSSR_283	AG	417	7|FCHL5JJBBXX_L2_wHAXPI059581-29_1_(paired)_contig_84865:784-997|+	5|LP150221_R1_(paired)_trimmed_(paired)_contig_71581:770-779|+	5|LP161083-1_R1_(paired)_trimmed_(paired)_contig_116386:430-439|+	6|FCHL5H3BBXX_L3_wHAXPI062220-17_1_(paired)_contig_272920:283-294|-	6|TCunknown-1_(paired)_contig_96344:571-582|+	0.75	0	0.99	TTAGGGTTTTGTAGCAAAATTAGAGAATTCACCTCATCTTCGATGTCTTTGATTTTCTGCATCACAGTCGCCATTGTTGCGAACCAGGAAGGAAGATTCT	TGTGTGTGTTTCGAGTTCTCACGAGGTATAGACCGGTGTGTGATTGGGATTTGGGGGTATTGATGATTGTTTGAACTGGTTTTCCAAAGTGTGGGAAGAA
CPSSR_284	AG	418	7|FCHL5JJBBXX_L2_wHAXPI059581-29_1_(paired)_contig_88630:723-936|+	5|LP150221_R1_(paired)_trimmed_(paired)_contig_84676:1439-1448|-	5|LP161083-1_R1_(paired)_trimmed_(paired)_contig_155298:587-596|-	N/A	3|TCunknown-1_(paired)_contig_55647:987-992|-	1.41	0.2	0.99	TCTTTTGGGAGGCAACTTACGCAAGATGAAGAGAACAAGAGCCGAAGGAAGGATCTCGACCAGCTGTTTTTAGCAATAAAAAAACTTGTAAATTTCTATA	ACAATTGAGCTTTATGGAATATACATGCTTAGTAGCATACCATGTAATATATCAAGTTCAAAACTGGATGATCCAACACGTCAAGTGATGCATCTGAATC
CPSSR_285	AG	419	7|FCHL5JJBBXX_L2_wHAXPI059581-29_1_(paired)_contig_90778:421-634|+	5|LP150221_R1_(paired)_trimmed_(paired)_contig_144352:448-457|+	N/A	N/A	8|TCunknown-1_(paired)_contig_106261:338-353|-	1.25	0.4	1	AACTATAATTGACAAGTCCAACCAAACCAGAATCGAGAAGTACCTATGATAGTAACATCAAAATAAGAAATGTCTTTTGATGGAAGCAAGAACTAAAACC	AAAATTATACCTGCCTCACAATGTCATCAACCTCCTGGCACATAGCCTCAAACTTTTGGTATATGTTCCCAGCCCAGGCTCTACCTTTGAGTTTAAAATC
CPSSR_286	AG	421	7|FCHL5JJBBXX_L2_wHAXPI059581-29_1_(paired)_contig_98554:1371-1584|+	6|LP150221_R1_(paired)_trimmed_(paired)_contig_205213:123-134|+	7|LP161083-1_R1_(paired)_trimmed_(paired)_contig_101724:210-223|+	N/A	N/A	0.47	0.4	0.99	AACTGATGATCTTCGGCCACATCACATTCTGCTTCCAAATTCGGCATAAAATTTATTTTCGATTTATTTATTTTGGTGTGGTGTGTGTAGAGAGAGAAAT	ACGACGCACCATTGGTTGGGTCCTTCATGCAATCAAATAAACCAGAATTCCAAGGTTGAGTTGGCACTGGTGCTTGACTAATATTGTTCTGGTTTACTTG
CPSSR_287	AG	422	8|FCHL5JJBBXX_L2_wHAXPI059581-29_1_(paired)_contig_101672:739-954|+	7|LP150221_R1_(paired)_trimmed_(paired)_contig_53549:349-362|+	10|LP161083-1_R1_(paired)_trimmed_(paired)_contig_72787:1549-1568|+	N/A	N/A	1.25	0.4	0.99	AAATCATTAAATTTCATGTTGATCCAGCTGGAAGAAGTCATTCTTTAAAAGGAGAGGATAAAATAACCCTTGACATGGGAAGTGTTCATTAGGTTTAAGC	ATGCTTAAGAAAGAACGGCTGAGGTGGGAGGACCAAATGAATGAAGGACTTATTCAGCATGGTCTTTTCAAGTCAGGAAGAGGAGGGGGTGTACACATTG
CPSSR_288	AG	423	8|FCHL5JJBBXX_L2_wHAXPI059581-29_1_(paired)_contig_107151:173-388|+	N/A	N/A	8|FCHL5H3BBXX_L3_wHAXPI062220-17_1_(paired)_contig_128872:518-533|-	9|TCunknown-1_(paired)_contig_2545:344-361|+	0.47	0.4	1	TAATGAATTTAGCGATACTATTTATTCTGTTGGATCAATCTACGACTTATATGCTACAATGTTTTTTCCAAAGTTGAAAGAACAAAAACAAAAAATATGA	GGTCCAAGAATGCCCTACCAAACTCAGTTATAAATGACTAAAATTCACTCTCATTCCCCATTTTCATTTTCATAATCAGTAATGCTACAATCAACATGGC
CPSSR_289	AG	424	8|FCHL5JJBBXX_L2_wHAXPI059581-29_1_(paired)_contig_10837:588-803|+	N/A	N/A	9|FCHL5H3BBXX_L3_wHAXPI062220-17_1_(paired)_contig_19962:269-286|+	12|TCunknown-1_(paired)_contig_16423:1767-1790|+	1.7	0.4	0.99	GGTATTTATTAATGGATGGTGTCTAGGGCTTTTCTTCTTTCAACTTCACTTCACTTTTGGAGCAAAAGTTAACCGTCGTGGAGCTTGGACCAAAGTCACC	ATGAGAGTGAGAGATGAGAGGGGAATAGTGGGAGTGAGTGGATACAAAAACAGATATCTATTTTGTGACAGTTCACGTGGGAGCAGGTGAGAGCTTGATA
CPSSR_290	AG	425	8|FCHL5JJBBXX_L2_wHAXPI059581-29_1_(paired)_contig_114267:164-379|+	N/A	9|LP161083-1_R1_(paired)_trimmed_(paired)_contig_176436:111-128|-	8|FCHL5H3BBXX_L3_wHAXPI062220-17_1_(paired)_contig_280154:311-326|-	N/A	0.47	0.4	0.97	TCACCAATCACCATTCATCCACCCACAATCATTTAATTTTTATTTGAGCTCCACTGCATCAGTGAAGGGTTTCTCTGTTTTGATATGCTGAGTAAAGAAA	ATAGATCACTACATCTTTTAATTTCTGGAAACTACAGTTGTGATCTTGTGTATCAACCAATAGCCATTCGTCAAATTCTTAGCCGAAAGCTCCAATTTTT
CPSSR_291	AG	426	8|FCHL5JJBBXX_L2_wHAXPI059581-29_1_(paired)_contig_117885:189-404|+	4|LP150221_R1_(paired)_trimmed_(paired)_contig_42307:698-705|-	4|LP161083-1_R1_(paired)_trimmed_(paired)_contig_155123:123-130|+	N/A	N/A	1.89	0.4	0.97	CACACGTGACATGAGGTCAACAATTTCTCTTTTTAACACTCTTAAGCCCTAATTTATGATACTCAAGCCCTAATTTCCCCAATTTTATTGCAATTATCGA	ATAAATCTGCAATCCCAATTCCCAGTAGAGACGACGAAGAAGGGAACGAAGACCTTAGCTCTAAAATCATGGAGAAAGCATTGTCTCGAGCCTCAAATCA
CPSSR_292	AG	428	8|FCHL5JJBBXX_L2_wHAXPI059581-29_1_(paired)_contig_12006:25-240|+	N/A	10|LP161083-1_R1_(paired)_trimmed_(paired)_contig_96356:434-453|-	9|FCHL5H3BBXX_L3_wHAXPI062220-17_1_(paired)_contig_53276:366-383|-	N/A	0.82	0.4	0.99	GCATAAAGAAGCGGAACTGGTGACTACTGTAATCGAAAATAAAAACCCTAACTTTCACAAGTAAATTAAGAATATAAGTAAAACAAGGTTTATCCATGGA	TGTACCTAGAGAGTGTTCCTCGGCAGAGACAACAAAAGACAAAATCGAAAACGAGAAGAGGAGAATCCGCAATATGCGACGAGGCGATCTTGCGTTTCCC
CPSSR_293	AG	430	8|FCHL5JJBBXX_L2_wHAXPI059581-29_1_(paired)_contig_139906:795-1010|+	4|LP150221_R1_(paired)_trimmed_(paired)_contig_234834:130-137|-	4|LP161083-1_R1_(paired)_trimmed_(paired)_contig_79232:864-871|+	N/A	N/A	1.89	0.4	0.97	TTTCCAATTCCAATCCAAACTCACCACTCTCCTACATATAAAAACAAACAACAACACAATCCAAGGATAAAAAGTCAAATAAAAATCAAATGCAAGAAAC	GGAATACCTGAGAGTAGGAATAGTGAGCGGCCGGGTAGGGGCGAATGTACATGCGATGGACATCAGTAGGAGGAAGCAAAAGGAAATGCTTCTCGCCGGA
CPSSR_294	AG	431	8|FCHL5JJBBXX_L2_wHAXPI059581-29_1_(paired)_contig_148903:230-445|+	6|LP150221_R1_(paired)_trimmed_(paired)_contig_220436:184-195|+	N/A	6|FCHL5H3BBXX_L3_wHAXPI062220-17_1_(paired)_contig_158854:644-655|+	N/A	0.94	0.4	0.98	ACCATCTAGTGCTTGGGCCAGATAGTGGGGGGTTTGGGTAGTAATTTAGAGGTTAGAAGCTCAAGTCAATGATACTGTATGATGTTCTGAACATTGACCC	GGATAGACCAAAATATCATTTTGGATTAATCCAATCAAGACAGTGAAGCTCAAAACATCATCAATTGCGGAGGAGGCAGATTGTCTCACAAATCACAAGT
CPSSR_295	AG	432	8|FCHL5JJBBXX_L2_wHAXPI059581-29_1_(paired)_contig_155244:320-535|+	6|LP150221_R1_(paired)_trimmed_(paired)_contig_139385:108-119|-	7|LP161083-1_R1_(paired)_trimmed_(paired)_contig_58533:140-153|-	6|FCHL5H3BBXX_L3_wHAXPI062220-17_1_(paired)_contig_211540:110-121|-	N/A	0.83	0.2	0.99	TTGCTGGCCCTACTGATGAAATCTTAAGGCCATACAATATGTTTTCTTCCTTGGGAGAGACCATGGTTGAGTCACCTTTGATTGCTATTGCTAGAGAGAT	TGGGAAAGGATGTAGCTAGACACTTCAACAAGTTGATGGGGGTTAAATAGCAAACACCTACATGTGGGCTATACAGTGGAGTAATTATTTAGGTCACACA
CPSSR_296	AG	433	8|FCHL5JJBBXX_L2_wHAXPI059581-29_1_(paired)_contig_173606:451-666|+	13|LP150221_R1_(paired)_trimmed_(paired)_contig_24597:2941-2966|+	11|LP161083-1_R1_(paired)_trimmed_(paired)_contig_244650:1248-1269|-	N/A	N/A	2.05	0.4	0.99	ATTCTGGCTCTGGTTCGTGATGATGTGGCTGTGATGATCAGCTTAAGCAGGTTATATGAAGTAGAAACTCTTACTAAATGCGTGCGGGGGCGTGTGTGAC	TGAGATTAACCCTTGTACTGCTGTCTAAGGATTCTAAGTTTTACAAAGCCCTCTTGGGTCAAGGTGGTGCGAAAGTTTCTAGTTAAGGCTATTTGGGGAG
CPSSR_297	AG	435	8|FCHL5JJBBXX_L2_wHAXPI059581-29_1_(paired)_contig_185615:357-572|+	7|LP150221_R1_(paired)_trimmed_(paired)_contig_73534:979-992|-	6|LP161083-1_R1_(paired)_trimmed_(paired)_contig_142674:2071-2082|-	N/A	N/A	0.82	0.4	1	GAAATAGCTCACTGATTTTTCTGGACAGAAACTAGTTTAGAGTTTAACAAATAGAAGAATAAGAACAAGAAGCTATATAGAGAGAAAGTGTGCAGGGAAA	CGGGAACACTTTTAAAAATATGCAAATGTTATTTTTTTAAAGAAAAAATTATGCTATACACGTGTAGAAACCATATTGAACATCAATGTGTGTACTCAAA
CPSSR_298	AG	437	8|FCHL5JJBBXX_L2_wHAXPI059581-29_1_(paired)_contig_201416:6-221|+	7|LP150221_R1_(paired)_trimmed_(paired)_contig_222319:195-208|+	7|LP161083-1_R1_(paired)_trimmed_(paired)_contig_178401:440-453|+	N/A	N/A	0.47	0.4	0.99	TCAATTAGTTCAAGAAATGCACACATTCAAATTCGCGAACAAGCTCAATTGAAAACTGGAAACAGTTTTCAAGATGCAACACACACAGAAATGGAAAGAT	CAACAGATCAGAAGTCTTGATGAGTCCCTCAAGTCTAGGATCGTTCTGTTGTTGATACGGTGGAACTCGATCGAGAAGGTGCTTGAAGTTGTCATTGTAC
CPSSR_299	AG	438	8|FCHL5JJBBXX_L2_wHAXPI059581-29_1_(paired)_contig_202785:982-1197|+	11|LP150221_R1_(paired)_trimmed_(paired)_contig_131033:943-964|+	N/A	8|FCHL5H3BBXX_L3_wHAXPI062220-17_1_(paired)_contig_246018:407-422|+	9|TCunknown-1_(paired)_contig_118742:305-322|-	1.22	0.2	1	GGGAAGTGAGGAGTTGGAGAATTTAGGAGAGAGAGTGAGTGGGATGAGTGAGAGAGAGCTTGGACTAGCCATTGTTAAAGCAAAGCATGAGAAGCTGTTC	GTGAATTTCAGGCTACAGAAGTACAGGTGGGATTCTTGTGATGTGAGAGTGGGATACTGATGTGCTGGGCAAGAGTGAAGGCGTAAAAGCATGAATTCCT
CPSSR_300	AG	439	8|FCHL5JJBBXX_L2_wHAXPI059581-29_1_(paired)_contig_20482:491-706|+	4|LP150221_R1_(paired)_trimmed_(paired)_contig_91771:199-206|+	N/A	4|FCHL5H3BBXX_L3_wHAXPI062220-17_1_(paired)_contig_4196:917-924|+	N/A	1.89	0.4	0.99	AGACCCTCTCAAATAAGAAAAGAGATGGTAGTATAATAAGAGTGCAATGCCATCAACTCTCTTCATTGAAACAAAGTAGAGTGACAAGGGCACAAGAGAA	ACAATAGTGATAACTGTGATAATTAACATGGAGAGAGTTACTAAAGTGTTGGTGATCCTTACCATCTTTCTGATAGTCTTGCCTTCGGACGGTGGTGTCG
CPSSR_301	AG	440	8|FCHL5JJBBXX_L2_wHAXPI059581-29_1_(paired)_contig_211947:233-448|+	9|LP150221_R1_(paired)_trimmed_(paired)_contig_46096:1414-1431|-	N/A	9|FCHL5H3BBXX_L3_wHAXPI062220-17_1_(paired)_contig_251586:529-546|+	9|TCunknown-1_(paired)_contig_149875:102-119|+	0.43	0.2	0.97	TTAAACGATACATTATAGCATATAGAATGAGATTGGAGATGCTCTTACTAGACCAATTCTCTCAACCCTTCCTATTGGACACACACACAAACACACACAT	GAGGGAACATACAATCCAACATTTGTCATGATGTTTGTTGACAAGTGAATCTTGGGACTAGGGAGGTTACATGTGGAGGTCATTAAGGAAGCGACATTTG
CPSSR_302	AG	441	8|FCHL5JJBBXX_L2_wHAXPI059581-29_1_(paired)_contig_220627:202-417|+	8|LP150221_R1_(paired)_trimmed_(paired)_contig_147322:515-530|-	7|LP161083-1_R1_(paired)_trimmed_(paired)_contig_108396:195-208|-	N/A	N/A	0.47	0.4	1	ACCATTCCTAATGATAAAAATGGTGAAAATAATACACCGAGATGATGAATTTATGACAAGTTCTCTCTCTATTTTTGTCATTTACCGTTTAGTGCAAGCA	AAATCTTATCCAAATTAATCCATTTTTGTCAATGCATTGGATTTGATTGGTGGAACATACACGAAATACCCTTTACCAATCCAAAAATTTATTATTGAAA
CPSSR_303	AG	442	8|FCHL5JJBBXX_L2_wHAXPI059581-29_1_(paired)_contig_249174:374-589|+	8|LP150221_R1_(paired)_trimmed_(paired)_contig_178737:129-144|-	9|LP161083-1_R1_(paired)_trimmed_(paired)_contig_210193:605-622|+	N/A	N/A	0.47	0.4	0.99	GCAGTATAAGATCCCCATGTCTATGGTCCCCTCCTACTCCGATCCACCTTTCTTCCTCCTTTCCTATCTGCATCTACAAACACCTCCGCAATCAACGCAA	TTCTCAAACTGTTAAACTTTGCGGCTACGGCGCTTCGTATATGGAGGGGACCAGCCCCATATATAATCATCAACATTACATGCGCCGTTTACTTTCACTT
CPSSR_304	AG	443	8|FCHL5JJBBXX_L2_wHAXPI059581-29_1_(paired)_contig_251441:118-333|+	7|LP150221_R1_(paired)_trimmed_(paired)_contig_220117:185-198|+	N/A	10|FCHL5H3BBXX_L3_wHAXPI062220-17_1_(paired)_contig_250986:257-276|-	N/A	1.25	0.4	0.99	CTGTTACTCCAACAGCTATAGCTCAAAAGTTTGCTCTATAAATCACTTCAGTCCTCACCACCACATTCCTCACAAACCCCCACTCACATATACACATTCT	GGAAAGCAACAATGGAGGGCAAAGAAGAAGATGTGAGACTTGGAGCTAACAAGTACTCAGAGAGGCAACCAATAGGGACATCAGCACAGACAGACAAGGA
CPSSR_305	AG	444	8|FCHL5JJBBXX_L2_wHAXPI059581-29_1_(paired)_contig_261936:111-326|+	4|LP150221_R1_(paired)_trimmed_(paired)_contig_209716:746-753|+	N/A	4|FCHL5H3BBXX_L3_wHAXPI062220-17_1_(paired)_contig_209292:358-365|-	N/A	1.89	0.4	0.99	GTGTCTTTTAAGCTGAGAAAAACAACATTCAAAGTTCACATTTCTATTCCTACATGGTCTCATCAATTGAACAGAGACAATCAAAATGCACAAAAAAACA	ACATACGGAGTTCTGAGAGTCCCAAGCGAGCCAAACAGTAGAAAAATGACCCCAACCGAGCTTGCTCTGAACAACATAACATCCATTCTTGAAGGTGTCG
CPSSR_306	AG	445	8|FCHL5JJBBXX_L2_wHAXPI059581-29_1_(paired)_contig_264703:14-229|+	7|LP150221_R1_(paired)_trimmed_(paired)_contig_84083:772-785|-	7|LP161083-1_R1_(paired)_trimmed_(paired)_contig_49693:1768-1781|-	10|FCHL5H3BBXX_L3_wHAXPI062220-17_1_(paired)_contig_221057:355-374|-	N/A	1.22	0.2	0.99	GATACATGTCGAGTAAGACCATAGCATCATAGCATGTCATATTTTCTATGAAACTTTCATCTGCCTCGCCTTTGGCATGTCTGACAAGGTATGTCGTTAC	ACGAACATACCAGAGGTTTAGAAGACAAAGAGAACAAAATTATTTTAGTCCCCTCCACCACTCCACTTTTGAAGCAGCTCGTAGAGGGAATCAAACATAC
CPSSR_307	AG	449	8|FCHL5JJBBXX_L2_wHAXPI059581-29_1_(paired)_contig_284846:125-340|+	N/A	6|LP161083-1_R1_(paired)_trimmed_(paired)_contig_52629:519-530|-	8|FCHL5H3BBXX_L3_wHAXPI062220-17_1_(paired)_contig_27453:847-862|+	10|TCunknown-1_(paired)_contig_56504:91-110|-	1.41	0.2	0.98	ATTCTAACAATTTAAGAAAAATGTTGTATAACTCATACCCAATGTCCCACAAGTTCTTATATTTCTACAAAGACAACATTATGCATATCTTCTTTATCCC	AACAAGGAATCACTGATAGGTTTGTAATAATTATATCTTAATTTTTACAAAATGGAACTTTAGAAAATTGACCGATTTGGTTCATTACTGTTAATATTGG
CPSSR_308	AG	452	8|FCHL5JJBBXX_L2_wHAXPI059581-29_1_(paired)_contig_48316:1201-1416|+	N/A	11|LP161083-1_R1_(paired)_trimmed_(paired)_contig_131212:131-152|-	9|FCHL5H3BBXX_L3_wHAXPI062220-17_1_(paired)_contig_223220:881-898|-	N/A	1.25	0.4	0.99	AGCCCGGGATCTATAATAAGAGGCATTGCCCTTTGACCCCTGCAATTCATAGCCAGATATGGTGACATTTGACCAAACGAAACACTGTTAGCACATACTC	AACTCACTCTTTCCAACCTAACCGACTTGAGTGCTCGATAAAATTCATATTACGATTCAACTTAGAAAACGTGTGGAGAAGATCTGCACATCCCAAGCTA
CPSSR_309	AG	453	8|FCHL5JJBBXX_L2_wHAXPI059581-29_1_(paired)_contig_49599:191-406|+	9|LP150221_R1_(paired)_trimmed_(paired)_contig_122323:457-474|-	N/A	9|FCHL5H3BBXX_L3_wHAXPI062220-17_1_(paired)_contig_288636:330-347|-	N/A	0.47	0.4	0.99	GGAAAACTCCTACAAATCGGATATGTGGAGAAGAAAAATACTGGTATTCACCAGAGAAATCAAAAGAAAAGAAGATAATTAGAGGGAACCTCCCTCTTCT	ACCCCTCTTTCAGATCTGAAAGTACTAGAATCTTTTCTTGTGAGGGCTTTCTTCACTTTATTAAAGTAAGCGAACGTCTTATGGTGGTTATACAGAATGT
CPSSR_310	AG	454	8|FCHL5JJBBXX_L2_wHAXPI059581-29_1_(paired)_contig_52409:1051-1266|+	N/A	N/A	7|FCHL5H3BBXX_L3_wHAXPI062220-17_1_(paired)_contig_87185:479-492|-	11|TCunknown-1_(paired)_contig_59495:1971-1992|+	1.7	0.4	0.98	TTTTTTGCTGAAGATGATATGAACTTTGATATAATAGCAGAGCAAATAACTTGCAAATCCATGCTTCCATTTCCATGGCTGCTATAGATTTGAGCATGGT	ACCAAAGCGCACGCAGCCAAGGCTCAAGCCTTGTGTGTATGCCTACTCACCAAATCTTCTAATCCATACTATGTGCAGCCTTGAATAAATCATTTAAAAG
CPSSR_311	AG	455	8|FCHL5JJBBXX_L2_wHAXPI059581-29_1_(paired)_contig_58175:206-421|+	11|LP150221_R1_(paired)_trimmed_(paired)_contig_25780:3362-3383|-	N/A	N/A	11|TCunknown-1_(paired)_contig_31392:615-636|-	1.41	0.4	1	CAACCCAGCCCCAATACCTACATATCAACATCAATGACATAAACTTCCATATTATTTGTTGAGATGTAACTCCACAACACCTCTAACAAAGAAAAAAATT	AATATCCAGACACACCAATGTCATAAAATCCAGCTTTAATAGCTGCAGCAACATCAGCAACTGCCTGAAGCCCAGACGAACATTGCCTATTCACCGTTCT
CPSSR_312	AG	456	8|FCHL5JJBBXX_L2_wHAXPI059581-29_1_(paired)_contig_58701:240-455|+	6|LP150221_R1_(paired)_trimmed_(paired)_contig_106042:98-109|-	6|LP161083-1_R1_(paired)_trimmed_(paired)_contig_28649:224-235|-	N/A	N/A	0.94	0.4	0.97	ACGGTGATGGCGACGACGGTCCGACGAGGCAGTGGTGGCTGCTGCAGCTGGGTCGTTGCTCGTGGGTTGTTTGGGTTGTTTGGTGTGTGTGAGTGTGTAA	ACAGTAAAGAGTGAGAGAGAAGGTGAGGGGTTAGTATATATATAGTGTGTGTGAGGTATGATGTGAATAGTGTAGTTATGGTGTGAATAGTGTAGGGCAA
CPSSR_313	AG	457	8|FCHL5JJBBXX_L2_wHAXPI059581-29_1_(paired)_contig_65191:1432-1647|+	7|LP150221_R1_(paired)_trimmed_(paired)_contig_137007:570-583|-	7|LP161083-1_R1_(paired)_trimmed_(paired)_contig_138499:277-290|+	N/A	N/A	0.47	0.4	0.99	TTGATAGCTTTAAGGTTGTCTAGATTGAGCTCCGGTGAAGGTGTTGTTGTTTCCATTTTTTATTTTCTAGAGAGAGAAAGAGAGAAATATGGAGTTTTTA	ACAGATGGTTTTCAGTGTTGGTTTTTGGCTTATATACATATTTTTGCTGCATATTTTATTTTTTACGTTTTTTGTGTCCGAGGTGTTCTGTTTTTATTTT
CPSSR_314	AG	458	8|FCHL5JJBBXX_L2_wHAXPI059581-29_1_(paired)_contig_78097:457-672|+	N/A	6|LP161083-1_R1_(paired)_trimmed_(paired)_contig_16642:725-736|+	8|FCHL5H3BBXX_L3_wHAXPI062220-17_1_(paired)_contig_94123:416-431|+	8|TCunknown-1_(paired)_contig_9993:1591-1606|+	0.87	0.2	0.96	GCCGTTGTCGCCGCCGCCACTGCTGCTCTCATCGCCATTTGTTGGGAACGCACCTTCTACAGGAATGAAACTACTCCGAAATGATCTGAGGGAATTTTCT	AAGAGAAGGGGGAGGAGAGAGAGTAGGGTTTATGATCCTGGGACTCCTGAGTTTCAGTCCGACAATGTTTAAGGGCTTATGCTGCAAATACTGAAATGCC
CPSSR_315	AG	459	8|FCHL5JJBBXX_L2_wHAXPI059581-29_1_(paired)_contig_8089:118-333|+	12|LP150221_R1_(paired)_trimmed_(paired)_contig_54558:2063-2086|+	10|LP161083-1_R1_(paired)_trimmed_(paired)_contig_235911:179-198|+	N/A	N/A	1.63	0.4	0.97	CCATCTTCGTTTTACTCCACGTTCTCAATTAATTGCACGTAGAAAAGCACATGGAAAAAAAACCTCACAAGAATGTATTTATGCGCGTGCGTGTGTGTAT	AAAGAATTCTAATAGTCTTATGCAACATACCTGAGCATCAGCTCCTGATGATACAAGCACCTTTAGATCATTTGAGAAGGCAAGGCCAGTAACTCTCTTC
CPSSR_316	AG	460	8|FCHL5JJBBXX_L2_wHAXPI059581-29_1_(paired)_contig_93850:305-520|+	7|LP150221_R1_(paired)_trimmed_(paired)_contig_175204:287-300|+	6|LP161083-1_R1_(paired)_trimmed_(paired)_contig_112436:133-144|-	N/A	N/A	0.82	0.4	0.99	GGAATTCCCCTTGACAGGAACTGTGTAGCTGTCATGATCAAATTCAACAACAAAAATTGGAAATTTTCAACAGAAAATTAAAGTAAGTAACAAAATTTGA	TTCAAGGAATGAAACTAACCCATTAAGTACTTGAAAGTGCGAGAAAAATTCGTAGGGTCTACATCTCCTACTACCACTTGAGAATCTACCGAAGCCTTCG
CPSSR_317	AG	462	9|FCHL5JJBBXX_L2_wHAXPI059581-29_1_(paired)_contig_135666:162-379|+	6|LP150221_R1_(paired)_trimmed_(paired)_contig_49665:2375-2386|+	6|LP161083-1_R1_(paired)_trimmed_(paired)_contig_21332:380-391|+	6|FCHL5H3BBXX_L3_wHAXPI062220-17_1_(paired)_contig_66468:888-899|+	N/A	1.3	0.2	0.98	TGCAACAACAATACTAATGCTTTGCATAATTAGTATAGATGGGTCCAATTGGGATGTTAGATTACAAGAAACTAGATAGGAATACACACACTGTACTGTA	AATGCCCTAAAGTGCCCTAAATGTCTGAATCTGTGTTTGAACAGCTGATGATAATTGCAATGTTTGAAATGCAGAAGAATGGCAAAACAAAAAAACCCAT
CPSSR_318	AG	464	9|FCHL5JJBBXX_L2_wHAXPI059581-29_1_(paired)_contig_201202:575-792|+	7|LP150221_R1_(paired)_trimmed_(paired)_contig_103905:308-321|-	N/A	N/A	8|TCunknown-1_(paired)_contig_37102:807-822|+	0.82	0.4	0.98	AGAGGCGAGCTCCGGTGCGGTGTCGGGGTGTTGCCGCGAAGAGAAATTGAGAGTAGAGATGAAGGGGTTTGGGGATTTTGATCGGAAGGAAGTGAAGAGT	ATTCTGGTGGTTGAAGGCGGTCCGACGACGGCGGTGGCCGGCAAAAATGGCGCAGGCAACGGGCAAGGGGTGGAGGTGCCGTGGGTTTTTTTCCTGCGGG
CPSSR_319	AG	465	9|FCHL5JJBBXX_L2_wHAXPI059581-29_1_(paired)_contig_203145:227-444|+	N/A	8|LP161083-1_R1_(paired)_trimmed_(paired)_contig_51643:2873-2888|-	N/A	7|TCunknown-1_(paired)_contig_34952:778-791|+	0.82	0.4	0.99	TGAAATTGGCAGCTTGTGCTAGAAAATACAGTTGAAGTTGAGTAATCACAATTAAGGTTGTCAGCAATGCTACTTTTTGAGTATCAGAACAAAACAAATC	AAACCAAACTAATTTCTAGAGGGAGAAGAAAAGGACATTTTTTTTTCCCTTTTTATTAAGAGAGAGGTTGCAAGACCACAAGCTGCTTCAACTTATTCAG
CPSSR_320	AG	467	9|FCHL5JJBBXX_L2_wHAXPI059581-29_1_(paired)_contig_219664:19-236|+	7|LP150221_R1_(paired)_trimmed_(paired)_contig_24009:3150-3163|-	7|LP161083-1_R1_(paired)_trimmed_(paired)_contig_62474:535-548|+	4|FCHL5H3BBXX_L3_wHAXPI062220-17_1_(paired)_contig_39138:658-665|-	N/A	1.79	0.2	0.99	TTTAATCACAAGTAGGCAACAATTCTAATTACTTATTTTCTCAGAAACTAAACAAGCTACAATTTTATTGTAAATTCATATACTTCAAGTGAGTAAAGAA	CTAAAGAAGAATTCAAACCTTCCAGCATCTTCAGGACTGAATTCAACATCATTACAACCCAAACTCCTCGCATATTTCACCATACTCCTGGCAATCTCAA
CPSSR_321	AG	469	9|FCHL5JJBBXX_L2_wHAXPI059581-29_1_(paired)_contig_276673:218-435|+	11|LP150221_R1_(paired)_trimmed_(paired)_contig_29656:2894-2915|+	9|LP161083-1_R1_(paired)_trimmed_(paired)_contig_95230:576-593|+	N/A	N/A	0.94	0.4	0.98	TATACGAAAGTAACCAGATACTAGTACTACTAGATTTTTGACCCCATTAAATGATACAGTAAACATCAAAGGAAAGTCTAGAGAGAGAAACCAAAATTGT	TAAAGACTAAAAAAGAGTAAAGAGAGAGCGAACCTTCTCACTAATGGCATCTTGGACAAGGAGAGTGTCTGTAGAGACACTAAAGACAATATCACCAGTT
CPSSR_322	AG	470	9|FCHL5JJBBXX_L2_wHAXPI059581-29_1_(paired)_contig_292197:25-242|+	7|LP150221_R1_(paired)_trimmed_(paired)_contig_83450:847-860|-	11|LP161083-1_R1_(paired)_trimmed_(paired)_contig_126212:1082-1103|+	N/A	N/A	1.63	0.4	0.98	CACGATGCATAAAATCAAGATCCGACTAGTTGAAAAGGTATTCATGAAAAAACACAATTTTCATCTAACCCTAACAAAATCTCAATGATAGATAGAGCTA	AACAAACTGAGCTCGGAGATGAAGAGCAAGAGCATGATAAAGGAGGAAGCGATGGTGATAACGCCGCCGGAGAGAGTACGGCTGTAGAAATCCTCATTGA
CPSSR_323	AG	471	9|FCHL5JJBBXX_L2_wHAXPI059581-29_1_(paired)_contig_2989:1343-1560|+	5|LP150221_R1_(paired)_trimmed_(paired)_contig_194375:181-190|+	8|LP161083-1_R1_(paired)_trimmed_(paired)_contig_51063:1103-1118|+	10|FCHL5H3BBXX_L3_wHAXPI062220-17_1_(paired)_contig_55142:1492-1511|-	N/A	1.87	0.2	0.97	AGATGCAAAAAAACAAGAATAAATTATATAGTGAAAGGTTTTTGTAAAACTCATTCGTATCACTATCATGGCAACAATATTAGAGAGATAGACTGACTGA	TTCAGTTGCTAACCTGTAAATCTCCTTGAAGCAATAGAATTTATGTTTTTTATGAGTTGGCAAGTTTCAAAGTTCCCCCTTGTGCTCGAAAAAATCTGTT
CPSSR_324	AG	473	9|FCHL5JJBBXX_L2_wHAXPI059581-29_1_(paired)_contig_44660:45-262|+	8|LP150221_R1_(paired)_trimmed_(paired)_contig_3785:2868-2883|+	5|LP161083-1_R1_(paired)_trimmed_(paired)_contig_195496:226-235|+	N/A	N/A	1.7	0.4	0.97	GTTTTAAAACAGCCTTGTAAGATGAAATGGAGAATTATGAATCTGAGAGGTAGAATACTACTTACTAAGTAGCAAAAATGGAGTAGTCAAAAACTATAAC	ATTTATAAGAACCATAATACATATCATGTTAATAACCTGCACAAAATAAATAATGAGTTAGGTATAGAGAGACTAGGGAGAGCCTCATACTATAGATAGC
CPSSR_325	AG	474	9|FCHL5JJBBXX_L2_wHAXPI059581-29_1_(paired)_contig_53093:3-220|+	5|LP150221_R1_(paired)_trimmed_(paired)_contig_149624:1522-1531|+	5|LP161083-1_R1_(paired)_trimmed_(paired)_contig_1613:1200-1209|-	5|FCHL5H3BBXX_L3_wHAXPI062220-17_1_(paired)_contig_180255:269-278|-	5|TCunknown-1_(paired)_contig_14317:905-914|+	1.6	0	0.99	AACAGAAATCAAGTAACAAAGTTTGGCAAGAAAAGACTGTCTCTCCTTATGAATCTGCATATATGATTGATTTGTTGAAGTATCTATCCAGTAAAGGTGC	ATCAAAACCTGCAAAAGGACTTGGGAATTCAAAAAAGTGTCACCATTGCACTCTTTGGAGTCATCTTGAGAAAATATTCTATTCAAACTCATTACACTTG
CPSSR_326	AG	475	9|FCHL5JJBBXX_L2_wHAXPI059581-29_1_(paired)_contig_57996:168-385|+	N/A	N/A	8|FCHL5H3BBXX_L3_wHAXPI062220-17_1_(paired)_contig_289010:805-820|-	8|TCunknown-1_(paired)_contig_94085:771-786|-	0.47	0.4	0.99	GTTAGTAAGAAATGGTAGACCATCTTGTCATGTAATTGAAGCCATTGCAATCGGAGATATCACGTTGTTAATAGTACATGATCTTGTGATTGTGACTGCT	ATATGAACCAGCTTCACTACGCTGAGATGGAGGACCAAACAAATTGCACTTCCAAGTTTTTTCTTGCATGTAGAGCAACTGTCATTGCTTGTGCGCACAC
CPSSR_327	AG	477	9|FCHL5JJBBXX_L2_wHAXPI059581-29_1_(paired)_contig_87573:66-283|+	5|LP150221_R1_(paired)_trimmed_(paired)_contig_11490:1331-1340|-	5|LP161083-1_R1_(paired)_trimmed_(paired)_contig_166571:1086-1095|-	N/A	N/A	1.89	0.4	1	CTTTCTATGGTTGGTTCAGTTTCAATGATAAGTTTCACTTTCTTCAAATTTAACCTTTTTCCATCCATGGTAAAAGGAATCAATACCCTGTCACCAGATT	TTGGGTCATGGGTGAGGGGGTCCTTGTAGGTATTGAGAGCATGTGAGTGGGGTTACATGAGACTACTAGATACAAAATGAAAAGGTTTGGAATTACCATC
CPSSR_328	AGA	478	10|FCHL5JJBBXX_L2_wHAXPI059581-29_1_(paired)_contig_74138:668-897|+	12|LP150221_R1_(paired)_trimmed_(paired)_contig_28455:2815-2850|-	9|LP161083-1_R1_(paired)_trimmed_(paired)_contig_182295:822-848|-	N/A	N/A	1.25	0.4	1	AAACCACTCCTTCCCCATTTGGAACCAAAAAATCTTCGATTTTAGCACTATTTGACATATTTGCATCATGGGTCTTATCTGAAGTAATATTAGCAGTAGC	TGGGGTTGAAAATGAGAAAGGCCATGGTTTCAGAGAAGAATTGGAAGTAATATTACTAAACCCTTGAAACATTGGGGTGATTATAGGAGTCTTTAAAGAA
CPSSR_329	AGA	479	5|FCHL5JJBBXX_L2_wHAXPI059581-29_1_(paired)_contig_110950:965-1179|+	6|LP150221_R1_(paired)_trimmed_(paired)_contig_87281:3195-3212|-	6|LP161083-1_R1_(paired)_trimmed_(paired)_contig_103631:115-132|+	N/A	4|TCunknown-1_(paired)_contig_11728:362-373|+	0.83	0.2	1	AAAGAGTACGGTACTTACCAGAAAGAGAGAACTTTGAAACATTTTCTTGTAATATCTGGGCTCTATTAAGTAGGAACTGCAGTCCTGATAGGGCCTTCAC	AAACTAAGTAGCAGAAAATGCACTAACAAGACACAGGTAGACATATGAAGCAGAAAGCATTAACATGAAGCACTATAAGCAGTGTTTCAAGTCGCACACA
CPSSR_330	AGA	480	5|FCHL5JJBBXX_L2_wHAXPI059581-29_1_(paired)_contig_11620:341-555|+	6|LP150221_R1_(paired)_trimmed_(paired)_contig_80497:155-172|+	N/A	5|FCHL5H3BBXX_L3_wHAXPI062220-17_1_(paired)_contig_27028:209-223|-	N/A	0.47	0.4	0.91	TTCGAGATATAGACAATTACGCCGTCGGAGCAGAAACTGCCCGAGAGGAGCCTTCTACTTCCCAGACTTTCGCCACTTTCCAAGAGTTTCCTGAAGAAGG	AATGGCTGGTTCTTTGAAAAGCCGACTAGAGAGAAGGAAAGAATTGAGGGTGGCAGCTCCAGGAGCATCCTCAGGGGGCTCTGAGCAACCCAAGATGCAA
CPSSR_331	AGA	481	5|FCHL5JJBBXX_L2_wHAXPI059581-29_1_(paired)_contig_117642:407-621|+	4|LP150221_R1_(paired)_trimmed_(paired)_contig_137656:282-293|+	N/A	N/A	4|TCunknown-1_(paired)_contig_40517:198-209|-	0.47	0.4	0.99	TTATGTTCTGGCAATATATCAGCTATTTGGACATTAAATTAGTGAAAGAGGTACCTTGGGGTTGGCTACATGAATCTTTTTTCGCCTTACTTGGAATAAT	AAAAAGGGGGAACTTATAAAAGGGAAGATGTACTCTACACCAAGAGCTTCTCTTTTGGTAAGGAATTAAAATCTTCCCCCGAGGACATTGATAGTAGAAT
CPSSR_332	AGA	482	5|FCHL5JJBBXX_L2_wHAXPI059581-29_1_(paired)_contig_18610:285-499|+	5|LP150221_R1_(paired)_trimmed_(paired)_contig_107944:611-625|-	4|LP161083-1_R1_(paired)_trimmed_(paired)_contig_116269:822-833|+	N/A	N/A	0.47	0.4	0.99	CGACAACATCGTATACATCACCCATGCACGCCACCTGTTTGTTTCCGGTATAATAAATGGGACCACCACCACCAACTCCAACTCCTCCGTCAAAACCACC	AGGAGAGGAGAGAAGAGGGTGGTGATGATGATAATAAGGAAGCTGAATCTGATCATGAGTCGTCGTCATCATCATCTTCTTTGTACAAGGAAAAGATTCA
CPSSR_333	AGA	485	5|FCHL5JJBBXX_L2_wHAXPI059581-29_1_(paired)_contig_205240:5-219|+	4|LP150221_R1_(paired)_trimmed_(paired)_contig_204575:299-310|-	4|LP161083-1_R1_(paired)_trimmed_(paired)_contig_23808:679-690|-	N/A	N/A	0.47	0.4	0.98	AGAAGGCTCTTGTTATCAAAGAGACTCGAGTTTGCAGTATAAATGGTGCAACATTTCGATGGCCATCATCCAAGCAATACTAAAGTAACAATACATAAAG	ATCGAAGACACTGAAACAATGACATAAAGGACAAATCGCAAATATGAAAAATTGGCTATCCAAGCTAAACTGCCAAAATAATATAGAGATTTGTCAACAT
CPSSR_334	AGA	486	5|FCHL5JJBBXX_L2_wHAXPI059581-29_1_(paired)_contig_243540:179-393|+	4|LP150221_R1_(paired)_trimmed_(paired)_contig_104960:2219-2230|+	4|LP161083-1_R1_(paired)_trimmed_(paired)_contig_233414:969-980|+	5|FCHL5H3BBXX_L3_wHAXPI062220-17_1_(paired)_contig_18036:1203-1217|+	N/A	0.5	0.2	0.98	TGAATTCATCTCGTATTGTATCAATCCAGTGTTCCACAAATGGGGTTTTCTATTGCTTAAGCGTGGATGGAAAATTAGGAGTATTCGACCCAAATAGAGC	TTATGGCTGGGCTAGCTGTTCTTATCTCGCCCAAAACATTGCCTTGCAATTCGACCCATAGTAAATATTTATTAGAAAGCAATGGAGATTTGGTATCAGT
CPSSR_335	AGA	487	5|FCHL5JJBBXX_L2_wHAXPI059581-29_1_(paired)_contig_244576:245-459|+	4|LP150221_R1_(paired)_trimmed_(paired)_contig_222945:124-135|-	4|LP161083-1_R1_(paired)_trimmed_(paired)_contig_108568:227-238|-	6|FCHL5H3BBXX_L3_wHAXPI062220-17_1_(paired)_contig_146109:255-272|+	N/A	0.83	0.2	0.99	ATTAACAAAAAGGTACCTGTTTTTCCATGTCAGGGAAAATAGCAATAAGATGATCGACCAGCGACGATCGCAATAATTGAGTAGCAACAGCAGATGAAGG	AGGAGAAGGAGAGGTTGTTGATGTAGGTCGAGGAGGAGAGAATCGAATCGGAGAAGAAGAACAACGAATTCTCTTGGAAACTGAGGGAGGAGTAGTAGGC
CPSSR_336	AGA	490	5|FCHL5JJBBXX_L2_wHAXPI059581-29_1_(paired)_contig_31777:1767-1981|+	2|LP150221_R1_(paired)_trimmed_(paired)_contig_93090:1237-1242|+	2|LP161083-1_R1_(paired)_trimmed_(paired)_contig_144255:909-914|+	N/A	3|TCunknown-1_(paired)_contig_23872:3497-3505|+	1.22	0.2	0.96	AAATGAGGTTGACTACGTTGTTGGGGTTTTGGGTTTGAGGAAGAAAATGGTAAAGTGGGTTTGAGATTGACTTGGGTTGTGAGCTTGTTAAGGTTTGTAG	TGATGATGAAGAGAATGTTGAATTTGATATAGTAGTTATGTTGAAGAATGGTTTTGAATGTGGTTTTCTCAGAATTATATGGTTAATGGAATAGATTAAA
CPSSR_337	AGA	494	5|FCHL5JJBBXX_L2_wHAXPI059581-29_1_(paired)_contig_70243:221-435|+	3|LP150221_R1_(paired)_trimmed_(paired)_contig_56435:638-646|+	N/A	3|FCHL5H3BBXX_L3_wHAXPI062220-17_1_(paired)_contig_178459:107-115|+	3|TCunknown-1_(paired)_contig_101226:544-552|+	0.87	0.2	0.97	CCCGCATTTGCCACCACCCTACACCGCCCCAACTCGCCGGCAGCCACCTTCCCCAAATTTCCAGCAAAGAGGCAGAAAACAGGGGAAGAAGAAGGGGAAG	AAAAGGGAAGAAGAAGGAAGAGGACGGAGGAAGAGGAAAGGGAGGAAGGAGAGGGTTTTGGTGCACCTTTGTCCCACATTTCGATCGCTGATTTCACGCT
CPSSR_338	AGA	495	5|FCHL5JJBBXX_L2_wHAXPI059581-29_1_(paired)_contig_96701:669-883|+	5|LP150221_R1_(paired)_trimmed_(paired)_contig_190802:365-379|+	4|LP161083-1_R1_(paired)_trimmed_(paired)_contig_3659:489-500|-	5|FCHL5H3BBXX_L3_wHAXPI062220-17_1_(paired)_contig_126295:476-490|+	N/A	0.43	0.2	0.98	TTCCCGAACCCAACACGTCGGTCTTCGAGCTCCGACTCGCCATGCCAGTCTTCAGAATCTTCCCCGACGGACATATGTTGCCGGTGGGAAGCACATTCTG	AGGCGGCGAATTCACCGACCCTCCCCCGTACGTCAACGGCTGATACGAACCGCTCGAATCGGTCCGAGAATGACCCGGCTTGAAATTACGGGTCCCTCCG
CPSSR_339	AGA	497	6|FCHL5JJBBXX_L2_wHAXPI059581-29_1_(paired)_contig_115889:115-332|+	N/A	6|LP161083-1_R1_(paired)_trimmed_(paired)_contig_26058:344-361|-	N/A	4|TCunknown-1_(paired)_contig_79327:713-724|+	0.94	0.4	0.99	TGACCAAGCGATGGGTTCCCAGCAATAAGTTTCCGTGCATATTCAGTCATTTCAGATGCTTCAATAGCATAGACATGTTTTGCTCCAGCCTGATCAAGAG	AAAAAAATTGAGGATTGTCCTAGAAACTTTAATATATTGCATCAGACTTGAGCAGAAAAATGCATCAACCATGAGCAGAAAATATGGATGTAAACTTAGA
CPSSR_340	AGA	498	6|FCHL5JJBBXX_L2_wHAXPI059581-29_1_(paired)_contig_128761:117-334|+	4|LP150221_R1_(paired)_trimmed_(paired)_contig_222244:217-228|+	4|LP161083-1_R1_(paired)_trimmed_(paired)_contig_141859:1021-1032|+	4|FCHL5H3BBXX_L3_wHAXPI062220-17_1_(paired)_contig_159618:128-139|+	4|TCunknown-1_(paired)_contig_27416:828-839|-	0.8	0	1	TTGTGCTACTCCTACCCATCCTTAGTAGAGAAAAAGACCTTGCTAACATTGAAGAAACTCGATCCAATTGATTTACAGACCTTGCACCTTTAAAAATGCT	GCATGAAGAGGATGGAAAATTTCTTTGGCTTTCTCTTTGTAATTTCACAAGAACAAAAGACTGATCCATGGACAATGATCTCTTCAACCCCATTATTAAA
CPSSR_341	AGA	499	6|FCHL5JJBBXX_L2_wHAXPI059581-29_1_(paired)_contig_219744:121-338|+	N/A	N/A	6|FCHL5H3BBXX_L3_wHAXPI062220-17_1_(paired)_contig_207453:540-557|+	3|TCunknown-1_(paired)_contig_95451:468-476|+	1.41	0.4	0.98	GAGGAGAGAAATCAGTAAAACTTGAACTGGATCACCGTAATTCGAAGGGCGGCGCCGTCTTCTGAAGTGTTGGTTTGGTCATGGGAAGCAGAAAACAGAC	CGACGACGACGACTAAAATATGTCTGAACTCTGAAAAAAACGGGGAAGAATCTGCTGCAAGCGGATTTTTCTCGAATTGGGAAATAATTGGCTGCGGTCG
CPSSR_342	AGA	501	6|FCHL5JJBBXX_L2_wHAXPI059581-29_1_(paired)_contig_41368:72-289|+	5|LP150221_R1_(paired)_trimmed_(paired)_contig_33051:2307-2321|-	N/A	8|FCHL5H3BBXX_L3_wHAXPI062220-17_1_(paired)_contig_73410:118-141|-	8|TCunknown-1_(paired)_contig_65544:386-409|-	1.3	0.2	0.98	TGTTCATGTCATCTTGCAAGAGGATGAGAATCATGAAAGGATCAGAAGCTAGAGGACTAGGTTGTGGTGTATGACAAGCCCACAAGCAATAAAAAACCAG	GATGATATTTCTGTCATGAAGAGCAAAATCTGCTTTCAGGCTTCAGCAGAGATGATATTTCTCCAAGAAGAAAAAAATGGATTTTGAATACTTCTGGGAA
CPSSR_343	AGA	503	7|FCHL5JJBBXX_L2_wHAXPI059581-29_1_(paired)_contig_164464:401-621|+	8|LP150221_R1_(paired)_trimmed_(paired)_contig_93349:712-735|+	8|LP161083-1_R1_(paired)_trimmed_(paired)_contig_78071:924-947|-	N/A	N/A	0.47	0.4	1	TGGGCGATTTGAACTGTTGAAGGAAGAAATCCATCAAATTTAAGGGAGATTTGAGTATTCCCAAATTTTGGATCTGAGAGAACAAAATAAAAAAAATAGT	ATCAGCCGCACTTGGATATGCGGTTTTCTACTGCGCCAGAGCTTGTATTTGCGGTTTGACCAAGTCGGAGGTAGGATTACCTATCGTCAATGGCACTGGA
CPSSR_344	AGA	505	7|FCHL5JJBBXX_L2_wHAXPI059581-29_1_(paired)_contig_5866:5-225|+	N/A	5|LP161083-1_R1_(paired)_trimmed_(paired)_contig_125437:121-135|-	5|FCHL5H3BBXX_L3_wHAXPI062220-17_1_(paired)_contig_92254:179-193|+	N/A	0.94	0.4	0.99	ATTGGACTATATACATTAAAACAATTTCTATCACTTAGTCCTCACAATCATTCTTAAATTTTAAAAGGCTCTCCTTAACAAAAACTAAAAGGGGAGCCTG	ATAAGTAGAGAAAGCATGGCTAAGATTCAAAGCTCAAAATATGTGGTGTTTTTATTATTAGTGTCTTCCATGGTGCTTAATGGGTATTTGTTGTTGTATA
CPSSR_345	AGA	506	8|FCHL5JJBBXX_L2_wHAXPI059581-29_1_(paired)_contig_212162:196-419|+	7|LP150221_R1_(paired)_trimmed_(paired)_contig_97389:214-234|+	7|LP161083-1_R1_(paired)_trimmed_(paired)_contig_211190:667-687|+	7|FCHL5H3BBXX_L3_wHAXPI062220-17_1_(paired)_contig_308172:415-435|-	N/A	0.43	0.2	0.97	GAGTTAATGGTGATGGGATAATACTTGTTGTGTAAATGCGGTGGTGGAGGACTGGTGGTGGTGGCTAAAGAAGTGTTTGGTCAGTTGAGTGTAAAGAAAG	TGGGAAGAGCACCTTGTTGTGATAGGCATGGAGTGAAGAGAGGGGCATGGACACCTGAAGAAGATCAGATTCTTGTTGATTACATGATGAAAAATGGTGG
CPSSR_346	AGC	509	5|FCHL5JJBBXX_L2_wHAXPI059581-29_1_(paired)_contig_173626:161-375|+	5|LP150221_R1_(paired)_trimmed_(paired)_contig_65070:181-195|+	4|LP161083-1_R1_(paired)_trimmed_(paired)_contig_223155:297-308|+	N/A	N/A	0.47	0.4	0.98	TTCAACTTACTTGACCATTAGCAGCAATTGAAGATGCAACATTAGTAGTTGCAGCAGCAACAGTGGAACTAGCAGCAACAGAAATAGCAGCAGCAACAAT	GGCTGCCTTTTGCTTCTTAGACCTCATAGATCTTACTGGAGCTCTCTGACATGTTGTCTTGTTGTGTCCAAATGCATTGCAAGTGCTACACTTGACAGTG
CPSSR_347	AGC	510	5|FCHL5JJBBXX_L2_wHAXPI059581-29_1_(paired)_contig_200713:37-251|+	N/A	N/A	4|FCHL5H3BBXX_L3_wHAXPI062220-17_1_(paired)_contig_57622:867-878|-	5|TCunknown-1_(paired)_contig_9189:1145-1159|-	0.47	0.4	0.99	AAACTTGGCCAGCAATTTCTGGTCCAAACAACCTGGGCAAGCTTGAACCCAGATCAATTTCTATAGTCTTCTTCTTAATCACATCATCCCTCTCCTTCAA	ACTCATTGTATCTCCCACCTGATCTCTCTTCTCTCCGCTAGCGAACCGGTCCAGCCAGATTCCCAAAACATGCTTCGCAATCGGACTCACATGATCCTGC
CPSSR_348	AGC	511	5|FCHL5JJBBXX_L2_wHAXPI059581-29_1_(paired)_contig_237621:153-367|+	4|LP150221_R1_(paired)_trimmed_(paired)_contig_8660:3504-3515|+	4|LP161083-1_R1_(paired)_trimmed_(paired)_contig_77653:320-331|-	4|FCHL5H3BBXX_L3_wHAXPI062220-17_1_(paired)_contig_23946:580-591|-	N/A	0.43	0.2	0.99	AAGTCGAAACAAATGCAATCGTCAATTCATATTTTTTCAACTAAAAGAAATCAAACTCTAGATAATTGTCCAAACTTTTCTGATCAGAAGCTGGAGCAGG	CGCCTTTTCACTTGTTGATGCTGGCGGAGCCGGTAGTTTCTCAATCTCTACCGGCTTGGGGATGTCGGGCGGGGTAGCACATCGTATCAATGCCCAGTTC
CPSSR_349	AGC	512	5|FCHL5JJBBXX_L2_wHAXPI059581-29_1_(paired)_contig_261409:203-417|+	4|LP150221_R1_(paired)_trimmed_(paired)_contig_45788:1199-1210|+	N/A	5|FCHL5H3BBXX_L3_wHAXPI062220-17_1_(paired)_contig_188629:181-195|-	5|TCunknown-1_(paired)_contig_40695:1169-1183|+	0.43	0.2	1	GATTCGCGACCATTTCTACAATAACCACAACCGCAAGCGCGCCGAGCCTCACCGTGTCCTCGAAGAAGCCCGGACGACCGAGTCCGAGGATTCGTCTCAG	AGTAACAGTTACGCCGATTTCGACATTTCGAAGCTTGCGGTCGATGAGGAGAGTGACGATGAAGAGCGGGATTCGAATAAGCCGTACAGTCTCGGTCCGA
CPSSR_350	AGC	513	5|FCHL5JJBBXX_L2_wHAXPI059581-29_1_(paired)_contig_26934:401-615|+	4|LP150221_R1_(paired)_trimmed_(paired)_contig_5700:1362-1373|-	4|LP161083-1_R1_(paired)_trimmed_(paired)_contig_170010:313-324|+	N/A	N/A	0.47	0.4	0.99	CATCGGGAATACCAGAAGTCGTCGGAACTATAAACTGGGCCCACACTGCCTGACCGGATATAAGCCCACGCGCCGGCGGAGGGAGTGGTATTACAGAAGA	CAAATTCTCAACGCCGCCATAGACAACAGAATTATTACACGCCGCCGCCGCGAACATGAAGGAGTTGTTGTTGTTGTGGTTGTGGTTGTAATAGTGATTC
CPSSR_351	AGC	516	6|FCHL5JJBBXX_L2_wHAXPI059581-29_1_(paired)_contig_73564:21-238|+	4|LP150221_R1_(paired)_trimmed_(paired)_contig_115011:690-701|-	6|LP161083-1_R1_(paired)_trimmed_(paired)_contig_155674:120-137|-	N/A	5|TCunknown-1_(paired)_contig_48459:183-197|-	0.83	0.2	0.98	TTCAACCTTTCCTCGACATCATTCATTATCTCATTCGTCTAGATCACTTTCTGTTCTCGATCTCATTTCAAAAACGTACTACTGGTTGTTCAGCTTTGCT	AGAGGCAAAGCCAAGAATATAGTTCAGGATTGGCACACTTCAAATATGGTTAGTCAAGAAAATGATTGGCCCATATGGGGTTTAGGGAAAGATTTGGGTC
CPSSR_352	AGC	517	7|FCHL5JJBBXX_L2_wHAXPI059581-29_1_(paired)_contig_83373:341-561|+	6|LP150221_R1_(paired)_trimmed_(paired)_contig_113900:680-697|-	5|LP161083-1_R1_(paired)_trimmed_(paired)_contig_134859:245-259|+	N/A	6|TCunknown-1_(paired)_contig_46255:523-540|+	0.71	0.2	0.99	TCCGAGAAGGACGTTGAAAATATGGCCACCGTGATGGTGGTGGTGATAGCAATGTTGATCCTGATGATGTTGAGCAGTACTTTGCATGTGAAGCAAACCT	ATTATTGTTGGTCACAACAATGGACTCTCGTGCGTACGCCACGTGTCCTGATGATGATCTCGCTCCGTGTGATTTAATCAGTACTGCTGGTGCAGCAGCA
CPSSR_353	AGG	518	10|FCHL5JJBBXX_L2_wHAXPI059581-29_1_(paired)_contig_222309:144-373|+	9|LP150221_R1_(paired)_trimmed_(paired)_contig_90297:1086-1112|-	9|LP161083-1_R1_(paired)_trimmed_(paired)_contig_101016:431-457|+	11|FCHL5H3BBXX_L3_wHAXPI062220-17_1_(paired)_contig_103203:678-710|+	N/A	0.83	0.2	0.99	CAATGGAGCCTGAAGCTATGAGGCAACAATTCCCATTTTACAATGAGATGCAGGCGATATTCACGGGGAGGATGCAAAGAATGCTATGGGCTGAAGCTGA	TACAAGCGGGTCTAAAAAGAAAGCGTCGCAGCTATCATCGGACGACGATGATGACAACGAAGAGAGTGATGGTGAAAAAGGTGGTAGTAAAAAGAAATTA
CPSSR_354	AGG	520	5|FCHL5JJBBXX_L2_wHAXPI059581-29_1_(paired)_contig_308070:3-217|+	N/A	6|LP161083-1_R1_(paired)_trimmed_(paired)_contig_71100:571-588|+	7|FCHL5H3BBXX_L3_wHAXPI062220-17_1_(paired)_contig_176609:463-483|+	7|TCunknown-1_(paired)_contig_42557:523-543|+	0.83	0.2	0.99	GAGCTTGGTCAATTCACCTTCATCTGGTCAAGGGTTTTGTTTCAATGTATGTAACAGTAGTAGCAATGAAAGTGCTGGTACTACTACTATTAGTTCTAGA	AGCAATTCTCTGCTTTCTCCATGTGGACTGCCTGAATTGCAAGGATTGTTTAGCCCTTTATCTGATGAAATGGGAGGTTGTTCCTTACCATCTTCTCCTC
CPSSR_355	AGG	522	5|FCHL5JJBBXX_L2_wHAXPI059581-29_1_(paired)_contig_59567:647-861|+	3|LP150221_R1_(paired)_trimmed_(paired)_contig_207439:199-207|-	3|LP161083-1_R1_(paired)_trimmed_(paired)_contig_208178:237-245|-	N/A	4|TCunknown-1_(paired)_contig_60121:1088-1099|-	0.83	0.2	0.99	AAATCATCAACAAGGACTGTCATTCCTCTTCTCCGTTCTTCGAATCGTCCGTCGACGTTCCGCCGCCGTCGAGGCCGACTCTTCAGAACGCAGAGTCACA	AGTTGTTCTATCTCCACCATCACCAGCAAAGAAGCACAAGCGAACTGGTCTGATCCTAGGGTTTGTCATCGTAATCGCATTCCTAATCACATCGATTCTG
CPSSR_356	AGG	523	5|FCHL5JJBBXX_L2_wHAXPI059581-29_1_(paired)_contig_88891:65-279|+	4|LP150221_R1_(paired)_trimmed_(paired)_contig_11841:436-447|-	4|LP161083-1_R1_(paired)_trimmed_(paired)_contig_11241:826-837|+	4|FCHL5H3BBXX_L3_wHAXPI062220-17_1_(paired)_contig_195643:496-507|+	N/A	0.43	0.2	0.98	GAGTAGTGGTGGAGAGAGAGATGACGGAGTCGTGTCTGGTGAAGTTAGGGTTACAGAGGCGTATTCCGAAGAGCCTTGATTCAAATGAGGAGATGGAAGA	AGACGGCGTCGTTATGGTATGGTAGACGACGGATTTGAAGGGGAAGTTGCTGGTGACAGCCATGGTGTGTTTTTTTCTCTCACTACACTACACTACCTAA
CPSSR_357	AGG	524	6|FCHL5JJBBXX_L2_wHAXPI059581-29_1_(paired)_contig_255125:117-334|+	7|LP150221_R1_(paired)_trimmed_(paired)_contig_191144:530-550|+	N/A	7|FCHL5H3BBXX_L3_wHAXPI062220-17_1_(paired)_contig_55084:211-231|-	N/A	0.47	0.4	0.99	TCACTTTGGAGTTCGAGCAGTTTGTCATAGAAAGTATGAATAATAACAACAGTAGCAACACGTCACCGGCAAATTCGGCAATATCAATAACAGCAATAGC	AACAGGAAGTGGAGGAAGTAGCAATTCCGCCGCTTTGCCAATCGACGATCTTCACTTCCCACCTGCTCCTTTCTCCTTTCAAGACCGCAAAGACGAAGCC
CPSSR_358	AGG	525	6|FCHL5JJBBXX_L2_wHAXPI059581-29_1_(paired)_contig_41473:16-233|+	2|LP150221_R1_(paired)_trimmed_(paired)_contig_208857:218-223|+	4|LP161083-1_R1_(paired)_trimmed_(paired)_contig_18525:244-255|+	N/A	N/A	1.63	0.4	0.96	GCGGCAAGCAAAGACAAGCCATCATCAAGGCGAGCTTCAAAACACACAAAAGGGTCCATTAATAACGGACAAGAGATCGTGAAGCTGCACTATCCGACAA	AGAGAGAAAGGAAGAAGGAAGTGAATGAGGAGAGAGAGGACATCAAGAGATTGTCTTCTGGTGCGATTGTGAAAATCAAGGAACTGAAGGTGTCTGATGA
CPSSR_359	AGT	527	5|FCHL5JJBBXX_L2_wHAXPI059581-29_1_(paired)_contig_167383:282-496|+	3|LP150221_R1_(paired)_trimmed_(paired)_contig_134330:549-557|-	3|LP161083-1_R1_(paired)_trimmed_(paired)_contig_168541:1315-1323|-	N/A	6|TCunknown-1_(paired)_contig_27514:533-550|+	1.3	0.2	0.97	ACATCCTCACAACCTCACAACCCCACCATCTCTGCTTATTCAGTAGTACTATATTATTACTCATGAGTGTTGTTCCATCACTCACTCCATGAGACAACAA	AGAAGAAGAAGATGAAGTGACCCTTTGTTGCAAATTCCTCAAAGCCAAACGTGCTAAAGCCATTGACAAGATTTGATCAAATTCTAGAGTGAGAAACCTA
CPSSR_360	AGT	528	5|FCHL5JJBBXX_L2_wHAXPI059581-29_1_(paired)_contig_203637:10-224|+	4|LP150221_R1_(paired)_trimmed_(paired)_contig_56827:1412-1423|-	N/A	5|FCHL5H3BBXX_L3_wHAXPI062220-17_1_(paired)_contig_174050:139-153|-	5|TCunknown-1_(paired)_contig_95919:164-178|+	0.43	0.2	0.98	ATTATGTAAATATAGCACGAAATTTCGCCAGATATAATGATGGTATGAGCTCAAGGAGACATAAATAGCATGTAGAATTTAAAAACAGAAGCCAAAAAAA	AAGAATTAAGAATTTAGCAACATTACCAGCCATTTTATCACCCAAACCGAGCGAAACTGCGAGCTTCGGCATCTGCTTCCTCCATGCAGACCCCACAACC
CPSSR_361	AGT	530	6|FCHL5JJBBXX_L2_wHAXPI059581-29_1_(paired)_contig_102967:616-833|+	4|LP150221_R1_(paired)_trimmed_(paired)_contig_81348:1579-1590|-	4|LP161083-1_R1_(paired)_trimmed_(paired)_contig_37349:665-676|-	N/A	N/A	0.94	0.4	1	TTTTCCTTTTTTTCATCTCTATTCAAGGACATCTGATTGTGATGGAAGCAAGAAAAGTTAATAGACCCTAATAATTGAGAAAAAAAAGAAGCACTGAAGA	ACAAGATTACAGATTAATGTTGGTAAAACTTGTTAAAGATATATAATTAGGAAAAACAGTTAGAAGTCTAGTGAATTCATTCATGGCTTCTCTCTATTTT
CPSSR_362	AGT	531	6|FCHL5JJBBXX_L2_wHAXPI059581-29_1_(paired)_contig_134944:525-742|+	N/A	N/A	5|FCHL5H3BBXX_L3_wHAXPI062220-17_1_(paired)_contig_255086:274-288|+	5|TCunknown-1_(paired)_contig_35517:1130-1144|-	0.47	0.4	0.99	AATCTGATCTAGTATTACCAGTGATAGTGATATTGTAGAAATCAGGATCAGATGGTATCGAGGTTTTGCAACAGGCGATCCCATGGCAACCTCCTCCTGC	ACTAGTAGTAATACTATAAGTAGTACTACACACCGCCGTACAACCTGCCATGATTTTTCCATCAAAAGTGAGGAGAGCATTGTCACAACCCACCACTGTA
CPSSR_363	AGT	533	6|FCHL5JJBBXX_L2_wHAXPI059581-29_1_(paired)_contig_36486:140-357|+	6|LP150221_R1_(paired)_trimmed_(paired)_contig_62601:276-293|+	4|LP161083-1_R1_(paired)_trimmed_(paired)_contig_72585:256-267|-	4|FCHL5H3BBXX_L3_wHAXPI062220-17_1_(paired)_contig_211845:246-257|+	9|TCunknown-1_(paired)_contig_68056:694-720|+	1.83	0	0.97	TCCTCTGACGGATTCATCTGGATCATTGAACATCACCCAAGATGGTAACATGGTGATTTCTGACAACAAAGGGATCTCTATCACTTTAAAGACCAATATG	GGCAAGGTGAGTGTAACTCTACTTAATTCTGGGAATTTAGTTCTCCAAGCAGGAACTCAAACAGTGTGGCAGAGTTTTGATTACTTATTTGATACGTGGG
CPSSR_364	AGT	534	6|FCHL5JJBBXX_L2_wHAXPI059581-29_1_(paired)_contig_99805:192-409|+	5|LP150221_R1_(paired)_trimmed_(paired)_contig_51202:111-125|+	6|LP161083-1_R1_(paired)_trimmed_(paired)_contig_16712:1222-1239|-	N/A	N/A	0.47	0.4	0.98	GACTTGGTGAAAAAGATTGATGCTTTGTGGAATAATTTTACGATATTTAGAAACTATCGTGAAAACCAATATGATATAGTCAATGTACTACGATGAATGC	AGGAGTAGTATCATTCGCACTCGCATATACAAAAACAATAATTATAGTAACAAGAATTATGGGGGCGTGTCGTGGTCGTATTATGTAAAGATCTTGTAAT
CPSSR_365	AGT	535	7|FCHL5JJBBXX_L2_wHAXPI059581-29_1_(paired)_contig_109338:828-1048|+	5|LP150221_R1_(paired)_trimmed_(paired)_contig_187736:479-493|+	3|LP161083-1_R1_(paired)_trimmed_(paired)_contig_89062:333-341|+	N/A	N/A	1.63	0.4	0.97	GGAAAAGTTCAGAGCTTGTAAATTAATAACTCATTTTTATGTTCATCGAATAGGCCACCATTTTTTACCTTTTCTTTTTATATTTTCATTGTGCTAATTA	TTTTATTAAAGGGATTGAGTGCACTTTGAAAAGTTGGGCAAGTCTTGGATCTTCCTTAGGCATAATCTTTCCTAATCTTCCTACTTACTACTTTTATTTA
CPSSR_366	AT	538	10|FCHL5JJBBXX_L2_wHAXPI059581-29_1_(paired)_contig_47086:644-863|+	6|LP150221_R1_(paired)_trimmed_(paired)_contig_103180:1222-1233|-	6|LP161083-1_R1_(paired)_trimmed_(paired)_contig_172444:638-649|+	N/A	N/A	1.89	0.4	1	AGCAGTTGGGCCGCAAATCAGACATGTGAGTCTTTGCATAATGTTCTCATAAATAGGATTAATTTCAGATCTTTGAGATGTACTGCAGTTTTGTTTTTGC	GTATTCGTGTGTACATTGGTATGAGAAGTACTGGGATAGATTTGGTTCTCCTGTATCTCCTTGTCGTGAGGCTAACTTCAAATGATCGAGTGATTTTGGG
CPSSR_367	AT	539	6|FCHL5JJBBXX_L2_wHAXPI059581-29_1_(paired)_contig_111338:40-251|+	5|LP150221_R1_(paired)_trimmed_(paired)_contig_34926:2261-2270|+	N/A	6|FCHL5H3BBXX_L3_wHAXPI062220-17_1_(paired)_contig_162180:1315-1326|-	N/A	0.47	0.4	0.98	AAAGGGAAACTGGGTTATAGTATAACTAATATGGGATAAAGGGGTGAGTGCAGAAGGTTTTTGTTGTGCAAATATCGCCTCTCTCTCCCACTATATACAC	GATGAACAAATGAAAAGTATGTGCCGTAGATAGGAAATGTTTCTTAGGCAATCTCCTCTACTTCTCCTGGAGTTACTTGTTGGAGTGTTTTATTTATCTT
CPSSR_368	AT	540	6|FCHL5JJBBXX_L2_wHAXPI059581-29_1_(paired)_contig_111605:245-456|+	8|LP150221_R1_(paired)_trimmed_(paired)_contig_61979:1069-1084|-	N/A	5|FCHL5H3BBXX_L3_wHAXPI062220-17_1_(paired)_contig_149020:275-284|-	N/A	1.25	0.4	0.98	TCTACAGTGTGTGGCATGAAGTTACCATACAATTACCACTAGAATCTTACCGCGTCAACTTATATTTATTCAATGGACCATCACGCATGGGCCCTACAGA	GACGTGGAAGTGATTAATTTAAAGTAGTGAATAGTTGGTATGAAGTGACCCATAATAACTGTAGAGGAATTTATGCTCGTTTTGGCTCCAGTGATATGTG
CPSSR_369	AT	541	6|FCHL5JJBBXX_L2_wHAXPI059581-29_1_(paired)_contig_119392:258-469|+	10|LP150221_R1_(paired)_trimmed_(paired)_contig_34981:946-965|-	6|LP161083-1_R1_(paired)_trimmed_(paired)_contig_195043:533-544|+	8|FCHL5H3BBXX_L3_wHAXPI062220-17_1_(paired)_contig_47562:941-956|+	N/A	1.66	0.2	0.99	CTTGGACACATCTTTTTTTGTTTTTCAGGTTTTGTAGTCTACTCACTTGACAAAATATGTTCAAGGTACTTCTTTCTTTCCTCCCGTATCGATTACATGC	GTGCAGCTATACTAAGAAACTGAGGGACAGCGAGCCAGAAATGTACAATTTATCAGTTATAATCTCAATGCGCCAGGATGCCATCAGGACAGGAGAAATT
CPSSR_370	AT	543	6|FCHL5JJBBXX_L2_wHAXPI059581-29_1_(paired)_contig_124728:108-319|+	11|LP150221_R1_(paired)_trimmed_(paired)_contig_97535:3608-3629|-	N/A	10|FCHL5H3BBXX_L3_wHAXPI062220-17_1_(paired)_contig_120475:869-888|+	N/A	2.16	0.4	0.96	TGGACATGCCAATGTCAACGGCCTTTTATAAACTTGTGATTGGTCAGGTAAGCTGAACGCGTCAATTAATTAACTTTTTTACATACTTTTAATCACACAC	AATATATATGAATGTGTTTGCATTAATCAAAACACTTTGCCTTCTAATCTATGCAGGAGCTTGATTTGCATGATATTCTTTCATTTGATGCTGAGTTTGG
CPSSR_371	AT	544	6|FCHL5JJBBXX_L2_wHAXPI059581-29_1_(paired)_contig_126521:11-222|+	6|LP150221_R1_(paired)_trimmed_(paired)_contig_69381:185-196|-	7|LP161083-1_R1_(paired)_trimmed_(paired)_contig_137898:347-360|-	7|FCHL5H3BBXX_L3_wHAXPI062220-17_1_(paired)_contig_26355:217-230|+	N/A	0.5	0.2	0.99	TAAAATTTATGTCTATTTTTTTTTATCCGGTTATTAATGTAAGCTCATGATGCACCTTGGTGACCGTTGTCGTGTTGGTTATGACATACGGACGTACACA	AGGTTGATGATTTTTATGCATACATGTTGTATGTTTATATCTAGTAGCAATTAATGTGTATTTAGGTATACTAGATATTACACACGTGCAACACAGTGGA
CPSSR_372	AT	545	6|FCHL5JJBBXX_L2_wHAXPI059581-29_1_(paired)_contig_128841:498-709|+	9|LP150221_R1_(paired)_trimmed_(paired)_contig_4538:5796-5813|+	9|LP161083-1_R1_(paired)_trimmed_(paired)_contig_116283:1344-1361|+	N/A	N/A	1.41	0.4	0.99	AACTTCATGAACCTGCCAAGTGCCAACACAACACCACCCAATATAACTTTCTTTAATTTCTTAGACAAGCATGCATTTGTCTTCTACTAAAAAAATTGAC	GATGAATAAGAGAAAGCAGGAAAAAGAGTATTGGATTAACCAATATGATGATATTGAATTATTGATCATAGTGTCAGTGTGAGTGTAGAAATTAAATAGA
CPSSR_373	AT	546	6|FCHL5JJBBXX_L2_wHAXPI059581-29_1_(paired)_contig_129665:149-360|+	5|LP150221_R1_(paired)_trimmed_(paired)_contig_74309:1258-1267|-	5|LP161083-1_R1_(paired)_trimmed_(paired)_contig_155566:207-216|+	N/A	N/A	0.47	0.4	0.98	CCAAAATATACTTTATCTTTACGCTACAGAGGGATCGCACAAAGAAAATGCCAAGAGTTAAGCATGGAATGGCAAAAATGATAATGATACTAAGAGGGGG	TTCACTAACAAAAGGTAAATTAGATATAATGATCAAAAAAGCAAAACCAAAATCTCACCTTATATTCCTTAGTGGAATCATACCCAAGAGCAATGTCTTC
CPSSR_374	AT	550	6|FCHL5JJBBXX_L2_wHAXPI059581-29_1_(paired)_contig_151720:353-564|+	4|LP150221_R1_(paired)_trimmed_(paired)_contig_110657:1838-1845|+	4|LP161083-1_R1_(paired)_trimmed_(paired)_contig_48830:838-845|+	8|FCHL5H3BBXX_L3_wHAXPI062220-17_1_(paired)_contig_296512:115-130|-	N/A	1.66	0.2	0.99	CCAGGCTTAGTAGCTACCAATCTCCTCATTTTTGTCTTCAAGCCATGCCATTTTATTCTTTGGTGCTTCTCAGTATTTGTTTTGTATCAATGAATTTCTG	GATGATGGGCTTATATTATTTTACAAAACTTTTGTCTAATCTTGTTTGGCTGAACTTCTTAGGAGATGGTGATTTAATTCTTTAAAAATAGAACCTGATT
CPSSR_375	AT	553	6|FCHL5JJBBXX_L2_wHAXPI059581-29_1_(paired)_contig_15512:441-652|+	5|LP150221_R1_(paired)_trimmed_(paired)_contig_17889:763-772|+	5|LP161083-1_R1_(paired)_trimmed_(paired)_contig_1874:232-241|-	5|FCHL5H3BBXX_L3_wHAXPI062220-17_1_(paired)_contig_108098:205-214|+	N/A	0.43	0.2	0.99	ACGCCTGTAGCACGTACCATAATTTTTTAGTAAATGGTTACTAGGTTAAACTTAAGAAAGTGGTGTAGGAGAATAGTTGTTTTACTATAACTGCCTGCTC	AGCAAGTAAAAAGGATGTTCGGGGTCTACTAACTAATTTAATCATTGAAAGACCAGATTTAGTACTATCCTAAGAATGTCTTTCTATATATAAGAATTGG
CPSSR_376	AT	556	6|FCHL5JJBBXX_L2_wHAXPI059581-29_1_(paired)_contig_160108:107-318|+	N/A	9|LP161083-1_R1_(paired)_trimmed_(paired)_contig_47717:320-337|-	8|FCHL5H3BBXX_L3_wHAXPI062220-17_1_(paired)_contig_139262:344-359|-	N/A	1.25	0.4	0.99	CCAATCAGAACTACTACCAAAATCAAACAATTACTCAATAATTCAGGCTGTTCACAATCTAAAATTGAACTAATAATCACCCTATAAAAGTATGGTAGCA	AGTCTGAGGAAAAAAGGAAATGAGAAGCTGACATTTTCTTACGAACATCGACTTGCTTATCCTTACGCTCGTACTCCTGTCTGATCTTCTTCTTATCTGC
CPSSR_377	AT	557	6|FCHL5JJBBXX_L2_wHAXPI059581-29_1_(paired)_contig_160427:810-1021|+	5|LP150221_R1_(paired)_trimmed_(paired)_contig_139591:241-250|-	5|LP161083-1_R1_(paired)_trimmed_(paired)_contig_114273:183-192|-	N/A	N/A	0.47	0.4	1	ATCTCCAAACTCCATCAGTTGTCTCTGGTGATATGTTGGTACATACTCTCTCGCCGGTGATATGTTCTCAGCTACTACACGAGACATTCGTTGTTTCTAG	CAACCGTTATATAGATACACGAAACTCGGCTTCTTAGAGAGAGAAACTCTGTTTAATTTGACGGTGTGGATGGAACGGAATGTACATGTGTTGCGCTGAT
CPSSR_378	AT	559	6|FCHL5JJBBXX_L2_wHAXPI059581-29_1_(paired)_contig_162810:719-930|+	6|LP150221_R1_(paired)_trimmed_(paired)_contig_105017:931-942|-	7|LP161083-1_R1_(paired)_trimmed_(paired)_contig_23978:565-578|-	N/A	N/A	0.47	0.4	1	TTTAATCTAATGTATCAATGTATGATACTCCACCAATAAAAAGAATATAATCCAGATGTAACGCGCGCGCACATACAGACACGCATACAAACAGGTGTAC	TTCAGACATGGGCATTGAGCTAGGGCCAAATGAAACAGTCATACTATCATTAGTTAAGATCCACAATGATACCTAGTTGATCACCCTTCATATGGGAAAA
CPSSR_379	AT	561	6|FCHL5JJBBXX_L2_wHAXPI059581-29_1_(paired)_contig_167166:261-472|+	N/A	8|LP161083-1_R1_(paired)_trimmed_(paired)_contig_139941:398-413|-	6|FCHL5H3BBXX_L3_wHAXPI062220-17_1_(paired)_contig_123829:122-133|+	N/A	0.94	0.4	0.98	GTGCATATCTAATTAAGATTCCAAAATTTCTCGACATTTTCAACGAAAACTTTAGCTTGCCAATCATGATTCTAGCAATGTTGTAAAATTTGAAATTGAG	TTTTTTATAGAAAACACATTTGTATTACTATTGAAAAATGATACAAGGAGGACAAGAAGTCGTCAGGAACAAGGTTTATTGGTTTGGTTTGGTTAGGTTA
CPSSR_380	AT	562	6|FCHL5JJBBXX_L2_wHAXPI059581-29_1_(paired)_contig_17084:1556-1767|+	5|LP150221_R1_(paired)_trimmed_(paired)_contig_115091:2109-2118|+	5|LP161083-1_R1_(paired)_trimmed_(paired)_contig_56955:106-115|-	4|FCHL5H3BBXX_L3_wHAXPI062220-17_1_(paired)_contig_22618:1124-1131|-	N/A	0.71	0.2	0.99	GACTTGCCCATCCTGACATCCCCAGACACGTGTGCGGACATCGTTTCCATTGTATAGATTTTTTGATAACCCTTCAGGCTCAAAAGATGTTCAAGTATAC	TTTTTTCTGGAAGTATGATAACAAATTTTAATTTTAAAACCTAATTCATGTCCCTATGTTTATAAAGTTTTCTCACCTATGCATCACATGTTTCAAGCAT
CPSSR_381	AT	563	6|FCHL5JJBBXX_L2_wHAXPI059581-29_1_(paired)_contig_172938:119-330|+	5|LP150221_R1_(paired)_trimmed_(paired)_contig_171706:354-363|+	6|LP161083-1_R1_(paired)_trimmed_(paired)_contig_119233:356-367|-	N/A	N/A	0.47	0.4	1	ATGTTGAAGGTCAGATTAGTATATTCACTTTCCTCATAACCTATTTTGAGCAGACAAAATGTAACTGATCAATTGGATGATGGAGTGACCTGTATATATC	GATGGAATGTAGATACACCAATTTATTTCTCTTTTTTATGTTTGGGGTAAAGAATGATTGAGCTTTTTTTTAATTCCTGAAGAAAATATAAGCATATTGG
CPSSR_382	AT	564	6|FCHL5JJBBXX_L2_wHAXPI059581-29_1_(paired)_contig_175234:355-566|+	6|LP150221_R1_(paired)_trimmed_(paired)_contig_161316:902-913|+	6|LP161083-1_R1_(paired)_trimmed_(paired)_contig_76695:191-202|-	7|FCHL5H3BBXX_L3_wHAXPI062220-17_1_(paired)_contig_282997:268-281|+	N/A	0.43	0.2	0.99	CCAACCATCTTCATCTATGGAGACTAGCTTTCGCTTGACGATCAACATTGACGGCGAAGGCTAATTGAAACCAGGCCCGAAGACTAACACTCCCATCTTC	GGAGACTTGCTTTTGTTTGACGGATCATCATTGACGTCGTCAAGGCCCAAAGGCTAATGAAGCAAACCCATATGCTAAACGAACCAAGCCCGTCGCCTAA
CPSSR_383	AT	565	6|FCHL5JJBBXX_L2_wHAXPI059581-29_1_(paired)_contig_17961:496-707|+	5|LP150221_R1_(paired)_trimmed_(paired)_contig_102006:1805-1814|-	5|LP161083-1_R1_(paired)_trimmed_(paired)_contig_172917:255-264|+	3|FCHL5H3BBXX_L3_wHAXPI062220-17_1_(paired)_contig_81419:326-331|-	N/A	1.09	0.2	0.99	TTTGTGCAGAATGATGTGACATGGCACGAGGACAACTGGTACAACCATGACAGCAAATTTCTTGCATTTACGTAAGATATTATACATCTCTGCCAATACA	AAACTTTACAGTGATTCTGCTTGGGTTGATTATGTTAGTTTATGATGGAATGGGATGGGTACCTTACATATCTTGGCATAAGCTTTTTTATTTAAAAAAA
CPSSR_384	AT	566	6|FCHL5JJBBXX_L2_wHAXPI059581-29_1_(paired)_contig_180260:180-391|+	5|LP150221_R1_(paired)_trimmed_(paired)_contig_43486:532-541|-	5|LP161083-1_R1_(paired)_trimmed_(paired)_contig_171692:149-158|+	6|FCHL5H3BBXX_L3_wHAXPI062220-17_1_(paired)_contig_192648:619-630|-	N/A	0.5	0.2	0.99	TCTTATTTTTTTTATCATCAAGCTAAACCTTTTTTTATAAGTAATATAGTACAACTAATCATTATTTCAATGCTAAACGACAAGAACATGAAATTAAAAA	AGAGATAAAAACAAAAGAAGTTAGGACTTGGGAGAAAGAAGGAAGAAGATGGGCCTTTTTTTTATATGGGGACTTATTAATTAAAGAGCGGCATTGTCTT
CPSSR_385	AT	570	6|FCHL5JJBBXX_L2_wHAXPI059581-29_1_(paired)_contig_184743:76-287|+	5|LP150221_R1_(paired)_trimmed_(paired)_contig_162098:534-543|-	N/A	6|FCHL5H3BBXX_L3_wHAXPI062220-17_1_(paired)_contig_290636:373-384|+	N/A	0.47	0.4	0.99	GATTTCTGTAATTGTATCAAAATAATTTTGTAGCATTGTAATGATGAGATTGAATTGAAGATAAAAACAAAATGAAATGAATCGGCATTGAGAGAGAAAA	TTATTGGATTGTTAGGAAGATTATAAAGAGAGAGCGGCGGAATGTCGAACAAGACGGCGCCGCCGGGGTCCCCTCCAACGTCGTCCGGAAATAGCTCGCC
CPSSR_386	AT	573	6|FCHL5JJBBXX_L2_wHAXPI059581-29_1_(paired)_contig_189409:161-372|+	7|LP150221_R1_(paired)_trimmed_(paired)_contig_42229:217-230|-	7|LP161083-1_R1_(paired)_trimmed_(paired)_contig_131653:209-222|-	N/A	N/A	0.47	0.4	0.99	AGTGCATTTCTATATTTTACATGTCGTCCATTTGTGAAATGATATTTAGATAACTAAACACATGATATGACTTAATTGATTTTTTGCAAGAATAATCATC	ACACACCTACGATATAATCAGTTCGATCGCCGTTACACATTAAGAAATGAGTCTAAAATTGTTTGTAGTCCTCCTTTGATTTTTCAATTAATCCTAGTAA
CPSSR_387	AT	574	6|FCHL5JJBBXX_L2_wHAXPI059581-29_1_(paired)_contig_190170:57-268|+	5|LP150221_R1_(paired)_trimmed_(paired)_contig_20175:247-256|+	5|LP161083-1_R1_(paired)_trimmed_(paired)_contig_171022:220-229|-	N/A	N/A	0.47	0.4	0.97	CTTTATAATGATGCTGAAAGAGCTTTTCTGTATCCTTGGACAAGAACATGTCTTGAAAGCTACTTTAGTCCTGGAAATGACAATGTCACTCTTGCAGTAA	CTCCTCAAGTAGGATTCGAACCTACGACAGTCAGTTAATAACTGAACGCTCTACCACAGAGCAATTGAGGAACACACAATAACCCAACATTTGAGGAACA
CPSSR_388	AT	575	6|FCHL5JJBBXX_L2_wHAXPI059581-29_1_(paired)_contig_190519:419-630|+	7|LP150221_R1_(paired)_trimmed_(paired)_contig_170630:687-700|+	7|LP161083-1_R1_(paired)_trimmed_(paired)_contig_77804:843-856|+	7|FCHL5H3BBXX_L3_wHAXPI062220-17_1_(paired)_contig_302011:269-282|-	N/A	0.43	0.2	0.99	GTTACTTGCTTCCCAATCATCTCACATGTATTAAAAGTAAACAATTGCAACTTTGTTCTTCAAGGACAATTCTAAATTTGGTTTCAGTTTCTTCTGCAAA	ACACAACTAATGCAAAATGCAAAGGGCAAGTCCCATGTCCAGATAAAACTACATAAGCAAGCTTGGAACAAATTGTTAACAAAATGGCAAAACAAACATC
CPSSR_389	AT	576	6|FCHL5JJBBXX_L2_wHAXPI059581-29_1_(paired)_contig_19314:5186-5397|+	4|LP150221_R1_(paired)_trimmed_(paired)_contig_19951:1991-1998|+	4|LP161083-1_R1_(paired)_trimmed_(paired)_contig_16124:412-419|-	5|FCHL5H3BBXX_L3_wHAXPI062220-17_1_(paired)_contig_275118:124-133|+	N/A	0.83	0.2	1	ACCTCATGGAATCTCTAACTAATGTCCTAGAATTATGAATCTATAAGTGAAACACGAGCAATGACTAGACCAAAAAAATGGTACTGTACTTAGAAAGGAC	ACTTATTATCAAGATGAACAAATGAGCACTGAATATCAGTTAATCACATCTTGTACATGTGCAGAAGAGCAGCAAAATGGCTCATTAGGATAAGGAAACT
CPSSR_390	AT	577	6|FCHL5JJBBXX_L2_wHAXPI059581-29_1_(paired)_contig_192990:69-280|+	6|LP150221_R1_(paired)_trimmed_(paired)_contig_108237:437-448|+	6|LP161083-1_R1_(paired)_trimmed_(paired)_contig_157504:1598-1609|+	5|FCHL5H3BBXX_L3_wHAXPI062220-17_1_(paired)_contig_77855:861-870|-	N/A	0.43	0.2	0.98	GATCTAGATTGCTTTCCAGCAAGAACTCTTACAGATTTGGGTGCCTAACCCAAATACAAGAAGTATACAGTTCATCCAAGTTTGAAGGTTCCACATATTC	CAAAGCTGTGGTAAGACGATACTGAAAAAGAACACTCACCTGAATGCAAGAACCCAATAACGGTGAGATTTCTTTTTTCAAGTTATCACGAATCAAGCCA
CPSSR_391	AT	578	6|FCHL5JJBBXX_L2_wHAXPI059581-29_1_(paired)_contig_205162:880-1091|+	5|LP150221_R1_(paired)_trimmed_(paired)_contig_116192:1044-1053|+	5|LP161083-1_R1_(paired)_trimmed_(paired)_contig_146299:1009-1018|-	5|FCHL5H3BBXX_L3_wHAXPI062220-17_1_(paired)_contig_331951:196-205|-	N/A	0.43	0.2	0.99	TGAGAGTTAGGAATTTCTAACAACATTAAGAAAACCCATAAGCTTTAGATTCCAATGCTTCATCTATTGAGTTCATAATCAAGTTCCTCAAAAACCATTA	TCTCAAATAAACCGTTCACTACTTCTCTTAAAAATATAATTCCACCCAGGGAGTCTCTCCCGCTCTGCAGAACAAACCGGTATTGCAGCCCAGAAACTAT
CPSSR_392	AT	579	6|FCHL5JJBBXX_L2_wHAXPI059581-29_1_(paired)_contig_207200:349-560|+	5|LP150221_R1_(paired)_trimmed_(paired)_contig_107180:497-506|-	5|LP161083-1_R1_(paired)_trimmed_(paired)_contig_78458:1045-1054|+	N/A	N/A	0.47	0.4	0.99	CCCCAGTACTTCATATATTCTTTCCTACTCCGCCGAAAAATCAGAAGCACCTATTGATAGGTACGCCATTTTCTTTAGCAACTTTTAGGGTTTTACCCAA	TTATATATATAAATCTTCTTTTTGAGATTTAGCCGGAAAAAATAATAATCTAGGGGTTTTCATTATTTTGTGAGGAAATCATTGCTGCTATAAGCTAAAT
CPSSR_393	AT	580	6|FCHL5JJBBXX_L2_wHAXPI059581-29_1_(paired)_contig_21298:406-617|+	5|LP150221_R1_(paired)_trimmed_(paired)_contig_105508:240-249|+	N/A	6|FCHL5H3BBXX_L3_wHAXPI062220-17_1_(paired)_contig_31376:301-312|-	N/A	0.47	0.4	0.99	TTAAGTTGTCATGACATGCGGGTTTCAGTCCAGAGAGGAGCCACTTTGTGTCTAAACCGAAAGTTAGGCTTATATATATAGTGTTGGATTATTGACATTA	GATCACAAACATATCCCGCCTTATCTGTATCCTACATTTTAATAAATTTGTGAATCCCCATATCCATGCACCTGTATCTGTATCCCCGTATTAATATCCG
CPSSR_394	AT	581	6|FCHL5JJBBXX_L2_wHAXPI059581-29_1_(paired)_contig_214264:262-473|+	3|LP150221_R1_(paired)_trimmed_(paired)_contig_162046:336-341|+	3|LP161083-1_R1_(paired)_trimmed_(paired)_contig_116625:920-925|-	N/A	N/A	1.41	0.4	0.98	GTACACATTCATCCATTGTTGCATTATGCATGAACTATGTATTTTCCAATAGGGTGACATATTTTCCCTACTTTTGGCAAATGCTCTAAAAGCTCCAAAC	AGCCAACAATGTAACTTAATAATTACAGAAATAGAAGCTTTGATGATTGAAGGCCCCCATCTAAACCTACCTTATCATTGGAAATAATCACTGATAAAGT
CPSSR_395	AT	582	6|FCHL5JJBBXX_L2_wHAXPI059581-29_1_(paired)_contig_21553:775-986|+	5|LP150221_R1_(paired)_trimmed_(paired)_contig_26486:1014-1023|-	5|LP161083-1_R1_(paired)_trimmed_(paired)_contig_22164:235-244|+	5|FCHL5H3BBXX_L3_wHAXPI062220-17_1_(paired)_contig_142292:429-438|+	N/A	0.43	0.2	0.99	CAGATAAAATGTTGTTGGGTTGATAATAATCATATCTATAAACATTTGCTGTTGGATTTCATCAGATATTCCAATTTGCTTAAAATTTTATGGTAAGGTA	TTTGTTCTTAGACCCTTATACTAATATGTACCCCGTTTTAATGTAATCCAATCGTAATATCAGGTATGGTTGCATATTGTAGCGCAGATGGTAATGTTCA
CPSSR_396	AT	583	6|FCHL5JJBBXX_L2_wHAXPI059581-29_1_(paired)_contig_219203:418-629|+	5|LP150221_R1_(paired)_trimmed_(paired)_contig_140077:1384-1393|-	6|LP161083-1_R1_(paired)_trimmed_(paired)_contig_143909:812-823|+	5|FCHL5H3BBXX_L3_wHAXPI062220-17_1_(paired)_contig_275667:573-582|+	N/A	0.5	0.2	0.99	AGGGCTCTTTATATCCTTAGTCATTAGTAATCTTTATCTATTGCATATGTGATATGATACAAACCTATGGAAGAGGTTCAGGCAGCTTTGGTGGCTGAAG	TTTTTTAAATTATGGTGTTTTGTTGAATAATTAGAATTATAGTGTTCCTCCATAATCTTCTCTCTCTATTCCTCTTGTTTCTTTCCCTTTTTATTCTTTT
CPSSR_397	AT	585	6|FCHL5JJBBXX_L2_wHAXPI059581-29_1_(paired)_contig_225881:187-398|+	5|LP150221_R1_(paired)_trimmed_(paired)_contig_6015:650-659|+	N/A	4|FCHL5H3BBXX_L3_wHAXPI062220-17_1_(paired)_contig_146286:373-380|+	N/A	0.82	0.4	0.96	TCCAATCATCGCCTAACACCTCATGATGGCCTTACGAGGGAAGTTTACAACTGACATAAAGTGAGGGAGCGCCCTCTTGAGAAGCTAATTGTATATCGAA	AATGAGTTTCTAGTTAGAGACCCCACACAAGCATTTGTGTCGAGTTCTGATTGACGACCAAGACTTGTTGACTTAAAACTTAATTAAGCGAAAAAACACA
CPSSR_398	AT	586	6|FCHL5JJBBXX_L2_wHAXPI059581-29_1_(paired)_contig_231833:246-457|+	N/A	5|LP161083-1_R1_(paired)_trimmed_(paired)_contig_225308:227-236|-	6|FCHL5H3BBXX_L3_wHAXPI062220-17_1_(paired)_contig_170996:401-412|+	N/A	0.47	0.4	0.97	TACGAGCTCATTTAACAAGAAATTCAAGAATTCATGGGCATCCTACACATTTTCACAGATTGAATTGGTGTCTGGGATATAATAATTATGATGTTACAAA	AAGAAACTATCCATTGATCATGAAGTTTAAAGTGGCCCATGTGGCGGATGAATTTAAAGTATTTTTGTGAACATGCATTGATCAGATATAATTAATATTG
CPSSR_399	AT	587	6|FCHL5JJBBXX_L2_wHAXPI059581-29_1_(paired)_contig_234328:450-661|+	4|LP150221_R1_(paired)_trimmed_(paired)_contig_22546:2178-2185|+	4|LP161083-1_R1_(paired)_trimmed_(paired)_contig_188795:539-546|-	3|FCHL5H3BBXX_L3_wHAXPI062220-17_1_(paired)_contig_1339:2831-2836|-	4|TCunknown-1_(paired)_contig_9305:1411-1418|+	0.98	0	0.99	GGTTCAGTCTTGATGGCAGCACTTACTTTACACCCCTTTAAATCAAGGAAACCTGCAGGTTAAATATGGAATTGTTGATACTCAGACCCTGAATATACAC	AAAGACTGACGATATTGGTAGAGCTTTTTTTGTTGGTTCAATGACTGAGCAAAATGTTAACTTAGAGCAAAAACAATTTTGCCCCCTTAATTAAACTAGC
CPSSR_400	AT	589	6|FCHL5JJBBXX_L2_wHAXPI059581-29_1_(paired)_contig_241578:559-770|+	5|LP150221_R1_(paired)_trimmed_(paired)_contig_50564:497-506|+	5|LP161083-1_R1_(paired)_trimmed_(paired)_contig_81201:502-511|-	N/A	N/A	0.47	0.4	0.99	TCTAGTTTGGTATGTCGCTTTAGTATATTCTATAGTCTTTCAACGCTAGCATTTCAGACTGTAATACTCATTCATGGATTATACCAAATTTCCTAAGGAA	AAGGTCTACTGTCACTGCAGCAGATCCAGGCATGCACTATATTTCACCTTCAAATTCATTCCTGCAATGACTAGTAAAAATCCATACTACATATAAAGAA
CPSSR_401	AT	593	6|FCHL5JJBBXX_L2_wHAXPI059581-29_1_(paired)_contig_271867:241-452|+	5|LP150221_R1_(paired)_trimmed_(paired)_contig_131106:579-588|+	5|LP161083-1_R1_(paired)_trimmed_(paired)_contig_208111:527-536|+	N/A	N/A	0.47	0.4	0.98	GTCTTTAAAAAATGACAACTTGTGTAATTTGACATCTCCATTTTGTGAAAATATATTGCTAACTAAAAGTATAGGGAAGAATCCTTTGTCAATTTTGTGA	AGATTAATTAAAAGTACTATAGGGAAGAATCCTTTGTCACATCATTGTGGCTTAAGTTATATCATAATCTTGGTTCATACAAAAACTTGCATATACTATT
CPSSR_402	AT	594	6|FCHL5JJBBXX_L2_wHAXPI059581-29_1_(paired)_contig_273420:419-630|+	5|LP150221_R1_(paired)_trimmed_(paired)_contig_72677:490-499|-	5|LP161083-1_R1_(paired)_trimmed_(paired)_contig_271104:243-252|-	N/A	N/A	0.47	0.4	0.99	TAAGGAGAAATGGAACGAGTGTGAAAGGTGAGGTTCTGTGCTGGTTGATCATGGTTTTGTGACAGACTTGTGTAAAATGAGAGAAGGGGTAGTTTGGAGA	AGGTTTGGAAAGGTGCGCATTTTATTAAACTACGCACCAGCGATGCATGATAGTAAATTAGTAATAGAGAAGTATGGTTAGCAATTAGCATGGAACTTGG
CPSSR_403	AT	596	6|FCHL5JJBBXX_L2_wHAXPI059581-29_1_(paired)_contig_283970:417-628|+	5|LP150221_R1_(paired)_trimmed_(paired)_contig_64780:309-318|-	5|LP161083-1_R1_(paired)_trimmed_(paired)_contig_20648:3491-3500|+	5|FCHL5H3BBXX_L3_wHAXPI062220-17_1_(paired)_contig_29420:200-209|-	N/A	0.43	0.2	0.99	AGGTGGAGATAGGTAGAATGATTGTGGTAGTGTAGCAAACTTTTGTTAACTCCATGACATAATCAGGACGTAAGAATTGACTGATAGTACCTCCTTGTGA	TATTTGCTTGTCACCGTCTTTGCAACCTCAACATCAGACACTTGTTATGTAGAAAGACTATGGACATTACAAATTCATCACCAGTCATTGGACAAAACCA
CPSSR_404	AT	597	6|FCHL5JJBBXX_L2_wHAXPI059581-29_1_(paired)_contig_285587:118-329|+	5|LP150221_R1_(paired)_trimmed_(paired)_contig_14280:758-767|+	5|LP161083-1_R1_(paired)_trimmed_(paired)_contig_46987:2369-2378|-	N/A	N/A	0.47	0.4	0.99	CTCGGATGCGCAGAGCTAAGAAAACTTACTTTAGGGTTGTAGAAAGCATCTATAGTTTCGGATAGCTAGGCCAGATAGGTACTAAACCAATGCCACATAA	CAAGGTCAACATCAAAAAGTGGGAAGTTGATATCAAAATTGGGGGAAAGAAAGTGCATGAGCAATGAGCAGTTAAAATCAAGTATGTTGCTTTCTTTGCT
CPSSR_405	AT	599	6|FCHL5JJBBXX_L2_wHAXPI059581-29_1_(paired)_contig_28758:536-747|+	N/A	9|LP161083-1_R1_(paired)_trimmed_(paired)_contig_35712:4955-4972|-	7|FCHL5H3BBXX_L3_wHAXPI062220-17_1_(paired)_contig_186236:123-136|+	N/A	1.25	0.4	0.98	TGTAATTAAACTGTCATTTTTTTAAAAACAAAATTAAAACCTGTTTTACATTTAATTAAGAAATCTAAAACATATTTGCTATTATGCACCATAAACATCC	AAGTTTAAATGTTCTCAAATTTCCATCCACATCCAAAAACAAACTACATCACAAAAGTTTCAATACATCCTTAAAATTAATATCCATCCATGTCATTACA
CPSSR_406	AT	600	6|FCHL5JJBBXX_L2_wHAXPI059581-29_1_(paired)_contig_288234:31-242|+	5|LP150221_R1_(paired)_trimmed_(paired)_contig_36384:210-219|+	5|LP161083-1_R1_(paired)_trimmed_(paired)_contig_237412:564-573|-	N/A	N/A	0.47	0.4	1	TTGCAGCTTCTACACCCCTTTTCCCACCAGAAGTAAAGATGAATGGCTAAATCTTTGGCTGATTTTCGTGCTTAATTTGGATTGCTTAATAATGTCTCAC	AATACTTTAACCGATCCATCTATTACTTGCAGTACTGGTCGCTTTTTATTATAGAGAAGTTATATTGTATATGTACTATTTTCTTCAGGTTTATGTACTG
CPSSR_407	AT	601	6|FCHL5JJBBXX_L2_wHAXPI059581-29_1_(paired)_contig_290706:112-323|+	5|LP150221_R1_(paired)_trimmed_(paired)_contig_185178:106-115|+	N/A	6|FCHL5H3BBXX_L3_wHAXPI062220-17_1_(paired)_contig_122470:290-301|+	N/A	0.47	0.4	0.99	CTTCGTTCATCTGCCTCCCTAAATTAAATCCTCAAAATATTCAATAACAACAAAATCTTATTATAAAAAGATATGCTCAAGTGAAAACCTATGATGGCAG	CATAATCCAACCACTAACTTTAAAAACCAACCTTTTGGCATCTTCCTGAACTTTCTGTTGCTCAGGATTTTGTGAATTTCCCTATTTTAACAAATTTAAA
CPSSR_408	AT	603	6|FCHL5JJBBXX_L2_wHAXPI059581-29_1_(paired)_contig_296299:45-256|+	9|LP150221_R1_(paired)_trimmed_(paired)_contig_154240:722-739|+	6|LP161083-1_R1_(paired)_trimmed_(paired)_contig_35042:2091-2102|+	6|FCHL5H3BBXX_L3_wHAXPI062220-17_1_(paired)_contig_43565:708-719|+	N/A	1.3	0.2	1	AGCTTGGAAAGAAAGAGCCTCTGTCTGTCTACTTGTTTGTTTTTCCCTAATGAAAAGAATCCTACTTCTCAAAGAAACAAATAGAGCGCAAGATTTCTCC	TATTCTGTAAGCTATTGTAGATTCCAATTGCATTTTTAACATGCCACAACTATGGTGTTTTCCAAAATCCAAATGCATTTTTGTCAAAAGCTTGGACTAA
CPSSR_409	AT	604	6|FCHL5JJBBXX_L2_wHAXPI059581-29_1_(paired)_contig_29851:102-313|+	N/A	6|LP161083-1_R1_(paired)_trimmed_(paired)_contig_12400:104-115|-	7|FCHL5H3BBXX_L3_wHAXPI062220-17_1_(paired)_contig_752:5270-5283|+	N/A	0.47	0.4	0.96	ATGGTGAAGAAATATGACAAGATGGATAAAAAACTTGATTTTGTTGTTGACTTTTGTACCGTGAGTCCTAATATTCCTATATGAAACTCCAAAAATGATA	TGTATGCCAAACTAGTTATAAGTATATATTTAACATTTTTTTGGGTCTTGTATCACAGAAATACATACCACCAGCAGGAGCAACCGGTGAGGCATCAACG
CPSSR_410	AT	607	6|FCHL5JJBBXX_L2_wHAXPI059581-29_1_(paired)_contig_42042:541-752|+	5|LP150221_R1_(paired)_trimmed_(paired)_contig_26547:1217-1226|+	5|LP161083-1_R1_(paired)_trimmed_(paired)_contig_131557:145-154|-	N/A	N/A	0.47	0.4	0.97	AAACTATTAAATAGTGGCCAGACTATAGCAGCAGAATCCATATTTACCTCCACATACCTACAAATGAATTCATATTACCCTTTCAATTGTGATGGGCTCA	AAATTAGACACAATAGCCACAGTATTTACCAAGGATCACTGTAAAGATAGTGCATAACAGCCTCATAAGCTTCTTGGAATATGAACAGATACTCTTCATC
CPSSR_411	AT	611	6|FCHL5JJBBXX_L2_wHAXPI059581-29_1_(paired)_contig_50441:454-665|+	7|LP150221_R1_(paired)_trimmed_(paired)_contig_41800:1119-1132|-	8|LP161083-1_R1_(paired)_trimmed_(paired)_contig_96255:238-253|-	5|FCHL5H3BBXX_L3_wHAXPI062220-17_1_(paired)_contig_241060:105-114|-	N/A	1.12	0.2	0.99	TTTCAAGTGAGTTCTGAAAACTAAATTTACTCTTATTGTTCTGTATCTTATACAGTAGAATTTAGGCATTAAAAGGATACAGTACCATATGATTAGATTA	GGTTTAATGGGCAGTGAAGAAAGGGCAGATTGTAAGGGTGGAGAAGGAAAAATATCTCATTAGTGTCAATGTAAGTACCTCTTTTTCTTCATTTTTTATC
CPSSR_412	AT	613	6|FCHL5JJBBXX_L2_wHAXPI059581-29_1_(paired)_contig_60491:660-871|+	5|LP150221_R1_(paired)_trimmed_(paired)_contig_154416:2103-2112|+	5|LP161083-1_R1_(paired)_trimmed_(paired)_contig_118676:1411-1420|-	N/A	N/A	0.47	0.4	0.96	ACATTTTAAATCTAGATTTTTTAATGAAAGCGAGGTTCTGTCAAGCTGCCAAGTAACACCTCAAACACCAAATTGGTAATCAAACTCAATGATTACCTCC	AAGTATGATTACCTCTAAATGTTAGTTTTATTACTAATATCCACATGTTTTCCCTAGTCATAGTTGTAGTTAGATGTATTAGTATAGTTTTAAGGATCAC
CPSSR_413	AT	614	6|FCHL5JJBBXX_L2_wHAXPI059581-29_1_(paired)_contig_61901:98-309|+	5|LP150221_R1_(paired)_trimmed_(paired)_contig_173998:106-115|-	5|LP161083-1_R1_(paired)_trimmed_(paired)_contig_225451:648-657|-	5|FCHL5H3BBXX_L3_wHAXPI062220-17_1_(paired)_contig_230196:140-149|+	N/A	0.43	0.2	0.99	AGCTTCTCTGCTTAACATGGTTCTTAGTTACAGATACTGCCACCTCAAGATCATGATTGTCGTGGTTGCAGAGTTACAACATAAACCAGGGCAATGCAAA	CAAAAGGATTGCAAAACTAACTTTAAAAAGCACAAATAAATAATAAAAAATCACGTTGGAAGTGTATAACAAACAATTTCACAAACATAATATAGTCTAA
CPSSR_414	AT	616	6|FCHL5JJBBXX_L2_wHAXPI059581-29_1_(paired)_contig_68573:45-256|+	5|LP150221_R1_(paired)_trimmed_(paired)_contig_74719:325-334|+	5|LP161083-1_R1_(paired)_trimmed_(paired)_contig_42052:598-607|-	N/A	N/A	0.47	0.4	0.99	ACATGTTTTTATCAAAATGGATATCTATGTTATCATCTGAGATACTCTTTTCTACATGTTCATTTTGATGATGTTTTTGTTTGTGTTAGCCAGTATTCAA	AGTCTGTACTCTAGAGATAATTCTCGAATATGTTGGTGCACCAAATCTAAATTGATTCAGAAACTGAACACTGACTTAATATGTTACAGTTAGTATTTGG
CPSSR_415	AT	617	6|FCHL5JJBBXX_L2_wHAXPI059581-29_1_(paired)_contig_70011:200-411|+	4|LP150221_R1_(paired)_trimmed_(paired)_contig_149368:181-188|+	N/A	5|FCHL5H3BBXX_L3_wHAXPI062220-17_1_(paired)_contig_212490:329-338|+	N/A	0.82	0.4	0.98	TTGATATTGGGTGAAATTTCCTTCCTAATTTAAGTGTATTTGCTGGAGATTAGTTTATATTACTGAGGTGTATCTCCATTGATCATGGCTGATTTGACAA	TTTCCTTGCTTAGCTAGCAAGATTAGTCTAAAAGTAAACTTGGGCCATAAGGAGACCTATTCTTTGCTTTTGGGCTACAAGATGATTAGCCTCCTTCTAT
CPSSR_416	AT	618	6|FCHL5JJBBXX_L2_wHAXPI059581-29_1_(paired)_contig_71992:146-357|+	5|LP150221_R1_(paired)_trimmed_(paired)_contig_95386:110-119|-	5|LP161083-1_R1_(paired)_trimmed_(paired)_contig_93213:178-187|+	N/A	N/A	0.47	0.4	0.99	CGGATAATAAATAATACTCGTTCATAAACCGTAACGTACGCGACATAACATTAATAATACTAATGTGCGTGAATAGTAACGTGCGACCATGACGTAAATA	AATACGCACATAAATAATATGTATACATCAAGTAACAAGTCACAACACGTAAATAATTAAGTACACAAATAATAGGTAGATAAAACATACCAAGTAATAG
CPSSR_417	AT	620	6|FCHL5JJBBXX_L2_wHAXPI059581-29_1_(paired)_contig_74287:2500-2711|+	N/A	4|LP161083-1_R1_(paired)_trimmed_(paired)_contig_161183:329-336|-	4|FCHL5H3BBXX_L3_wHAXPI062220-17_1_(paired)_contig_29687:801-808|-	N/A	0.94	0.4	0.98	TCCATGTTAGCAGAAAATCCATCACCGGGCAAACATGAATCAGAGAAAATAATGATTTAGCAAATACAAGCACAATGGGGATTTCAACTTCAATAAACAC	ACACACACACATTGGGACACGCCAACTTTGATACTAGATTTTCATATAAAGTTTTGAATGCTTAAGGCATCAAATTTCTCAAAGTGTGACAATCAATTTT
CPSSR_418	AT	621	6|FCHL5JJBBXX_L2_wHAXPI059581-29_1_(paired)_contig_81972:388-599|+	5|LP150221_R1_(paired)_trimmed_(paired)_contig_30432:368-377|+	5|LP161083-1_R1_(paired)_trimmed_(paired)_contig_123942:169-178|+	7|FCHL5H3BBXX_L3_wHAXPI062220-17_1_(paired)_contig_98233:1295-1308|+	N/A	0.83	0.2	0.98	CAAATTATTAAATGGGTCATATACGGATTGACACATTTCAATCTGCAAATCCGTCACGAATATGGTACGATACGACCCATTGCCAGATCTAATCTATATC	TTTAGAAAGCTTGCTTATTGAATAAAGATTTATAGAAGGAGAGACTTTTTTGGTCTCTTGTTTAAAAAAAAGTTGTTAACAATTTATTTATTTATTTCAA
CPSSR_419	AT	622	6|FCHL5JJBBXX_L2_wHAXPI059581-29_1_(paired)_contig_89149:113-324|+	5|LP150221_R1_(paired)_trimmed_(paired)_contig_62907:789-798|-	5|LP161083-1_R1_(paired)_trimmed_(paired)_contig_25456:902-911|+	N/A	N/A	0.47	0.4	0.99	CATTAAGTACCCTTATCTCCCTAGTAAGTATTAATAACTACATTTCTCTGCCTCGCAACAGCAGCATTTTCGTTAAGATTTTAAGTGATTTAATACTTTG	AAACACATACACTCACACATATATATGCATGTGTGTCCCACACATTGCGCTATAAAGTAGAAAAAGAAAGGGAAAAAAAAGGAAAAGAAAGAGAGGATAT
CPSSR_420	AT	623	6|FCHL5JJBBXX_L2_wHAXPI059581-29_1_(paired)_contig_90845:1552-1763|+	5|LP150221_R1_(paired)_trimmed_(paired)_contig_26415:1151-1160|-	5|LP161083-1_R1_(paired)_trimmed_(paired)_contig_445:330-339|-	N/A	N/A	0.47	0.4	0.98	GAAAATCGGATAGTTTGGTGTGCATTTTCTTATTTAAGTATTGAACTGGTTTATGATGTGACAGTGTCTAATTTCCAATGTATCTTACCTGCTTATATAA	GCATTTATCACAGGCTTAACTGTCTCAACTTCTGGAGAATGTAAAAAATAAATTGCATCTACATTCCACTCTATACTTGGTATTTTATGATTTATCATGT
CPSSR_421	AT	624	6|FCHL5JJBBXX_L2_wHAXPI059581-29_1_(paired)_contig_93092:3-214|+	8|LP150221_R1_(paired)_trimmed_(paired)_contig_71734:3318-3333|-	10|LP161083-1_R1_(paired)_trimmed_(paired)_contig_126383:309-328|+	N/A	N/A	1.63	0.4	1	CTTTTACATAAGCATGACAGATGGTTTGCCATGCGGCGCTAAATGGGGACTGCAGAACAACAAGATGAAAGATCTAAAACATGGTAAGAAACCACTGCTC	CTAGACTAGAATGGTGTTTATTCATATTCCCTAACAAATAAATCCACTATTATCCAAGTTCTATGTTCTTCAGAAAAAAAATGTTTCTGCCAAAATTTGC
CPSSR_422	AT	625	6|FCHL5JJBBXX_L2_wHAXPI059581-29_1_(paired)_contig_95818:403-614|+	5|LP150221_R1_(paired)_trimmed_(paired)_contig_1997:1041-1050|+	5|LP161083-1_R1_(paired)_trimmed_(paired)_contig_107137:831-840|+	N/A	N/A	0.47	0.4	1	CGAATTCGCCAGAGACGTGCTTCCGAAATATTTTAAGCACAACAATTTCTCTAGCTTCGTTCGTCAACTCAACACCTATGTAAGCCCCTCGATACAATCG	AATATGAAAGGTGTATGTGTATGTAAATGTTTCTTCGATTTGGATGTTTATATAGGTTTATTTTTGTGATGATTTTTATAGGGATTTCGTAAGGTAATAC
CPSSR_423	AT	626	6|FCHL5JJBBXX_L2_wHAXPI059581-29_1_(paired)_contig_97094:425-636|+	5|LP150221_R1_(paired)_trimmed_(paired)_contig_30319:4069-4078|-	5|LP161083-1_R1_(paired)_trimmed_(paired)_contig_213352:795-804|+	N/A	5|TCunknown-1_(paired)_contig_51569:144-153|+	0.43	0.2	1	AAAAGAAAGGGTGACAGGATATCAGATTCAAGGTTAACCATCTAGCTCTTTACTTTTCACTTTCTTTGCAGATCAAATAGATACCCCAGCAGAAAGGAAC	AAGGACCTATGCATATAATTTTGGGCCTAACGATAAAATCATGATTTTTCAACTTTAATAGAAAAAGACAAGTCTATAACGTACCTAAATTGGCATGAAG
CPSSR_424	AT	627	6|FCHL5JJBBXX_L2_wHAXPI059581-29_1_(paired)_contig_99218:189-400|+	5|LP150221_R1_(paired)_trimmed_(paired)_contig_66534:599-608|+	5|LP161083-1_R1_(paired)_trimmed_(paired)_contig_73202:604-613|+	N/A	N/A	0.47	0.4	0.99	AATTTTAAGGAGCGCCATATCTACGAGTAATCACCAGTTTTTATTGTCCAAACATATGTGTTCTCTCTTTTTTTTTGGTCCACCGGAGCCTTCACTGTGC	GGGCCATACAATACAAGGGTAGGCATATCCCTACCATAAAAGTAAAACTCTCCCTTTCCTAATGAAATCAGAAGCAATCTAAAATTTCAATACATGACGC
CPSSR_425	AT	629	7|FCHL5JJBBXX_L2_wHAXPI059581-29_1_(paired)_contig_112877:729-942|+	10|LP150221_R1_(paired)_trimmed_(paired)_contig_136131:242-261|-	8|LP161083-1_R1_(paired)_trimmed_(paired)_contig_65327:451-466|+	N/A	N/A	1.25	0.4	0.98	GACAAAATAACCTCATATTTACAGTCAAGATCCTACAGTCCATTACACTGTCATCTATGCTACATTATATAGTCTGAATTTGATACTGATTTCATTACAA	GTTTTTTTTTATAGGTAGGTGTCGATAGGTTATGGAGCCTGATTCGCATCTGAAGCCTGCGTGGATCGACTTCAAAAAGGTTGGGTCAACCCGCTGTATT
CPSSR_426	AT	630	7|FCHL5JJBBXX_L2_wHAXPI059581-29_1_(paired)_contig_114280:102-315|+	8|LP150221_R1_(paired)_trimmed_(paired)_contig_65807:366-381|+	7|LP161083-1_R1_(paired)_trimmed_(paired)_contig_20625:397-410|+	N/A	N/A	0.47	0.4	0.98	AAAACAAAATGATTGAAGATTTGAATATTGCATAAAAATCATACCTAACCAGATAGAGATAAAACATCAGATAGGGGTTTAGAAAATATTGCATAAAATC	ACGTGTTTGATGAAAATGGATTAAAGATAATGACCCTCTCTTAAAAAAGTTATTTACTACTACATCAGTGTACAACTTTTTGTTGCATGCCTATCAAAAC
CPSSR_427	AT	631	7|FCHL5JJBBXX_L2_wHAXPI059581-29_1_(paired)_contig_122689:361-574|+	8|LP150221_R1_(paired)_trimmed_(paired)_contig_11359:2504-2519|-	7|LP161083-1_R1_(paired)_trimmed_(paired)_contig_147944:487-500|+	7|FCHL5H3BBXX_L3_wHAXPI062220-17_1_(paired)_contig_126658:348-361|+	4|TCunknown-1_(paired)_contig_75733:610-617|-	1.36	0	0.99	TGATGTAACATTTGATGGGGGGTCCTTTTTTATGTCTATACACAAAATGTCTATTACTTTGTTCTGAATGTAGACAAAAAGTATATACTCAAATGTATCC	GCATAAGTTTTAGAATGATGCATTTAGTACTGTTGTGCTTAATTTCAACATGTTAGTATGTTACACCTTAAATAGTCCAGTGAGATAAACAAACTTTTTG
CPSSR_428	AT	632	7|FCHL5JJBBXX_L2_wHAXPI059581-29_1_(paired)_contig_13735:840-1053|+	6|LP150221_R1_(paired)_trimmed_(paired)_contig_98312:2631-2642|-	6|LP161083-1_R1_(paired)_trimmed_(paired)_contig_188115:1216-1227|+	8|FCHL5H3BBXX_L3_wHAXPI062220-17_1_(paired)_contig_50162:460-475|-	N/A	0.83	0.2	0.98	ATCCTATGTTTTTCTAAAGTGAATTATCCTTGACTGTTAGAGCAAAAACCAACTGTCGATATTAAAGGTACTGATCTAACTTGGATGTCAGAACCCGCGC	TGGGGAGCTAATCAAGCAGGACATAAAACCCCAAAATCCAACTTTTAAAGAATAAATAGTTGTCCAATTCTCTACTTCTATGCTCTGATATCAGAGAGGT
CPSSR_429	AT	634	7|FCHL5JJBBXX_L2_wHAXPI059581-29_1_(paired)_contig_14957:141-354|+	11|LP150221_R1_(paired)_trimmed_(paired)_contig_32253:3680-3701|-	10|LP161083-1_R1_(paired)_trimmed_(paired)_contig_8073:629-648|-	N/A	N/A	1.7	0.4	1	CTACCCCTCAGCATTTCCCGGATGCACTAATGTTAAAGCTTCAATTAACATGTCAATATGTGCATACTAGAAGGAAATGATGACATGATAAAGTAACGCC	AATATCTTCCATTTAGAAATGTGGTCAGTCGAATATCCAAGCCTGGAAATCACATAGACAAAGATAATCTATGCCAGAGTTGTTCAATTAGTATTATTAT
CPSSR_430	AT	636	7|FCHL5JJBBXX_L2_wHAXPI059581-29_1_(paired)_contig_179943:259-472|+	5|LP150221_R1_(paired)_trimmed_(paired)_contig_106261:604-613|+	5|LP161083-1_R1_(paired)_trimmed_(paired)_contig_119277:933-942|-	N/A	N/A	0.94	0.4	0.99	GCACACCCCACCAAACTTCCATTCCCCCATTCATGATAAGATAAAAATAGACAAAATGCAACAAAGTGGTCTAAAGATAAAAAGGAAAGGATAATAAAGC	GCTTACTAACTATGATATGACCTACCAAAAAAATTCCAACTTCTTTGGAAAAAAAACAATTAAAACCACATGTTGTCCATCTTTGATGTTCCTTTCCTGA
CPSSR_431	AT	637	7|FCHL5JJBBXX_L2_wHAXPI059581-29_1_(paired)_contig_18613:424-637|+	6|LP150221_R1_(paired)_trimmed_(paired)_contig_34372:5202-5213|-	6|LP161083-1_R1_(paired)_trimmed_(paired)_contig_41990:280-291|+	5|FCHL5H3BBXX_L3_wHAXPI062220-17_1_(paired)_contig_92346:327-336|-	N/A	0.71	0.2	0.98	TAAGCTAATAGAGTACAACGTGCGCTTTGGAGATCCGGAGTGCCAGGTCTGTTAACCGATCTCTCTTATTAATATTCACCTTACAACTTTTCAAAAAAAA	TCACTTACAACTTGTCAAAACAAAAATATGCAACTTACAACTTATCAAAACAAAAAAATTCAACTTATGACGAAGCTCTGAAATTAATGAGCACGATCAC
CPSSR_432	AT	638	7|FCHL5JJBBXX_L2_wHAXPI059581-29_1_(paired)_contig_196226:120-333|+	5|LP150221_R1_(paired)_trimmed_(paired)_contig_233024:408-417|-	5|LP161083-1_R1_(paired)_trimmed_(paired)_contig_203275:401-410|-	N/A	N/A	0.94	0.4	0.98	TTGTAACCAAAATTAGAGCTGGACAATAAATACTTTCCCTTTAATTTTCTAATATTGGTATAGATATTGATATTGCAACTTTTAATTTTCAAATTGGGCC	GTCTACTATCAAAAGACAATATTATCCATCCATCCATACATACATATGGAACATTTCTCCCATGTGCCCCTAATCCGTCTCCAGAAATTATGAGAGAAGA
CPSSR_433	AT	639	7|FCHL5JJBBXX_L2_wHAXPI059581-29_1_(paired)_contig_198326:4-217|+	5|LP150221_R1_(paired)_trimmed_(paired)_contig_103619:688-697|+	6|LP161083-1_R1_(paired)_trimmed_(paired)_contig_9238:1043-1054|-	N/A	N/A	0.82	0.4	0.99	ATAATGCCGAGCAGTGAACGGACGGTGGTAGAGCTGACATGCTCGATATGGGGATACTAAGGGGATACCCTTCTGCTTATTACTGTGATGTGACTGTGTA	ACTTTTATGTACTAGTAGTTGTGCTAAGTTTCTGGACCTCTTTTGATGTAATAAGTTAGTATGATAGAACTGCCACTTGTTGACTATTTATGGTGGATAT
CPSSR_434	AT	640	7|FCHL5JJBBXX_L2_wHAXPI059581-29_1_(paired)_contig_198845:53-266|+	6|LP150221_R1_(paired)_trimmed_(paired)_contig_64652:387-398|+	6|LP161083-1_R1_(paired)_trimmed_(paired)_contig_43408:713-724|+	6|FCHL5H3BBXX_L3_wHAXPI062220-17_1_(paired)_contig_29407:257-268|+	N/A	0.43	0.2	0.98	TAGTTTTATCCCATGATTCTAATTGGTCATCTCCACCAAACATTAAAATTGAGACGGCGACTAGATCCGGGATAGTACCAACTTAAGTAATATTCTGCTC	GGAAGAATCTGATGTGTCCTTTTTTATTGAATCAGCGGCGGAAGGGGATGCTTTCATTGCCAAGGATATGGGATTTGAGAACACGGCCGGACCTTCAAAG
CPSSR_435	AT	641	7|FCHL5JJBBXX_L2_wHAXPI059581-29_1_(paired)_contig_202758:74-287|+	6|LP150221_R1_(paired)_trimmed_(paired)_contig_7190:1106-1117|-	6|LP161083-1_R1_(paired)_trimmed_(paired)_contig_128712:231-242|+	N/A	N/A	0.47	0.4	0.98	TTATCATATCGGTTGACATAATACTGAATAATTTTTCAGTATTTTGAATATGTGATTTTTACAAAAGGCTTTGTAACGAGACAAATTAAAGATAATGACA	GGCATGAAATTGTAACCTGTCAATACATTTGGATGTGGAAATAACAGTACACACATGAATGGCATTTATGTTGTTGGTTATTACTTATTACAAGATATAT
CPSSR_436	AT	644	7|FCHL5JJBBXX_L2_wHAXPI059581-29_1_(paired)_contig_223910:134-347|+	6|LP150221_R1_(paired)_trimmed_(paired)_contig_11367:922-933|-	7|LP161083-1_R1_(paired)_trimmed_(paired)_contig_76343:1597-1610|+	N/A	N/A	0.47	0.4	0.99	AAAACAAAATGGCACCATTGTCAAATGATTGGAAGCACTTAAACAACATAATAACTGGTCAAATGAGCTAAAAACACATGAACAAGAATAAAAATAGCCA	AAGTCATCATTACAGCACAAAAAGAAAGCTTTCTACTAGTCACTGCCCTAAAATTCTAACGATTAACAGCTTCAAATTGAATGAACAGAGAGATCAATGC
CPSSR_437	AT	648	7|FCHL5JJBBXX_L2_wHAXPI059581-29_1_(paired)_contig_261001:220-433|+	4|LP150221_R1_(paired)_trimmed_(paired)_contig_59243:693-700|+	N/A	4|FCHL5H3BBXX_L3_wHAXPI062220-17_1_(paired)_contig_127420:295-302|-	4|TCunknown-1_(paired)_contig_442:918-925|+	1.3	0.2	0.99	GCATCTCTTGGTAGTGTGACTGTATCCCAGCCTAAGCTTTCAAGCAGTGCTCACAGATTCAATTCTATGGTTCAGGTGATCAACTTGATTCGTCTACAAA	CTTTTCCACATTTAAAGACTCGTTTTATTTGTCTTGTCCATTTCTTCTTCTTATAAGAAAGATTATTTCTCCATTTCTTGCATGAGGCCGGTTATGACTG
CPSSR_438	AT	650	7|FCHL5JJBBXX_L2_wHAXPI059581-29_1_(paired)_contig_292003:453-666|+	8|LP150221_R1_(paired)_trimmed_(paired)_contig_147584:517-532|-	6|LP161083-1_R1_(paired)_trimmed_(paired)_contig_29861:533-544|+	N/A	N/A	0.82	0.4	0.99	ACATGCTTGTATTGACGGGAACGCAGGACGCTGAAAAGCTATTGTTGCTCAAGTCTTAATTCCAGATTTATGAGTCTGAGTGGGTATAGATTATATGCTA	GTGTAATTTTTATCTACATGCTTGTATTGACGGGAACGCAGGACACTGAAATGCTATTGTTGCTTAAGTCTTAATTCCAGATTTATTAGTCTGACTGGGT
CPSSR_439	AT	651	7|FCHL5JJBBXX_L2_wHAXPI059581-29_1_(paired)_contig_302663:31-244|+	6|LP150221_R1_(paired)_trimmed_(paired)_contig_132139:1255-1266|+	5|LP161083-1_R1_(paired)_trimmed_(paired)_contig_195029:619-628|+	N/A	N/A	0.82	0.4	0.99	GTGCTGCTTGTGGCTGCCACAGGAATTTCCACAGAAGGGAAGTGGAAACTGAGGTAGTTTCTGAGTGTTCTCCCCCTCATTCTTATTATCAATAGTTTGG	AATTATGTACTGGGATTTTATTAAAAGAGAAATGACTGATTGTTTCGAGAGATAAAATTGTGTTGCTTGTGTTTATTTTCTCCATCTATATTGACAGAAC
CPSSR_440	AT	652	7|FCHL5JJBBXX_L2_wHAXPI059581-29_1_(paired)_contig_5430:579-792|+	8|LP150221_R1_(paired)_trimmed_(paired)_contig_69944:1014-1029|+	4|LP161083-1_R1_(paired)_trimmed_(paired)_contig_132821:1223-1230|-	N/A	N/A	1.7	0.4	1	TGATAGAGTTACCGTTCGCCATCATGCAGTTGACAAAACTTACCAACCTGGTCCCCTCATCCCAAATCAGGTAATGTGCCGTGAGTTTTTTGAACATTGG	ACTAATGTCAGGGGGAGGGGGGGTGTGGAGGATGTCAAAAATAAGACCATCCTGTTTGGCAATATTTAAGTTGCAAGTTGGATTCATGAAAGTGCTGCAT
CPSSR_441	AT	653	7|FCHL5JJBBXX_L2_wHAXPI059581-29_1_(paired)_contig_57696:1-214|+	8|LP150221_R1_(paired)_trimmed_(paired)_contig_84506:409-424|+	N/A	7|FCHL5H3BBXX_L3_wHAXPI062220-17_1_(paired)_contig_713:599-612|-	N/A	0.47	0.4	0.97	GGCTTGTGCTTGGTCTAAATGAGTATACTAGTAATAATTTTTTTATGTAAAATGTTGCCCTATGTTATTTTCTTGAAGGGTTGCCCGAACCAGGGGCTTG	AGATCACTACACTTTTACTTTTCCTAGAAGATCCTCCTAACCTAACACTCAACTTTAACCCCCAACAAGTGGATTGGAGCCATGTACTTCAATTGAATTT
CPSSR_442	AT	654	7|FCHL5JJBBXX_L2_wHAXPI059581-29_1_(paired)_contig_61175:969-1182|+	N/A	8|LP161083-1_R1_(paired)_trimmed_(paired)_contig_79468:622-637|-	6|FCHL5H3BBXX_L3_wHAXPI062220-17_1_(paired)_contig_43764:1009-1020|-	N/A	0.82	0.4	0.99	AGTGTTCATTAACAGATCACTTGCCTTTTTTTACAACCAAATCCAGGTTACCATTTCTCTAATAACCAAATACAAAATGTAATTATCAATTTCCATATTG	AGTCATTTATTCTTTGATTCTTTTCTGCTTAGATTTTGTTATTATTATGACCCTGCTATTGTGGATTATATATACTTGCATTAAAACTTAGACATTTTTT
CPSSR_443	AT	655	7|FCHL5JJBBXX_L2_wHAXPI059581-29_1_(paired)_contig_61325:439-652|+	5|LP150221_R1_(paired)_trimmed_(paired)_contig_20418:1378-1387|+	5|LP161083-1_R1_(paired)_trimmed_(paired)_contig_139424:195-204|+	N/A	N/A	0.94	0.4	0.99	TGTTTAAAGATCTTTGCGTCCGGAGAGTCTGCTGGGAGCTTCAGCAAAGCTGGGGAATAACATCACATCATTATTAAATTTCGATAACTTGTTAGGCTTG	ACACACTGTTAGTTCACTCTCTAGTCGCTTAAGCTTTTAAATAAAGTGGTGTGTTTTAACATGTTAACAGAGTTTGGTTCGCGAAATGTCAATGATTCTA
CPSSR_444	AT	657	7|FCHL5JJBBXX_L2_wHAXPI059581-29_1_(paired)_contig_65847:510-723|+	N/A	N/A	5|FCHL5H3BBXX_L3_wHAXPI062220-17_1_(paired)_contig_95878:878-887|+	5|TCunknown-1_(paired)_contig_60271:549-558|+	0.94	0.4	0.99	ATAAGGCTGAAGCTCCTGTCTAGAAACAGATAGAAGTACTCCTTTCCTACATATTCCACACTAACTTGTCATACGATTGTGATGAATGCCTGTTAATTCC	ACAGTCAACTCATACATGCTAGTATGCTACCCCATAATGTAGAGCTAAGTCCTAACCTGTATAAGTAGTGATGCACGGCGACCACTAAGATCAATATCAG
CPSSR_445	AT	658	7|FCHL5JJBBXX_L2_wHAXPI059581-29_1_(paired)_contig_69377:217-430|+	3|LP150221_R1_(paired)_trimmed_(paired)_contig_44943:289-294|-	N/A	3|FCHL5H3BBXX_L3_wHAXPI062220-17_1_(paired)_contig_131711:656-661|-	3|TCunknown-1_(paired)_contig_154977:809-814|-	1.73	0.2	0.98	CTCTTGATTCCAATACCTTATTCCTCACCTTAAAATCAACAAAAGAAACAACCTCAAAATTCACAAAACAAAACAAAAAAACTGAAACTTACGAAAGTAA	ACACTCAAATTTCATACTGTCTCAGGTGTGTACTTGCGAAACGGAATGCAGACGCCACGCTCGATGTCCAGCTGCTCCATCGCAGTACTACTAGAGCTAG
CPSSR_446	AT	659	7|FCHL5JJBBXX_L2_wHAXPI059581-29_1_(paired)_contig_76257:888-1101|+	9|LP150221_R1_(paired)_trimmed_(paired)_contig_59982:1375-1392|-	9|LP161083-1_R1_(paired)_trimmed_(paired)_contig_42024:135-152|-	8|FCHL5H3BBXX_L3_wHAXPI062220-17_1_(paired)_contig_83314:950-965|-	N/A	0.83	0.2	0.99	TTGGAATCAGCTTCTTGGCAAACTTGGTCACCTTGACATGGGGGTGGCCTTAGATGTGGAAGTACTGCCGATAATGTTAAGCATACCATCCCCTGATTTC	CAACATAAAATTCATTACATAAGTTTAGTAATCCTAATTATAATTAAGCTTTAGGTACTGACACACGAACATTAGAAAATGCATCGTTTAAAATCTCGCC
CPSSR_447	AT	660	7|FCHL5JJBBXX_L2_wHAXPI059581-29_1_(paired)_contig_84563:16-229|+	6|LP150221_R1_(paired)_trimmed_(paired)_contig_171966:156-167|-	5|LP161083-1_R1_(paired)_trimmed_(paired)_contig_78968:620-629|+	N/A	N/A	0.82	0.4	0.97	TCAACTTTCAACGATCGCCCATAAAAACCCTAAACAAACACGATCAATACGAATCGAAGTATGAACAAAACAACATCAATCACAATACATACATACATAC	ACGCACACATATATGATTTAAGGATTCAATACTGAAAATCAATTGGGATTTACGAACCTGATTGTTGAGGATTAGAAGAAGCCATGAAAAGAGGAGACAA
CPSSR_448	AT	661	7|FCHL5JJBBXX_L2_wHAXPI059581-29_1_(paired)_contig_84786:427-640|+	5|LP150221_R1_(paired)_trimmed_(paired)_contig_103530:1856-1865|-	5|LP161083-1_R1_(paired)_trimmed_(paired)_contig_103151:937-946|-	N/A	N/A	0.94	0.4	0.99	TACCTTACATGTATATATATACATGTATTGAAGTTAGTTCATGTTAAAATTATCACTTGAACTAAAAGTTTAAGCTTTATAGAGAGAGGGCCGTCTAACA	GAAGCTGATGGAAGTTAATAGTTCAGTTGATAGAAATGCGCAAGGGAGTGAAAGACAGGAACAACCACAATAATCGATGTGCAAAGCCGAGGGCTTGATC
CPSSR_449	AT	664	8|FCHL5JJBBXX_L2_wHAXPI059581-29_1_(paired)_contig_120454:238-453|+	6|LP150221_R1_(paired)_trimmed_(paired)_contig_58105:2020-2031|+	6|LP161083-1_R1_(paired)_trimmed_(paired)_contig_24711:1578-1589|-	N/A	N/A	0.94	0.4	0.99	CTTCTTATTAACGTTTTTGGAAAGCCACTGAAAATAAAATCATAACAAAGCGTTAAATTCAAATAACAGTCTCTTAAAGGACTGAAAATAGAGTGTTAAA	TATGCATGCCTTTTGACACATTTATGCACCCTGGGTTTCATCACTGTATGCACATCCTCCTGTAAGTTTGATATACATTGTCGGTCCATCACCAAACAGC
CPSSR_450	AT	666	8|FCHL5JJBBXX_L2_wHAXPI059581-29_1_(paired)_contig_12613:95-310|+	5|LP150221_R1_(paired)_trimmed_(paired)_contig_49828:317-326|-	N/A	9|FCHL5H3BBXX_L3_wHAXPI062220-17_1_(paired)_contig_71863:250-267|-	N/A	1.7	0.4	0.98	TTCTCAACAGTACGCAGCGGAAAACTCAAAAGTATAGCATCAAATACATCTGGAGTAATTACAAACCAACTCTAAACCAGCCTAAAGGCCAGGAGCTCAC	ACAACAAAAGATGATGCTACAGTACTTTAATAGTACCAAAAGGGGTCTGAATCCTACATACAGTAGCAGTACATATATATAAGTCTATTACATGTTAAGC
CPSSR_451	AT	667	8|FCHL5JJBBXX_L2_wHAXPI059581-29_1_(paired)_contig_153586:214-429|+	5|LP150221_R1_(paired)_trimmed_(paired)_contig_191075:112-121|+	N/A	5|FCHL5H3BBXX_L3_wHAXPI062220-17_1_(paired)_contig_151704:175-184|+	N/A	1.41	0.4	0.99	CTCAATATTTTGTGAATTATGTTTTTGACGCATTTTGGTTAGACTTTATTGAAAATTTTAAATGTCTCTCTTCTCGGGATGGGGTGTTTCCTTAAAAGGC	TAAGGGAAGCACTTAAATTCAGTTTTCCTAAGAGAAATGAAGGTCTCATCAGCAAAAAATAAATACTAGGAGTATAAATAAAAGAAGGGGAGGTCTTGTA
CPSSR_452	AT	668	8|FCHL5JJBBXX_L2_wHAXPI059581-29_1_(paired)_contig_165546:708-923|+	3|LP150221_R1_(paired)_trimmed_(paired)_contig_223530:506-511|-	4|LP161083-1_R1_(paired)_trimmed_(paired)_contig_74813:1522-1529|+	N/A	N/A	2.16	0.4	0.93	TGGATATAAGATAGGCAATAGCTAAAAGAATGTCTTAACTTTGGACATCCAGAATCTTATACAGTATCATTTAGGCAACAGTATAGAACAGTTATAAAAA	AAAAAATAGAGATCATGTTCCTTCCAGGCCAAGGACCATATACCACAAACAAAGCAGAGGATTTTTTTGCTCCACTTGAATCACATTATATATGTCTTTG
CPSSR_453	AT	669	8|FCHL5JJBBXX_L2_wHAXPI059581-29_1_(paired)_contig_168277:381-596|+	10|LP150221_R1_(paired)_trimmed_(paired)_contig_81905:1451-1470|-	9|LP161083-1_R1_(paired)_trimmed_(paired)_contig_245082:233-250|-	N/A	N/A	0.82	0.4	1	AAAACTAGACAAAATAAGCCATGCTTTCCCATGCTAGGAGCCATGATATGTTTGCAGTTTGCTTGAAGAGAGAATGGAGATGGAAGGGGCTAATGGAGGC	AGAGAGCCGAGAGGTAGAAGGAAGGGGTTTAAATTTTTTTGACACAGAATCAAAGTTTTCTTTTTTTGGTTAAAGATAAATATGTTAAGAGTTGCTTTTA
CPSSR_454	AT	670	8|FCHL5JJBBXX_L2_wHAXPI059581-29_1_(paired)_contig_190276:22-237|+	6|LP150221_R1_(paired)_trimmed_(paired)_contig_98791:535-546|-	7|LP161083-1_R1_(paired)_trimmed_(paired)_contig_28322:2109-2122|+	6|FCHL5H3BBXX_L3_wHAXPI062220-17_1_(paired)_contig_76256:461-472|+	N/A	0.83	0.2	0.98	AAAACAATCACTGGCATAATTTTGCTTCATAATAAATATTGTGCCCTTTTTTTCCCAAATATATCAGCATCACTACATCTTCCTAAGCTAAATGCTTGCA	AACAGGTTTAGTAGCAAATGCAAGAACATTTCAGTTACATGAAATGGCATGAGGCAGGCTACTCATCAGTTTTGTTCAGAGAAGAATGGGCAGCATTAGC
CPSSR_455	AT	671	8|FCHL5JJBBXX_L2_wHAXPI059581-29_1_(paired)_contig_219191:683-898|+	9|LP150221_R1_(paired)_trimmed_(paired)_contig_154504:1253-1270|-	9|LP161083-1_R1_(paired)_trimmed_(paired)_contig_98351:1067-1084|+	N/A	N/A	0.47	0.4	0.97	TTTCCCTTGGTAATATGTAACATGTAATGGCCAAATCGCCAATGCTATCATAACTGCATGCGGTTTGCCGGTTTTGCTACTAGTCCTTATACATACATAC	ACACTATACACACATATACAAATACATCTAGCTACAATATATCCTAAATCATGCACAAAATGAGAAAGGAATAAGCATGTTGCTATCACAAACCTGCTCA
CPSSR_456	AT	672	8|FCHL5JJBBXX_L2_wHAXPI059581-29_1_(paired)_contig_222059:293-508|+	N/A	9|LP161083-1_R1_(paired)_trimmed_(paired)_contig_101922:311-328|-	10|FCHL5H3BBXX_L3_wHAXPI062220-17_1_(paired)_contig_299454:114-133|-	N/A	0.82	0.4	0.99	TTTAACCTAATTCAAAATTTGAATACCTTATCACTCACATACACTTATTTTCACTATTCATTACTATTCAAGTCCCTTCTGTTTTATTATATACGTATAC	TGCGTTGATTTAACGAGTATGTTTGTTTGTAAGTATTTTTTTGGCTTGTACCTCTTAAAAAATACTTGGTCAGACAAAAATTATACTGTATATCTATGGC
CPSSR_457	AT	673	8|FCHL5JJBBXX_L2_wHAXPI059581-29_1_(paired)_contig_226790:110-325|+	9|LP150221_R1_(paired)_trimmed_(paired)_contig_125088:756-773|-	10|LP161083-1_R1_(paired)_trimmed_(paired)_contig_108165:799-818|+	N/A	N/A	0.82	0.4	0.98	CATTTCAAAAAAACAATAATTTTTTTTACATGGACACAAAATTAAAAGATAAAAAAATCAAACATTGTGTATCTTTAACATGCTCTGCTTTGGTCTTTGC	TGCAAGAAATGAAGGGTACATCTCTTAATTGAATATGAACCCTTCCCTATAGCATAGTTGAATTGAATATTTAACATTATTGTTGCATCATTATTACGTT
CPSSR_458	AT	674	8|FCHL5JJBBXX_L2_wHAXPI059581-29_1_(paired)_contig_278912:126-341|+	6|LP150221_R1_(paired)_trimmed_(paired)_contig_147625:475-486|+	6|LP161083-1_R1_(paired)_trimmed_(paired)_contig_28538:783-794|+	N/A	N/A	0.94	0.4	0.99	TTTCGAAAAGCAAACTAAAACGGTGGTCATTCTTATCTTTAGAATTTGAGACAATGAATTTTCTTCTAGCACTCTGTGAACTTGTGCTTATGTAAAATGC	TTGTTAGTTTTATAGTTCTATTTTCGTTGCGTTTCTAGTTTAATCTTGTGTAATAATCTCAGGAAATATGAATGTTTGGGAATTGCAGGTGAAAACAGGA
CPSSR_459	AT	675	8|FCHL5JJBBXX_L2_wHAXPI059581-29_1_(paired)_contig_291254:87-302|+	5|LP150221_R1_(paired)_trimmed_(paired)_contig_99253:1485-1494|-	5|LP161083-1_R1_(paired)_trimmed_(paired)_contig_90071:1880-1889|+	N/A	N/A	1.41	0.4	1	CTCTATGGACACCTCAAATGAGAGAATAAAAATGTAGACATTAAGAATCTCTTTCATAAGAAGCTTGGAATGTCAAAATGAGGTTCTAGTGGCCAAGAGA	GAACCCAAAGAGAACTTTCTTGATAGTTAGATTTTTAAAAAGGCAGGAAAATATAATAAAAGGAAGGCATTGGTTATTAGTTAGTGTTTTTTTATTCCAA
CPSSR_460	AT	677	8|FCHL5JJBBXX_L2_wHAXPI059581-29_1_(paired)_contig_314158:61-276|+	7|LP150221_R1_(paired)_trimmed_(paired)_contig_72854:216-229|+	6|LP161083-1_R1_(paired)_trimmed_(paired)_contig_211053:184-195|-	N/A	N/A	0.82	0.4	0.98	GCCATAACCCACCCGAGCCTATAGCGGTCTCACCGGGATTTCACAACCAACAATTCAATTACACAACTCAAATAAATATCCAATTCAATTAAACAACTCA	GCTTAATTCCACTCAATCAATGCCCATCTCAAAATCATATGCCCCAAATATAATCTATTATTTAATTTAGGGTTCAAGGTTTAGATTATACCTTCTCGCG
CPSSR_461	AT	678	8|FCHL5JJBBXX_L2_wHAXPI059581-29_1_(paired)_contig_58920:465-680|+	6|LP150221_R1_(paired)_trimmed_(paired)_contig_234479:256-267|+	N/A	10|FCHL5H3BBXX_L3_wHAXPI062220-17_1_(paired)_contig_90982:424-443|-	N/A	1.63	0.4	0.98	CAGATGTCATTTGTTTCTATTTTCTCCATTTACATAAATGAGAAAGCAAGCACATTTTTCTTACAGGAAATACAATTACAGCACAGTCATTTATATCTGG	GTGCTTTCTACATGCTAGTAAAAGCATGCTAGTGTATATATAATGCAAGAAACAACAGTTTCAATAGGAGGAATACAAAGCAAGTTATATAATCGAAGAT
CPSSR_462	AT	679	8|FCHL5JJBBXX_L2_wHAXPI059581-29_1_(paired)_contig_59655:1486-1701|+	5|LP150221_R1_(paired)_trimmed_(paired)_contig_140723:722-731|+	N/A	5|FCHL5H3BBXX_L3_wHAXPI062220-17_1_(paired)_contig_39618:1644-1653|-	N/A	1.41	0.4	0.99	ATTTCCAAAAATGGTGAGACTACAATCAATTTTCAGTGTGGCCTTTAATCATGTCTTAGGATAATGCTGTTATCCAAAATTTGATAACAAACAATATCAC	AAGAGGAGAAATGCCGAATAACGGTAGTCCTCAATATTCCGAACTTGCTTTGCGCACACGCATAATTCAACCCAGATAAGATTGACTGGCCTGCAAATTT
CPSSR_463	AT	680	8|FCHL5JJBBXX_L2_wHAXPI059581-29_1_(paired)_contig_60286:200-415|+	6|LP150221_R1_(paired)_trimmed_(paired)_contig_114048:945-956|-	N/A	10|FCHL5H3BBXX_L3_wHAXPI062220-17_1_(paired)_contig_152404:812-831|-	N/A	1.63	0.4	1	TTAAAAAGTAAAAGAACAATAAAGGCAGCAATGTAGATGATTAAGGATTTAAGATCTAATTAATAAGGATTCGGACAAGGGTGAAGGGTGTCAGTTTTAA	GAGAGATCAGAAATCCCAATAGAGACCAAAATGAAGCACCACGGTAGGTGATGATTATAATGCTCAAAAGGCATTGATGTCTGTGTCCAGCTCCAGCATG
CPSSR_464	AT	682	9|FCHL5JJBBXX_L2_wHAXPI059581-29_1_(paired)_contig_143566:2-219|+	6|LP150221_R1_(paired)_trimmed_(paired)_contig_116997:804-815|-	7|LP161083-1_R1_(paired)_trimmed_(paired)_contig_177833:275-288|-	4|FCHL5H3BBXX_L3_wHAXPI062220-17_1_(paired)_contig_4532:787-794|+	N/A	1.8	0.2	0.97	CTATATTGTTCAGCTGATTTAGAGTCTTCTTTTTCAATTAGATTATACTCTTTATATTAAATAGGAGCACGCTGTATATTATAAGCATGATGTTAATGTA	CGAGTTGGTGTGTGTGTACAAACACGAAAATACATTATGTATAACTTCCATTTCAGCAAAAAGAAGAGATTTTTTTTATTGTTATTAAACTCATAATATG
CPSSR_465	AT	683	9|FCHL5JJBBXX_L2_wHAXPI059581-29_1_(paired)_contig_231502:34-251|+	4|LP150221_R1_(paired)_trimmed_(paired)_contig_89025:511-518|-	4|LP161083-1_R1_(paired)_trimmed_(paired)_contig_173193:209-216|-	N/A	N/A	2.36	0.4	0.98	GGGCCTGCTTCTTGGGGAGCTGAAGTACCAGTTTAAATGCTTGCAGAAGGTATTAAGAAGGTGAATATTGCTTCAATTTCCATCTTTCTATCTGTGGTTC	ACAACTGTATCTATATGTTCTTTGGGTGGGTTGTGTTTAAAATTTTCAAAATTTCTTTTTATGACTTCTCAACCCTTAAGTTTACTTGCAACTGTGACCT
CPSSR_466	AT	684	9|FCHL5JJBBXX_L2_wHAXPI059581-29_1_(paired)_contig_237198:204-421|+	8|LP150221_R1_(paired)_trimmed_(paired)_contig_74589:122-137|+	8|LP161083-1_R1_(paired)_trimmed_(paired)_contig_50939:1754-1769|-	N/A	7|TCunknown-1_(paired)_contig_63847:1704-1717|-	0.71	0.2	0.98	ATTGGGAGTCCCAGATAGAGGCATGGCAAATACCAATTCTTGAAGACAAAAGGCTTCCGGAATGGTAAAATTCAACCAGTTTGTGTACTAAGAACACACA	GGACAATTTCTGAACAGTGTGTAAAATTCTCCAGGTACCCAATCACTCTCTTCAATGAGCTCTATTATCTTAATGCAGGAGGGACAATCTGGACTGGTAC
CPSSR_467	AT	686	9|FCHL5JJBBXX_L2_wHAXPI059581-29_1_(paired)_contig_52051:413-630|+	6|LP150221_R1_(paired)_trimmed_(paired)_contig_152883:2244-2255|+	6|LP161083-1_R1_(paired)_trimmed_(paired)_contig_213484:193-204|-	7|FCHL5H3BBXX_L3_wHAXPI062220-17_1_(paired)_contig_206219:624-637|-	N/A	1.22	0.2	0.99	ACATGGTTTTATGATTGTTTTTGTGTGTTTATTATTAACGTTATTATTTTGTTGAGAAGTTCCATATGGTAGATTTATCCCATAAATCTTCATGAAAATC	ACATGTACGATATGCTCCCTGAATGTGATTCTTGGGGTAGTCTTGTAGAATAAGTGTACACTCCAATATAAAATTTTGGGTTCAGAGGAAGTGATGCATC
CPSSR_468	AT	687	9|FCHL5JJBBXX_L2_wHAXPI059581-29_1_(paired)_contig_76161:151-368|+	7|LP150221_R1_(paired)_trimmed_(paired)_contig_135047:780-793|-	N/A	9|FCHL5H3BBXX_L3_wHAXPI062220-17_1_(paired)_contig_80733:646-663|+	5|TCunknown-1_(paired)_contig_47029:265-274|+	1.66	0.2	0.98	ACTTCATTTCGAGGAAAAAAATATGAGTACCAGTTAGAAATGAAGATGTGGGTTTGTCACCTTCTTTATTTTCTATATTTTTATAACGTCTTTGGAACTC	ACATACACAGGAAAAAGGTAGACCATTGCCAAAGTTTGGCGAATGGGATGTTAATGATCCAGCATCAGCTGAGGGCTTCACAGTGATCTTCAACAAGGCT
CPSSR_469	ATA	689	5|FCHL5JJBBXX_L2_wHAXPI059581-29_1_(paired)_contig_171570:446-660|+	3|LP150221_R1_(paired)_trimmed_(paired)_contig_93566:1057-1065|-	3|LP161083-1_R1_(paired)_trimmed_(paired)_contig_199359:93-101|-	6|FCHL5H3BBXX_L3_wHAXPI062220-17_1_(paired)_contig_112712:380-397|+	N/A	1.3	0.2	0.94	GTAAGTTAAACATGAAGAGGTTCCATTTCATCACCTGTCTTAGAAGAATTCAATTCAAGAGTTGAAGTGCACTTTGATTGCACCATGCAATGCTCTTTTT	CAGTAATTTTTTTGATAAAAAAAACATATTGATGGTATTGACTTGACTTCCTCATTTTTTTTCATGCATTATTTAAAGGGGTATCATGACAATTTGTAGG
CPSSR_470	ATA	695	6|FCHL5JJBBXX_L2_wHAXPI059581-29_1_(paired)_contig_70882:169-386|+	5|LP150221_R1_(paired)_trimmed_(paired)_contig_203981:342-356|-	5|LP161083-1_R1_(paired)_trimmed_(paired)_contig_72985:610-624|-	5|FCHL5H3BBXX_L3_wHAXPI062220-17_1_(paired)_contig_252795:214-228|-	N/A	0.43	0.2	0.99	AGTTGCCCCATTTTTGCGAAGGTCCTTGTTGATGCTTTGCTATGTATTGCTTGTGAGCCCATTCCTGAATACAAATCGCACACAATAATATTCAATATTC	ATGACAATAACAAAAGTAAAAACAATATAAGAGGATATATTGACAAATTTATGCAAAACATCTGTTCCACTATTTTCCTCAAGTTTGCTGAACTCATGTG
CPSSR_471	ATAA	697	5|FCHL5JJBBXX_L2_wHAXPI059581-29_1_(paired)_contig_105737:715-934|+	6|LP150221_R1_(paired)_trimmed_(paired)_contig_4349:2235-2258|-	6|LP161083-1_R1_(paired)_trimmed_(paired)_contig_152508:239-262|+	N/A	N/A	0.47	0.4	1	CTTCAGATATCACAAGTAAACAATTGGTTTGCTATCAATTGTGCTCATCCTTTGCATAAAAAAACTTTGGCTGAAGTTCCACCTTTGCAAACCTCATTAT	ACTTCAAATAACAAAAGAAGAGTAAACGTACAGTATCCCAAATTTGCAACTTTATTGGTTTGTTATCAATTGTGATCATCCTGGCCCCAAATTCAACACC
CPSSR_472	ATAC	698	5|FCHL5JJBBXX_L2_wHAXPI059581-29_1_(paired)_contig_39057:1628-1847|+	5|LP150221_R1_(paired)_trimmed_(paired)_contig_154766:2379-2398|-	5|LP161083-1_R1_(paired)_trimmed_(paired)_contig_275380:143-162|+	6|FCHL5H3BBXX_L3_wHAXPI062220-17_1_(paired)_contig_122819:1445-1468|+	7|TCunknown-1_(paired)_contig_41015:363-390|-	0.8	0	1	TGACGATCATACGACGGCGTTTGTGGTGTATCATCTTCCTGATTTCGTCAATGTATATGCCTTTTCCAACCTGAATCAGCCGATCGATACACACATCAGT	AAACACATATATCTAGAGAGAGAAAGAGAGGAGAGAGAGGAGCATACATCTTGATCCAAGAACTCGAGAAAATCACGCTTGCGAGCTGCCCTAGCTTCTT
CPSSR_473	ATAC	699	6|FCHL5JJBBXX_L2_wHAXPI059581-29_1_(paired)_contig_70874:447-670|+	4|LP150221_R1_(paired)_trimmed_(paired)_contig_22680:509-524|+	4|LP161083-1_R1_(paired)_trimmed_(paired)_contig_12814:532-547|+	N/A	N/A	0.94	0.4	0.99	TCGGGTATGAACATTTGAGGAACGTTTTTTTGGTTCGTGACGACATTTATTTTGCTGGGAAGGCTCTCGTCGGTGGTGTCTCCGGCGCAATTGCTCAGGT	ATATACATACATTTACGCGTTTAGTCTCGGATATGTGCAGTTTATTGGATTATTATGTGTGTTGATTGAATGTTTATCAATTTGGGCATTTGCATACTAA
CPSSR_474	ATAG	700	5|FCHL5JJBBXX_L2_wHAXPI059581-29_1_(paired)_contig_275089:254-473|+	5|LP150221_R1_(paired)_trimmed_(paired)_contig_46993:1842-1861|+	6|LP161083-1_R1_(paired)_trimmed_(paired)_contig_56768:128-151|-	7|FCHL5H3BBXX_L3_wHAXPI062220-17_1_(paired)_contig_287667:265-292|+	N/A	0.83	0.2	0.99	CCAGTGAATTAGAAAAATATAATTAATGAGGTTGCCACAACTTATGGTTCTTTTGGAAAAGAAGGATAGCTATTCCACGTGGCGTACTCTCTATTAGATA	ATAATGGAGAATCTAGGGGAATGACAAATTTTCGTGTAACAACTTAAACTACGAGTCTTATAAAGTTAGGGATGTTTAAGACAATTTATATCCATATAGT
CPSSR_475	ATATAC	702	5|FCHL5JJBBXX_L2_wHAXPI059581-29_1_(paired)_contig_204751:51-280|+	N/A	5|LP161083-1_R1_(paired)_trimmed_(paired)_contig_99249:170-199|-	3|FCHL5H3BBXX_L3_wHAXPI062220-17_1_(paired)_contig_166174:283-300|-	N/A	0.94	0.4	0.98	AGAAACACGGGTTTCATGTGGCATGCAATTGAAACATGGTCCACTTAAGAGCTTTATTAGACTTTTAACACTTGGCCTTGAAGTAACCTTCTCTAGATAT	ATATAAAGTGTTGTAATCCTGGGGAAAGGAGTGAAGCTGAAGAAACTATTATTGGGGGTGGAGAGCTACCAACTCTAACATGGGGAGTGATTCTACAAAT
CPSSR_476	ATATAC	703	6|FCHL5JJBBXX_L2_wHAXPI059581-29_1_(paired)_contig_206318:77-312|+	7|LP150221_R1_(paired)_trimmed_(paired)_contig_17140:2696-2737|+	5|LP161083-1_R1_(paired)_trimmed_(paired)_contig_81209:1849-1878|+	N/A	N/A	0.82	0.4	0.99	TAAAATAAAAACAAAACAAAAAAAACAAATGATACTTTACACTATCAAAACACATAGATCCATAGCTAGTTAAGAGTTAGGATTTAGAAATGACAACTAT	ATATAGAATGAAGGAAATACCAGGAGTCTTGACGACACGGTTCTGGTTGGATTTGGTAGCATAGCTATGGCGCTTCCGATACGTGAGACGCTGCACCATT
CPSSR_477	ATC	704	5|FCHL5JJBBXX_L2_wHAXPI059581-29_1_(paired)_contig_102453:138-352|+	5|LP150221_R1_(paired)_trimmed_(paired)_contig_22117:277-291|+	5|LP161083-1_R1_(paired)_trimmed_(paired)_contig_235795:1410-1424|-	8|FCHL5H3BBXX_L3_wHAXPI062220-17_1_(paired)_contig_191194:1385-1408|+	7|TCunknown-1_(paired)_contig_46678:712-732|+	1.26	0	1	CGAAACCCGTATCTTCAATCTCCTTCAAATCCCTTCCACACTCACCCTTCACCAAACCATCATCATCAAGCTTCAAGCTTTGTTCAATTAGAGCTTCCCA	AAGCTCTCTTCCTCAAAACGCAAAAAGCCCTAAACCCATATTCTCAGAAACCCTAAACCCCTTCCCTTATTCGCTCATCAAAACCTCATGCGTCGCCGTC
CPSSR_478	ATC	705	5|FCHL5JJBBXX_L2_wHAXPI059581-29_1_(paired)_contig_118721:476-690|+	N/A	5|LP161083-1_R1_(paired)_trimmed_(paired)_contig_239128:500-514|+	4|FCHL5H3BBXX_L3_wHAXPI062220-17_1_(paired)_contig_29375:486-497|-	5|TCunknown-1_(paired)_contig_2783:2075-2089|+	0.43	0.2	0.99	CCCAAAACATGAGGATGCTTATCATAGCAGTTCTCAACACCTGATTGCAGTTGACATTCATGTCAACATCCGTTTGCTTTGGGGGGTGGGCCAAGGGCAG	ACTTGTATATACAATCGGCTCTAATTTTTTGGTCTCGTCCTTCGCATGAGGGTGCAGTATATTGCAGTTGCTGATGATTGCACATGTTCTGCATGTGCAT
CPSSR_479	ATC	708	5|FCHL5JJBBXX_L2_wHAXPI059581-29_1_(paired)_contig_267901:95-309|+	6|LP150221_R1_(paired)_trimmed_(paired)_contig_11832:793-810|-	6|LP161083-1_R1_(paired)_trimmed_(paired)_contig_10309:235-252|-	N/A	N/A	0.47	0.4	1	AGTAACAAATTGTGAATTACTTGTATTTTTTTGCAGTCAGGGAGAATGTATTACCTAAACAGAAGGACATTGAGAAAGAGCTGGGAGTGGCCTAATAAGG	AACATAACAATAACCATAAGCTAGACCTTGAACTCAACATCTCACCACTTTCATCATCAACTTATTCCGAAGATCACCGCCGATCAAATTGCTCGAAATT
CPSSR_480	ATC	709	5|FCHL5JJBBXX_L2_wHAXPI059581-29_1_(paired)_contig_292622:128-342|+	6|LP150221_R1_(paired)_trimmed_(paired)_contig_127313:1545-1562|-	N/A	6|FCHL5H3BBXX_L3_wHAXPI062220-17_1_(paired)_contig_145864:1621-1638|+	N/A	0.47	0.4	0.97	CAATACTTCAGAGAAGCATTAACAAGTACTACAACCATAGAGAAAAAGTTACCAACTACTACTACTAACAGAGAAACAATTACCAGTAATTACCATCAGG	AAAGTATTATTGGAGATCAATCATCATCTCAAACAGTACTTGAACTCTTTCCGCTTCGGAGCAGCGATGATCATCATCGTAACGGCATTAATTATGTTAG
CPSSR_481	ATC	711	5|FCHL5JJBBXX_L2_wHAXPI059581-29_1_(paired)_contig_69683:778-992|+	6|LP150221_R1_(paired)_trimmed_(paired)_contig_102965:2788-2805|+	6|LP161083-1_R1_(paired)_trimmed_(paired)_contig_224030:191-208|-	5|FCHL5H3BBXX_L3_wHAXPI062220-17_1_(paired)_contig_174883:1109-1123|-	5|TCunknown-1_(paired)_contig_120:1741-1755|-	0.49	0	0.99	TTCTCTGCAAAAGACTGGTCCATAATGTGAAATTAGTGAGAAATCCAACACAAAATCAAATGGGGTTTCTTCCAAGTAGATTATCATCTACCAAATCCTT	AATAGCAGCAGCTGTAAGAAATGAACAAGAACAATCATTCACAGTAACTTACCTCATGAACTCATGTGGGTTGTCCTTAGAAAATGCTATTACTGCTTCC
CPSSR_482	ATC	712	6|FCHL5JJBBXX_L2_wHAXPI059581-29_1_(paired)_contig_119513:276-493|+	5|LP150221_R1_(paired)_trimmed_(paired)_contig_99786:5110-5124|+	5|LP161083-1_R1_(paired)_trimmed_(paired)_contig_103671:246-260|-	5|FCHL5H3BBXX_L3_wHAXPI062220-17_1_(paired)_contig_311545:355-369|-	N/A	0.43	0.2	0.99	ATTCTTCTTCACCAACACTCATCTTCTCTCTATCAAGTAACATCTCCACATAATCATCATCTGAAACAACAACAGTGTAACTTCCCAAGTTCATGGAGAT	CTCCACTACTACTACTACATCTTCTTCATCTAAACAAGTTCTTGATTCTTGACAGAGTAGACTAGAGAGAGTAAATGAAGAGTGAGAATCATCCGCCATA
CPSSR_483	ATC	714	6|FCHL5JJBBXX_L2_wHAXPI059581-29_1_(paired)_contig_140810:86-303|+	5|LP150221_R1_(paired)_trimmed_(paired)_contig_32881:764-778|-	5|LP161083-1_R1_(paired)_trimmed_(paired)_contig_168572:441-455|-	6|FCHL5H3BBXX_L3_wHAXPI062220-17_1_(paired)_contig_278850:582-599|-	6|TCunknown-1_(paired)_contig_59325:444-461|+	0.49	0	0.99	TTAAACGAAAGATGCCCCAATCTTTACAAGCTGCACCAAGATGGTCTGGGTTTATGCGTTGGAGGTCTATCTGAGGGATAGGATGGTTCCATTTGATGGA	CGGTTCAACCGGGTTTTTTGGCTGGCGAAACAGAGGAGGGTAAGATTCAATGTTTGCAATGGTTTTTGATTCAGACATGTTCATCTTCTTCTTCATTTGT
CPSSR_484	ATC	716	6|FCHL5JJBBXX_L2_wHAXPI059581-29_1_(paired)_contig_76013:389-606|+	4|LP150221_R1_(paired)_trimmed_(paired)_contig_95384:2348-2359|+	7|LP161083-1_R1_(paired)_trimmed_(paired)_contig_229695:783-803|-	5|FCHL5H3BBXX_L3_wHAXPI062220-17_1_(paired)_contig_90520:724-738|-	N/A	1.12	0.2	0.99	CCAAAAATGGTATCAGTATCACCACAGAGAGATTATGGGTGGGAATTTTTTAATCCATTTGCTGGAGTGAAAAAAGAGGAGGTGATAAATAATGGGTTTA	AAAGCAGCTCTGATGATGAATTGAAGGAAATTAGAGAGAGGGAAGGGATTCCAGAGCTGGAAGAGGATGTGGAGAGAGAGGGAGGAGAGAGAAATGATGA
CPSSR_485	ATC	717	6|FCHL5JJBBXX_L2_wHAXPI059581-29_1_(paired)_contig_80884:95-312|+	8|LP150221_R1_(paired)_trimmed_(paired)_contig_88892:111-134|-	7|LP161083-1_R1_(paired)_trimmed_(paired)_contig_142434:148-168|+	N/A	7|TCunknown-1_(paired)_contig_5392:936-956|-	0.71	0.2	0.99	CTGAGAAAGCAAATTTCAATTGAAACCAGAAAACTAAGAAGAGTGTGTAAATGGCTTTTCTTCTACCCAATCTATATCCATCTATTCATCTCCAAATCAA	TAAAGAAAAACCCATTCACCAGACAGTTTCTCTAGCAAAACCCAATGCTCTCTCTCCTCCTCTTCCTCTCTCTCCTCTCACCAGCCTCCAAAACCCACCA
CPSSR_486	ATC	718	6|FCHL5JJBBXX_L2_wHAXPI059581-29_1_(paired)_contig_97367:1181-1398|+	5|LP150221_R1_(paired)_trimmed_(paired)_contig_73238:4946-4960|-	N/A	N/A	4|TCunknown-1_(paired)_contig_71267:183-194|+	0.82	0.4	0.99	ACCCACCAACCACACCCAAAAGCAAGAGCCCAGCTAAAATTGTACCCTTAACAGCACCCCCATCTTGTTCTTCATCATCATCATCTCCTTTGCTGCGCTT	ACCATCATCCTCACTCTTGGGATTCAAGAACCAACTGAGACTTTTTGGGGCATTGGAAGGAGAAGAAATCTTTTGGTTTTGGAGGGTCTGTTTGTTGTTG
CPSSR_487	ATC	719	7|FCHL5JJBBXX_L2_wHAXPI059581-29_1_(paired)_contig_103476:64-284|+	5|LP150221_R1_(paired)_trimmed_(paired)_contig_126016:334-348|-	6|LP161083-1_R1_(paired)_trimmed_(paired)_contig_97381:397-414|-	N/A	N/A	0.82	0.4	0.99	AAAAATAGGTATATTCCCCTTCTCCGTATAATTTGCATCAATCAAGAATCAAGTTTTGAACATCACTAGATGAGTAAACTATTCACTATTCAGTGACACT	AATAAACAAGTTAGTGTGGATAATCTCATCCACTCAACTTGATTTTCCTAATTTATGTGGTTTAATGCATCAATGTCCAACTTTCATAGTGAATTCGTAC
CPSSR_488	ATC	720	7|FCHL5JJBBXX_L2_wHAXPI059581-29_1_(paired)_contig_127411:525-745|+	N/A	N/A	7|FCHL5H3BBXX_L3_wHAXPI062220-17_1_(paired)_contig_337239:164-184|+	6|TCunknown-1_(paired)_contig_34115:563-580|-	0.47	0.4	0.98	ATGGGTTTTCATTGTAGGTGTTGGAGAAGAATGATCTGACAGTATCACTGAGGTATCCGAGCATGTCATCTCTGCAAACCCACTTCAACAACCACCATGG	AAGACCCAGCAGCAGCAGCTACAGAACAACAACCAACTTGAGAATGATCATCCCTGCTCTCGACGAGAAGTACGTAATGAGTTCGTCCTTCGCCGGAGAT
CPSSR_489	ATC	721	7|FCHL5JJBBXX_L2_wHAXPI059581-29_1_(paired)_contig_267022:80-300|+	6|LP150221_R1_(paired)_trimmed_(paired)_contig_156585:742-759|+	6|LP161083-1_R1_(paired)_trimmed_(paired)_contig_106258:557-574|+	6|FCHL5H3BBXX_L3_wHAXPI062220-17_1_(paired)_contig_45113:1009-1026|-	5|TCunknown-1_(paired)_contig_110585:581-595|+	0.63	0	1	CTGAATGATCATCATAAACCTTCTTTTTGGTTGAATGAGGAAAGATCTTCCTCATGTGTGTCCACAATGACATGGCATGCGCCGCCTCAGCACGATCACT	ATTGTTATGGTTGTGATGATGATAGTGGCGGTGATGGTGAAACACAAGTCCTAGCTTGTTTTTCAATCTCCTCAGCCGTCCGGTCTGCTTCTCCGGGTTC
CPSSR_490	ATC	722	8|FCHL5JJBBXX_L2_wHAXPI059581-29_1_(paired)_contig_150639:319-542|+	7|LP150221_R1_(paired)_trimmed_(paired)_contig_186249:407-427|-	7|LP161083-1_R1_(paired)_trimmed_(paired)_contig_87980:773-793|-	7|FCHL5H3BBXX_L3_wHAXPI062220-17_1_(paired)_contig_74503:417-437|+	5|TCunknown-1_(paired)_contig_129129:951-965|+	0.98	0	1	TACCCAATTCCTTCAAACTGAAAAGTCCATCAACATCAGAAAGCATCTGATTCTTTGTCACCTCATCATAATCTCCTTCTTCTCTCTTTTCTTCGGTTTT	AGTGCATCCATCCATAGCATAATCCGATCTGATTCGATCCAAATTATCGCCTTCATTGATGTTATCACCTTCCCCTGCTTCTGTCATCGATTTTTCTTTC
CPSSR_491	ATC	723	8|FCHL5JJBBXX_L2_wHAXPI059581-29_1_(paired)_contig_281478:142-365|+	8|LP150221_R1_(paired)_trimmed_(paired)_contig_73550:337-360|-	N/A	6|FCHL5H3BBXX_L3_wHAXPI062220-17_1_(paired)_contig_59202:291-308|+	N/A	0.94	0.4	0.99	ATAATAATACCAACAACAAGTTTGATCTCAAACTCTGCATCTCAAAACCCTAAGATCCATCATGCCCAAGATCTAAACCTAGCTTACCCATCATCAACTG	AACAAGATTACAACAGTACTAATCTCTCCAAGTTCATTGAATTAGTACCACCTAACAACCCTTCCTCCACCACTAGTAATTCATCTCATTTTTCATCCAT
CPSSR_492	ATC	725	8|FCHL5JJBBXX_L2_wHAXPI059581-29_1_(paired)_contig_75891:213-436|+	6|LP150221_R1_(paired)_trimmed_(paired)_contig_199657:230-247|-	6|LP161083-1_R1_(paired)_trimmed_(paired)_contig_225413:110-127|+	N/A	N/A	0.94	0.4	0.99	TGAATATATAGAGATTGTGTTTTTCAATTTTTTTTGGATTCTGGGGGTCTTGTAATGCTGTCCCTTTAAATTCTGCATGTAACAAATAGTTCAATGGCAG	ATAAGAATGGTACATGAAGGAGAAGAACAAGAGTGCAGTAACAAGCAAATGTGTACAAAAAAGGTGGTCAAGTCACAGAAAGTTCCACAGAGAGGACCTG
CPSSR_493	ATCAA	727	5|FCHL5JJBBXX_L2_wHAXPI059581-29_1_(paired)_contig_171466:791-1015|+	3|LP150221_R1_(paired)_trimmed_(paired)_contig_226190:671-685|+	N/A	3|FCHL5H3BBXX_L3_wHAXPI062220-17_1_(paired)_contig_179617:326-340|-	N/A	0.94	0.4	0.98	ATAAATATACAACACTAATTCAAGTCCTAACACCTAAATATGCACCAAACTCAACAGACACATGCAATTATATCAAGAACTCAACAAATTAAGCAAACCC	GTAAACCCAAAACCCCATGACAGACAACTTCAAACCCAAATTCTGTGCATTGCAAAAAGTGAAATTTCATGCACAATAATTCAACCCAATGCATTCTAGT
CPSSR_494	ATG	729	5|FCHL5JJBBXX_L2_wHAXPI059581-29_1_(paired)_contig_119584:50-264|+	N/A	N/A	4|FCHL5H3BBXX_L3_wHAXPI062220-17_1_(paired)_contig_89023:639-650|+	4|TCunknown-1_(paired)_contig_2221:3577-3588|-	0.47	0.4	0.99	TAGATCTTTCATAGCAAATTGGAGACTCATTGTTCTTATCACTGCTTGTATTCTGTTCTTGTCATTGCCTATGATGAGCATATCATCCACATATACTAGA	CTGTTTTGATTCTTGGAAACAAACAGAGATGGATCTGACTTGCTTGCTTGAAACCCCAATTGTTCTAGGCAGTGAGATAGTGTAGCAAACCATGCTCTAG
CPSSR_495	ATG	730	5|FCHL5JJBBXX_L2_wHAXPI059581-29_1_(paired)_contig_223928:2-216|+	4|LP150221_R1_(paired)_trimmed_(paired)_contig_53498:196-207|+	4|LP161083-1_R1_(paired)_trimmed_(paired)_contig_125552:548-559|+	N/A	4|TCunknown-1_(paired)_contig_83894:416-427|+	0.43	0.2	0.98	AAGCAATGTTACGTTCTAGAAGAAATTAAACTTCCGGGGAAAAAAAAGTGCTCAAGACAACAAATTTAACACCTTGCTCAATAATGACGAGGATTATAAT	ATAAATTAAAACTATTGGACCTTGCTCGAAAATTTCCTATCACGGATCTACTGCAATCTATTTATAACTTAGATATTGCACATCATCAATCTGAGCACCC
CPSSR_496	ATG	731	5|FCHL5JJBBXX_L2_wHAXPI059581-29_1_(paired)_contig_235703:754-968|+	5|LP150221_R1_(paired)_trimmed_(paired)_contig_46101:833-847|-	5|LP161083-1_R1_(paired)_trimmed_(paired)_contig_22712:331-345|-	5|FCHL5H3BBXX_L3_wHAXPI062220-17_1_(paired)_contig_107519:1062-1076|-	6|TCunknown-1_(paired)_contig_7131:1390-1407|-	0.4	0	1	ACCTGTCAATGAATGCTCCATCTGATGCTATAAATATTAAGGAATGACATGTATGTATATATAGACAGAACACTAGATAACATGTGAGAGCTGAATATTC	TTATGTTGTTGCTGAGTATTTGTTTCTGATGTGTTTGAAATGTTCAGCTCTTATATTCATTTGTTTGGAATTTTATAGGGTTTCTTTTGGTTTATATAGG
CPSSR_497	ATG	733	5|FCHL5JJBBXX_L2_wHAXPI059581-29_1_(paired)_contig_249434:62-276|+	2|LP150221_R1_(paired)_trimmed_(paired)_contig_114600:1296-1301|-	2|LP161083-1_R1_(paired)_trimmed_(paired)_contig_154867:1121-1126|-	2|FCHL5H3BBXX_L3_wHAXPI062220-17_1_(paired)_contig_306346:406-411|+	5|TCunknown-1_(paired)_contig_68172:1037-1051|+	1.47	0	0.96	CCATTGACCATCTATCTATCTTCGCATGGGTAAGTCTTGAACCTTTTTGAGGATTAGGAGGTGTCCAACCACATAGCTGAAGCTCGTAGAAATATTTTGA	CGAAGACTAGTGTTTTCTTAATGTCAAGTCACTTAATTCTGCACCAACTCTTGCATCCTACCAAAGACCTTGGAATCTAGTGACATGTATTTCCATTCTG
CPSSR_498	ATG	734	5|FCHL5JJBBXX_L2_wHAXPI059581-29_1_(paired)_contig_25410:509-723|+	6|LP150221_R1_(paired)_trimmed_(paired)_contig_57699:1920-1937|-	N/A	6|FCHL5H3BBXX_L3_wHAXPI062220-17_1_(paired)_contig_164296:327-344|+	6|TCunknown-1_(paired)_contig_18072:921-938|-	0.43	0.2	0.98	AGTAACAATGGCCAAAAGCAAGCTATGATCAAGGGCCTTGAGGCTTTGAAGAACAAGCAGAAGTTCCCTATATTCATCTCTGAAGATGATGATGACTGTT	ATTATTATGAAGATGAGGATGAAGAGGCAGAGCTACAATTTATTAGAGACAAAGCAAACCATATTAATCTACTCAGGCAACAAGCTGCAATGGCTGCTGC
CPSSR_499	ATG	735	5|FCHL5JJBBXX_L2_wHAXPI059581-29_1_(paired)_contig_262080:457-671|+	4|LP150221_R1_(paired)_trimmed_(paired)_contig_57989:818-829|+	4|LP161083-1_R1_(paired)_trimmed_(paired)_contig_82231:521-532|-	N/A	N/A	0.47	0.4	0.99	CAAACAATATTCCATTCTTCATCTTCAACATCATCACCAGCTTTTCCTTTCACATTAAACATGATGAATTCTCCGTATAGTACTTTGACTGAAACTCATT	ATAAAAAAACAAATGGGTTCTTGGGGTTGATGAATGAGATGACGAAGACTATGGCGCCGCAAGTTCCTAGGTCATCTAGTTCTGAGTTTGGCAACAACAT
CPSSR_500	ATG	736	5|FCHL5JJBBXX_L2_wHAXPI059581-29_1_(paired)_contig_271246:362-576|+	N/A	14|LP161083-1_R1_(paired)_trimmed_(paired)_contig_253978:307-348|-	6|FCHL5H3BBXX_L3_wHAXPI062220-17_1_(paired)_contig_34676:171-188|+	N/A	4.03	0.4	0.99	CAAATGGTACATGTTGTTGTTGGTACATGCCTGTACTATTACTCATCATCATCATGGCCCTTTGGTGTTGGTGCTGATGATCATCATTATTAGTAGTATC	ATCATCATCGTCATAGTGGATCATTAATTGATGTTGTGGATCTTCAAGACCATTGTTGTTGAACCTGGAGATTGGTGGTATGTTTACATTGATTCTATCA
CPSSR_501	ATG	737	5|FCHL5JJBBXX_L2_wHAXPI059581-29_1_(paired)_contig_304409:122-336|+	N/A	N/A	6|FCHL5H3BBXX_L3_wHAXPI062220-17_1_(paired)_contig_122814:991-1008|-	5|TCunknown-1_(paired)_contig_3141:826-840|+	0.47	0.4	0.99	CACCAAGCCTCTGGATTTTTACATGCCAAAAAATTACATGTTGGATCAAAGCCATCAGACACGTCCGTTCGACATAAACTCTAGTACTACGAGTCCAACA	AGCGATGATTATTGTCTTGGAAGCTCGTCTAGTACTAATCCACAGTACACTCCATTGAAGCCCTTGATGTATTATGATCCAACGCGTGACTTGCTAGAGA
CPSSR_502	ATG	739	5|FCHL5JJBBXX_L2_wHAXPI059581-29_1_(paired)_contig_80872:112-326|+	4|LP150221_R1_(paired)_trimmed_(paired)_contig_20241:1931-1942|-	N/A	5|FCHL5H3BBXX_L3_wHAXPI062220-17_1_(paired)_contig_152448:158-172|+	N/A	0.47	0.4	0.98	CACTTGTGAGGATTCTTCAATTTATGGGCACATATAGAAAACCATGCCCTTTCTCTTGTTGTTATAATGATGATCTTAATGACTGTGGTTATCAATTATC	CTAAAACTTGAGAATAGTTTCTTCAATCTTTATTATTTCTCAAATCAAATGATTTTCTCATAGCATCTTGTTTTCTTTCAGAGATCAGGGTATGAAGTTT
CPSSR_503	ATG	740	5|FCHL5JJBBXX_L2_wHAXPI059581-29_1_(paired)_contig_81597:333-547|+	6|LP150221_R1_(paired)_trimmed_(paired)_contig_79908:369-386|+	N/A	5|FCHL5H3BBXX_L3_wHAXPI062220-17_1_(paired)_contig_123376:163-177|-	N/A	0.47	0.4	1	GACGTGCCTGTGTTGGAGTTACCGGAGACGGGGATGGTGATGGAGGGAGCGACACTTGCCGTGGTCAAAGCCGTTGATAATGATAGCCGGCCGGTGAATT	GTGATTGGTTGGAACGTGCTTTTGATGGGGATAAGGAAGAGGAGGCACTGAATGAAGCTGTGAGAGAGATGATGAAGACGGAGCCAACATTTACTCATGT
CPSSR_504	ATG	741	5|FCHL5JJBBXX_L2_wHAXPI059581-29_1_(paired)_contig_87313:708-922|+	N/A	N/A	5|FCHL5H3BBXX_L3_wHAXPI062220-17_1_(paired)_contig_23330:330-344|-	4|TCunknown-1_(paired)_contig_137426:136-147|+	0.47	0.4	0.97	TAGTCAAATAAATTAACTTTTGCCTTATACAAATGAATAAATGTAACACATTCACAGCAGCAACTAAAAATTGCATCGAATAAGTACTAAAGAAAAGGGA	GGGAGTACTCACATGCTGCCATTTCAATCGGAGAAGGAAGATTATTGGTTGCGCCGTTTCATAGACCTACAAGATTAATGGTTGCCGTCGGGGAGGAGGG
CPSSR_505	ATG	742	6|FCHL5JJBBXX_L2_wHAXPI059581-29_1_(paired)_contig_146820:729-946|+	N/A	N/A	7|FCHL5H3BBXX_L3_wHAXPI062220-17_1_(paired)_contig_126873:582-602|-	7|TCunknown-1_(paired)_contig_13716:474-494|+	0.47	0.4	0.98	TGGTATGCTGCTGTCCTTGAAGAAGCTAATCTCTCATTATTGTGCCCTGTTCCGTCTCCTCCATGGCTCACAATCCCTAAATCTCGATCTGAATCAGATA	GAGAAAAGGAGAAAAAGGACTTGGTGTCGGCACGGTTTTTCAATCCTAGAAACAATAAAGTTTACTATTTTCAGGACGAGGAGATGAAGAGATGGCTTCC
CPSSR_506	ATG	743	6|FCHL5JJBBXX_L2_wHAXPI059581-29_1_(paired)_contig_75606:395-612|+	5|LP150221_R1_(paired)_trimmed_(paired)_contig_117541:202-216|+	N/A	5|FCHL5H3BBXX_L3_wHAXPI062220-17_1_(paired)_contig_63606:1337-1351|+	5|TCunknown-1_(paired)_contig_13122:1099-1113|+	0.43	0.2	0.99	AAAGGAAAAGGAGAAGAGGATGGTGAGAGCAAGGAAGAATATGAAGTAGAGTTTCGTAATTCATCTGATTTTGAAGTTGAGGATACAAGTAATGATGAGT	AGGAGGAGGACAGTGAAGATGAAAGTCAGATTGGTACTCGAAAGAACTATGCAGTCAGTAGAGGAAGAAAAACTAATAAGACAAATTTGCGGGTTAAGGG
CPSSR_507	ATG	744	6|FCHL5JJBBXX_L2_wHAXPI059581-29_1_(paired)_contig_8456:2582-2799|+	6|LP150221_R1_(paired)_trimmed_(paired)_contig_63646:148-165|-	6|LP161083-1_R1_(paired)_trimmed_(paired)_contig_20892:891-908|+	5|FCHL5H3BBXX_L3_wHAXPI062220-17_1_(paired)_contig_164779:104-118|+	6|TCunknown-1_(paired)_contig_108872:103-120|-	0.4	0	0.99	AACTTGAACAGAGCAGATTTTTATTCTTCTTCATTCCAGCACTACAAGCAAGTTTTTATACATGGGAGTACATCCAATAAGAAGCTCACACATGTGCACA	ATTCCTTGTTTGGTTATAGTCACACTGTCAAAATTATGGAATTGTTGAGAGGGATGAGAGATGATGAGAGAGGTGAACTGGGTTTGCTCTCATGGTTCGT
CPSSR_508	ATG	745	6|FCHL5JJBBXX_L2_wHAXPI059581-29_1_(paired)_contig_85607:6-223|+	5|LP150221_R1_(paired)_trimmed_(paired)_contig_63676:1752-1766|-	5|LP161083-1_R1_(paired)_trimmed_(paired)_contig_178241:367-381|+	6|FCHL5H3BBXX_L3_wHAXPI062220-17_1_(paired)_contig_294134:172-189|+	N/A	0.5	0.2	0.98	ACGAAGAAGACATGGACGAAATTGTATCGAATTCCGTTTCAATGTGAAAGGGTGGTAGGATTCTTGAGGAGTGGTGAAGTTCTCGTGTTATCATTTGGGA	GAAGTGCTAGATTGGAATTATATGATCCAAGTACTCAAAAACTCAAGAATTTGCAGGTTTATGATCGCGTAATTATTAGTTACCAAATGATTGATTATGT
CPSSR_509	ATG	746	7|FCHL5JJBBXX_L2_wHAXPI059581-29_1_(paired)_contig_180279:196-416|+	5|LP150221_R1_(paired)_trimmed_(paired)_contig_227224:377-391|-	5|LP161083-1_R1_(paired)_trimmed_(paired)_contig_27020:648-662|+	8|FCHL5H3BBXX_L3_wHAXPI062220-17_1_(paired)_contig_122029:369-392|+	N/A	1.3	0.2	0.96	ACCCGGATTGGTCTTCGATGCCGCAAAACATGTTGGTGAAGTTCTCTTCCTTGACATTTTGATGCTGATGATGATGATCAATTTTCTGGTGGGATTGGAA	ATCAGTAGTAGGAGTAGGTCTTGAGGATGATGAATTTTGAAAGAGTTGGGTCACAGCCACACCAATAGGAGGAGGTCTGGGAGTTGGAGTTGTTGTTGTT
CPSSR_510	ATG	747	7|FCHL5JJBBXX_L2_wHAXPI059581-29_1_(paired)_contig_227219:28-248|+	N/A	N/A	7|FCHL5H3BBXX_L3_wHAXPI062220-17_1_(paired)_contig_112110:230-250|-	6|TCunknown-1_(paired)_contig_72724:505-522|+	0.47	0.4	0.97	ATTGCGAAGAAAAGTATTACTAGGATTTAAGAGAGAGACAGAAACAACGAAGACCCACAAGCAGAAAAAACAACAACGATAACAAAAAAAGGGGAAAAAA	ACGATGAACCAGTTGATGAAACAATCGATTTTGAATCGTTACGTTCGGTGTTTCTAGAAAATGGGTGTTGGTGGTGGATCAATCACCGTCTTCTCAACCA
CPSSR_511	ATG	748	7|FCHL5JJBBXX_L2_wHAXPI059581-29_1_(paired)_contig_84394:639-859|+	6|LP150221_R1_(paired)_trimmed_(paired)_contig_7009:2683-2700|-	6|LP161083-1_R1_(paired)_trimmed_(paired)_contig_6938:4637-4654|+	N/A	N/A	0.47	0.4	0.99	TGCTGCGCCAGTGGTTGCAACTGAGATGGCCAAGGAAGAGTAGTGTATAGTATTGCGGGCAACAAGGTGGTGGTAAGAGTAAGAAGACCCGGTGAATGTT	ACGACGATGATAAATGTGAAGATTTGTGTTTTATGTTGTACTACTAGCATCTGTTCATCATCATGCCCCCTATTGAATTTGAGGATTTTGCATGAAAGCA
CPSSR_512	ATT	749	5|FCHL5JJBBXX_L2_wHAXPI059581-29_1_(paired)_contig_109984:228-442|+	N/A	5|LP161083-1_R1_(paired)_trimmed_(paired)_contig_280043:215-229|-	4|FCHL5H3BBXX_L3_wHAXPI062220-17_1_(paired)_contig_100512:297-308|+	N/A	0.47	0.4	0.99	TTTCGGGCTTTTCGCCATGAAGACCGGAGAAGAGCTCTGCAGGTTGGTTAATTTGGTTACACATGACATGGCCTAAAACTTGTTGCATAGACGAAGCAAC	CTGAGGCATGTTTGGGATAGTAGGAATATGAAAGTGGCTTTGTGGCGGCCTAACTAGCTGTGATGATGAATTAGGAGTAGTAATATGAGTGAGATCCAAT
CPSSR_513	ATT	750	5|FCHL5JJBBXX_L2_wHAXPI059581-29_1_(paired)_contig_213441:89-303|+	5|LP150221_R1_(paired)_trimmed_(paired)_contig_50853:618-632|+	N/A	6|FCHL5H3BBXX_L3_wHAXPI062220-17_1_(paired)_contig_17536:964-981|-	N/A	0.47	0.4	1	TGGTAAATGCTTTAAATAGTATTTTATATAAGAAATCTTTTTCGGGAGAAAACCGGGCCCAGAGATCACACTTTAGACAAAATATCTAATTATACCAATC	ATCATTAATTCATATTATTACTAGTTTACTACTACCAATCTACTACAGCTACTATTATTAGTGAAAAAAGAGGGAATGAGCTTAAATCAAGAATTTGGAA
CPSSR_514	ATT	751	5|FCHL5JJBBXX_L2_wHAXPI059581-29_1_(paired)_contig_239995:52-266|+	N/A	N/A	4|FCHL5H3BBXX_L3_wHAXPI062220-17_1_(paired)_contig_290685:161-172|-	4|TCunknown-1_(paired)_contig_79585:503-514|+	0.47	0.4	0.98	ATATGGAATTATTTTTTAGTTTCCAGGAGAATCATATCAAACATAACATCATGTCTAGCATGCAATTATACTTTTGTGCATGCATGACATGCTGCTTTTG	GTTATGGGTTTCTAAAATAGTTTGGTGAAGTTTTCCAGGTGGCATTGCACTTATTGTCTGAAAATGCGAAAAACAATCTGGCTGAGTTAGTTGGTACAAT
CPSSR_515	ATT	752	5|FCHL5JJBBXX_L2_wHAXPI059581-29_1_(paired)_contig_52944:552-766|+	5|LP150221_R1_(paired)_trimmed_(paired)_contig_77389:521-535|+	6|LP161083-1_R1_(paired)_trimmed_(paired)_contig_66057:202-219|-	5|FCHL5H3BBXX_L3_wHAXPI062220-17_1_(paired)_contig_160730:219-233|+	N/A	0.43	0.2	0.97	GGTGATCTCATCTCTTCTGTTTTAACATCACCGGTGGGAACTTACTCGTTCATGGATGTTATTCCAGGTACAAAGTTTTCTTCTTACCTACCTAACAGAA	TTTTTAACGTAACCTCCTGTCAGAATTTCAAGCCCATTTTTATGTTATGCTGCCACTCCCTTTACCTGAAAGCCTCAGTTAGCCATCTAGTTTGAAGCCA
CPSSR_516	ATT	753	6|FCHL5JJBBXX_L2_wHAXPI059581-29_1_(paired)_contig_56419:161-378|+	7|LP150221_R1_(paired)_trimmed_(paired)_contig_26730:723-743|-	6|LP161083-1_R1_(paired)_trimmed_(paired)_contig_44720:1674-1691|+	N/A	N/A	0.47	0.4	1	TTGATCGGTGAGGATGGCATATTGGACGTTTTAATGAAGCACGTATTATACTACGTTAGATTCATGCCACACTTAGTATGAGCAAGCTATAGAGCTTCTA	AACTAAAGCACATTGTTGAGGTTTATTAACAAGTATGCAAGGTTTTCTGTTAATATTCTATGCAAGTTATATGATGTTTGGATTTATGTAGTTGGTGTAC
CPSSR_517	ATT	754	7|FCHL5JJBBXX_L2_wHAXPI059581-29_1_(paired)_contig_13124:975-1195|+	5|LP150221_R1_(paired)_trimmed_(paired)_contig_24512:263-277|+	5|LP161083-1_R1_(paired)_trimmed_(paired)_contig_21721:2128-2142|+	N/A	N/A	0.94	0.4	0.98	TTATTTTATGACTAAGACGCTTGGTAGTTCATACTTTTTATTACTTCGGTTTGTTTTATGTAAACATCATTGGTCTTATTGATTTTTTTGAATTGAATCA	GTTCTAAAATTTTGAATAGCCCAAATACAATTCAGTTTCGTTGGGCTTCATTGTAGAAAACCCATTTCATCACAATAAATAAATAAAATGAAAATACTAA
CPSSR_518	ATT	755	7|FCHL5JJBBXX_L2_wHAXPI059581-29_1_(paired)_contig_248494:928-1148|+	5|LP150221_R1_(paired)_trimmed_(paired)_contig_120659:123-137|-	5|LP161083-1_R1_(paired)_trimmed_(paired)_contig_206152:280-294|+	7|FCHL5H3BBXX_L3_wHAXPI062220-17_1_(paired)_contig_196516:715-735|-	N/A	1	0.2	0.97	AGTTTTTATGTTCATAGCCTCAACTAGCTTTCACAGTGTGCTTTTTCTGGTTGGTCAATAGGACCAAAAGGATCGTTTGAAATATTATTACAACGGTTAG	TTCCTGACAAGTAGTGTAAAACTGTAAATAGTTTATTGCTACTAATTACAAGACTAAAATCCCACAAAGCAGCTATCAATTTTTTTCTCAAAGGACAACT
CPSSR_519	ATT	756	7|FCHL5JJBBXX_L2_wHAXPI059581-29_1_(paired)_contig_270874:175-395|+	7|LP150221_R1_(paired)_trimmed_(paired)_contig_156025:947-967|+	8|LP161083-1_R1_(paired)_trimmed_(paired)_contig_122226:128-151|-	8|FCHL5H3BBXX_L3_wHAXPI062220-17_1_(paired)_contig_96764:622-645|-	N/A	0.5	0.2	0.99	GTGGTATGGAAAATCAATACTTTATAAACAAGAATATTAAAAGCATAGAAAAAAGAGGACAATATTATGAAGCAAGCATGAAAGAAAGAGCTAGAGAGAG	TATGATAATGTCAGTAGAAGCAAAGGTGGGTGTGTGGTGCTATAATTTATGAGCCAATGTGTAAGGTACATACATTATCATCTGTTTTTTCTGTTTTATG
CPSSR_520	ATT	757	9|FCHL5JJBBXX_L2_wHAXPI059581-29_1_(paired)_contig_121304:127-353|+	N/A	6|LP161083-1_R1_(paired)_trimmed_(paired)_contig_87472:478-495|-	9|FCHL5H3BBXX_L3_wHAXPI062220-17_1_(paired)_contig_245057:432-458|-	N/A	1.41	0.4	0.99	CCCTATGAAGTGTATAATCCAATAATTCTTCTTCAACTTTGCCAACAAGGGTTTTGCATGATTTTCTATGGAGGAAATATCATGTACATGGCAATACCCC	ATATATTCAGCACTAAACCTAGTTAGGGTGGTTTTGGAGAGGTTACACCAAAGGGTATGTACCTCTCTATTGTATGGTTGGTATTGAGCTTGATATAGGT
CPSSR_521	ATTA	758	5|FCHL5JJBBXX_L2_wHAXPI059581-29_1_(paired)_contig_206923:51-270|+	3|LP150221_R1_(paired)_trimmed_(paired)_contig_133418:1637-1648|+	3|LP161083-1_R1_(paired)_trimmed_(paired)_contig_42483:144-155|-	3|FCHL5H3BBXX_L3_wHAXPI062220-17_1_(paired)_contig_34680:163-174|-	N/A	0.87	0.2	0.98	TTCTTCAAAACCCATGTTTCTCCTTGTTGAAACCAGCATAGTACATGCCAGCCTATGGGGAACTATCATTATTAATTACTTTAGCATGGGAACTATCATT	ATTTTTAATCAACTTTTAGTTAACTAATTTTTCTCAAATATGTCTATGAAGTATTGAAGGTGAAGAAAAAGAGGGAAGAAGAATCTTATCTAAAAAAGTG
CPSSR_522	ATTG	759	5|FCHL5JJBBXX_L2_wHAXPI059581-29_1_(paired)_contig_178938:427-646|+	5|LP150221_R1_(paired)_trimmed_(paired)_contig_12174:787-806|-	6|LP161083-1_R1_(paired)_trimmed_(paired)_contig_24052:516-539|-	N/A	N/A	0.47	0.4	0.99	AGGGTCTTCCATAGGCATGAAGTTGTTACAAACTGATCGTTGTTCATGGCATATCATCACCATTTATAATCATCGTCATCATCAAGCAAGTCAAGACAGA	ATGATGTGCCATGAACACGATCGGATTGTAGCAACTTATTTTTTTTTGGGATCAATCACAAAACAGACCCAGATAATTCATGTTGCTGCATGTCTCCAAA
CPSSR_523	ATTT	760	5|FCHL5JJBBXX_L2_wHAXPI059581-29_1_(paired)_contig_261412:19-238|+	7|LP150221_R1_(paired)_trimmed_(paired)_contig_35996:1381-1408|+	7|LP161083-1_R1_(paired)_trimmed_(paired)_contig_159051:1008-1035|+	N/A	N/A	0.94	0.4	0.99	TTTTAACTTTTACCTTTCAACTTGATTAACAGACCCTTAATCTGACACAGATATGCCCTGTTTTTATTTTTATTAACAGGAACCATTTGAATATGCATGG	TTCCTGCTTGGCCATGTGAATATATGCATGTTAGATCACCATAAAGACACCCAATTGATGAAATTCAGAAGTCCATGTCCTAGGTATATATAATCTCTCT
CPSSR_524	ATTT	761	5|FCHL5JJBBXX_L2_wHAXPI059581-29_1_(paired)_contig_78043:93-312|+	N/A	4|LP161083-1_R1_(paired)_trimmed_(paired)_contig_38762:907-922|-	4|FCHL5H3BBXX_L3_wHAXPI062220-17_1_(paired)_contig_84191:677-692|-	N/A	0.47	0.4	0.97	ATTGCAGATTTGCAGCCAAATGTCAAATTCTCTCACTTTGCCTCCCAACCAAACCATACGGCCAAAAAAACTGAATTTTGTACTTGCGGGATAGACCAAC	AAACAACGCGATGAAGTTTGACTTGTGAGAAGTCAAATAGGATAGTCGATCCACTCAACGACATAAATTGTATTTTTTACGTACCTAGTTGCAAACTCAG
CPSSR_525	CA	763	10|FCHL5JJBBXX_L2_wHAXPI059581-29_1_(paired)_contig_20036:389-608|+	11|LP150221_R1_(paired)_trimmed_(paired)_contig_25598:1547-1568|+	N/A	N/A	9|TCunknown-1_(paired)_contig_33918:814-831|-	0.82	0.4	0.97	TGGAAAATCTTGTGGTGTGAGCAAGGAGAGCTCGAGTTAGGAATTCAGAGGCTTCAAGGGTATATTTCTGAGCTCTCTGATGCATTCCAGTACCTGCATT	CGAGCATTCACAGATTTTCAAAAATCCTAATTTTTCCATTTTGCATCGTTTTAGAATTTTCTGTATAACATTGCTTTGGTTGTTGATTGTGGTTGTTTAC
CPSSR_526	CA	765	6|FCHL5JJBBXX_L2_wHAXPI059581-29_1_(paired)_contig_107104:225-436|+	4|LP150221_R1_(paired)_trimmed_(paired)_contig_155313:280-287|-	4|LP161083-1_R1_(paired)_trimmed_(paired)_contig_115550:463-470|-	5|FCHL5H3BBXX_L3_wHAXPI062220-17_1_(paired)_contig_261375:792-801|-	N/A	0.83	0.2	1	ACTTGATTGATCCCGACTTCTGAATCCACTTCAAAGACCACTGAACTCTAACCTCTTGTTTTAGCTTCAAGTGCAGCTAGCCCAAGTGCTCTTGATTGAT	CTATGTGACCCAATAACATGCCATCACTACTTTTGAAGGAGCAAGCTTCTACAAAAAATTCATCCCTGATTGCGGCGGCATCAAGGCTAGCTATGACAGC
CPSSR_527	CA	767	6|FCHL5JJBBXX_L2_wHAXPI059581-29_1_(paired)_contig_110598:66-277|+	5|LP150221_R1_(paired)_trimmed_(paired)_contig_187030:1048-1057|-	N/A	N/A	6|TCunknown-1_(paired)_contig_71335:167-178|+	0.47	0.4	0.98	AAAGTCACTTTATCCACCAACTAGTCCGATAACCGAAGTTGCATAATATATTCAGAGTTCTACAATAGATCACGCACGTACAAACTAACACACATGTATC	AACTATATGTATATGAAAATGATCACGTGCACGGCATCACAGACGAAGTGACCATTGATCTAGTGTGCATAATTGAGTCGTGGTTGATCGACAGTCACAA
CPSSR_528	CA	768	6|FCHL5JJBBXX_L2_wHAXPI059581-29_1_(paired)_contig_120269:73-284|+	5|LP150221_R1_(paired)_trimmed_(paired)_contig_95613:456-465|-	5|LP161083-1_R1_(paired)_trimmed_(paired)_contig_275523:242-251|-	N/A	N/A	0.47	0.4	0.98	GCACAACACAATAACCCTGCTGTAGTCCTTCATTAGTGACCTACAATATTAGCCCCTTGTCAAGTTCACGGTGGGTCTTATAGAGTTAAACATATAAATT	TTGAAAAAAGAAAGAAAAAGTATTTACCTTTTTCCTCCCATCATCCACATCAATATAGACTGGAGTTGTCTGAAATGACAAGCGGGCAAGATCCTCAACC
CPSSR_529	CA	769	6|FCHL5JJBBXX_L2_wHAXPI059581-29_1_(paired)_contig_129653:173-384|+	6|LP150221_R1_(paired)_trimmed_(paired)_contig_100008:2237-2248|-	6|LP161083-1_R1_(paired)_trimmed_(paired)_contig_34568:409-420|-	4|FCHL5H3BBXX_L3_wHAXPI062220-17_1_(paired)_contig_255318:183-190|-	6|TCunknown-1_(paired)_contig_86169:512-523|-	0.8	0	1	AGTGAAATATTGAGAAACTGTCACGGTTGAAATAAAGCAAACAAATTGTGTGTGAGACTGAACAAGATAATCATCCTACATATATATATGTACACACTGT	TACACATTTATATGAATATTATTTGGTTTACAAAGATATGCAGGAGCCTTAGCTACTCCACACCACAAATCAAAATCTGGCTAAAATTGTCCACTTTATC
CPSSR_530	CA	770	6|FCHL5JJBBXX_L2_wHAXPI059581-29_1_(paired)_contig_140411:454-665|+	N/A	9|LP161083-1_R1_(paired)_trimmed_(paired)_contig_82291:218-235|-	9|FCHL5H3BBXX_L3_wHAXPI062220-17_1_(paired)_contig_123886:587-604|-	N/A	1.41	0.4	0.99	CCCTAAATACACGAACCTGGCAAAGACCGCCTCCGAACTTAATGGTTTGGTTAGTCATGGTTGAAAGATCAAGAACCACATCTCCTGGAATCTATACAAG	TATAAATGTATATATTATTTGCAGTAACGTTTGTGATTGGATTTCGAATTTCTGTGAGTGATATATTACAATACGAGAACGAAGTGCAGTTGAAAACAAA
CPSSR_531	CA	773	6|FCHL5JJBBXX_L2_wHAXPI059581-29_1_(paired)_contig_168741:966-1177|+	5|LP150221_R1_(paired)_trimmed_(paired)_contig_50986:625-634|-	N/A	5|FCHL5H3BBXX_L3_wHAXPI062220-17_1_(paired)_contig_22166:657-666|-	N/A	0.47	0.4	0.99	ATTTCATAGCCCTTTCATAGACAATCCTTTGCCATCTTCCCGTTCCTTCACCGAAATCCAACCAAATTCGCTGGGGGGTTTTTCCAACTAAATCAACTTC	CGAGCCATACTAGGCTTAGTTAGATTAGCTGTTGCATTGTCCATCGCCAAAACCCTCCCTATAGGACTCATAATAGAAACCAAGTACTGTTTAGGGAAAA
CPSSR_532	CA	774	6|FCHL5JJBBXX_L2_wHAXPI059581-29_1_(paired)_contig_17289:157-368|+	5|LP150221_R1_(paired)_trimmed_(paired)_contig_60163:95-104|+	5|LP161083-1_R1_(paired)_trimmed_(paired)_contig_240975:213-222|+	N/A	N/A	0.47	0.4	0.98	AAGTTGATGTCCAAGATACCTTTGCGAAGTCTAAGTATCCACATTGAGCTCCATCTCCGCGCAAGCCTTGAATCTGAATATCATCATTGCACCTATGCTG	AAACAAAATAAATAAAACAAAAATATTTACAAATCAAACTATGAATCAAACGAAAGTTAAAGCCAACTAAGTGCCACTCCCCGGCAACGGCGCCATTTGA
CPSSR_533	CA	775	6|FCHL5JJBBXX_L2_wHAXPI059581-29_1_(paired)_contig_17926:150-361|+	7|LP150221_R1_(paired)_trimmed_(paired)_contig_44301:1255-1268|+	8|LP161083-1_R1_(paired)_trimmed_(paired)_contig_184110:779-794|-	7|FCHL5H3BBXX_L3_wHAXPI062220-17_1_(paired)_contig_176280:130-143|-	N/A	0.71	0.2	0.99	TAGCTCTCACAGAATAATGGCAATTTCATTCATTATTTATTATCCTGGTTTGCCCAACAAATACAACAAAGCCAACACCAAAGAATTTTAAAGGCTATAT	AAATGATCGCCAAGAACAAGGCTTCACGAGAATAAGGGAAACAAGGGAGTGGAGGGAGATAGAATGCTCAAGTGCCTATAACAGTGCTAACTAGAAAGCA
CPSSR_534	CA	776	6|FCHL5JJBBXX_L2_wHAXPI059581-29_1_(paired)_contig_201496:834-1045|+	3|LP150221_R1_(paired)_trimmed_(paired)_contig_149049:713-718|-	3|LP161083-1_R1_(paired)_trimmed_(paired)_contig_8747:355-360|-	N/A	N/A	1.41	0.4	0.97	ATTCCAAGCATGGTGATGACTCATGTCAAGTGCATATATAAATTCTTAAACCTACGCTTAACCTCAACAGCCCTCAAGAGAGGATTTTCTATAAGATCAT	CTTTGACACAAACTTAGAAGTCAGCCTTGGATGACTACTAGTGCGAACAGCAGCTCCAAAAGTATGGTCCTCAACAAAAGTCTTTATGAAGAAATTGCAA
CPSSR_535	CA	777	6|FCHL5JJBBXX_L2_wHAXPI059581-29_1_(paired)_contig_228104:62-273|+	N/A	N/A	7|FCHL5H3BBXX_L3_wHAXPI062220-17_1_(paired)_contig_263663:541-554|-	7|TCunknown-1_(paired)_contig_56950:2546-2559|+	0.47	0.4	1	GGGTTTCTCCTTTTTCTCTTCTTTCTGTATTTTTTTGGTAAATTAGCTAGACTTCTTTCTGAACCCCCTCTCAATTTTACAAGGCTGGGGTATTTTTAGT	CTCACACGTATATGAGGTAATATGGAAAGGTATACACCTTGTGTAGATAGTAAGAAGCACATTTCTGAGGTGACAATGGCATATTTTCCATGAGACTAGG
CPSSR_536	CA	779	6|FCHL5JJBBXX_L2_wHAXPI059581-29_1_(paired)_contig_256650:304-515|+	3|LP150221_R1_(paired)_trimmed_(paired)_contig_56723:1186-1191|+	3|LP161083-1_R1_(paired)_trimmed_(paired)_contig_69968:954-959|-	N/A	N/A	1.41	0.4	0.99	CTAGGGCATTGAACTCGATCTTCACTCTTGACAAGAACTTCAACATTTTCCACTTTCTCTGCTTCTATTTTCTTACGAATCGAATCTCAAAAGGCTCTCT	TCACAGTTTATATACTGTATTTTGTTTCTTTAATCCCACATCGGTTAGATATAAGCTTTGCAAGAGGTTTATATAAGAGATTGTGAGACTACAATGACAC
CPSSR_537	CA	782	6|FCHL5JJBBXX_L2_wHAXPI059581-29_1_(paired)_contig_46027:164-375|+	6|LP150221_R1_(paired)_trimmed_(paired)_contig_163045:91-102|+	N/A	N/A	8|TCunknown-1_(paired)_contig_171221:149-164|-	0.94	0.4	0.98	ATCATTGGTTTTAAGTTCCCCTAGATCGTTGTTGATCAACAATTAGTTAATGAAATGACCTAAGATGATGGATATTGCCATATAAGTACCCCTCCCCCTC	CTGAAGGGGTCACACTCTTTCAATTTTAAGGCGTGTTTGGGAGGAAACTAGAGGTTTATTTAGATTGTGTTCAAGAAGATGTCATCTAGTAATTCATTCT
CPSSR_538	CA	785	6|FCHL5JJBBXX_L2_wHAXPI059581-29_1_(paired)_contig_66452:137-348|+	6|LP150221_R1_(paired)_trimmed_(paired)_contig_4450:537-548|-	N/A	N/A	4|TCunknown-1_(paired)_contig_52277:475-482|-	0.94	0.4	0.97	TTTTACTCTATAAAATAAAATAAAAAGTTCATATCCAATTTGTTGAACTGAAACATTATTGTACAGATAATATTCCAAGCTAAGGCGCCCTCTCTCTCCT	CTCTTCCAGTCCAGTTTAGCCATGTCGTCGTCTATATCGAGCCCTGCCCATCCATTCCAGCCAGCGCCGCCGTATGACCGCCGGACGGCAACCAAAACAG
CPSSR_539	CA	786	6|FCHL5JJBBXX_L2_wHAXPI059581-29_1_(paired)_contig_90843:662-873|+	6|LP150221_R1_(paired)_trimmed_(paired)_contig_55388:1905-1916|-	6|LP161083-1_R1_(paired)_trimmed_(paired)_contig_184394:508-519|+	7|FCHL5H3BBXX_L3_wHAXPI062220-17_1_(paired)_contig_95784:1091-1104|-	4|TCunknown-1_(paired)_contig_44376:365-372|-	0.98	0	0.99	AATGGCATCATGAAGTGTCTAAATGTACTTAATTACTAACTGAACTTTTATCCCAACAGCTTGAGACCAGCATATACACCGCTATACGCCCGCAAGCTCG	TGATATTGGTATACATATGAATATGTGATTATAAGCATGCAACGTAATATGTTCCACTTTAATCCCGTAACAACATATGTATTTGTATTCCGATATTAGG
CPSSR_540	CA	787	7|FCHL5JJBBXX_L2_wHAXPI059581-29_1_(paired)_contig_116800:85-298|+	6|LP150221_R1_(paired)_trimmed_(paired)_contig_229839:227-238|-	7|LP161083-1_R1_(paired)_trimmed_(paired)_contig_234214:671-684|+	N/A	N/A	0.47	0.4	0.97	CAGTTGTATGGTATTGATGTAATAAAAAAAAATCGCCCCCCTCGTCCGCTGTAGTGTAACAGTAACAGAGATAGAGAGGGGGATAGGAAGGGCTAGTGGT	CTCATAATTTTATCATAATAGCAGCTATACATACAGTAGTAGTATATAGCATCATCTGGATGGATACTGGTGGTATATAGTAGGTGTAATGCTCTCTGCC
CPSSR_541	CA	788	7|FCHL5JJBBXX_L2_wHAXPI059581-29_1_(paired)_contig_121955:128-341|+	5|LP150221_R1_(paired)_trimmed_(paired)_contig_95102:858-867|-	N/A	5|FCHL5H3BBXX_L3_wHAXPI062220-17_1_(paired)_contig_98223:299-308|-	N/A	0.94	0.4	0.98	GTTTTTAGTCAAGAATTAATGTCGTTTTCTTCAGTGGACCCCACCGTACCCCACACGCAACCAAAAAACGGACCCTTTCTCTTTCTCAAGTTTCTCTTCC	GCCGCCCCTGAACCCCATTCATCACCACCTTATTTAAGAAGTCTATTTGACGCGCTTGGTCTAGTCGTGGATTGAATTTCATCATGTCTTCATGGGGTGG
CPSSR_542	CA	789	7|FCHL5JJBBXX_L2_wHAXPI059581-29_1_(paired)_contig_123664:95-308|+	7|LP150221_R1_(paired)_trimmed_(paired)_contig_463:212-225|+	N/A	8|FCHL5H3BBXX_L3_wHAXPI062220-17_1_(paired)_contig_185607:145-160|-	N/A	0.47	0.4	0.98	TAATTACCGGTTGTGTGTGGGACGGGGTGATTCCACGTGCCTGAGGGATCAGTTCGATGCTCTAAGAGGCTTGGATACCCCATGAGCAAACCCTCTCTCT	GGTTCCATCTCTTGGACTAATGGGATGATGCAAACTATGTGGTAGATCTATGGGATCCATGAAATTTCAGCACAGTGTCCTTTAATTTTACTGTTCTTTT
CPSSR_543	CA	790	7|FCHL5JJBBXX_L2_wHAXPI059581-29_1_(paired)_contig_142086:1269-1482|+	7|LP150221_R1_(paired)_trimmed_(paired)_contig_94892:201-214|+	7|LP161083-1_R1_(paired)_trimmed_(paired)_contig_67817:480-493|-	N/A	8|TCunknown-1_(paired)_contig_29796:396-411|+	0.43	0.2	0.99	AATAGTACCAGCATCACTTGTGACAAAGAGCTTGTCCAAATGATTGATGACCATCTTATTCATACCTGAACACAACAATAAAACATGGGAGTAAGTATTC	GTAAAAACCAGTCCCCAGACTGCTTAAATTGGTAATGTTAAAAAGTATTTACGCACTCTACACCAAATGGAATAAAACCCCCATCGTCAATGAATGGACG
CPSSR_544	CA	791	7|FCHL5JJBBXX_L2_wHAXPI059581-29_1_(paired)_contig_149603:70-283|+	4|LP150221_R1_(paired)_trimmed_(paired)_contig_25020:3420-3427|-	4|LP161083-1_R1_(paired)_trimmed_(paired)_contig_165327:914-921|+	4|FCHL5H3BBXX_L3_wHAXPI062220-17_1_(paired)_contig_171763:239-246|+	N/A	1.3	0.2	0.98	TTATTTCAGGTAACATGAGTATTCCTTTTATTTTAAGTCTCTATTTGTTGCACCTCTTACCACACCTTGTTGCTTTTGAATATACATGTATACATACAAC	TACAGACAAACTCACACCCTTATTTACTGATTGTCTGCATCTGTTGGCTGGTGGATTTGTCTCCCCTATGTACTGTCATTGATTATTTGATTCAGCTCTT
CPSSR_545	CA	793	7|FCHL5JJBBXX_L2_wHAXPI059581-29_1_(paired)_contig_165888:298-511|+	9|LP150221_R1_(paired)_trimmed_(paired)_contig_27946:365-382|+	4|LP161083-1_R1_(paired)_trimmed_(paired)_contig_160953:1172-1179|-	N/A	N/A	2.05	0.4	0.97	ACTTGCTAACAAAGCCAAAGTTCAGACACACAACTTGGAATCTCAGCAATTAAATTATACATTACCCATTCCAACATCTGTCAAACCCACCTCTCTCTTT	AACAAATGAGTATGTTTTACTTGTTAATTAAATAATTATGCCTTTCCTAAAAAGGCACTTAACTGTTTCTTTACACACCTAAACCCATGAAAGAAGTGAG
CPSSR_546	CA	794	7|FCHL5JJBBXX_L2_wHAXPI059581-29_1_(paired)_contig_171726:43-256|+	5|LP150221_R1_(paired)_trimmed_(paired)_contig_118677:261-270|+	5|LP161083-1_R1_(paired)_trimmed_(paired)_contig_114018:975-984|-	N/A	N/A	0.94	0.4	0.99	CCACAAACTAATTTTTTGATCCCAATCAATACTCATAAGCTGAACCACCAAACAGTCACTAAACCAAAATCTCCCCCTCACTTTCCCGCCTCCTCTCTCT	GATATCAGAGAGTAATTTTTCTCAATAATTTTCTGAGGAACTGATTGTTGCAGTTTTTAAAGCTTTTCTAATGACGATTCGATTCGCTTCGTTCCTCACC
CPSSR_547	CA	795	7|FCHL5JJBBXX_L2_wHAXPI059581-29_1_(paired)_contig_176690:301-514|+	6|LP150221_R1_(paired)_trimmed_(paired)_contig_3450:1381-1392|+	6|LP161083-1_R1_(paired)_trimmed_(paired)_contig_176173:253-264|-	N/A	N/A	0.47	0.4	0.98	TAAAGTTCGAACATGTTGGGGTGGTCGGAAGCCGAAAAAGTTGGAGAGAGAGGAGAGAGAGTCACGACACGACTCACGACCCGTCGATCCATGCGGGCCC	CTGGCAAAATGCTCATCAACCGACACATGTCAGCCATGGGGCTTTTAATTTTTTATTAATTAATGGGACATATTTCGATTTTGGGGCAGAAATAAAGGCA
CPSSR_548	CA	797	7|FCHL5JJBBXX_L2_wHAXPI059581-29_1_(paired)_contig_237688:7-220|+	6|LP150221_R1_(paired)_trimmed_(paired)_contig_4676:3557-3568|+	6|LP161083-1_R1_(paired)_trimmed_(paired)_contig_2703:7766-7777|+	N/A	6|TCunknown-1_(paired)_contig_67323:260-271|+	0.43	0.2	0.99	CAAATCTTTCCGAGGCATCTGTTGTTGCACCAACACTCTGAAACTGCGGCGCTTTACCACCTGCATGAAATAAGCAGGATTACAATAGCCAGTGAATAAT	ACACAAGTGTAAATCAGTTGTACAATCCTGCTATTCCTATGATGGATGAACATGGCATCCAGTGGTAAGCGGAACATAGTGAGCAAGACGAACAATACGA
CPSSR_549	CA	798	7|FCHL5JJBBXX_L2_wHAXPI059581-29_1_(paired)_contig_253010:294-507|+	7|LP150221_R1_(paired)_trimmed_(paired)_contig_227795:304-317|-	6|LP161083-1_R1_(paired)_trimmed_(paired)_contig_237778:510-521|+	N/A	7|TCunknown-1_(paired)_contig_91501:2369-2382|+	0.43	0.2	0.99	TGACTCTGCCCCCCATCTTTTACATGGACCTTCAAAACTTCATTCTCAAACTAATATCCCAATGCAATATGACCATCCGAGATATTTTGAAAAACATGTG	TGCACATATGTATGTCTTCATGAATGTACGCAACAATGATTGCATATGGTTGCATACGCTTTTCTAGCGAATGCAAATTCAGGAAAGGGGTAATTTCCGT
CPSSR_550	CA	799	7|FCHL5JJBBXX_L2_wHAXPI059581-29_1_(paired)_contig_33029:796-1009|+	12|LP150221_R1_(paired)_trimmed_(paired)_contig_38411:1520-1543|+	N/A	9|FCHL5H3BBXX_L3_wHAXPI062220-17_1_(paired)_contig_286532:129-146|-	N/A	2.05	0.4	0.98	GGGCCAAGGATCCCCAATATTTTTTTTGAGAAGTTGCATTTTGCCCTTCAATTGGAGATTTATAAAAATGCCTTAAAACCTTCAATTCCCCCCACCCCCC	ACTTTTGAATCCTGGGTCTGCCCCTGGTCATTAGTATTACCAAATGGAAGCATACGGATTAGAAAATTAAGTTCTTTAATCTTTAGCTTTGTAATTATTT
CPSSR_551	CA	800	7|FCHL5JJBBXX_L2_wHAXPI059581-29_1_(paired)_contig_54391:714-927|+	7|LP150221_R1_(paired)_trimmed_(paired)_contig_105867:165-178|+	7|LP161083-1_R1_(paired)_trimmed_(paired)_contig_218838:181-194|+	6|FCHL5H3BBXX_L3_wHAXPI062220-17_1_(paired)_contig_261785:200-211|+	N/A	0.43	0.2	0.99	AGTATAATTAGGAATAACATTAATAACCTTAAAACAATTAATAAAACATCATGTTTTCTTTCTTTTTGTTTAACTCCCAACAAGGTTACCTGTCATTTGT	TGTGAAATTTTTTGTTGATCAATATTTTTGGACTTTGATTTCTTTTTATATGATTATTTTTTTGGACTGATCAATGAGGATTAGATCAAGATCTTATAAT
CPSSR_552	CA	804	8|FCHL5JJBBXX_L2_wHAXPI059581-29_1_(paired)_contig_18061:1558-1773|+	8|LP150221_R1_(paired)_trimmed_(paired)_contig_77217:1125-1140|-	N/A	7|FCHL5H3BBXX_L3_wHAXPI062220-17_1_(paired)_contig_30231:767-780|+	N/A	0.47	0.4	0.97	NNNNNNNNNTAGGTCATACAATTTCAGAAATGGACTTTAGCTTACATTATCTGGCACTTGTTTGCTGTTCAACAATGGAGTGAATAAGGAGACTCAAGTT	GCAAAGAGAGAAATCTATATCTAGATAGTATATCTAATTTCTGGCAGAAGATAAGATATTGACCATTCTTGCATAACTACATTATTTGAACTAAGGCTAA
CPSSR_553	CA	805	8|FCHL5JJBBXX_L2_wHAXPI059581-29_1_(paired)_contig_217667:356-571|+	4|LP150221_R1_(paired)_trimmed_(paired)_contig_173767:678-685|-	8|LP161083-1_R1_(paired)_trimmed_(paired)_contig_180993:601-616|+	7|FCHL5H3BBXX_L3_wHAXPI062220-17_1_(paired)_contig_154678:194-207|-	N/A	1.64	0.2	0.96	CACTGGCGGACTTGACAAGGCACAGCAAGTCAGCATCTGTCCAAACCCCACATCCGCCGTCTGATCAAAATCGAACGGTCCAAAATCAATTAATCTCTAC	TAAATTCCTCCACTGTCCTCGTATCTCCATTTCTGAAAACCTGTCATCTTCTTCACAGACGCCACAACAATGGCGTCCTTCGCCATCACCTCTTCTCTCA
CPSSR_554	CA	807	8|FCHL5JJBBXX_L2_wHAXPI059581-29_1_(paired)_contig_25992:674-889|+	7|LP150221_R1_(paired)_trimmed_(paired)_contig_127412:644-657|-	7|LP161083-1_R1_(paired)_trimmed_(paired)_contig_47844:1595-1608|-	N/A	N/A	0.47	0.4	0.98	GAAGCAATATTGCACCAAACAAGATTAGAGTTGATCATAGAATTATGAGGCGTTTTGTTTGTTAAGGCTGTGGTGCCTTTATCTCTCTCTCCCTCTCTCT	GACACTAATTATGCTTCTTGTGTTACAGTTTACGGGGTACTGTTCAAACCATTAAAACTGCCGCACTTATTCTACTTCTGTGTTACAGTTCACAGGTTAA
CPSSR_555	CA	808	8|FCHL5JJBBXX_L2_wHAXPI059581-29_1_(paired)_contig_50921:910-1125|+	8|LP150221_R1_(paired)_trimmed_(paired)_contig_26566:5702-5717|+	N/A	9|FCHL5H3BBXX_L3_wHAXPI062220-17_1_(paired)_contig_255627:359-376|+	N/A	0.47	0.4	1	CTAACATTCTTCATCACAAGACCAGAAATGTAAGATTCTAAATGCTATTAAACTCTCCTACGTGTACTTGAAGCCACACACATATATATACACCCACCTC	TGAACTAGTGGGGCCACAAAACAATAGCTGATTAAAGCAAAAACAAACATGTGCAATTAGCTAAATACAGAAGAAAGTGCATAAAATATATACCTGGACA
CPSSR_556	CA	809	9|FCHL5JJBBXX_L2_wHAXPI059581-29_1_(paired)_contig_228695:52-269|+	8|LP150221_R1_(paired)_trimmed_(paired)_contig_93114:2541-2556|+	N/A	7|FCHL5H3BBXX_L3_wHAXPI062220-17_1_(paired)_contig_8846:1074-1087|-	7|TCunknown-1_(paired)_contig_36340:1902-1915|+	0.83	0.2	1	CCTCGAGGTTGAGCAGTTCTATCCTTCAACTGCATCAGAATAACAAAAATACTGTTTCACAAAGGGGAAGCATTTATTGAAGAATTTTTAGCATAATACT	TATATACATATATGGATATACATGTGTATGCGTATGTGTAGCTATCACCTCAAATTTTACCTCTTCATCTTCTCTTCTCTTTCTTGTATAAGCCATCTCA
CPSSR_557	CA	810	9|FCHL5JJBBXX_L2_wHAXPI059581-29_1_(paired)_contig_68659:542-759|+	8|LP150221_R1_(paired)_trimmed_(paired)_contig_10528:1902-1917|-	9|LP161083-1_R1_(paired)_trimmed_(paired)_contig_883:2407-2424|+	9|FCHL5H3BBXX_L3_wHAXPI062220-17_1_(paired)_contig_10181:879-896|+	N/A	0.43	0.2	0.98	AGAGCAGTATTATTTGTGATCTTAGCTCTAACATTAATAGTTTCACCAACTCCAGATAGTGCCTGAAATAAAACAAAATATTCAGTTCATATCTCTCTCT	CGTCAAGAGACAGACAGACAGAGAAAAATGCCTTCTCATAGATGAATAAATTTCCATGAGATGAATAAGTTTTTAACTCACCAAATATGCCTTCCCAAAA
CPSSR_558	CAA	811	10|FCHL5JJBBXX_L2_wHAXPI059581-29_1_(paired)_contig_1329:533-762|+	11|LP150221_R1_(paired)_trimmed_(paired)_contig_227:1108-1140|+	N/A	10|FCHL5H3BBXX_L3_wHAXPI062220-17_1_(paired)_contig_187631:352-381|+	N/A	0.47	0.4	0.96	AATGCCTCCTCCTGGCCTCTTCTCCATTGGCTTCAGCTTGTTAGCTGTTATTGTTCTCTTCCAGATCTGCCTCCTCCCCAATATTGCACTTGTTACAGCC	TTACTACAACAACTACAACTACAACTACAACAAGGTTTAGATGTTGATTTAGTTGTGGATCCAAGCCTCACATTTGAGAACCCAAGGCTAAGGCAGGCTT
CPSSR_559	CAA	813	5|FCHL5JJBBXX_L2_wHAXPI059581-29_1_(paired)_contig_118501:339-553|+	6|LP150221_R1_(paired)_trimmed_(paired)_contig_186020:226-243|-	5|LP161083-1_R1_(paired)_trimmed_(paired)_contig_230942:112-126|-	5|FCHL5H3BBXX_L3_wHAXPI062220-17_1_(paired)_contig_269069:256-270|-	N/A	0.43	0.2	1	CGCAACTTCAATGATTCCTGCATGCAACATAGTCGAAGTAGAACGGATGGTGTAACAAGAACATATAATGTTTCTGCATGAAATTTTCTTTTAGCTTAAG	AAGAGGTACAAATATTTCACTGTTGCTATTCAATTTTGTACGCACCTCCTATGTAGTCTTAGCAGTTAAGGAGAGCATTAAGATGTGTATTTCTGATCTT
CPSSR_560	CAA	814	5|FCHL5JJBBXX_L2_wHAXPI059581-29_1_(paired)_contig_141541:164-378|+	3|LP150221_R1_(paired)_trimmed_(paired)_contig_189277:469-477|+	3|LP161083-1_R1_(paired)_trimmed_(paired)_contig_68696:1288-1296|-	N/A	N/A	0.94	0.4	0.97	CGATTAGGGTTAGGGTTTCTTCCTTCCTCCTCTTCCCTCAAATTCTCTTCCTCTCTCTCTCCAACCAATCTCTCTCTACAATTCCACAACTTCTCTCTCT	GACGACCAAGAAATGGCAATGTGGTGGTGATGAGCATGGAAGCCGGCATCGGAATGATGGGAACCAAGCTCGGAATGATGACCTATTTCGAAACCCAAGG
CPSSR_561	CAA	818	5|FCHL5JJBBXX_L2_wHAXPI059581-29_1_(paired)_contig_250474:17-231|+	4|LP150221_R1_(paired)_trimmed_(paired)_contig_47965:1685-1696|+	4|LP161083-1_R1_(paired)_trimmed_(paired)_contig_82312:2505-2516|-	N/A	8|TCunknown-1_(paired)_contig_125104:222-245|-	1.64	0.2	0.99	TCATGACCAACTTGGTCTTGAGCAATCTGGTTCCATAGGGCTAAACCACTTAACCCCATCTCAGATTCATCAGATCCAAGCTCAAATCAACCTACAAGCT	CACCACCATTTCTACCCTACCACCATGGATACTACTACACCTTCATATCATCATCACCATCAGCAACATCAAAATCAACAAAATCTGCTCAATTTCCTTA
CPSSR_562	CAA	819	5|FCHL5JJBBXX_L2_wHAXPI059581-29_1_(paired)_contig_3286:764-978|+	4|LP150221_R1_(paired)_trimmed_(paired)_contig_218664:429-440|-	4|LP161083-1_R1_(paired)_trimmed_(paired)_contig_19828:348-359|+	N/A	N/A	0.47	0.4	0.99	TCAAATATAACCCAAACCCAATATATATCAACAATCCACAATCATCAACAACAACTACAACAACAACATCATATACAACAACAATCAACGATAACAAAAT	CATCCAATTAATCAAGAAATCAAAATAGGGGAAAAGAGGCTCACAAGGAGGGATGTTCGCTATTGAATTCGCCAAAGGAAAACGACCATTGCTCCACCAA
CPSSR_563	CAA	820	5|FCHL5JJBBXX_L2_wHAXPI059581-29_1_(paired)_contig_37449:594-808|+	N/A	5|LP161083-1_R1_(paired)_trimmed_(paired)_contig_79956:369-383|+	3|FCHL5H3BBXX_L3_wHAXPI062220-17_1_(paired)_contig_51467:239-247|-	N/A	0.94	0.4	0.97	TGTTTTAGATGGTGGCTAAACTGGCTTGAGTACGTGAACCAAGAGGAATCATCTTTTGCAGAGCAGCAGCAGCATTGTGAATCAGTTGTTGTTGGGAGTT	CTGGTTTGATGAAGAGGCCTTCTGTTATTGATAACTCTGATTTAATTTATGAGTCAAACGCAACAGAGTTGTCCCCTCCCACTGAGGGAATGAAGGAGCT
CPSSR_564	CAA	821	5|FCHL5JJBBXX_L2_wHAXPI059581-29_1_(paired)_contig_68485:1202-1416|+	N/A	N/A	4|FCHL5H3BBXX_L3_wHAXPI062220-17_1_(paired)_contig_271366:232-243|-	4|TCunknown-1_(paired)_contig_50868:501-512|+	0.47	0.4	0.96	GACCCTCGCCGTGTACCGCCCAGCACCGTCGAGTTTCGCTAAATTCGACATCAACGCCATCCAAGAGCCATGGGTCATGCTCGACGACCAAACTCCGGAC	CAGAACGAGAAGAATCAGAATCAGAACCAGAACCCGACCCGAGTTCATGATCCGATGCTCGAGAAGCTCAGCAGCAAGTTCGAGCTCGTGTCGGGTGCTC
CPSSR_565	CAA	822	5|FCHL5JJBBXX_L2_wHAXPI059581-29_1_(paired)_contig_86641:2691-2905|+	9|LP150221_R1_(paired)_trimmed_(paired)_contig_41372:381-407|-	5|LP161083-1_R1_(paired)_trimmed_(paired)_contig_131043:423-437|+	N/A	N/A	1.89	0.4	0.95	TGTTCCGCCGAATACGAGTTTTCACCATGTTGGCTATGCACCCTCAGCACAGCAACATTATGCTCCGCAACCACCACCTCCTTCTCACCACATGCACCCT	CATCAACAACAGTACCCGTACCCACCGCCACCTCCTCCACCGGATTCTTCTTACCCACCACCACATCCTCCTTCATTGTCTCAGAATTCAATAATGCCGC
CPSSR_566	CAA	824	6|FCHL5JJBBXX_L2_wHAXPI059581-29_1_(paired)_contig_13426:53-270|+	N/A	N/A	6|FCHL5H3BBXX_L3_wHAXPI062220-17_1_(paired)_contig_71562:339-356|+	8|TCunknown-1_(paired)_contig_39128:215-238|+	0.94	0.4	0.99	AGGCCTCCACTCTCACTCCTCATGTCTTCTCTCTCTCATTCAACTCTTACTATCAAACCCATCAACACTTCACCACGCCACCTCCATTTTTACTCACACC	CCCAACACCACCTTCTTCCCATGGCGTACTCTGATTCGCAGTCACGCCTCAGATTCGCACGACCCTTTTCATGCAATCACATTGTTCAAATCAATGCAGA
CPSSR_567	CAA	825	6|FCHL5JJBBXX_L2_wHAXPI059581-29_1_(paired)_contig_176907:252-469|+	8|LP150221_R1_(paired)_trimmed_(paired)_contig_9218:474-497|-	8|LP161083-1_R1_(paired)_trimmed_(paired)_contig_11342:381-404|-	N/A	N/A	0.94	0.4	1	GTTTACGACGCTGCCGCCGTCAGGTTGAAGGGTCCTCACGCCGTTACCAACTTTCCTAACCTCGTCTCTAAGACGGAAAGTGTCGTCGTCGTTAATAGCC	ACACAGCCGCGTCATCACCCACGTCAGTACTGCGTTACGTAGAACTGACTCCGTTTGAAAGTTGGAGTTACGGTGATGTGGACGCCTTCGGGTTCGATAT
CPSSR_568	CAA	826	6|FCHL5JJBBXX_L2_wHAXPI059581-29_1_(paired)_contig_217388:63-280|+	6|LP150221_R1_(paired)_trimmed_(paired)_contig_99943:1064-1081|-	N/A	6|FCHL5H3BBXX_L3_wHAXPI062220-17_1_(paired)_contig_134862:268-285|-	7|TCunknown-1_(paired)_contig_123384:786-806|+	0.43	0.2	0.99	AAATCCTTAAACTACAACATGCATGAAGTCCACATCCCTGTTTCATCAGTTGAAATCCTAAACAGCTCAGAATTTCATCAAGACAACCACAAAATCATCT	CTAAAAGCATCATAAAGAATGAAATTAACCAATTTATATAGTAATTAGCAACCAATCATGAAGAAATTTGACAGAATTTCAACTACTTAAATGATTATTA
CPSSR_569	CAA	828	6|FCHL5JJBBXX_L2_wHAXPI059581-29_1_(paired)_contig_236975:152-369|+	6|LP150221_R1_(paired)_trimmed_(paired)_contig_127460:270-287|-	7|LP161083-1_R1_(paired)_trimmed_(paired)_contig_49473:242-262|-	N/A	N/A	0.47	0.4	0.99	AGCACAACGCGATCTCAATTACCAGAAACCAGGATCCCGACCGTCGAAGCCGGTGGCGAATTTCGTCCAGCCACCGCCACCGCCACAATCACGCACCGGG	CGAGGAGGAGGTGGTTCGGTACAGAAGAACAACCCTAATCATTCGAGTTCTTCTTCTTCGTTGAATCAGATGCAGAAGAACAACAATAATAATAGGAGAA
CPSSR_570	CAA	829	6|FCHL5JJBBXX_L2_wHAXPI059581-29_1_(paired)_contig_241375:117-334|+	2|LP150221_R1_(paired)_trimmed_(paired)_contig_72940:221-226|+	2|LP161083-1_R1_(paired)_trimmed_(paired)_contig_96494:139-144|+	N/A	6|TCunknown-1_(paired)_contig_42399:2197-2214|-	2	0.2	0.92	CACCATTATCTACAAGTCCTTACGATAACTACTTTCCCTCCATTTCCTTTCCTATTCACAAAGTAATACAGAAATGGTCAATCCAACATACCAATCACTT	AAAATGCAAACACACTCCCCTTACCTGTGGGAAGTACATATTACTATGACCAGTCTCCTTGAATTTAACATTCAAATAATCCTGCAAAAAAAATTATAAA
CPSSR_571	CAA	831	6|FCHL5JJBBXX_L2_wHAXPI059581-29_1_(paired)_contig_32438:701-918|+	4|LP150221_R1_(paired)_trimmed_(paired)_contig_70068:3905-3916|+	5|LP161083-1_R1_(paired)_trimmed_(paired)_contig_12039:822-836|+	N/A	N/A	0.82	0.4	0.99	AAAATGTTGGTTCTTTGCCTAACGCTATGGCTATGGCTGCTTTTAGGCATAACAATTATAAAGGGAAGTCAGGCAATAGTGGTAAAGGAAAGGCTCCATT	CTTTCATTCTGGACAGTTCTTTGGAGGGTTTTCTCCTCATTCTGATTCAGGACATTCTGTTCAATCATCTGGATATGGAGGTAATGTTGGTTCTGGTAAC
CPSSR_572	CAA	832	6|FCHL5JJBBXX_L2_wHAXPI059581-29_1_(paired)_contig_76024:466-683|+	6|LP150221_R1_(paired)_trimmed_(paired)_contig_77009:2754-2771|-	N/A	4|FCHL5H3BBXX_L3_wHAXPI062220-17_1_(paired)_contig_236658:171-182|-	8|TCunknown-1_(paired)_contig_68665:586-609|-	1.41	0.2	0.99	GTCGTCGCCGGTTAAAGAAGGAGGGAACGAGGCGTATTCTAGGTTGTTGAAACAAGAGCTTTTTGGGTCTGATTTTGGGTGTTTTTCTTCTCCTGCAGGT	GGGGGTTCTCCCATGAGTCCTAGCACGAATATGTTGCGGTTCAGGACGGATCATTCTGCGCCTAATTCTCCGTTTTCACCTTCGATTCTGGGTAGTGATA
CPSSR_573	CAA	834	6|FCHL5JJBBXX_L2_wHAXPI059581-29_1_(paired)_contig_90412:710-927|+	8|LP150221_R1_(paired)_trimmed_(paired)_contig_103694:1262-1285|-	7|LP161083-1_R1_(paired)_trimmed_(paired)_contig_193066:161-181|+	6|FCHL5H3BBXX_L3_wHAXPI062220-17_1_(paired)_contig_231479:273-290|+	N/A	0.83	0.2	0.98	CCAACCTAAACGAGCTTGTTTTCATAAATTAACGAAAACAGATTTTCTGTTGCCATGTTGATTATACAGATAATTGCAAAAACAAAAGCATCAGCAGCAG	ACAAAGGAGTGTGTAAGGAAGGAGTGAGTAGGTAGTGAGAGAGATATAGTAGTATGTTATGTGTTGCGAGAAAACAGAAAAAACAAAAACAAAGTGAAGC
CPSSR_574	CAA	836	7|FCHL5JJBBXX_L2_wHAXPI059581-29_1_(paired)_contig_219225:136-356|+	N/A	5|LP161083-1_R1_(paired)_trimmed_(paired)_contig_50921:451-465|-	4|FCHL5H3BBXX_L3_wHAXPI062220-17_1_(paired)_contig_287075:134-145|+	N/A	1.25	0.4	0.96	GTAAAAAACTAAGAAGCGAAGAAGGATCAAACCCTAACACCCAAAAAAAATCGTCCGAACGGCGGGTACAAGATTGGAAGAAGAAAAAGAACAGCAAATC	GCAAAAGAACAAGAAGAAGCCAAATGTGGAAACAGAAGAGAAGCCCAAGATTCATCAACCTAAGCCGGTTAGGGTTACTTCATTTTCATTACCAAGAAAT
CPSSR_575	CAA	837	7|FCHL5JJBBXX_L2_wHAXPI059581-29_1_(paired)_contig_22497:589-809|+	4|LP150221_R1_(paired)_trimmed_(paired)_contig_75085:4149-4160|+	4|LP161083-1_R1_(paired)_trimmed_(paired)_contig_36119:414-425|-	5|FCHL5H3BBXX_L3_wHAXPI062220-17_1_(paired)_contig_68706:249-263|-	N/A	1.22	0.2	1	AAAAATTAAAAATCTCACCAGTAGATGCACCACTTGGGACTGCAGCTCTAGCAAGAGTTCCATCTGATAAAGTAATATCAACCTGAAAATCCCCACATAT	CTCAAAATTCCTTAATACATCATTTTTCAAATTAGAATGATCAAATACATAATTAAGAACAATAATCTGTCTAAAATTCTAATGCACGAACAATCAAACT
CPSSR_576	CAA	838	7|FCHL5JJBBXX_L2_wHAXPI059581-29_1_(paired)_contig_27402:478-698|+	5|LP150221_R1_(paired)_trimmed_(paired)_contig_56671:168-182|-	7|LP161083-1_R1_(paired)_trimmed_(paired)_contig_43407:712-732|-	7|FCHL5H3BBXX_L3_wHAXPI062220-17_1_(paired)_contig_87607:126-146|+	N/A	0.87	0.2	0.98	ATTGCCGACCTCAGGTAGCGAACTAGGAAACAATCATCAGTCCATGAGCCCCTCTTCTATTCTTACACCACCAGGTATACATCAGCACCCATTGGAGAAC	CAGCAAAACTCTCCGCCTGCTGCGGATACATCGACGACGACAACCGCCGCGGGGTCTACACCGCCTACACCTGCAGCGATATCCGCAATTCTGATAAAAG
CPSSR_577	CAA	839	7|FCHL5JJBBXX_L2_wHAXPI059581-29_1_(paired)_contig_57090:504-724|+	N/A	N/A	7|FCHL5H3BBXX_L3_wHAXPI062220-17_1_(paired)_contig_242371:474-494|+	5|TCunknown-1_(paired)_contig_41663:1107-1121|-	0.94	0.4	0.99	CTTCAAACAACCTTGTAAAGGTTCAGGCTACAGAAGCATCAAAGCTATGGCTGGTGAAACCAGAGACAATCTTGACCACCTTCAAAGAGCCAGACAACTT	TCCCAACCCAAAAAAAGAGTTGCCCAAGTTGCACCATTAGGTACCTAAACTCATACCACTTTCATCTGCACAAAAAAATTGCCATATTTTCATTGATTTC
CPSSR_578	CAA	840	7|FCHL5JJBBXX_L2_wHAXPI059581-29_1_(paired)_contig_90240:323-543|+	5|LP150221_R1_(paired)_trimmed_(paired)_contig_47768:2093-2107|-	5|LP161083-1_R1_(paired)_trimmed_(paired)_contig_266634:129-143|+	4|FCHL5H3BBXX_L3_wHAXPI062220-17_1_(paired)_contig_70451:541-552|+	N/A	1.09	0.2	0.98	CAGGAGCGGCTACATTATAGCCGCTGCTGCCCGGTGTTGGCTGCGTGGTTATACGCAGCCTACTCCGACACTGCCCTTGGGCGGTCAGGCAAAATGGGCC	CGACATCCTCATCGCCGTACGACATGCCGCAATTGCCGGACGACTCGGAGACATGCGTGGATGATTTGGAGAAGGCAATGAAGGAGAGGAAGATGGAGTT
CPSSR_579	CAA	841	8|FCHL5JJBBXX_L2_wHAXPI059581-29_1_(paired)_contig_183381:13-236|+	6|LP150221_R1_(paired)_trimmed_(paired)_contig_123006:474-491|+	6|LP161083-1_R1_(paired)_trimmed_(paired)_contig_228873:329-346|+	N/A	N/A	0.94	0.4	0.97	AAGGCGTAGAAAAAGCATAACTCGTAGTAGTATATCTCAATAGAGAGCACCCAGCGAAGAAGCTCTCCAAAAAACAAAAAAATGGAGTTCGCATTATCTG	CAGCAGCAACAACTCTCTTCATCTCCGGCCTCCATCGCCACTTATACAAGCCTAATTTAACTCGATGCCTCCATACTCAACTCGTACATCGTCGATTCAA
CPSSR_580	CAA	842	8|FCHL5JJBBXX_L2_wHAXPI059581-29_1_(paired)_contig_215379:96-319|+	5|LP150221_R1_(paired)_trimmed_(paired)_contig_167854:424-438|+	5|LP161083-1_R1_(paired)_trimmed_(paired)_contig_61835:103-117|+	4|FCHL5H3BBXX_L3_wHAXPI062220-17_1_(paired)_contig_148813:313-324|+	N/A	1.5	0.2	0.95	TAAAGACGAACACCACAACACAAGGGCGAATGCTATTGCTATTGCAATTTGCAGTAGCAGAAAATTGATTTTGATCATTATTCCAATTTCCAAACACCAT	GAAAGAAGAAGAGTATCCCTGCAACAATATGGTTTCACTCCCAACTTGGTTTCGCTACCTAGCTAACAAGCTCGAGTACTCCGTCTCTCTCAGTTGGAAG
CPSSR_581	CAA	843	8|FCHL5JJBBXX_L2_wHAXPI059581-29_1_(paired)_contig_65236:110-333|+	N/A	N/A	5|FCHL5H3BBXX_L3_wHAXPI062220-17_1_(paired)_contig_123365:622-636|-	5|TCunknown-1_(paired)_contig_23275:464-478|-	1.41	0.4	0.95	ATTTTCACACTCTTATCCTCTCTTATGAGATTGTTAGAAACTTAGAATAGCAATTCAGATTCCTAACCAAACGTTGTTGAACACCACAAAATATATACAG	CAGCAACAACAACAAAAAAGAGAGGCAATCCTTTCGAAATTAGAAGAAAATGACATTCAACTAAAATACAACGCTTTCTTATACAGTTCCATAGAAATAG
CPSSR_582	CAA	845	9|FCHL5JJBBXX_L2_wHAXPI059581-29_1_(paired)_contig_185185:243-469|+	8|LP150221_R1_(paired)_trimmed_(paired)_contig_232677:166-189|-	8|LP161083-1_R1_(paired)_trimmed_(paired)_contig_22954:268-291|+	N/A	N/A	0.47	0.4	1	ATCAGATGCAGAATGAGAGCTCTCATGGAAATGGTAATGGTAAGGAAGGTGGTGGTGGTGATTTGGAAGCTCAGGATGGCATAGACCAGACCTCCATAGC	CGAGGTTGGTCAGAGTGAGACGGTGGTCACCATTGTTGTTGTTTCTGATGGGGAAGGTCTAAATCAGGTGAGAGTGAATCCAGAAACAACAACTGCTGCC
CPSSR_583	CAA	847	9|FCHL5JJBBXX_L2_wHAXPI059581-29_1_(paired)_contig_60641:229-455|+	8|LP150221_R1_(paired)_trimmed_(paired)_contig_79441:696-719|+	6|LP161083-1_R1_(paired)_trimmed_(paired)_contig_73316:897-914|-	7|FCHL5H3BBXX_L3_wHAXPI062220-17_1_(paired)_contig_51439:187-207|-	N/A	1.12	0.2	0.99	TGGGCTAATTTAGGGAGGGAATTGTTGGTTTCTTCAATGGCGGCGGCGGCAACGTCAACGACAACTGAGTCTTCTTCTCCTTCACAGGATGCGACCACAG	CATCGTCGTCGACTTCTCAAGATAAGGAATCACAGTCTTTGATTGATTTTGGTTTGATTCCCAGCTTCAATTCCTTGAAGTTACAGTTGCCCAGTTGCAT
CPSSR_584	CAA	848	9|FCHL5JJBBXX_L2_wHAXPI059581-29_1_(paired)_contig_63129:599-825|+	6|LP150221_R1_(paired)_trimmed_(paired)_contig_64461:2789-2806|+	N/A	6|FCHL5H3BBXX_L3_wHAXPI062220-17_1_(paired)_contig_73832:2472-2489|-	6|TCunknown-1_(paired)_contig_68462:3048-3065|-	1.3	0.2	0.96	CGATGATGATGACTTCTCCGACTTAGTCTCTGTCAGGATGAGAAAAGATGAAATCAACGCCGTCCATCATTCTTCATCCAACGTTACCAATCATCAACCC	CAGCAACAACAACAATCTCTTGTTCAACCTAGGGCTTCCGATGCCAAGTCTTCGGCGGCGTCGTCGTCATCGTCATCGTCGTCGGCGTCGTGCTCTACCT
CPSSR_585	CAACAC	849	5|FCHL5JJBBXX_L2_wHAXPI059581-29_1_(paired)_contig_192355:190-419|+	3|LP150221_R1_(paired)_trimmed_(paired)_contig_11924:128-145|-	N/A	N/A	6|TCunknown-1_(paired)_contig_25985:502-537|+	1.25	0.4	0.94	TGGCAGCATTTTCACAAGTACACCATCCTTTTCTACTTGACTCAGTTTTCCTACAAAATACACCCATTAAGATGTATGGATTTGTTGATGAAGGTAACAT	TACCTTTTTCTCTCCATATTACACATCTGATCATCAGCATCTTGATCAGGAGACACCACCACCTGTTGATGTTGGAATTCATGAAAGTCGCAGCTGTCTT
CPSSR_586	CAAT	850	6|FCHL5JJBBXX_L2_wHAXPI059581-29_1_(paired)_contig_249960:78-301|+	5|LP150221_R1_(paired)_trimmed_(paired)_contig_23442:973-992|-	5|LP161083-1_R1_(paired)_trimmed_(paired)_contig_61001:2150-2169|+	N/A	N/A	0.47	0.4	1	CACTAACCAGAAGGGTCGGAATAGCAGAGCAAAATAGCCAGGTTGTAGAAATTGCTACCTGCATAAATAATTTAAAATTAAAATTTATCAAAACCATTTC	CACCAATGTTGTACCGTGCAAGCGAGGACATTTAAGAGAGTGATGTGACGAGGAGTGAGGTGAAGCGAGGAAGAGGGAGGAGATCCGACGACGGAGGATG
CPSSR_587	CAC	851	11|FCHL5JJBBXX_L2_wHAXPI059581-29_1_(paired)_contig_127049:90-322|+	8|LP150221_R1_(paired)_trimmed_(paired)_contig_31638:1077-1100|+	8|LP161083-1_R1_(paired)_trimmed_(paired)_contig_255783:95-118|-	N/A	N/A	1.41	0.4	0.99	GCGACCGCCATCCCGACGAACAATTCACCGGATTTTGCCCCTCATGCCTCTGCGAACGCCTCTCTGTCTTAGACCACTCCTCTTCCCTCCGCAAACCCAA	TACAACCTCCACCGCTGCCGCCGCCCTTAAAGCCATCTTCAAAGTCTCCGCCTCCACTTCCTCCTCCGCCGCTGCCGCCGCTGCCGGAGGACCTTCCGAT
CPSSR_588	CAC	852	5|FCHL5JJBBXX_L2_wHAXPI059581-29_1_(paired)_contig_116732:98-312|+	5|LP150221_R1_(paired)_trimmed_(paired)_contig_119384:269-283|-	5|LP161083-1_R1_(paired)_trimmed_(paired)_contig_14339:372-386|-	N/A	4|TCunknown-1_(paired)_contig_84475:211-222|+	0.43	0.2	0.97	AAATCACAAACAATGGCCTCGAAGCTACTCTCCACCGCCTCCACTCTCCGCCGCACAACCCCTTTCCTCCCCCACTTCTCCACCGCTACAGCCGCCGTCG	CTCCGCCACTTCCCACGGAAGACGATGCATTGGGAATCACTGTAAAAGGAGTCAAAATCTCCGGAAGACCACTCTACCTCGATATGCAAGCCACCTCCCC
CPSSR_589	CAC	853	5|FCHL5JJBBXX_L2_wHAXPI059581-29_1_(paired)_contig_148142:43-257|+	N/A	N/A	4|FCHL5H3BBXX_L3_wHAXPI062220-17_1_(paired)_contig_205736:120-131|+	6|TCunknown-1_(paired)_contig_44390:333-350|+	0.82	0.4	0.97	CCGAACTCGTCCTCTTCCCCTCTTCCTCCACCTCCGATCCCGAACCCGACTCGCCTGCTCACTCGTCCGACAACAACCCAGATGACCCACCGAGTCAACT	AGCCCAAAACCCCCAAATTCCACCGCCGCCGGCGTACGTTAGCCCTGAACCCCACATCTCCACCCAATTCTACACCTTCAACGCCGATTCTCATCTCCTC
CPSSR_590	CAC	854	5|FCHL5JJBBXX_L2_wHAXPI059581-29_1_(paired)_contig_176303:63-277|+	N/A	N/A	4|FCHL5H3BBXX_L3_wHAXPI062220-17_1_(paired)_contig_223447:564-575|-	3|TCunknown-1_(paired)_contig_89826:718-726|-	0.82	0.4	0.96	TCGGAATGGGCTAATAACTTTTTTGCATCCCTATTTGCCCTTCCATAACACAAACTCCATCCACCAAAATCAGGAAACAATCAACAACCCTCCTCTCTCT	CATCACCATGAAGCTCCACAACCAGATCGGAGAAGGACGTATAATCCTTCAATCTTCCCCCCTTCTCGCTCTGACAATCACCATCACCATGATGTACCAT
CPSSR_591	CAC	855	5|FCHL5JJBBXX_L2_wHAXPI059581-29_1_(paired)_contig_191599:94-308|+	5|LP150221_R1_(paired)_trimmed_(paired)_contig_50065:808-822|-	N/A	3|FCHL5H3BBXX_L3_wHAXPI062220-17_1_(paired)_contig_310122:338-346|-	N/A	0.94	0.4	0.99	CTACTAACCATCTTAAACACCTTGAACGAAACAGTCACCCCTCGAATTCCTCTGTCATCCGTCTCAGCCAGACACCTCTGCACCAACAACAACAAATGAT	CAGATGATTCCACTATGTATGATTTCACAGAAGAAGGATTGCGTCTGGGTCTGGCCTGGGAAAACCTTTGAATAACTGAATTCAATTTGAATTTCCAAGG
CPSSR_592	CAC	857	5|FCHL5JJBBXX_L2_wHAXPI059581-29_1_(paired)_contig_210716:331-545|+	5|LP150221_R1_(paired)_trimmed_(paired)_contig_22204:406-420|-	5|LP161083-1_R1_(paired)_trimmed_(paired)_contig_209845:858-872|-	6|FCHL5H3BBXX_L3_wHAXPI062220-17_1_(paired)_contig_114470:308-325|-	5|TCunknown-1_(paired)_contig_30825:646-660|-	0.4	0	1	AAGCAATCAGAAGATCGCCCGACCGGCTTATGGTCCCGATAAGTGTCCCTGCCACCTGAGATATGGTCCCGAGCATCCCGACCATAGCCATAGCCTGGAT	CCATCTTTGGTTGCGCCTTGTTCACAGAGATGACCTTACCATCCAACTCCCGGTCATGCATCTCCCTGATGGCTTCTTCCATGGCCCGATGATCAGCAAA
CPSSR_593	CAC	858	5|FCHL5JJBBXX_L2_wHAXPI059581-29_1_(paired)_contig_230387:21-235|+	6|LP150221_R1_(paired)_trimmed_(paired)_contig_201251:620-637|-	5|LP161083-1_R1_(paired)_trimmed_(paired)_contig_65666:200-214|-	N/A	3|TCunknown-1_(paired)_contig_122091:966-974|-	1.09	0.2	1	TACCCAAATTCTGCATCTCCCCGATACCCAGGCTCACTCCCATAACCCGACTCATTCCCATTCTGAGTATCCGAAAACCCGCCACCCAGATTCTCCTTCT	CTCCACCGTCCCTGTCCCTCCTCGTATTCCTCGCCTCGCTCACATCCGACCAATTCGCATCCCCATTCCCAAACAACTCCCCGCTCGAATCCGTCCCCGC
CPSSR_594	CAC	859	5|FCHL5JJBBXX_L2_wHAXPI059581-29_1_(paired)_contig_253172:331-545|+	5|LP150221_R1_(paired)_trimmed_(paired)_contig_8559:3941-3955|-	N/A	N/A	3|TCunknown-1_(paired)_contig_88702:862-870|-	0.94	0.4	0.99	TTTACCTAGAATGGAGGCCTAGCCCCAGTGCCGCTCCAACCAAGTACATCTCCAGGAAATGGATAATTTCCTAGGTTCGCTCCCAAATTAAAAAAGGGAA	CAGTGCTGTTACCGCTTCCTCTATCACCCATTTGGCCACCTGTCACTCCAGAAGATTGTGAGGCTGCTGGTTGCACTTGCACTGCTGCTGACTCCTCTTC
CPSSR_595	CAC	861	5|FCHL5JJBBXX_L2_wHAXPI059581-29_1_(paired)_contig_33744:437-651|+	5|LP150221_R1_(paired)_trimmed_(paired)_contig_232176:276-290|+	N/A	4|FCHL5H3BBXX_L3_wHAXPI062220-17_1_(paired)_contig_42876:325-336|-	N/A	0.47	0.4	0.99	ATGGGTACTTGCAATGAAGATTTATCATCCATTACATATTCAAAAGACCCCATTGAAAAGCACCTTCTAGCATCAGCATTATTGTCACTACTACCTTCAA	CTACATTCTTGAATTTCCCAAGCTTAACAGGCACAACTTTTCCCCCTGAACTCACTATGGCCACTGGATTGGCATCCTCTTTCGTAGGATTTTCGCATGA
CPSSR_596	CAC	862	5|FCHL5JJBBXX_L2_wHAXPI059581-29_1_(paired)_contig_68023:360-574|+	5|LP150221_R1_(paired)_trimmed_(paired)_contig_27714:1164-1178|-	N/A	8|FCHL5H3BBXX_L3_wHAXPI062220-17_1_(paired)_contig_29109:704-727|-	N/A	1.41	0.4	1	AACAACTGATTCGCTTCGGCAATCGAAAGCTCCTCCCCCAAATCCTCTTCCTTTTTCTCCACATCACCGCTCCTCACTTGCTCTTCTTTTGCAACCGCAA	TTCTCTCCGGCTTTAAAACAGAAGTCAGACAACCGCCATCGTTTCTCGCCATTGTCATCCGTTTCTCAGCAGCAGCAGCCATGAGCTCACGCTGCGACTT
CPSSR_597	CAC	865	5|FCHL5JJBBXX_L2_wHAXPI059581-29_1_(paired)_contig_98177:38-252|+	N/A	4|LP161083-1_R1_(paired)_trimmed_(paired)_contig_73653:272-283|-	4|FCHL5H3BBXX_L3_wHAXPI062220-17_1_(paired)_contig_238221:380-391|-	N/A	0.47	0.4	0.98	CCGTTGACATCGAATCCGATGAAAACCCTAACTTCCCTCGCCTCAAATCCGGCCTCCTCGTCCTCACCACCCACCGCCTCCTTTGGCTCCCTCCCGATAT	TACAACCACCGCCACGGCAGTGTTCGTCCCTCTCGCTGCAATCTCCCACATCTTCACTCCCAAGAAGTCACTCAAGACCATGTTCGCCATCGCCACTCCC
CPSSR_598	CAC	866	6|FCHL5JJBBXX_L2_wHAXPI059581-29_1_(paired)_contig_12432:171-388|+	5|LP150221_R1_(paired)_trimmed_(paired)_contig_36725:842-856|+	5|LP161083-1_R1_(paired)_trimmed_(paired)_contig_52140:339-353|+	N/A	N/A	0.47	0.4	0.99	AGCAGCCAATTCGATACTTTCCAAAACAGTTCATTTCTAGGAAATCCTGGACTATGTGGTAGCCCTTTATCAAAACAATGTGGAAATTCACATGCACTGT	CTCCTTCAACATCAGATGAGGATGAGGATTCAAAATTTCCAATGGGGTATGATTGGATATTCATAGTGGCAGGATATGGAAGTGGGCTATTAGTTGGGTT
CPSSR_599	CAC	867	6|FCHL5JJBBXX_L2_wHAXPI059581-29_1_(paired)_contig_132144:11-228|+	6|LP150221_R1_(paired)_trimmed_(paired)_contig_32301:1189-1206|+	N/A	6|FCHL5H3BBXX_L3_wHAXPI062220-17_1_(paired)_contig_144196:110-127|-	7|TCunknown-1_(paired)_contig_14687:4521-4541|-	0.43	0.2	1	AGGAGATTCTAACACCCATACTCACAGTAGTTCAGAGATTGGTGTTTCCCAACTGAGCAAACTACCATCTGATGGAAGACTGCTTGAGGAACCAAAGAAG	ATTGACCACAACATGCAAGGCATATTCTTGCACGTTTTAGCAGACACCTTGGGGAGTGTTGGGGTTGTTATATCAACCCTCTTAATTAAGTACAAGGGAT
CPSSR_600	CAC	868	6|FCHL5JJBBXX_L2_wHAXPI059581-29_1_(paired)_contig_146390:110-327|+	3|LP150221_R1_(paired)_trimmed_(paired)_contig_55525:1874-1882|+	3|LP161083-1_R1_(paired)_trimmed_(paired)_contig_217891:150-158|-	N/A	N/A	1.41	0.4	0.98	CCAAGTCCAACACAGGGATGATGATACTCTGTTGACACACAACTTCTGCTCCTGCTACCATCTTTCTTCTTCCAACTCCACAACAATCATACCACACACA	AGGGAAAATCAGATAGATACTTTGCGTTTTCTCGGGAAAATATTGAAGTCTGTTTGGCAACTGGGAAAATGGATTTGGAATTTTCTCGCACTTTTCGATT
CPSSR_601	CAC	870	6|FCHL5JJBBXX_L2_wHAXPI059581-29_1_(paired)_contig_168070:100-317|+	4|LP150221_R1_(paired)_trimmed_(paired)_contig_207239:110-121|+	3|LP161083-1_R1_(paired)_trimmed_(paired)_contig_59592:401-409|+	4|FCHL5H3BBXX_L3_wHAXPI062220-17_1_(paired)_contig_257579:725-736|-	N/A	1.09	0.2	0.97	GGGTACTGCATGTTCATCATCATCCACTGCTGCTGTTGGTACTGCTGCATCCATTGCTGCTGCTGTTGTTGCTGCTGTTGCTGTTGCTGCGGATTCAATT	CGCCGCCGCCGCCATTCGTCGTTGACTGCATGATTGATTTCTTTCTAGAAAGTTCTTCTTCTTCACCAGTCACCACCCTCCTCTCTCCTCGTTTCTCTCT
CPSSR_602	CAC	872	6|FCHL5JJBBXX_L2_wHAXPI059581-29_1_(paired)_contig_77056:269-486|+	5|LP150221_R1_(paired)_trimmed_(paired)_contig_48384:1878-1892|-	N/A	N/A	5|TCunknown-1_(paired)_contig_96264:327-341|+	0.47	0.4	0.99	ATGGGTCCATTACCCATCTCTTGTGTTCATGCAATTCACTCACTCTCCCACCTAAACCCACCACCACAACCACCACCACAACCACCGTCACCACCACCGT	TATTGATTTGGTTTGCTGATCGAACACCACCTCTTCTAATATGGCTACTACAAAATTTGGGTTCAGTCTGACTGCCCCTCGTCTCCTTTCTGCTCCTTCT
CPSSR_603	CAC	873	7|FCHL5JJBBXX_L2_wHAXPI059581-29_1_(paired)_contig_141238:380-600|+	6|LP150221_R1_(paired)_trimmed_(paired)_contig_188266:424-441|+	6|LP161083-1_R1_(paired)_trimmed_(paired)_contig_3278:234-251|-	9|FCHL5H3BBXX_L3_wHAXPI062220-17_1_(paired)_contig_284441:325-351|+	N/A	1.22	0.2	1	AATTTTAAGGTTGAAAATTTTCCGATTAGCGAAACTGGAGAGACACAGAGGAGACCGTCACTTCGAGAACCACCGTGGTGGTGTCTCCGGTGACGCTAAT	TCAAACCATCACGAACAACACCAGCACCACCACTCAAACCACTTGGACCACCATCACCATAACCAGCAAGACCACCAGTACTCCAATAATCACTATGGCC
CPSSR_604	CAC	874	7|FCHL5JJBBXX_L2_wHAXPI059581-29_1_(paired)_contig_165603:669-889|+	N/A	7|LP161083-1_R1_(paired)_trimmed_(paired)_contig_110962:490-510|-	6|FCHL5H3BBXX_L3_wHAXPI062220-17_1_(paired)_contig_305078:185-202|+	N/A	0.47	0.4	0.99	CCAACCACAACCGTCTTCTTACTACTCCGCACCACACATGCTGCTTGCTCTCCGAACCGGATCTTCAGGGCCGTTGGATGATGACCATGACCATGATCAT	CGCCACCCGAATGGAAATCAAACGGCGTTGGTGATGAAGAGAGAGAAAACCGGGAGTGGAAGAAAGAGGGTCCGTACCAAGTTCAGCCAGGAGCAGAAGG
CPSSR_605	CAG	876	5|FCHL5JJBBXX_L2_wHAXPI059581-29_1_(paired)_contig_10185:408-622|+	N/A	N/A	4|FCHL5H3BBXX_L3_wHAXPI062220-17_1_(paired)_contig_33141:581-592|+	3|TCunknown-1_(paired)_contig_141535:435-443|-	0.82	0.4	0.96	CAAGCAGGTTATGTGCAACAACAGAACCTCAACAACACAACAATATCCCTCCACTAAGGCGTCCAGGTCTTATGATACCTGGTACCACCTATGGCATCAA	CCCAACGCGCCGTTTCCTTCCTTTCCCAATAGACGACAAGGTCATCACCCAAGAGCACGACGTTCCCCATCTTACGGTTCCACACGACCATCTATGTCGC
CPSSR_606	CAG	877	5|FCHL5JJBBXX_L2_wHAXPI059581-29_1_(paired)_contig_13787:342-556|+	N/A	3|LP161083-1_R1_(paired)_trimmed_(paired)_contig_248606:139-147|-	3|FCHL5H3BBXX_L3_wHAXPI062220-17_1_(paired)_contig_114052:383-391|-	3|TCunknown-1_(paired)_contig_139056:533-541|+	0.87	0.2	0.99	CACTCCCCCTGGATCTATACAAGCTACTAGTCAGTCAGCAGGCCTCCCTGCTTCTCCAGCTCAGCTTGCACAACACCAACTTGCTTATCAGCATATCCAC	CAACTCCAACAACAACTCCAGAGTTTTTGGGCAAATCAGTACCAAGAAATTGAGCAGACCATTGACTTTAAGAACCATAGCTTGCCATTGGCTAGGATCA
CPSSR_607	CAG	878	5|FCHL5JJBBXX_L2_wHAXPI059581-29_1_(paired)_contig_16027:59-273|+	4|LP150221_R1_(paired)_trimmed_(paired)_contig_123499:401-412|+	4|LP161083-1_R1_(paired)_trimmed_(paired)_contig_197449:801-812|-	4|FCHL5H3BBXX_L3_wHAXPI062220-17_1_(paired)_contig_33750:477-488|-	4|TCunknown-1_(paired)_contig_28813:1238-1249|-	0.4	0	0.99	CAATTCACAACCTCAAATGTCTTTTCCGCAACAACTACCAACATTTTCCCCTCAGCCCATGTACTGTCAGTCGCAAATGCAGCCGCAGCAGCTGCAAAAT	ATGATATCTTTTGGTCCAAACCATCCCCAAGGCTTCAATTTCAATCCGTATTTAGGAGGAGAAACGGCGACATCACCGGCGACTGTGGAGCAACAGCAAC
CPSSR_608	CAG	879	5|FCHL5JJBBXX_L2_wHAXPI059581-29_1_(paired)_contig_170664:549-763|+	4|LP150221_R1_(paired)_trimmed_(paired)_contig_162994:419-430|+	4|LP161083-1_R1_(paired)_trimmed_(paired)_contig_101951:721-732|+	5|FCHL5H3BBXX_L3_wHAXPI062220-17_1_(paired)_contig_50980:145-159|+	7|TCunknown-1_(paired)_contig_3082:5182-5202|-	1.1	0	1	TTACTTACTAATTACTATGACTGGCTAATATTCTATCTGTTTTACACAATATTTGTTACTTCCAAGGCAAAAGCAATACTTTGAGCAAAGAAAACGTCAA	ACAGCTGGGTTAGAAGGCCATGCCGATGGAATAGACAGCGGGCATTGTCATAAGGAACATATGTCACTGGATATTCTCAGTTTGCTAAACTTGTCAAAAG
CPSSR_609	CAG	881	5|FCHL5JJBBXX_L2_wHAXPI059581-29_1_(paired)_contig_216334:294-508|+	5|LP150221_R1_(paired)_trimmed_(paired)_contig_98940:1641-1655|-	N/A	N/A	6|TCunknown-1_(paired)_contig_76913:247-264|-	0.47	0.4	0.99	ACCACAACCACAACCTCAGCAGCAGCAACATCCTCCTCCACCCAAAGACCATTTTGCCCTTCAACACCACCACCCTCAATTTCAGAATGCCTACCATCAT	CAAATCCCTTCCCATTTTGCCCTTCTTCACCACCAACAACAACACCAGCAGCACCAACACCAGCACCAGCATGACCTCAACTTCAGCATCCCGGTTTCTC
CPSSR_610	CAG	882	5|FCHL5JJBBXX_L2_wHAXPI059581-29_1_(paired)_contig_217505:28-242|+	4|LP150221_R1_(paired)_trimmed_(paired)_contig_186940:390-401|+	N/A	N/A	3|TCunknown-1_(paired)_contig_59189:972-980|+	0.82	0.4	0.98	GGTACAGGTGAAGAAGAAGGTGTGGAGTCGGCTGCGGCAAAAAAAAAGAAAAAGAAAAAGGAGAAGGAAAAGGAGAAGAAGGCTGCGACAGCGGTGGCGA	CTACGGCTGCGGCTGCAGAGGTAATGTTCTGACTTGACTTACCATACCATACTAAGAAAATGGTTTAACAAATGCTTGAGGTTAACCTGTTTACCTTGTA
CPSSR_611	CAG	883	5|FCHL5JJBBXX_L2_wHAXPI059581-29_1_(paired)_contig_25621:483-697|+	5|LP150221_R1_(paired)_trimmed_(paired)_contig_64443:1028-1042|-	5|LP161083-1_R1_(paired)_trimmed_(paired)_contig_75358:408-422|+	4|FCHL5H3BBXX_L3_wHAXPI062220-17_1_(paired)_contig_298070:306-317|+	N/A	0.43	0.2	0.98	CCATCATTGGACTCCTTTATTGTTTTCTTCCCCAAGCTGCCGTCCCCTTTGCCCTTTCCAGACTTCACAGCAACAGCCACAGGTTTTACCGGATCAACCA	GCTTGACCTGATCAACCTTCTTCATTCTAGGGCATTGGGCTGTCACATGTCCCTAATACGACAACCTCTGCAATATGATGGCATCTTTTCATATATTATT
CPSSR_612	CAG	884	5|FCHL5JJBBXX_L2_wHAXPI059581-29_1_(paired)_contig_70192:36-250|+	4|LP150221_R1_(paired)_trimmed_(paired)_contig_388:303-314|+	4|LP161083-1_R1_(paired)_trimmed_(paired)_contig_281009:106-117|+	6|FCHL5H3BBXX_L3_wHAXPI062220-17_1_(paired)_contig_134878:225-242|+	4|TCunknown-1_(paired)_contig_7740:1614-1625|-	0.8	0	1	ATCCAAACCCAAATTGTCATCACAGACAGACTCAGAAAATACTGAAACTAGGGTTTTGTGAATCAAGATGGCGACTCCTCAACCACAGTACAAACCAAAA	CAAGGAAGTTCGAAGACGACAGTGATGAGGAAACCAGTGTTCATAAAAGTGGATCAGCTAAAGCCAGGTACTACTGGTCACAATCTCACCGTCAAGGTCT
CPSSR_613	CAG	885	5|FCHL5JJBBXX_L2_wHAXPI059581-29_1_(paired)_contig_91817:534-748|+	N/A	3|LP161083-1_R1_(paired)_trimmed_(paired)_contig_136217:421-429|-	7|FCHL5H3BBXX_L3_wHAXPI062220-17_1_(paired)_contig_208406:411-431|-	5|TCunknown-1_(paired)_contig_42461:935-949|+	1.41	0.2	0.99	ATCACTTGGGAGTTTGCCAAGGAAGGCTAAGGTTATCGCAATTCTTACAAAATGGTAACGAGGCCCCTACGTTGGTTATTTGGGAACTCACGGGTAGCAA	CAAATGGTGCTTGGAGCACAAGGTTTCTTTAAGCGAGATGGCGACCTACAAAAATCCTATGCTGGTTGAACTCGTAAAAGGGAATAGGGATACTACCGGA
CPSSR_614	CAG	887	6|FCHL5JJBBXX_L2_wHAXPI059581-29_1_(paired)_contig_2068:1217-1434|+	6|LP150221_R1_(paired)_trimmed_(paired)_contig_216043:247-264|-	6|LP161083-1_R1_(paired)_trimmed_(paired)_contig_87761:544-561|-	2|FCHL5H3BBXX_L3_wHAXPI062220-17_1_(paired)_contig_114174:656-661|+	N/A	1.73	0.2	0.98	ATCAAAACAAAGAATCAAAGTATCATATTCAATGGGAAAAAAGTAAACAAAAAAGGAAATTATAATCATATCAAATTGCAACCTACCAAACAAAAACTAA	ATAACCACCCATATGAAAAAAGATGCATATTCAAAAGTACATACCAAAAGCTTACCAAACCTGGACAGAAACAAAAGACTTTAATTCTTCCTCTGCTCTG
CPSSR_615	CAG	888	6|FCHL5JJBBXX_L2_wHAXPI059581-29_1_(paired)_contig_89539:176-393|+	4|LP150221_R1_(paired)_trimmed_(paired)_contig_121321:258-269|+	4|LP161083-1_R1_(paired)_trimmed_(paired)_contig_45225:748-759|-	N/A	N/A	0.94	0.4	0.99	GCTTCTTCACAAGCTGCCCTTTTCATGTACACGAGTCATTTGACTCTGGTCATTCTCACCACTAATTGTGCCAGAGTAATCAGGAATGAAGCAAAAGCAT	CAACGGTGAAAGCATTCTGTATTACACGTATAATCAATTCATTCAATCAATAACCCGATGAATTTATATTTACATGCTATCTTGCTTCTGATCTTTCCCT
CPSSR_616	CAG	890	7|FCHL5JJBBXX_L2_wHAXPI059581-29_1_(paired)_contig_219546:328-548|+	5|LP150221_R1_(paired)_trimmed_(paired)_contig_11490:2607-2621|+	6|LP161083-1_R1_(paired)_trimmed_(paired)_contig_87382:894-911|+	N/A	N/A	0.82	0.4	1	AGAGTAGAAGTGTATTGGGATGTCCATGATTGGCTCTTTAGTTCCGGTCCAAGGAATGGTCTCTTCATATTCAAGCCCATTTCATCATCTTCTTCTGCAT	CATCAACGCCGTCATCGATTCCAACATCATCACTGGGGTCAATATTAATGTCAACTCAGGCAGAGAACTCTGCATCAGTCCCAGAGGAGTGTAATGCAAG
CPSSR_617	CAG	891	7|FCHL5JJBBXX_L2_wHAXPI059581-29_1_(paired)_contig_36658:630-850|+	8|LP150221_R1_(paired)_trimmed_(paired)_contig_127475:372-395|+	7|LP161083-1_R1_(paired)_trimmed_(paired)_contig_234836:706-726|-	N/A	N/A	0.47	0.4	0.99	CCGGACCCAAATCGCCGACGACTCGATCAGCTTCCAGATTGATTCGAGCTTCCGCGATCCGGCTCACCCCGTCGCGACGATTCCACTCCAGTTGTTGGAA	CATGGGGAAGATCGCCGGCACGAGAATGATGCGGCGGTGATGGCGGCGGCTATGGAGAGAGAAAACTGCGAGGAGGAAGAGGAACAGGAGTTCAGAATTT
CPSSR_618	CAG	892	9|FCHL5JJBBXX_L2_wHAXPI059581-29_1_(paired)_contig_141467:522-748|+	6|LP150221_R1_(paired)_trimmed_(paired)_contig_23605:673-690|+	N/A	N/A	9|TCunknown-1_(paired)_contig_10253:1146-1172|-	1.41	0.4	1	AAATCTCTAATCATTTTCCAAAGAACTGGGTAGTTAAGCATTTCTTCCACAATCAACCATGGTAGGAGGGAAGACTGAAGGCGTAAAATCGGGATCGAAT	GCGAGTTCATTCAAACCAGATCTACTCACCAACTACTTCTCACTCAAAACCCTAAAACTCAAAACCAAGCAACAAGAGCTCCTGATCCGAATCGCGATCC
CPSSR_619	CAT	893	5|FCHL5JJBBXX_L2_wHAXPI059581-29_1_(paired)_contig_106851:295-509|+	4|LP150221_R1_(paired)_trimmed_(paired)_contig_145312:1095-1106|-	N/A	4|FCHL5H3BBXX_L3_wHAXPI062220-17_1_(paired)_contig_19607:680-691|-	N/A	0.47	0.4	0.99	AGTGATGAAGTGGTGTGGCCTTTCAACAAAACAGGAAGTTATGAGGTGAAGAGCGGGTACCACTTCGCAATATCCAAGCGAAGAGGTATCCAAACTTATC	CCTTTACTGTCCCACCAGAGCTATGGAGTCTGATTTGGAAGTGCCAATCTATCCCTAAGGTGAAGAATTTTTTGTGGAGATGCTGCTCAAATGCAGTCCC
CPSSR_620	CAT	894	5|FCHL5JJBBXX_L2_wHAXPI059581-29_1_(paired)_contig_129881:3-217|+	5|LP150221_R1_(paired)_trimmed_(paired)_contig_90857:804-818|-	5|LP161083-1_R1_(paired)_trimmed_(paired)_contig_33584:264-278|+	4|FCHL5H3BBXX_L3_wHAXPI062220-17_1_(paired)_contig_33523:450-461|-	N/A	0.43	0.2	0.99	GATACAAATTAGTTCATCATCCAAACCTCTCTTTTGTAAAAGGGAATTATATACCACTTGGTCAATAATTGATCAACACATTAAAAAATATAATTGTCAC	TATTTCATGTGCTTTTGTTTTTCCGCTAATGAGATATTTGCGTCTCTTAAGATACCTAACTAATCTCTTATCTCGAGACAAATGTGTCCATATTATACGC
CPSSR_621	CAT	897	5|FCHL5JJBBXX_L2_wHAXPI059581-29_1_(paired)_contig_179407:326-540|+	4|LP150221_R1_(paired)_trimmed_(paired)_contig_140853:276-287|-	N/A	N/A	5|TCunknown-1_(paired)_contig_118831:128-142|-	0.47	0.4	1	TGGGAAGCTCTCGACACTCTAGTAATCGAATTTGCCAAATCCGAGAACTTAATCGAGGACCCGTTAGTTTCTTCACCGTCGTCTTCTCCATCGTCTTCAC	CGTTGTCGTTGTCGTTGTCGTCGTCATCTTCGTCTTATCATTTGCGATTGGTCATTCGCAAAATCAGACGATTTTTGGAGATCGGTGACATTGATGGCGC
CPSSR_622	CAT	898	5|FCHL5JJBBXX_L2_wHAXPI059581-29_1_(paired)_contig_197456:21-235|+	N/A	N/A	4|FCHL5H3BBXX_L3_wHAXPI062220-17_1_(paired)_contig_31253:278-289|+	3|TCunknown-1_(paired)_contig_98786:535-543|+	0.82	0.4	0.97	ATGTGAACATTAGGGTTAGGTACCATAAATTTAGGGATGACCAAACTCAATTGGGTTGGTAAATAAGGCCAAATGCCCCAATTTTTGACTTCTGGTTAAG	CACCACCACCACCATGCACCACCACCTCAGGTGGTGCTTTCATAAGCATGTCTGTGCAGTTAAGTCATCCATCCTCTAGTGCATGCCTGGTCACATCAGG
CPSSR_623	CAT	900	5|FCHL5JJBBXX_L2_wHAXPI059581-29_1_(paired)_contig_231237:367-581|+	4|LP150221_R1_(paired)_trimmed_(paired)_contig_189564:138-149|-	4|LP161083-1_R1_(paired)_trimmed_(paired)_contig_93894:1948-1959|+	5|FCHL5H3BBXX_L3_wHAXPI062220-17_1_(paired)_contig_120036:106-120|+	6|TCunknown-1_(paired)_contig_104715:159-176|+	0.75	0	0.98	GGTTTTTCAATTTCATCCCAATCCAATTTTCTCTGAAATTTTCTCGGGAAAGTGATGGAAAAACCAGCACTCCCAAACACTCTTTCATCAACACCACCAA	CACAAGCTCAACCAACAAAAAAGGGCAAAGAAACCAACAACGCAGCACAACAACAGAAAAGAAAGCTCCCAACAGCACAAGACCTAATCTCGCACTACGA
CPSSR_624	CAT	901	5|FCHL5JJBBXX_L2_wHAXPI059581-29_1_(paired)_contig_27260:418-632|+	6|LP150221_R1_(paired)_trimmed_(paired)_contig_19689:177-194|+	5|LP161083-1_R1_(paired)_trimmed_(paired)_contig_77629:1006-1020|-	5|FCHL5H3BBXX_L3_wHAXPI062220-17_1_(paired)_contig_31833:1653-1667|-	5|TCunknown-1_(paired)_contig_2721:1547-1561|+	0.4	0	1	TATTCCTGTTCATTGTGTATCAGCTACTTATGTGCCTAAGACTGTTCTGAGTAAGCTCAATTCTATCACTGCTAACTTTGTATGGAATGACAGAACTGTG	TGGGTGGCTTATCCTAAGTTGTGTGCTCCTTTGGAGGAGGGGGGTCTTGGTTTGAGAAGTATTCATGATATTTCTTCTGCCTTTAGAATTAAGCATGGTT
CPSSR_625	CAT	902	5|FCHL5JJBBXX_L2_wHAXPI059581-29_1_(paired)_contig_289551:26-240|+	6|LP150221_R1_(paired)_trimmed_(paired)_contig_126102:187-204|+	6|LP161083-1_R1_(paired)_trimmed_(paired)_contig_178789:436-453|-	5|FCHL5H3BBXX_L3_wHAXPI062220-17_1_(paired)_contig_335855:222-236|+	N/A	0.5	0.2	0.99	CTCGCAGTCCGTGCCGTTGGGTCTCCAAGATCCTTCTGTGGTGCAATCTCCACCGTTCTCAACCTCCACGAACAGAGACTCCATGGAAGGAGCTTTCTTC	CTCAAAGCTTCTCTACAGCTGCTGCTGTCGCTAAGAAGTCGAGTTCCGATGAGAGTCTCCTTCGAATCATTGACTCCGAGATCAATCAAGTTCAGGAAAA
CPSSR_626	CAT	903	5|FCHL5JJBBXX_L2_wHAXPI059581-29_1_(paired)_contig_40551:738-952|+	N/A	4|LP161083-1_R1_(paired)_trimmed_(paired)_contig_55850:275-286|-	5|FCHL5H3BBXX_L3_wHAXPI062220-17_1_(paired)_contig_95088:500-514|-	N/A	0.47	0.4	0.98	TTAGCTACCACATTTTCACAACTGCCAGGATCAATTACCAACTTGCAAACCTTGACGCCAACCGTACAAGTGGATTGAAACACGTTGTTCCGCAGCCATC	CCGTCTCAGGGGAAGTCTCACAAGGTGTGAGGCAAACCCGTCGCATAACTAACATCGGACCCTTGTCTCCCACCACGAGCTCCTCATCTGAATCATTATC
CPSSR_627	CAT	904	6|FCHL5JJBBXX_L2_wHAXPI059581-29_1_(paired)_contig_105406:127-344|+	N/A	N/A	4|FCHL5H3BBXX_L3_wHAXPI062220-17_1_(paired)_contig_29051:97-108|+	5|TCunknown-1_(paired)_contig_95517:542-556|-	0.82	0.4	0.98	CCAAGCTATGGAACTCAAATCAACCCAACAAAATCAAGGGTAATGACAGTATCATGTTCTTCATCCAACAAAACTGAACAAGACCAACAACAGTCCTCAC	CCCCACTCCAGGGCTTCTCCGCCGCACTCGCACTCTCCTCCATCCTCCTTTCCTCGGCCGCGGCGCCAGTACTGCCAGCTTCCGCCGACATCGCAGGGCT
CPSSR_628	CAT	908	7|FCHL5JJBBXX_L2_wHAXPI059581-29_1_(paired)_contig_15187:1271-1491|+	6|LP150221_R1_(paired)_trimmed_(paired)_contig_45059:1550-1567|+	6|LP161083-1_R1_(paired)_trimmed_(paired)_contig_194943:210-227|+	7|FCHL5H3BBXX_L3_wHAXPI062220-17_1_(paired)_contig_8117:759-779|-	N/A	0.5	0.2	0.99	CAACAACAGATGACGAGTCCGACTCGCTCAGAGTTTGAGCAGCCGAGTTCAACACAGCACCACCCGAGTTGAATCGTACTGGGAAACTCTGACCCGCCGG	CTCCGACCTTCGAAACCCGTCCGAAAAAAATACCGGCCGAGCGATCTGCAAACCTCCCATCGCCATCGCCGTCGCCGCCGTCACAGCCGTAAAATGCTGC
CPSSR_629	CAT	909	7|FCHL5JJBBXX_L2_wHAXPI059581-29_1_(paired)_contig_193014:56-276|+	6|LP150221_R1_(paired)_trimmed_(paired)_contig_3520:986-1003|+	6|LP161083-1_R1_(paired)_trimmed_(paired)_contig_116849:801-818|-	N/A	N/A	0.47	0.4	0.98	TTTAGACTAAAAACCTTACTTAAATGTTTCTCGGATGCCTTAACAACTTTATAATCATCATGTACCGAATCATAACCAAAATCCGTCATAATCCCATAAC	CTTTAGGCAATATCTTGTGTTGTTTAATAGATGGGTTCCATATTACAATTTCCCTTTCAAGCTGAACACATAATATACCATTGCAGGAACCGCAAATTTC
CPSSR_630	CCA	912	5|FCHL5JJBBXX_L2_wHAXPI059581-29_1_(paired)_contig_133306:416-630|+	4|LP150221_R1_(paired)_trimmed_(paired)_contig_65971:1845-1856|+	4|LP161083-1_R1_(paired)_trimmed_(paired)_contig_282728:214-225|+	N/A	N/A	0.47	0.4	1	ATTTTGATCAAATTTTGAATAGTTCTTCGCCCGAAAGTCTTTTCCAGGCTTCGCTATACTCACCCCGTTCGATAACCTAATCCGAAACCCACTTCCACTT	CTACTACCACCAACCCCATTACTGGTCGACCCATAAACGCTCCGACTGCTACGGCCATTCTTTACACCATTCTGATACATAATTGGATCATAATCATCCA
CPSSR_631	CCA	913	5|FCHL5JJBBXX_L2_wHAXPI059581-29_1_(paired)_contig_144238:391-605|+	3|LP150221_R1_(paired)_trimmed_(paired)_contig_34009:390-398|+	N/A	3|FCHL5H3BBXX_L3_wHAXPI062220-17_1_(paired)_contig_204403:213-221|+	3|TCunknown-1_(paired)_contig_25025:1706-1714|+	0.87	0.2	0.98	ACCACCATTGCTGGAATCTGCAATCCTCCAAGTTTTTTTGGGGTTCTGTCTAAGACCATAAGCAGAATGATCAATATCATCAATCTCTATCTCACAATCT	TTTTCCACCATATTTGGGTGGTCAGTTTCAACCTCTGCTGCATCAGCAGAATTCAGTATCACATGAGACCTCATGTGACCACCCAATGACCTCCCACATG
CPSSR_632	CCA	914	5|FCHL5JJBBXX_L2_wHAXPI059581-29_1_(paired)_contig_154684:69-283|+	4|LP150221_R1_(paired)_trimmed_(paired)_contig_39892:2230-2241|-	N/A	4|FCHL5H3BBXX_L3_wHAXPI062220-17_1_(paired)_contig_203849:215-226|-	4|TCunknown-1_(paired)_contig_54273:1134-1145|+	0.43	0.2	0.99	ATAAAACATCCATAGTTTTGAGCTTGCCTTGGCTATGGTGTAAGGTGATTGCTGAGCATTCACCCTTAAAGGGGCTCTACGAACTGTTCCTGCCATTCTT	AGAGACCCACCACGTACAGGCCCTCGGCCACGGCGAGCCCTACCACGCCCTCTAAATCTCTCCGTATTATTCCTGCTCTTCTTTATTATATCATCAAGCG
CPSSR_633	CCA	915	5|FCHL5JJBBXX_L2_wHAXPI059581-29_1_(paired)_contig_161080:428-642|+	5|LP150221_R1_(paired)_trimmed_(paired)_contig_80740:675-689|-	5|LP161083-1_R1_(paired)_trimmed_(paired)_contig_30841:586-600|+	N/A	8|TCunknown-1_(paired)_contig_83798:328-351|-	1.3	0.2	1	ATTACAACCATCACCTTAATTTCCCCTTTTGCCCCTCCAATCAACACCCTTGCTCGCCCTCGCCGCCTGCATCTCTTCACCACCGCCGCCGCGGACGCCG	TCACCTCCATCACAGTTGACTCGTGCTAACTTCTCAGTTCTATGTGTAGCAGAATAAGGAAGATTGTAGGGTTTCTGTCTTCTGGACTCATCCTCGAGGC
CPSSR_634	CCA	916	5|FCHL5JJBBXX_L2_wHAXPI059581-29_1_(paired)_contig_170826:100-314|+	6|LP150221_R1_(paired)_trimmed_(paired)_contig_105556:330-347|-	3|LP161083-1_R1_(paired)_trimmed_(paired)_contig_193299:1461-1469|-	5|FCHL5H3BBXX_L3_wHAXPI062220-17_1_(paired)_contig_172488:385-399|-	N/A	1.09	0.2	0.99	CATCTCGTAAAACAAGAACCAAGACTCGTAAACCCAAGTTCCTCAGTCTCCTCCGACTTGACTCCTCGCCGGAAACCTCCCAACAATCCGGCGAAATGAC	TCAACTGAACCTATTTCCGTTACACCCAGAAAATCTAGTAGAAGACAAAGACTTACACGACGAGAACAACATGGCGTACCTCTTCTCCACCTCCGACGAC
CPSSR_635	CCA	918	5|FCHL5JJBBXX_L2_wHAXPI059581-29_1_(paired)_contig_5335:2889-3103|+	5|LP150221_R1_(paired)_trimmed_(paired)_contig_4435:4740-4754|+	5|LP161083-1_R1_(paired)_trimmed_(paired)_contig_130300:411-425|-	8|FCHL5H3BBXX_L3_wHAXPI062220-17_1_(paired)_contig_87283:261-284|+	N/A	1.3	0.2	0.99	TACACCAAACGATAGCAACGACACATTCCCATGTCGTCTCTGTAACCCAACTCTTCCTATAAAAGGCCTCGTCGTAGAACACGCCATTGACGACAACGAC	CCGTGTCCAATGCTCCTCTTCGAACGCTTCGAATACGAACAACGACAAGTAACAGAAGAAGATTTTGTGTTTGTTATTGTGAAGAGAGAGGAGAGAGAGT
CPSSR_636	CCA	919	5|FCHL5JJBBXX_L2_wHAXPI059581-29_1_(paired)_contig_92143:431-645|+	5|LP150221_R1_(paired)_trimmed_(paired)_contig_203356:266-280|+	N/A	N/A	4|TCunknown-1_(paired)_contig_27145:693-704|-	0.47	0.4	0.98	GGCTAAATGTTTCTAAAAAATGCCATAAATGCCTATAGTAAGTTAAAATGAAGTACCTGGTAGAGATGTGGGCAAGTGAGAAACAAGGTTACTAATGATG	TTCTCTTCTGTCTTCACTTGTTTACTTTCTCCAACAACCACCTTTACTTCCTCTTTTCCATGTTCATTTTTCTCACCTCCTTCACCTTCACTTTGATGGA
CPSSR_637	CCA	923	6|FCHL5JJBBXX_L2_wHAXPI059581-29_1_(paired)_contig_172923:211-428|+	9|LP150221_R1_(paired)_trimmed_(paired)_contig_163073:330-356|-	7|LP161083-1_R1_(paired)_trimmed_(paired)_contig_186163:513-533|+	N/A	N/A	1.25	0.4	1	TCTTTCAGTAGCTGGATTGCATGGAAAAAGAGGGGACACAATTGTATGGTGTTTATACTATACACACTAGTACTACACTACTTTCTATGCCTCTCTCTCC	ATCCACCATGCCTTCTTTTGCAAGCTTTTCTATCTTTTCTTTCTCTGTCTAATGCTAATGGCTATTGATTCTTCTCTTAAAACTTATAAATTGGAAATTA
CPSSR_638	CCA	924	6|FCHL5JJBBXX_L2_wHAXPI059581-29_1_(paired)_contig_205196:435-652|+	7|LP150221_R1_(paired)_trimmed_(paired)_contig_82811:441-461|+	7|LP161083-1_R1_(paired)_trimmed_(paired)_contig_165726:576-596|+	N/A	N/A	0.47	0.4	0.98	TTTGGCTTATATAATAAATTGCTACATATGTGTGTAGTATTTATATAAGATGCATTTATACAAACACTGACTACCTCGAACTCCTCCTTCGTCTCTTTCC	TTCTACACGTCACATATCTGTTACACTTTTTTCAGTTTCGTTTGATTCTTCGTCAATTGCATCATCACTTCAATCTCCTTTTAGCCTTTTCTAACTTTTG
CPSSR_639	CCA	925	6|FCHL5JJBBXX_L2_wHAXPI059581-29_1_(paired)_contig_217078:431-648|+	4|LP150221_R1_(paired)_trimmed_(paired)_contig_13320:1867-1878|+	4|LP161083-1_R1_(paired)_trimmed_(paired)_contig_184079:174-185|-	N/A	N/A	0.94	0.4	0.96	CTGGACATCGTCGCGTGCACCACCAGCTTTGGTCCTTCTTCCGCTACCAAGTCCATCGACCATGGTAAGAATGCGCCAGGTGCGCAGGATAATACCACCG	AGACCACCGCCGCCACCAAGAAATCCACCAAGGCATCTCAGGCCGCCGCCATCGCCGCTACCGCCGCCACTAGCAACAACAAGCTGTCGTCATCTCCGTC
CPSSR_640	CCA	926	6|FCHL5JJBBXX_L2_wHAXPI059581-29_1_(paired)_contig_238465:25-242|+	6|LP150221_R1_(paired)_trimmed_(paired)_contig_40483:993-1010|+	5|LP161083-1_R1_(paired)_trimmed_(paired)_contig_56209:1028-1042|+	N/A	6|TCunknown-1_(paired)_contig_73929:1200-1217|-	0.43	0.2	0.99	TAGCCTTAAAACCTGTGTCTGATAATAACTAACCAGACTTTAACCACATATGTCCTCTTCCGCCTCTCCGGTCACCGCCGACGGCGACGACCCATCTGAC	CTACTCATTCCTTCTCTTCCAAATGACGTCGCATTACAATGTCTCGCCCGAACCCCACGACTCCACCACCCAACCCTCGCACTCGTGTCCAAATCATGGC
CPSSR_641	CCA	927	6|FCHL5JJBBXX_L2_wHAXPI059581-29_1_(paired)_contig_263817:261-478|+	5|LP150221_R1_(paired)_trimmed_(paired)_contig_154826:657-671|+	5|LP161083-1_R1_(paired)_trimmed_(paired)_contig_137335:263-277|+	N/A	N/A	0.47	0.4	0.99	AAGTTGAGGAAGCAAAGCATGGAGATTAGAAAACATGTTCCTCATCTTTTTTCTCCTTTCTCTTTCTGTCCATATATGTATCTCATGATCTGACGACTCG	CCTTTTTTCCCTACCTTAACCTCACCACCACTTGCCTTATTACCACCGCTTCGGCCTCGCTTCTTACCCACCATCCCCACCTCCTCTTTTTCTCCTACCG
CPSSR_642	CCA	928	7|FCHL5JJBBXX_L2_wHAXPI059581-29_1_(paired)_contig_104325:638-858|+	7|LP150221_R1_(paired)_trimmed_(paired)_contig_80760:1219-1239|+	7|LP161083-1_R1_(paired)_trimmed_(paired)_contig_114074:868-888|+	5|FCHL5H3BBXX_L3_wHAXPI062220-17_1_(paired)_contig_307865:207-221|-	N/A	0.87	0.2	0.99	CCGCCGCCGATCTCAAACATATATGCTTCTGCTGCTGTTGCAACAAAGCCAGTTTGGCTGTCATCAGACTGAACCTCCACAGTTTCGCCACTCCCATTTC	AATCTCATGATTTCATATACACAAATACATTTACATGCAAACCCACTTCATAGAAAAAGCTCTCTGTAGTCAGAATGTGAGTTAGATGCTATAGTGTATA
CPSSR_643	CCA	929	7|FCHL5JJBBXX_L2_wHAXPI059581-29_1_(paired)_contig_140098:703-923|+	7|LP150221_R1_(paired)_trimmed_(paired)_contig_10965:3834-3854|-	8|LP161083-1_R1_(paired)_trimmed_(paired)_contig_89879:124-147|+	N/A	6|TCunknown-1_(paired)_contig_39522:109-126|+	0.71	0.2	0.99	ACTCCTCATCGTCTTCGCCGCCGCCATTCTCACCTGTCGGACCTCACTCCGCCGCGGATTCAACTCATTCCAGCTCGAATCAGACGCCTTTATAAAACAG	GTGCCGGTGGTTTTCAACACGACGCTAATCAAATTCGCGGAGGTCGAAATAGGCGAGGCGAAATCGAAGCAAGAGATCGAGCAGTTGCTGGAAGGCAATT
CPSSR_644	CCA	930	7|FCHL5JJBBXX_L2_wHAXPI059581-29_1_(paired)_contig_54863:180-400|+	9|LP150221_R1_(paired)_trimmed_(paired)_contig_13951:361-387|+	9|LP161083-1_R1_(paired)_trimmed_(paired)_contig_9733:626-652|+	N/A	N/A	0.94	0.4	1	GTTTCTCTTTCTCCTGTGAACACACTCACTCACCAGTCACCACCATTGTATCCCACTGCTTTGAACACAGCAAAGCTCCTTCAGAAATGGAACCTCACGG	CAACCACCAACACGACGACCAAACTCAATCTCCAACCACCATTACCACCCCTAAATGCCTCGCTTGCGGCGCTGGCGCAGCTTATCAACCACCACCAACA
CPSSR_645	CCA	931	7|FCHL5JJBBXX_L2_wHAXPI059581-29_1_(paired)_contig_61563:273-493|+	6|LP150221_R1_(paired)_trimmed_(paired)_contig_157501:1651-1668|-	N/A	8|FCHL5H3BBXX_L3_wHAXPI062220-17_1_(paired)_contig_276869:132-155|-	N/A	0.82	0.4	0.99	ATTCACACCAAGTGACAAACCTCCCATACCACCATGAGAGAAAGCCATCTCGTTCACCGACTCAATCGAATGCCCCGCCCCACCAGCCGTCGCAAACTCT	GTGAGCTGGGTCGTCGTCCTGGTAATCGAACCCGAATCATCAACCTCCGAACCGGAGTTAGTCGAAAAGGCGGCTTGAATCCCAGCTATTGCTTTCAGGT
CPSSR_646	CCA	932	8|FCHL5JJBBXX_L2_wHAXPI059581-29_1_(paired)_contig_272442:425-648|+	5|LP150221_R1_(paired)_trimmed_(paired)_contig_74083:3277-3291|-	5|LP161083-1_R1_(paired)_trimmed_(paired)_contig_105893:401-415|+	N/A	5|TCunknown-1_(paired)_contig_60420:1828-1842|+	1.3	0.2	1	GATCCCTTTCTCGCCTGCAAACAATGTCACCCTCCTTGGTGATGCCCATTTCAAGAACAACACCATTAATCTCACTCAAGAACTCAACTGTCTCTCATCT	TCACCAGACCCAAAAAAGCAACCGTATGTTGGATTTGGAAGAGCTTTCTACATCTACCCAATTCGCTTTCTTGATTCTGCAACCAACAACACAGCCTCTT
CPSSR_647	CCCAA	933	5|FCHL5JJBBXX_L2_wHAXPI059581-29_1_(paired)_contig_111422:237-461|+	4|LP150221_R1_(paired)_trimmed_(paired)_contig_63797:243-262|+	N/A	4|FCHL5H3BBXX_L3_wHAXPI062220-17_1_(paired)_contig_315520:222-241|+	4|TCunknown-1_(paired)_contig_53963:342-361|-	0.43	0.2	0.99	GAGAAGGTGGGTCACCTTATGATTTTATGATCGCATGGGTTGGCTGGGTTTTTCATGGTTATTTTCCAACCCAACCCAAGTTAAAGCTAATTTAAATCAG	CTTTGGGTTAGTCATGAGTTGAGCATGGGTTGTGTGCTGAACTTGCAGCCCTACACTGCGGTGGTAGGTGGGTGGGTCTTGTGGTAGTGGTACGAGGTTC
CPSSR_648	CCG	935	5|FCHL5JJBBXX_L2_wHAXPI059581-29_1_(paired)_contig_125273:1005-1219|+	5|LP150221_R1_(paired)_trimmed_(paired)_contig_4447:3246-3260|+	5|LP161083-1_R1_(paired)_trimmed_(paired)_contig_33479:219-233|-	N/A	3|TCunknown-1_(paired)_contig_44979:2654-2662|+	0.87	0.2	0.98	GATCATACATAATTGTATAAACAGCTACAAATTTCAGGAAAAAAAATAAATGATAAAACTGAAGTCCAAATTAAAACACTATTGATTCTCACCATTATAT	CCAGAATTAAAACGCACCAAGCTCTCTTCAGCAATCTCTTTATTGATGCTGGAAGGAAACCTACAAAAACCTTGCACATCCGATCGCAAGGGGTCATACG
CPSSR_649	CCG	936	5|FCHL5JJBBXX_L2_wHAXPI059581-29_1_(paired)_contig_34697:18-232|+	4|LP150221_R1_(paired)_trimmed_(paired)_contig_209589:416-427|+	2|LP161083-1_R1_(paired)_trimmed_(paired)_contig_45676:406-411|+	N/A	N/A	1.25	0.4	0.99	CTCATTCGAAGAATCTAGACCGTATCTCCGACCAAATACAGAGCACATCATGTTATTAAGCGACGCCGATTTCAAAACCGTACGAACCGTACACATCATT	CCATGTTCCCTCAACACTGACACCACCATTTGAGAGGCAATCTCCAGCCGTTGATTCTCTGATGCTTTGATCTGTTTCGGACAGAAGAGATGAGTGGCCG
CPSSR_650	CCG	937	5|FCHL5JJBBXX_L2_wHAXPI059581-29_1_(paired)_contig_55709:347-561|+	3|LP150221_R1_(paired)_trimmed_(paired)_contig_30509:751-759|-	N/A	4|FCHL5H3BBXX_L3_wHAXPI062220-17_1_(paired)_contig_62245:1155-1166|-	N/A	0.82	0.4	0.97	TCCCCACATACTGAATCTCCAAATTCTCTTTTTAAATTCCCACGCAAAGCCCCCTCACTCCTCCGCCATTTCCCGACATTTCCAAGTTCAACTCCTCCGC	AAACTCGCCGGAAAATTCACGCTTTGTGCACGACAATGGCAACTACTACGACGTCGTTTGCAGGCGTCAACCTTCGTCTTCCTCACAGAAACGCCTTGTT
CPSSR_651	CCG	938	5|FCHL5JJBBXX_L2_wHAXPI059581-29_1_(paired)_contig_93052:115-329|+	3|LP150221_R1_(paired)_trimmed_(paired)_contig_57957:657-665|-	3|LP161083-1_R1_(paired)_trimmed_(paired)_contig_129282:286-294|-	N/A	4|TCunknown-1_(paired)_contig_13925:1084-1095|+	0.83	0.2	0.98	GTGTCAGTCTGTTGACTGTTATCTGCCATGGCAGATTCACCCCAGTTCTCAAAATGTCCGTTTCCCAACGCACCACCACCACAAGCCACCGTCACAGCTC	CAGTGGTTCCCTTTTGGAACATGTATTGCCCTGTGTCCACCACCCCTGTTCCTGATAAAGCTATATCTGAAGTAGCAATGTTCTTTACCCCCAACAAAAA
CPSSR_652	CCT	941	5|FCHL5JJBBXX_L2_wHAXPI059581-29_1_(paired)_contig_116624:308-522|+	5|LP150221_R1_(paired)_trimmed_(paired)_contig_247786:169-183|+	5|LP161083-1_R1_(paired)_trimmed_(paired)_contig_177019:300-314|+	4|FCHL5H3BBXX_L3_wHAXPI062220-17_1_(paired)_contig_79032:277-288|-	N/A	0.43	0.2	0.95	GCTGTACCCTCCGCCGCCACCACCATCGCTGCCTCCATAACCACCTCCCCCGTTACCTCCATATCCTCCTCCACCACCTCCTCCGTATCTACCACCTCCA	CCATAACCGCCACCACCGTAGGCGGGCGGAGGAGCAGATTTGTCGCCTTCCTGTCCGTACATCCCAGAAACTTTCTAGGGTTTTTCCAAGACTTCTCCCA
CPSSR_653	CCT	942	5|FCHL5JJBBXX_L2_wHAXPI059581-29_1_(paired)_contig_190557:210-424|+	4|LP150221_R1_(paired)_trimmed_(paired)_contig_56671:1054-1065|+	N/A	5|FCHL5H3BBXX_L3_wHAXPI062220-17_1_(paired)_contig_70008:792-806|+	7|TCunknown-1_(paired)_contig_86353:650-670|-	1.09	0.2	0.99	TGGTGTAGATGAAGTGGAGTGGTTGGGGATTGAATTTGGGCCATGGTTGACGATGATATCCCTATTTGTAGTAGTAGCCAAAGAAGAAGAGTTTGAGCAA	CCATTGTTACAACTGTTGTCCATTATCGTAGTTCTACGCGAAAACCTTTGATGATATAGATCACCCGATTCGGCTTCCACTATATCGGAAGCCGTCCTCT
CPSSR_654	CCT	943	5|FCHL5JJBBXX_L2_wHAXPI059581-29_1_(paired)_contig_256587:180-394|+	4|LP150221_R1_(paired)_trimmed_(paired)_contig_123125:1359-1370|+	4|LP161083-1_R1_(paired)_trimmed_(paired)_contig_46347:589-600|+	4|FCHL5H3BBXX_L3_wHAXPI062220-17_1_(paired)_contig_265507:348-359|+	4|TCunknown-1_(paired)_contig_22961:2634-2645|+	0.4	0	1	ATGTCATTAATTCCCACACCCACATTCGAATTCGAACCATTCTCCTTCGAATCGACGCGTTGTCGATCAACCAAATCCGATGCACCACCAACACCAGATC	CTTCTATATCGCCAAATATCGATAAGGGCAAAGCTCCCTGAGGCTTAACCCACTGTTTCTTCTCCGATTCAATCCGATTCATCGCCGCAACATCAGCTCG
CPSSR_655	CCT	945	5|FCHL5JJBBXX_L2_wHAXPI059581-29_1_(paired)_contig_61614:424-638|+	N/A	N/A	6|FCHL5H3BBXX_L3_wHAXPI062220-17_1_(paired)_contig_37105:142-159|+	5|TCunknown-1_(paired)_contig_32804:2265-2279|-	0.47	0.4	0.99	AGAGTCCAAGGTTATTGACGTTGATACCAATAATATATGTATGCAGACTTAGATGCACAAGAATGAAATTGATATCACCTGGCAATCTGCCTGCTAGAAG	CAACAGTTTCCTCACAGTCACTGCCCCAGCCAAGGTTCACAGCTAGATCCTCCACTGCCACCTTGATCACATCAGTTCGAACACCTATATCAGTAGCATA
CPSSR_656	CCT	946	5|FCHL5JJBBXX_L2_wHAXPI059581-29_1_(paired)_contig_84789:516-730|+	2|LP150221_R1_(paired)_trimmed_(paired)_contig_72233:2348-2353|+	N/A	4|FCHL5H3BBXX_L3_wHAXPI062220-17_1_(paired)_contig_227829:896-907|+	2|TCunknown-1_(paired)_contig_3866:1417-1422|+	1.3	0.2	0.96	AAGACAAGGTTTCCACCCAAACCCAGAAACAGAGTCATCAGACCCCAAACATATATCACTCACCGAGCAGCTTCGTCGGTGGGAGAGGCCATTTACGGAC	CCCCAGTCACCATACGGAGGTAAAAACATGGCGTCGCCGCCGCAATTCCCATTTGGGCTCGACGCCAATTCTTGCTGCTGGTAGAACAATTCAGGGGATT
CPSSR_657	CCT	947	5|FCHL5JJBBXX_L2_wHAXPI059581-29_1_(paired)_contig_86424:16-230|+	N/A	N/A	3|FCHL5H3BBXX_L3_wHAXPI062220-17_1_(paired)_contig_107476:382-390|+	5|TCunknown-1_(paired)_contig_148091:819-833|-	0.94	0.4	0.98	CAATTGTGAACTTCCGGTGGAGTTCCCAATCATGGGGCTCCACCTGGTCATTCCTTTTCACCTCCATCACCCTCTACCTCACCTTATCAATCTTCCTCCA	CTTCCGCCTCCACCGTCCAATCCCTCTCGGACCCATCCCTGCCGTCCATAGCCTTTCTATGTCCCTCCTCTCTGCCACCATCTTCGCCGGCATACTCTTC
CPSSR_658	CCT	948	6|FCHL5JJBBXX_L2_wHAXPI059581-29_1_(paired)_contig_128226:395-612|+	3|LP150221_R1_(paired)_trimmed_(paired)_contig_152643:707-715|-	N/A	6|FCHL5H3BBXX_L3_wHAXPI062220-17_1_(paired)_contig_220798:373-390|-	N/A	1.41	0.4	0.98	AGAGAATAGAAGAGAAGAGGGAGAATCACACTGAGAATAGCTATGACGAGTTGCAGTTGCAGACCATCCTTCTTTTGGGCATCATCTTCTTCTTCTTCAA	CCACTCGTATCAGTAGTAGTAGCAGTCGTATTACTAAGAGGACCTTTGTCGCGTTGGGTATTCGTCCCCTCGCCGCCAGTCATGGTCGTCAATTTCAACA
CPSSR_659	CCT	949	6|FCHL5JJBBXX_L2_wHAXPI059581-29_1_(paired)_contig_137974:408-625|+	5|LP150221_R1_(paired)_trimmed_(paired)_contig_165114:642-656|-	N/A	6|FCHL5H3BBXX_L3_wHAXPI062220-17_1_(paired)_contig_135870:514-531|-	6|TCunknown-1_(paired)_contig_61164:320-337|-	0.43	0.2	0.99	CCCTATCGTCACCAAAGTTCCACTTCACCAACTCTTTCCAAAGACACTCCCTATCCCTCCCATATCCCCAAAACAACTTACCAAGAAGAGCTTTTTAAAA	AGGTTGGGTGACTTGGCTCCACTCAAACACAAGAAGTTTGTTTCCCTCCCCACTTCCAGTCCAAGGAAGCCTCCTCATGTTGACCTCCAACCTAACCCTT
CPSSR_660	CCT	950	6|FCHL5JJBBXX_L2_wHAXPI059581-29_1_(paired)_contig_221361:392-609|+	7|LP150221_R1_(paired)_trimmed_(paired)_contig_11771:588-608|-	N/A	6|FCHL5H3BBXX_L3_wHAXPI062220-17_1_(paired)_contig_76974:1102-1119|+	7|TCunknown-1_(paired)_contig_46677:521-541|+	0.5	0.2	0.99	CAATTCTTAACGATCTTCATCTTCATCAGACGGTCCTGAATCGGCAACTTCTGTCTCAAAACCCTAACAATCCTGACCATCTCGTCGTTCCTCCGATCAC	CGGGATCATCGAACCCGTACACCGGCGGTGCAGGCGCATCATCAGGACACTTGCTCTTCAACATCTCCTTCAACCTCTCGTCGAACCCTCCACTGTTCCT
CPSSR_661	CCT	951	6|FCHL5JJBBXX_L2_wHAXPI059581-29_1_(paired)_contig_92613:146-363|+	5|LP150221_R1_(paired)_trimmed_(paired)_contig_128015:2769-2783|+	5|LP161083-1_R1_(paired)_trimmed_(paired)_contig_29906:1194-1208|+	N/A	N/A	0.47	0.4	0.99	ATCACATCAAAAATCATCGTCCTCTACAAGATCGCCAACAACGACGACGACGCGTAAGTTCGTTGTCCGTCCGATTAAAGCTTCGGTGTCTGAGAAATTA	GCTGCTGTTTCTGTAACTCCGGCGCCGGAGATGAAACCGGTGAAACTTCCGATCAGGAAGATTCCGGGAGATTGTGGTCTTCCATTCATCGGACCGATCA
CPSSR_662	CCT	952	7|FCHL5JJBBXX_L2_wHAXPI059581-29_1_(paired)_contig_165507:509-729|+	6|LP150221_R1_(paired)_trimmed_(paired)_contig_100033:1127-1144|-	6|LP161083-1_R1_(paired)_trimmed_(paired)_contig_58832:930-947|-	6|FCHL5H3BBXX_L3_wHAXPI062220-17_1_(paired)_contig_276895:640-657|+	N/A	0.43	0.2	0.99	CCCTTTGCTCAAATAAATCTGACCCAACACCACATGTGGCTCCCCAACAAATGGGTTCTTCTCAATAGCACCTACCAACAACTCCTCAGCTCTCTCCAAC	GTCTTTGACACATTTCCACAAACACCTTCCCAGTACATTTCCCTTGCTGCTATCTGCTCCCCTGCGTTCAAAACCTTTGTGCAATTTTCAAACACTGGTG
CPSSR_663	CCT	953	7|FCHL5JJBBXX_L2_wHAXPI059581-29_1_(paired)_contig_30268:467-687|+	N/A	3|LP161083-1_R1_(paired)_trimmed_(paired)_contig_111930:1757-1765|-	N/A	3|TCunknown-1_(paired)_contig_103562:455-463|-	1.89	0.4	0.94	TTTGGACACTGGGATTGAAAATAATTACAGAGACGAGCCAAGTTCAAGGAAGATAAAAATGGTGGGATTCAAAGGTGCAAGAGAGACAACAGCTGCAAAG	CCACCTTTGAAGGGCTAAAACGAGTCGAAGTACCTATCTCCCTGCGCGTCTGTTTTTGGCTTTTGGCTGCCTATAGTGACTAACTAATCTCTCCCCTTCA
CPSSR_664	CCT	954	7|FCHL5JJBBXX_L2_wHAXPI059581-29_1_(paired)_contig_70176:690-910|+	N/A	6|LP161083-1_R1_(paired)_trimmed_(paired)_contig_118915:631-648|-	7|FCHL5H3BBXX_L3_wHAXPI062220-17_1_(paired)_contig_133895:248-268|-	N/A	0.47	0.4	0.97	AATGCAGTAGAAGGTGACAAAAGGTTCTCATCTTTACCCAGATAACATATCACATCAACCATGCAAACCTTTCCAACACATCTACACTCCTCCTCTTCCA	TGTCGCCGCCGTCGAGGAAAGGGCTTTTGGCCTGAGAATTGTGGTGGTTACAGCTCCATACACTGATGAAGTTGTCCTCTGTTCTTTTGAGAGCTAATAA
CPSSR_665	CGA	955	5|FCHL5JJBBXX_L2_wHAXPI059581-29_1_(paired)_contig_176256:50-264|+	4|LP150221_R1_(paired)_trimmed_(paired)_contig_201082:113-124|+	4|LP161083-1_R1_(paired)_trimmed_(paired)_contig_148010:1013-1024|+	N/A	N/A	0.47	0.4	0.96	GGTTAGGGTCGGAGGAAAAGTTATCGAATTCTTCAATCTCGTAATCGTCGAGCAATGCCATGTTCCTATCTGGCTTCTCGCTTAACGACAGCACCGTGGC	AGACGACGATTCATCACCATCATAGTCCTCCTCCGAAGAGCTCATCGTTCTTGCCAATAACAGCTCAGTAATATCTTCTTCTTCTAGTGGTGGTTTCTCG
CPSSR_666	CGA	956	5|FCHL5JJBBXX_L2_wHAXPI059581-29_1_(paired)_contig_180834:556-770|+	3|LP150221_R1_(paired)_trimmed_(paired)_contig_127287:141-149|-	N/A	5|FCHL5H3BBXX_L3_wHAXPI062220-17_1_(paired)_contig_311147:319-333|+	N/A	0.94	0.4	0.96	TTTATTGGGAAGTCAGATCTGGCTTTTCTGATGGGACCAGATCTGGTCGGAGCTGAGTATGTGCCAGATTTTCAGGGGTGGTCTTCTTCCCGGAGCTGTG	GAATCACATGGGTGTTGGTCCTTTCTACTGGAGTTGGTTCCAGTTATGTTGTACTGTCTGTATTTTGGTGCGCCGGAGTTGGTTCCGGTCTAGTGGTCGT
CPSSR_667	CGA	958	5|FCHL5JJBBXX_L2_wHAXPI059581-29_1_(paired)_contig_46433:882-1096|+	4|LP150221_R1_(paired)_trimmed_(paired)_contig_139877:361-372|-	4|LP161083-1_R1_(paired)_trimmed_(paired)_contig_20418:149-160|+	4|FCHL5H3BBXX_L3_wHAXPI062220-17_1_(paired)_contig_152315:162-173|-	N/A	0.43	0.2	1	AACACGGTCGCGGGACTCACCGAATCCTCCTCCATCAGATCGTCCACTGTATCCATATCCGATGTTGTCGTCGTAATCGTCTTCTCCGAACCTTCCTCTT	GGACGCCAACCGATTCAGCTTTCTCCGAAACCTTGACTGTAGCAGCAATATCAGTAGAAGCAGGAGGTTCGAGAGACTGAGGTACTACGGGGTCTTCTTC
CPSSR_668	CGA	959	5|FCHL5JJBBXX_L2_wHAXPI059581-29_1_(paired)_contig_68466:196-410|+	2|LP150221_R1_(paired)_trimmed_(paired)_contig_3300:2145-2150|+	N/A	5|FCHL5H3BBXX_L3_wHAXPI062220-17_1_(paired)_contig_204324:108-122|-	4|TCunknown-1_(paired)_contig_128336:162-173|-	1.22	0.2	0.96	GGAGTCGGCAACGCCGTACCGGCACATGGATTGACAGCGTAAGCGGGGTCGTTGTAGATGGGATCTGATCGGACGGGTGTAAAGCTACAGCAGAATACGG	AGACGAAGATGGAAATGGAGGTTGGTGGAGATGATGACGATGAATGAGAATTCAAGAATTTCAACATTGTGATCAAGATTTTAGGGGTTCTTGATCACAA
CPSSR_669	CGA	960	6|FCHL5JJBBXX_L2_wHAXPI059581-29_1_(paired)_contig_143294:1046-1263|+	N/A	5|LP161083-1_R1_(paired)_trimmed_(paired)_contig_260841:95-109|-	8|FCHL5H3BBXX_L3_wHAXPI062220-17_1_(paired)_contig_168971:597-620|-	6|TCunknown-1_(paired)_contig_66037:692-709|-	1.09	0.2	0.97	AGCTATGGCTATGGCTACCTGCTTTAGGTCACCGAGTAAAGGAGGCGACAGGCTTCGCAGATCCAACACGAAACACAGAAGCACCATTTTGGTTTGGCTT	TCACCTCTCACTTCTGGCGCGAAATGCTACTCTCACTTTTTGTAAAATTGTAATTTTTCAAAGTTTTTAGGCTCTTTTACAGTTACAGTGAGAGACTAAT
CPSSR_670	CGA	961	6|FCHL5JJBBXX_L2_wHAXPI059581-29_1_(paired)_contig_64940:154-371|+	N/A	3|LP161083-1_R1_(paired)_trimmed_(paired)_contig_29961:786-794|-	6|FCHL5H3BBXX_L3_wHAXPI062220-17_1_(paired)_contig_160832:122-139|+	N/A	1.41	0.4	0.95	CGTGCACATGGCATTCTCAGGAACTAATAAAAAAATCATCAATCCAACGGCTCAGACTTCACCTAGCCCGGAAAAACCCCCGATTAGACGGCGACGGAGT	ACTCACCGACTCTCCATTCCCGTAAAAAAGGTCCGACAAGCAATTACCAACATCCTCAGGGGCAAATCTGACAATAACCTTAAAGTTCCTCTGTCCTCCC
CPSSR_671	CGA	962	7|FCHL5JJBBXX_L2_wHAXPI059581-29_1_(paired)_contig_158729:431-651|+	5|LP150221_R1_(paired)_trimmed_(paired)_contig_48549:1377-1391|-	5|LP161083-1_R1_(paired)_trimmed_(paired)_contig_152860:921-935|+	N/A	6|TCunknown-1_(paired)_contig_28212:2337-2354|-	0.83	0.2	0.98	NNNNNNNNGAAGATGAAGAAGAACAAGCCGACGAGGTTACTGCCGAAGCCAACGGAAGCGGAGGTAAAAGTATTGCTGTTGTGGATGCGAACGGCGGCGG	TGATGATTCGGATGAAGAACCCTTGGAGAAGGTTCTAGAACCTTTCTCGAAGGAGCAGCTCGCCGCTCTCGTTAAAGAAGCCGTCGAGAAATTCCCCGAA
CPSSR_672	CGC	964	6|FCHL5JJBBXX_L2_wHAXPI059581-29_1_(paired)_contig_60894:99-316|+	4|LP150221_R1_(paired)_trimmed_(paired)_contig_64578:2357-2368|+	4|LP161083-1_R1_(paired)_trimmed_(paired)_contig_208674:1809-1820|-	N/A	N/A	0.94	0.4	1	ACCTCCTTGAACAAAAGACTGAGAGAGCGTCGCTTGTCTCCGTCCTGCTCATCAACCTTGTCGCTATCAACAATTTCCTTGTCTTTAACATCATCATTAT	CACTAGTTTCGACTTTCTTCTCCAGTACAACAGCTGCTGCTACATCCTCCTTCACATCACAAACTGAAACAGTAACAACCTCCTCCTTCACATCAGAAAC
CPSSR_673	CGG	965	5|FCHL5JJBBXX_L2_wHAXPI059581-29_1_(paired)_contig_202198:645-859|+	N/A	N/A	5|FCHL5H3BBXX_L3_wHAXPI062220-17_1_(paired)_contig_9993:1469-1483|+	4|TCunknown-1_(paired)_contig_37835:1025-1036|+	0.47	0.4	0.97	AGAGAGGGAGAAGGAAGAGGACTAACAGTCCGAGGAAGTGGCGGCGGTGGGCGGAGAGTATGCGCTTTGATTCGAAAAGGATGGAGTATAAGTCCACTGA	TTCTTGCAAGGACGACATGGTTTATGAAGTTTTAGAGAGAGAAAGTTGCAGAGGAGAGAGAGAGGTTGGGATGATCGTAGTTGAAGGTGGTTGGAGGTGA
CPSSR_674	CGG	967	5|FCHL5JJBBXX_L2_wHAXPI059581-29_1_(paired)_contig_90967:338-552|+	4|LP150221_R1_(paired)_trimmed_(paired)_contig_63296:2309-2320|-	3|LP161083-1_R1_(paired)_trimmed_(paired)_contig_142109:208-216|-	N/A	4|TCunknown-1_(paired)_contig_6332:305-316|+	0.71	0.2	0.99	TTGTCGGCGAGCATGAGAAGACTCGGTCAACTTCTTCCTCATGCTCTTCTTGTCATTTTGTTGACTGTCATTGTTTTCGGGTCAATCACAGTTTCTCTGA	CGACCGAGAAGGAGATTCTGCTTCAATTCAAGGGCAACATTACGAGTGATCCGTACAACAGCTTGATTTCATGGGATCCGAGTAAAGACCCATGTCAAGA
CPSSR_675	CGG	968	6|FCHL5JJBBXX_L2_wHAXPI059581-29_1_(paired)_contig_136250:49-266|+	5|LP150221_R1_(paired)_trimmed_(paired)_contig_225095:401-415|-	N/A	5|FCHL5H3BBXX_L3_wHAXPI062220-17_1_(paired)_contig_298411:139-153|-	N/A	0.47	0.4	0.98	TAGGGTTTTAATTTTGATTGATGATGTTGATGGCGGACGGCAGTTTCAACTTCTGGTCCGGCAGCGATTCTGTCTCCGGTGGCGGTGATATTGGATCCGT	AGAATTCGCTATCAGTGATGAGGATTTCAACTTGTCCATTGATCTTGATTCGTTTTACTCGATCCTCGGAGAAGATAACGATCCACAACAGGTAGTTTTT
CPSSR_676	CGT	969	6|FCHL5JJBBXX_L2_wHAXPI059581-29_1_(paired)_contig_54631:268-485|+	5|LP150221_R1_(paired)_trimmed_(paired)_contig_194347:415-429|+	N/A	5|FCHL5H3BBXX_L3_wHAXPI062220-17_1_(paired)_contig_53621:277-291|+	N/A	0.47	0.4	0.99	GCCAAAGCAGCAAGGCATGGTGGCACAGAATGTGTTGTTGTTTGAGATATTGGTGGTAGTGCAGCACTTGCAGGGCAAGCAGAGCTGATAAGGTGCCAAC	GCATGGTCAATATCGGCCTCAATTACGCGATATTCGGTCTCCCCAATGGGCTGCATATGTATTTCTCCAACTCCAAGTGATACCTCTAATGGCCTCCTTT
CPSSR_677	CT	970	10|FCHL5JJBBXX_L2_wHAXPI059581-29_1_(paired)_contig_135518:873-1092|+	6|LP150221_R1_(paired)_trimmed_(paired)_contig_28173:6195-6206|-	6|LP161083-1_R1_(paired)_trimmed_(paired)_contig_260585:154-165|+	N/A	N/A	1.89	0.4	1	CCATTGGTGAGATGTCGTGGCACTACCACTTTGTACGTCCCTTACATATAAACGCGACAAATAGTCAGAGCCATTTGTAAGAGGAGACTTTATTGCGCAA	CAGACGCGGAGAGATTTTTTTCCTTTTCTTTTCCTCCGATCCAAACAACTCCACTTTTTTCGTTACAACAAACATTTCGGGTTTGTTAGAACAACAAAAT
CPSSR_678	CT	972	10|FCHL5JJBBXX_L2_wHAXPI059581-29_1_(paired)_contig_18336:93-312|+	8|LP150221_R1_(paired)_trimmed_(paired)_contig_210845:438-453|+	8|LP161083-1_R1_(paired)_trimmed_(paired)_contig_108768:131-146|+	N/A	N/A	0.94	0.4	0.99	TATAGATTTCTGTTTGAATTTTGGAATAATTTGGGTTTGTTTTTTTTGCAGGAGTGAAAATGGGTACACTATTAATGGTCGTGTAAAGATTCTAAGTAAG	CAAAGATTTAGTTTTACTATTTTTATTCATATTGTTGTTGATTAGGATGATTTGTACATGAATTAGAGTGGTTGCGTAATGTAGTTTAGGTTACACAACA
CPSSR_679	CT	974	10|FCHL5JJBBXX_L2_wHAXPI059581-29_1_(paired)_contig_203730:107-326|+	N/A	4|LP161083-1_R1_(paired)_trimmed_(paired)_contig_253649:830-837|+	11|FCHL5H3BBXX_L3_wHAXPI062220-17_1_(paired)_contig_23694:122-143|-	N/A	3.09	0.4	0.96	TTGTTTGTTTTGTTTTTGGCATTGGCAATATCCATATCCTTAATCCAACTCAAGTTCGTTAATCTGATGGAGGATCGCAAGGAGGTTTGTCATACTTCAA	AATGTTTTTATTTTTATTTTTTCTTATTATGCTCTGTTTGGTTGCTGAGAAAGCTGAGGAAAATAAAAGAAAATAAACTTCTCTTCTTTTTTTTTCGTTC
CPSSR_680	CT	975	10|FCHL5JJBBXX_L2_wHAXPI059581-29_1_(paired)_contig_214664:458-677|+	8|LP150221_R1_(paired)_trimmed_(paired)_contig_166551:193-208|-	8|LP161083-1_R1_(paired)_trimmed_(paired)_contig_73744:606-621|-	N/A	19|TCunknown-1_(paired)_contig_74997:4356-4393|+	4.55	0.2	0.94	TTGGAGGTTGTGTTCTAGCCATTTTGATTGCTTGGTTCTAATGTGACTTGCCCACCACCATGAATATGCATTGCTTGCAGCTCTCTGCAACATTCTCTCC	CCTCTCTTTCTCTCTCTACAAAGTTTCTTTATCTAGGAGACTAGGACCAATGACAGATTTTTCTCTTTTAAGAGAAAGGCACAAGACATGGCACCAAGTC
CPSSR_681	CT	976	10|FCHL5JJBBXX_L2_wHAXPI059581-29_1_(paired)_contig_214752:367-586|+	9|LP150221_R1_(paired)_trimmed_(paired)_contig_74380:877-894|+	12|LP161083-1_R1_(paired)_trimmed_(paired)_contig_4102:682-705|+	N/A	N/A	1.25	0.4	0.99	TGCATGGTATCTGTCACACATGATTTTACCTCGATCGTGTTTTTTCCCTTCTAAAAAAAAACTCCCCTTGCCAACCAGCTTTCTCTCTCTAAAAACTTCA	AGAAACTACACTTTCTCTCTCCTATGCCACCACTCCATTAATCTCTTCACCAACTCCATCCTTGTTTACATATACTCTAGAGTTTAGAGAGAGAAACAAT
CPSSR_682	CT	979	10|FCHL5JJBBXX_L2_wHAXPI059581-29_1_(paired)_contig_260305:211-430|+	N/A	N/A	11|FCHL5H3BBXX_L3_wHAXPI062220-17_1_(paired)_contig_208963:115-136|+	13|TCunknown-1_(paired)_contig_157690:179-204|+	1.25	0.4	1	ACCTCAAGTTTTCCGTGGTTATTGCAGCTAAAACTATTTTCGAAATTTACACCATGGACATTGTTTTACATCTTCTACAGGTGAGGATTTCTTTATTTCC	AGATTCCTTTGATGTAAAATTCATTCCTCTATTTTGCAGCATGCCAAAAGAAGAGGCTCAGCTGTACGCCGCAAATGAACTGTAAGTCCTTTCTTAATAT
CPSSR_683	CT	982	11|FCHL5JJBBXX_L2_wHAXPI059581-29_1_(paired)_contig_116230:558-779|+	N/A	7|LP161083-1_R1_(paired)_trimmed_(paired)_contig_115342:106-119|+	N/A	12|TCunknown-1_(paired)_contig_38467:460-483|+	2.16	0.4	0.96	CACTTCCAATTTAACTTTCATGAGCCCACCAAAACTTATGTCACTCACACACCCCCTTTGAGAATCCACGGCATAGAATCGTATACACCCACCATCATGC	CCAATTTTATGAACAATAATTTAAGCAAGTTCACTTATATGCTTTGTGTCTGCATGCATATAAATACCCTACTTCTTGCATCAACTAGTACACACTTCAC
CPSSR_684	CT	985	11|FCHL5JJBBXX_L2_wHAXPI059581-29_1_(paired)_contig_266422:536-757|+	N/A	N/A	10|FCHL5H3BBXX_L3_wHAXPI062220-17_1_(paired)_contig_294687:195-214|+	10|TCunknown-1_(paired)_contig_160100:566-585|+	0.47	0.4	0.99	GTCCCGCCGCAAATCCTATGATCGTACGAGGTCGTGTGTACTGCGACACTTGTCGTGCCGGTTTTGAAACCCCCGCCACCACCTACATCCGCGGTACTTC	ACAGTTTTGTTGTTTTGCGTGTTTATATTGTTTAGCAATGCTTGTATGAGATAGATCTGTGTGTGTAGTACAGTACATCTTTAGTTCACGCTGTTGAAAA
CPSSR_685	CT	987	11|FCHL5JJBBXX_L2_wHAXPI059581-29_1_(paired)_contig_299686:7-228|+	8|LP150221_R1_(paired)_trimmed_(paired)_contig_201029:259-274|-	N/A	N/A	11|TCunknown-1_(paired)_contig_116873:121-142|+	1.41	0.4	0.98	ATATAAAGTAAAGGGAAAAAAACATTATTGTAATTTGCAAGGGTATATTAGCAATTTGTAGCCTTTAGAAAAACCCTCGTCTTCGAAACATCTCAGGTTG	CCAAAATCTCTGGAATCAACAATGGCACAGCAAGGCCAAATTCCCATATACCCGATACCCACCGCCCAATATATAGACCAAACCTTCCAACCACCGTCTT
CPSSR_686	CT	988	11|FCHL5JJBBXX_L2_wHAXPI059581-29_1_(paired)_contig_61025:232-453|+	9|LP150221_R1_(paired)_trimmed_(paired)_contig_219904:233-250|-	9|LP161083-1_R1_(paired)_trimmed_(paired)_contig_156363:111-128|-	N/A	N/A	0.94	0.4	0.99	TTTATTCGAGTGTTCGTTCTTCTGTTATTGCACAACTAAGACTTCTTCAATTGTCTGATTGAGATATAGTTTTAAGACTGGGAATAAAATGCCATGGATG	CCATTGATATAATGCCATATGTCCACATTTAATAGGCCAGGCTCACCACGTCATTCGTGAGACGGTTATACCGAATAATTTCTCCCCTACCCTACGGCCT
CPSSR_687	CT	989	11|FCHL5JJBBXX_L2_wHAXPI059581-29_1_(paired)_contig_66874:184-405|+	N/A	9|LP161083-1_R1_(paired)_trimmed_(paired)_contig_9678:241-258|+	9|FCHL5H3BBXX_L3_wHAXPI062220-17_1_(paired)_contig_334832:160-177|-	N/A	0.94	0.4	0.99	ATAGTATATTTTTTTTACAGATTTTAAATTTTCTTTTACAATAATTTATGAGAAAACATATTTACTCGTCTTAATGACAAGCTGCATGCACTAGAAGATG	CCCCTAAAAAGAATATAGCAACTTGCCTTGATCTTTGGTTTTTAGAATTTGATGCCTCAAGGTTTCATCATGTTTTGTGAAATATACTTTACTCAGAGTG
CPSSR_688	CT	990	11|FCHL5JJBBXX_L2_wHAXPI059581-29_1_(paired)_contig_89803:72-293|+	N/A	N/A	10|FCHL5H3BBXX_L3_wHAXPI062220-17_1_(paired)_contig_173909:294-313|+	16|TCunknown-1_(paired)_contig_41360:431-462|-	2.62	0.4	0.94	TATAGAGGATAAGAGGATCCGGATTCTCTTTTTGTAGGTAACGTACGTGACCTGTACCGTTTGCCACTGGCTTCAAACACTTTCCCTCGTCGCTTTTGCC	CCCCAGATGTTCAGAAACCTACACCATTATTTCGCACCAGAAGACTACATTCAATACCTCGAAGAAGAGTACCTTTACGACCAAATGGACCAATTTCTTG
CPSSR_689	CT	991	12|FCHL5JJBBXX_L2_wHAXPI059581-29_1_(paired)_contig_20323:7-230|+	8|LP150221_R1_(paired)_trimmed_(paired)_contig_129350:1801-1816|-	N/A	7|FCHL5H3BBXX_L3_wHAXPI062220-17_1_(paired)_contig_242953:270-283|+	N/A	2.16	0.4	1	AAAATGTTTATAGTTATTCTATCAGGTCCATTTTTGAATTGGTAACCTAAAATGACACACGTCATACCTTAATCCAATAAAAATCACACCCGTAAAACTC	CCCTCTCCTCTCACGATCCTTGTTTTTTGTTCCTCCAAGACTCTCTCACCCCCACCCACACTGAAACCACGACATATCTCACTGTTGCCAGACAGCGACG
CPSSR_690	CT	992	12|FCHL5JJBBXX_L2_wHAXPI059581-29_1_(paired)_contig_206239:713-936|+	8|LP150221_R1_(paired)_trimmed_(paired)_contig_71699:272-287|-	8|LP161083-1_R1_(paired)_trimmed_(paired)_contig_79825:525-540|-	N/A	N/A	1.89	0.4	0.99	AGAATATTATCGCTGCTATAGATAGATATTCTTGATAACTTAAACTTAAACCGATGTAGTTTTTCAATCGTAAATACAGTACCAAATAAGGCATCAAGTA	CACCCACGCTAGGGCAACAATTCACGTTGTCGCGAAGAACCCTCTGATCAGCGAAGGTCGTGGCCGAAGTTCATGAAGATCTTTCTCTCGACCATGGTTT
CPSSR_691	CT	994	13|FCHL5JJBBXX_L2_wHAXPI059581-29_1_(paired)_contig_137572:159-384|+	10|LP150221_R1_(paired)_trimmed_(paired)_contig_86600:667-686|+	13|LP161083-1_R1_(paired)_trimmed_(paired)_contig_51533:1361-1386|+	N/A	N/A	1.41	0.4	1	TAATTAATAAAATAAATAAATAAAATACACCACTCCCACAAACACACCTCACACCCCTTGAAGTGTAGTGTAAGCCAACATATCAACCAACAAAACAACC	CCTCTCTCTGTGTTCTCTCTCTAGAAATAGAAAGAAAATCAAAACCTCCTGTCTGCAACTTCACCATCAATGGCGTCAAGCAATACCAACATCCTTGCGT
CPSSR_692	CT	995	13|FCHL5JJBBXX_L2_wHAXPI059581-29_1_(paired)_contig_144169:381-606|+	11|LP150221_R1_(paired)_trimmed_(paired)_contig_119326:982-1003|-	8|LP161083-1_R1_(paired)_trimmed_(paired)_contig_19419:2418-2433|+	N/A	N/A	2.05	0.4	0.96	ACTGATAAAGCTACTAAAGAACCAAAGTCTCCAAAAGCTACCAAATCCCCCAAGAAAGCTTGATTCCCCCCTTTTCCTTGTAGTTGATTTAGATCTCTCC	AGTTGTAGAAACATCTTTCTATGTAATCTCTCACTTAGTTTGGATTTTGTGTGTGAGAATTAATAGATGAAACCACTAGTTTCTGTCATCTTTTGTGCAT
CPSSR_693	CT	996	13|FCHL5JJBBXX_L2_wHAXPI059581-29_1_(paired)_contig_209251:357-582|+	N/A	N/A	10|FCHL5H3BBXX_L3_wHAXPI062220-17_1_(paired)_contig_89568:892-911|-	9|TCunknown-1_(paired)_contig_88254:1678-1695|-	1.7	0.4	0.99	TAAAGGTAAGCTCTCTTCCGTACAATAGCAACTTTCCCGAGAAAATTTTATTCCATTTTCCCGAGAAAATTCTCTCTCCTCCCCCGTGCTAACCAACACC	GCGCAGCCGGAGACTGCGTGCTGATGCGACCGTCCGATCAGTCAAAGCCATCGTACGTGGCGAAAATAGAGAGGATCGAGTCCGACAGCAGAGGCGCAAA
CPSSR_694	CT	999	13|FCHL5JJBBXX_L2_wHAXPI059581-29_1_(paired)_contig_2342:215-440|+	11|LP150221_R1_(paired)_trimmed_(paired)_contig_12983:2938-2959|-	12|LP161083-1_R1_(paired)_trimmed_(paired)_contig_75839:417-440|+	N/A	N/A	0.82	0.4	0.99	CCTCCACCGCCATTTCCGCCATGAAAGAAAAAGCTTCACGACCATGCACCCCTCGTCGTTCCAAGAAACGCAAGCTCTCGAAACAGCAAGGTACCGCATG	AGTTATATATGAGCTAAATGTGTGTTTTGAACTGTTTATTCATGTTGGAAGTGAGTGTGATTGATCAATATTGTTGCAGAGAATATTAAGAAGAAAAAAA
CPSSR_695	CT	1000	14|FCHL5JJBBXX_L2_wHAXPI059581-29_1_(paired)_contig_225121:134-361|+	7|LP150221_R1_(paired)_trimmed_(paired)_contig_52029:468-481|-	13|LP161083-1_R1_(paired)_trimmed_(paired)_contig_74883:301-326|-	N/A	N/A	3.09	0.4	0.95	AGAGAAGCCATGTGATACCAACCGTATACTAGTATATATACTTTAATAACTGGATTTGCTCTTTAGCGTGGCACAGCATTATTTCATTCATGTTTAATTC	CATGGTGTTAATTTGGACTCCCATCTTAGGCAAATTTCTCCAACTTCATGTGCCCCTAAAAATTTGAAGGAAAGAGCTAGATGTGTCCAACTCGTGCATC
CPSSR_696	CT	1003	15|FCHL5JJBBXX_L2_wHAXPI059581-29_1_(paired)_contig_116763:267-496|+	13|LP150221_R1_(paired)_trimmed_(paired)_contig_83305:3741-3766|-	14|LP161083-1_R1_(paired)_trimmed_(paired)_contig_106606:667-694|-	N/A	N/A	0.82	0.4	0.99	TTGTGCTAAATTAAGAGCACACGATTCAGTCTCCTTGAGAATGTGAAGCCATAAACACCGTCTTCTCCATCATTCCACTTCAGTAGGAATAACATCCCAA	AACATCCCAAAACAGTTAATGAACCGTTTACTAACTGTGTTCCGAACTTTGGGTAAGCAAATTCCATGCTTAAGTAAACCCATTCTGATATAATCATTAA
CPSSR_697	CT	1004	15|FCHL5JJBBXX_L2_wHAXPI059581-29_1_(paired)_contig_166235:242-471|+	14|LP150221_R1_(paired)_trimmed_(paired)_contig_88917:1218-1245|-	15|LP161083-1_R1_(paired)_trimmed_(paired)_contig_28541:187-216|-	N/A	N/A	0.47	0.4	0.99	TGGGCTCTTCAGCAATCGAATTTCTGTGGGTGCAGACAAAGCTGGCAATCGGTATTTCACCAGAAAAGAAGAGCTCGATGGTATCAGTGAGTGGGTCTCA	CCTCCTGCTAGTTTTACTTATAATTCGATACATGGTACATGTTTCTCAATTGGGTTTTATCTTTAATTTGGATGTTAAACATATATTTTACTGTTTGGTT
CPSSR_698	CT	1006	16|FCHL5JJBBXX_L2_wHAXPI059581-29_1_(paired)_contig_60818:211-442|+	11|LP150221_R1_(paired)_trimmed_(paired)_contig_16646:1575-1596|+	15|LP161083-1_R1_(paired)_trimmed_(paired)_contig_4370:5032-5061|-	14|FCHL5H3BBXX_L3_wHAXPI062220-17_1_(paired)_contig_24373:524-551|-	N/A	1.87	0.2	1	CCAGGGGAGCCAGAAGTGCAGCCTGAAGCAGATCCTGTTCAACAAATCATTGCTCATAGACTATGGCTTGGATTTTTCATAGATCGGTTTGAGGTTTGGA	GTAATGAGTGAGCAGCTCCTGTTCTGTGTTTACTGTAGATTACAAGGGATCCACACAGCCTGTTTTTAATCATTGGTGATTAATTTTCTTTACTTTCAAC
CPSSR_699	CT	1008	19|FCHL5JJBBXX_L2_wHAXPI059581-29_1_(paired)_contig_73536:935-1172|+	19|LP150221_R1_(paired)_trimmed_(paired)_contig_152152:98-135|-	N/A	21|FCHL5H3BBXX_L3_wHAXPI062220-17_1_(paired)_contig_30788:703-744|-	N/A	0.94	0.4	0.99	ATAAGGATGTGAAACTTGAGTACTTGGAAGAGGCATTCACAACATCTAATTGGATAGTTCGCATTTACAAAGTGAAACCACCCAAGAATAGGTGGTGAGG	GCGGGACAGGAATGAAACTTGGTAGAACTGTGAGGCTCAAATCTTAGAGATATTAAAGTTATACTTATTTTATTATTAGAGATAGAATGAACTTTTTTTT
CPSSR_700	CT	1009	20|FCHL5JJBBXX_L2_wHAXPI059581-29_1_(paired)_contig_134744:133-372|+	15|LP150221_R1_(paired)_trimmed_(paired)_contig_151748:820-849|+	18|LP161083-1_R1_(paired)_trimmed_(paired)_contig_62078:1620-1655|-	N/A	N/A	2.05	0.4	0.99	CTTCAGCTCAAAGTTTCAGTGAAGAACAAGATGAAGATGTCAGAAAATCCCATTTCCCAGATGGGTTTCTCTTTGGAACTGCCACTTCTTCATATCAGGC	GTTTTCTTTTAATGTGAAAAATTCTGAGATTCTTGATTTACAGGTTGAAGGAGCATATGATGAAGATGGTAAAGGTCTATCAAACTGGGATGTTTTTGCT
CPSSR_701	CT	1010	20|FCHL5JJBBXX_L2_wHAXPI059581-29_1_(paired)_contig_262080:237-476|+	18|LP150221_R1_(paired)_trimmed_(paired)_contig_57989:602-637|+	N/A	15|FCHL5H3BBXX_L3_wHAXPI062220-17_1_(paired)_contig_167992:233-262|+	N/A	2.05	0.4	0.99	TAGTACAATGTAACTGGACACTAGCCACCAAGCCGCCTTGCTCGTGTGTACAAATAGTAGTAGTATATGACAAACTTCTTTCTTAATATTAATCAACACA	CATCGATGGATATTTCCCCAACAACATTATTTCATTCACCATCTTCAACATTATCACCTCTATCTTTGATGGAAAACTACCAAACAATATTCCATTCTTC
CPSSR_702	CT	1011	6|FCHL5JJBBXX_L2_wHAXPI059581-29_1_(paired)_contig_103378:100-311|+	6|LP150221_R1_(paired)_trimmed_(paired)_contig_26839:1714-1725|-	6|LP161083-1_R1_(paired)_trimmed_(paired)_contig_14717:1245-1256|+	4|FCHL5H3BBXX_L3_wHAXPI062220-17_1_(paired)_contig_100558:471-478|+	N/A	0.87	0.2	0.99	GACATTATATGGAGCGAAGATTACTGGTGGGGGTTCTGGTGGAACAGTTTGTGTAATAGGAAGGAATTCGCTAAGAAGCAGCCAACAAATTTTTGAGGTA	TTTAATGGTAAAGAGTGACTGAATGGGAAAATTATATAGTTGAATTTTTCCTCCATCCTACAGTATAGGGAGGGCTATGTAATTGGTGGTACAATCTCTT
CPSSR_703	CT	1012	6|FCHL5JJBBXX_L2_wHAXPI059581-29_1_(paired)_contig_103895:204-415|+	6|LP150221_R1_(paired)_trimmed_(paired)_contig_213833:172-183|+	7|LP161083-1_R1_(paired)_trimmed_(paired)_contig_282634:169-182|-	7|FCHL5H3BBXX_L3_wHAXPI062220-17_1_(paired)_contig_279025:358-371|-	9|TCunknown-1_(paired)_contig_112931:576-593|+	1.1	0	0.99	TTGTAGAAAGCGAGGTGTGTGTTTCAATGGTCATCCTTGAATTCTGCATTTAAGTGAATTCAAGATCACTTAATGACAGGCAGGTAGCCTCACTTATATC	CCAACTTTCTCTCTCTAAACTCATTAAAGTTTTAATCACTCCCCTGCACAGTGTGTGTATGAGAATAAGCGTCAGAAACTACTCTTAATACCACTCAACT
CPSSR_704	CT	1013	6|FCHL5JJBBXX_L2_wHAXPI059581-29_1_(paired)_contig_104611:842-1053|+	6|LP150221_R1_(paired)_trimmed_(paired)_contig_75741:171-182|-	5|LP161083-1_R1_(paired)_trimmed_(paired)_contig_54910:2025-2034|-	N/A	7|TCunknown-1_(paired)_contig_155218:601-614|+	0.71	0.2	0.98	ACTGAAGGGTATTGCTGTCTGAACCTGGAAAACTTGCATATGGATTATGATTCCCGATACTATGATGTATAATTTTTTTCTTCATCTCTGTCTCCCTCTC	CAGAAACTCGTTTAATTTGCCCATTTACTGCATCTGCATTGTTGAACTTAGGGTAATCTGCAGTTGCAGCATGTTGTAAAGTCGTCTTCGCTTTAACTGC
CPSSR_705	CT	1014	6|FCHL5JJBBXX_L2_wHAXPI059581-29_1_(paired)_contig_105209:43-254|+	4|LP150221_R1_(paired)_trimmed_(paired)_contig_130387:553-560|-	4|LP161083-1_R1_(paired)_trimmed_(paired)_contig_49012:668-675|-	N/A	6|TCunknown-1_(paired)_contig_31343:457-468|+	1	0.2	0.96	AAGAAAACTCTCATTCTTCAAACATAATGTGGACACAGAGAGACAATGTTCTTCTCGATCAAAGCCTAGTTACATTTCATTTCAAAGGTACATGCTCATG	TTCTCTCTCAACAATGGGGTTTGTTGAGATTATTGGGTTCTTGTAAGTTTTGAATTCAGAGTCATTGTTGATTTATGTGAAATGGGTGTTAACATTTTTG
CPSSR_706	CT	1015	6|FCHL5JJBBXX_L2_wHAXPI059581-29_1_(paired)_contig_107234:678-889|+	7|LP150221_R1_(paired)_trimmed_(paired)_contig_12137:503-516|-	7|LP161083-1_R1_(paired)_trimmed_(paired)_contig_100385:212-225|-	N/A	N/A	0.47	0.4	0.99	ACTGTTCTGAAACACCAATTCACCATTCGTATACAACATTACCTTTTTCTTGTATGTATGGCACAGAGAGGTATGGATTCATAACTGGAGACATACTTTA	CCTCTTCTGTAGTCTAGTACTGTAGTCCTACTCTTTTGCAACATTGGTTAGTGCCAAGGCAGAAACAGACTTTATTTTTCGTACAAAGTAAGGTAAATAG
CPSSR_707	CT	1016	6|FCHL5JJBBXX_L2_wHAXPI059581-29_1_(paired)_contig_112245:221-432|+	5|LP150221_R1_(paired)_trimmed_(paired)_contig_94750:714-723|+	5|LP161083-1_R1_(paired)_trimmed_(paired)_contig_101183:1755-1764|+	N/A	N/A	0.47	0.4	0.99	GCGGTACATGTCAGAATTGGAACACAAAGTGCAAACTTTACAGGCAGAGGCAACTACATTGTCTGCCCAGGTTACAGTGTTACAGGTACGGGTCCAGATA	CAATTGAATTTCAATTTTCATTTACCTACTTTTTAAACTGGTTTCTTTCCGTTTCTTGCATGTAGAGAGATTCTGCTGGGCTTAGCAGTCAAAACCACGA
CPSSR_708	CT	1017	6|FCHL5JJBBXX_L2_wHAXPI059581-29_1_(paired)_contig_116664:876-1087|+	N/A	N/A	5|FCHL5H3BBXX_L3_wHAXPI062220-17_1_(paired)_contig_281955:298-307|+	5|TCunknown-1_(paired)_contig_26475:1550-1559|-	0.47	0.4	0.98	AAGACTTGGTCTTCTATCAATATAAAACTGCTACGAACCATAAGAGTGGTTGAATCTTTCAACCTTGCTTTTCGTAGTTACAAATCTTGCAAAAGGTGTG	CAAAAAACCAAAACCCAAGTTTTTGAATTCTCTCTATCATTCACTCACTCCCTCTGTAATCTACAATGGCAAATAAGAAATGTGAAAAACCTCTTCACAT
CPSSR_709	CT	1018	6|FCHL5JJBBXX_L2_wHAXPI059581-29_1_(paired)_contig_119033:193-404|+	6|LP150221_R1_(paired)_trimmed_(paired)_contig_102361:407-418|-	6|LP161083-1_R1_(paired)_trimmed_(paired)_contig_273067:154-165|-	7|FCHL5H3BBXX_L3_wHAXPI062220-17_1_(paired)_contig_181587:232-245|+	8|TCunknown-1_(paired)_contig_42314:2002-2017|-	0.8	0	1	ACGGTTCACCTACAAATCGTTTTTCTCCAAGCTGCGGGCTCAGATAGGGCGATCCTCTCTCTCCATATCTTTTCATCTTGTGCACTGAAGTCTTGTCAGC	AAATTAGATGACACTAGTTACTGCAAGGGCCTCACTCTTAATAAAGGGGAACCCTCAATCTCCCACCTTTTGTTCGCCGACGATTGCTTCGTCTTCTTCA
CPSSR_710	CT	1019	6|FCHL5JJBBXX_L2_wHAXPI059581-29_1_(paired)_contig_119444:32-243|+	5|LP150221_R1_(paired)_trimmed_(paired)_contig_102469:1451-1460|-	5|LP161083-1_R1_(paired)_trimmed_(paired)_contig_164283:256-265|-	6|FCHL5H3BBXX_L3_wHAXPI062220-17_1_(paired)_contig_156473:481-492|-	7|TCunknown-1_(paired)_contig_19329:1347-1360|-	0.75	0	0.99	AATGTGGACTTCTTTTGTGAACCGTCAGATTAGATCAATGGCTATGTATTACTCAAAGCATCGGGCAGGTCTCGGCTTTAATAAGCCGATTGGTTATTTC	CAATCTTTTTCGATCAAATCATTACATTTTCAAATCTATGCAACTTCACTACCTTCTCAACCAACACTTGTTCCAGTAACGCTTCAATGGCTTCCTTTCT
CPSSR_711	CT	1020	6|FCHL5JJBBXX_L2_wHAXPI059581-29_1_(paired)_contig_130330:660-871|+	8|LP150221_R1_(paired)_trimmed_(paired)_contig_111058:1388-1403|+	7|LP161083-1_R1_(paired)_trimmed_(paired)_contig_74919:413-426|+	5|FCHL5H3BBXX_L3_wHAXPI062220-17_1_(paired)_contig_75911:232-241|+	N/A	1.12	0.2	0.96	TAATGTTTCATCTAGAAACCCTAACTAGGTGATGTAGCTCATAAAGGGAGGAAGAGAAACCATTGTCATCAAGTTCATCTTCTTCTTCAAGTTTCTCCTC	AGAAATTAGTTATTTACAAAAAAATGGCCAAATGTCTTTTTTCTTTCACAAAAAGTTTTATTTATAATTTTACACAATGATCCGGAGTTGGGCCTCCCGA
CPSSR_712	CT	1021	6|FCHL5JJBBXX_L2_wHAXPI059581-29_1_(paired)_contig_133893:466-677|+	8|LP150221_R1_(paired)_trimmed_(paired)_contig_60246:360-375|-	7|LP161083-1_R1_(paired)_trimmed_(paired)_contig_82099:829-842|+	5|FCHL5H3BBXX_L3_wHAXPI062220-17_1_(paired)_contig_150998:135-144|-	N/A	1.12	0.2	0.97	GGTGTACGCGATCGAGCCAATGCTGTTGATGATGAAGACGATGTTGTTGATGATGATCTCACAACTCGAAACCCAGCTCGCATGACCTGTTGCATCTTTA	CCTCTCTCTATAAAGTCACACTGACTGGTTCGGTGGTTTCACCTTCGAGAGACTGGAAAATTGGTTGCAAGGACCAAAGTGGGCTTTGATGACTGTAGTT
CPSSR_713	CT	1024	6|FCHL5JJBBXX_L2_wHAXPI059581-29_1_(paired)_contig_138351:54-265|+	4|LP150221_R1_(paired)_trimmed_(paired)_contig_50369:450-457|+	N/A	9|FCHL5H3BBXX_L3_wHAXPI062220-17_1_(paired)_contig_172236:289-306|+	N/A	2.05	0.4	0.9	ATTAAATGTACGAAATGACCAAAATAACCGTCTTTTACATAGGAAAGTCCTTATTAGCTTCACATATGAATAAAACCCGCGTCTGTCATCTCTATCTCTC	AAACTTTAACTCCCTCTCTCTCATCAATCAATTTCTCTCTCCGTGTACCCATCGTCAAATGATCATCGTCAATTCAATTAACCCCACAAAATAAGAACAA
CPSSR_714	CT	1025	6|FCHL5JJBBXX_L2_wHAXPI059581-29_1_(paired)_contig_145763:330-541|+	6|LP150221_R1_(paired)_trimmed_(paired)_contig_120852:282-293|-	6|LP161083-1_R1_(paired)_trimmed_(paired)_contig_40148:781-792|-	5|FCHL5H3BBXX_L3_wHAXPI062220-17_1_(paired)_contig_291754:491-500|+	N/A	0.43	0.2	0.96	CTCACAGCATTCATTGCCAATCTACTACTTACTTGTTAATCTGTACCTTTTAGTGCACGATTGCTTAAAATTTGTTTTCATCAAAAAAATTGTAGAGATG	GTCTCTCATCTCCTTATATATATAGCTGGAGATGCTAATATCCCCGAGGTGATGGGGTTCTCAACCTTGTTTGACAATGTTCATTTTTTCCTGCGTAAAG
CPSSR_715	CT	1026	6|FCHL5JJBBXX_L2_wHAXPI059581-29_1_(paired)_contig_145833:615-826|+	10|LP150221_R1_(paired)_trimmed_(paired)_contig_66907:1705-1724|-	8|LP161083-1_R1_(paired)_trimmed_(paired)_contig_27478:1121-1136|-	N/A	N/A	1.63	0.4	0.99	TGTTGATTCAGATGGAACGATTGTTTGGTCTACAGATGCACCTGCTAAGTTGAAAAAGAAAGAATACAAAGAACCTTGGGTAAGATATGTCACTGTTCAC	ATAGTCCATACATATATTTGTAACTCTGTGAGTACTGAGTATGTAAAGAATATAGGTATATCTGAGCATCATATTTCCTTGCTACCACTGCAGGACTACC
CPSSR_716	CT	1027	6|FCHL5JJBBXX_L2_wHAXPI059581-29_1_(paired)_contig_14682:267-478|+	6|LP150221_R1_(paired)_trimmed_(paired)_contig_84768:149-160|+	5|LP161083-1_R1_(paired)_trimmed_(paired)_contig_4374:2772-2781|-	5|FCHL5H3BBXX_L3_wHAXPI062220-17_1_(paired)_contig_113744:711-720|+	5|TCunknown-1_(paired)_contig_9391:700-709|+	0.49	0	0.98	CCAGTAATCGCCGCCATCCAGATATGAAGAGTCTTCGACATCGCTGACGACAATCGACACCGACACCAGCAAAGCTTGCCGCCCTTCACTCACCAACACA	ACGAATCTCCATTTTATGGGTTTTCAAAATAGAGCCTTGCTTTGAAATCTGGAATTTGATCCATTTGTTAACATTATTGGGTATTTGTAGTGTTTCTGGA
CPSSR_717	CT	1028	6|FCHL5JJBBXX_L2_wHAXPI059581-29_1_(paired)_contig_151098:324-535|+	6|LP150221_R1_(paired)_trimmed_(paired)_contig_80603:401-412|+	5|LP161083-1_R1_(paired)_trimmed_(paired)_contig_270594:509-518|+	N/A	6|TCunknown-1_(paired)_contig_9463:600-611|+	0.43	0.2	1	ATAAAGCAAGGATGAAAAGATGTGTCCATGTTAAAAGAGAGCCATTGTTGGCTGTGATTGTCAATGAGAAGAGAGGACTTGGTGAGAGTTGTCACTCTCA	TTACAATACACTTTTTACTCACATCTCATAATGTGCACTGAGGAGTGGATTTGGGTGTAGTGATTGTGATTGTGAGGTTTTTTATTTTTTTAGCATAGCA
CPSSR_718	CT	1029	6|FCHL5JJBBXX_L2_wHAXPI059581-29_1_(paired)_contig_160287:4-215|+	7|LP150221_R1_(paired)_trimmed_(paired)_contig_195350:772-785|-	6|LP161083-1_R1_(paired)_trimmed_(paired)_contig_109535:246-257|-	7|FCHL5H3BBXX_L3_wHAXPI062220-17_1_(paired)_contig_195078:396-409|+	N/A	0.5	0.2	0.99	AGAGAGTAGAAAAAAAAGAAGAAATCAAGACGCGTTCTAGTCCGTATAGTTCTAGAGAGAGAAAGGAGAAGCAAAGCGGTCTTCCAGTCACAGTGAATAG	CCTCTTTCTCTCTCTAGACTCTCTATCTTTTGTTTCTTCTTCAGAACACTTGTCCGAGAGCTGTTCGATCATTTCTTAGGATAATCTTAGGTTAGCTAGG
CPSSR_719	CT	1032	6|FCHL5JJBBXX_L2_wHAXPI059581-29_1_(paired)_contig_163894:263-474|+	5|LP150221_R1_(paired)_trimmed_(paired)_contig_182937:275-284|+	N/A	7|FCHL5H3BBXX_L3_wHAXPI062220-17_1_(paired)_contig_78201:750-763|-	N/A	0.82	0.4	0.99	AAAACACCTCAATACACCACATTTGTTAGCATGAAACAGTTGTCTCCTCTAGATAATTCTTATATTAGGCATGTAATAATAACTAAATCTTTTGAATTAA	CCTAGTATCCATCTACGTTTCTTTTTCTTCTCTCAATATATGTAGTACTTTTCCATTGATTCTTTATCTCACCGTCCCTTTTTCTTTCTTTCTTTCTCTC
CPSSR_720	CT	1033	6|FCHL5JJBBXX_L2_wHAXPI059581-29_1_(paired)_contig_16674:307-518|+	5|LP150221_R1_(paired)_trimmed_(paired)_contig_193584:387-396|+	N/A	5|FCHL5H3BBXX_L3_wHAXPI062220-17_1_(paired)_contig_116296:594-603|+	N/A	0.47	0.4	0.99	TTTAAAAAGAAAAAGAGAAAGGTTTGTAACATATTTGGTGTCTCTTCCTCTCCTTTTCCTTCACACTTAGACAGGCACATGTTGTAGGTTATCCAGTTAC	CCTTCCTTTCGTTTCTCTTGCAACTCAAGTGGTGCCTGCTCTGGTACAATCTGGGAGCCTCAGAGGTTGCTACTCTATCAACCGCTGACATGCTCCAACG
CPSSR_721	CT	1034	6|FCHL5JJBBXX_L2_wHAXPI059581-29_1_(paired)_contig_171412:30-241|+	7|LP150221_R1_(paired)_trimmed_(paired)_contig_172739:135-148|+	7|LP161083-1_R1_(paired)_trimmed_(paired)_contig_50905:246-259|+	8|FCHL5H3BBXX_L3_wHAXPI062220-17_1_(paired)_contig_52241:372-387|+	N/A	0.71	0.2	0.99	ACTGTTAGATTTGATTGTTGTTTGACCGGATTTATTCTAAATCAGTGATACTTACAAGTATTTGTACAGTTTTGTTTTGAATCATGTTTTCAATTTGTCA	AAAAATTTTCAAGCCCTCCCTAAAACTAAGATTAATGGAGATATACATACCAATTTTGATACAGTTTTCTCCTAAGTGACGACGAAACCATCGTCATAGT
CPSSR_722	CT	1036	6|FCHL5JJBBXX_L2_wHAXPI059581-29_1_(paired)_contig_175668:34-245|+	8|LP150221_R1_(paired)_trimmed_(paired)_contig_9539:1074-1089|+	N/A	N/A	6|TCunknown-1_(paired)_contig_138741:617-628|-	0.94	0.4	0.98	TTAGAAAATGCATTAAACAGAATTGCAGCGCTCAAAGAACCATTGATTGCTCATGCTAATCAACCTAACATCAGATCTTCACTTCCAAGGTTAACACGAC	GTCTGGTGTATGTCTGAAGATTATTTGTTTATCCATGAGCTTCTCCCGATCCTGATTGTAATATTTGGTGGAATGCAATGTTTTCAGGTCTGTTATGGTT
CPSSR_723	CT	1037	6|FCHL5JJBBXX_L2_wHAXPI059581-29_1_(paired)_contig_181870:130-341|+	8|LP150221_R1_(paired)_trimmed_(paired)_contig_154436:1417-1432|-	9|LP161083-1_R1_(paired)_trimmed_(paired)_contig_13635:1073-1090|-	7|FCHL5H3BBXX_L3_wHAXPI062220-17_1_(paired)_contig_80871:1193-1206|-	N/A	1.12	0.2	0.97	ATCACACATTTTGTCAAGCACATCAAATCAAATTGGATAATGAATCATTGTATAAACTATCATTCATCTGCAATCACCATTCACAACCCTCGCTCAGTCC	TCCCTTGCCACTGTTAATTGGTGTCTCCCTGAACCGCCGACAAATCACAGATCTGGACAAGTTTTTATTTATTTACTAGTTTCTTGTGTTCTTTTCATTT
CPSSR_724	CT	1041	6|FCHL5JJBBXX_L2_wHAXPI059581-29_1_(paired)_contig_192296:148-359|+	3|LP150221_R1_(paired)_trimmed_(paired)_contig_85544:2360-2365|+	N/A	7|FCHL5H3BBXX_L3_wHAXPI062220-17_1_(paired)_contig_50514:566-579|-	7|TCunknown-1_(paired)_contig_97316:722-735|+	1.64	0.2	0.98	CTCTAGTGGCTAAGTATTAGAAATTAAGAAATGAACTATTTGGAGGGGCTCATATGATGTCTTGGTTTGACATCTCTTCATATTTGATGGCAGTGATGGA	CATGTTTGTATGTGTGGTGGTTAGAATGAAGTAGTAAAAGCTACTTATGATTATTTGAGGAGAGAACTTTGACTACTGTTTTGATATGGAGTAAAATTGA
CPSSR_725	CT	1046	6|FCHL5JJBBXX_L2_wHAXPI059581-29_1_(paired)_contig_210544:26-237|+	3|LP150221_R1_(paired)_trimmed_(paired)_contig_25398:126-131|+	6|LP161083-1_R1_(paired)_trimmed_(paired)_contig_167666:384-395|-	6|FCHL5H3BBXX_L3_wHAXPI062220-17_1_(paired)_contig_46433:279-290|+	N/A	1.3	0.2	0.97	GGGTACATCCGTAAATATAGGGAACATACGAAGGTTCAATTTCTTAAGGAAAGGTCACATGATTGCCCGAACCCGAAAGACGTCAAAGTGGTTTATCAGA	CCCCACTTCATTTGTCGACACGTAGCACTTTTTGGGACCTTTACCATTTACTATACCCCTTGGTTTTAAGGTTTCTTCCAGTTCTCGGTTTCCTATTAAC
CPSSR_726	CT	1048	6|FCHL5JJBBXX_L2_wHAXPI059581-29_1_(paired)_contig_215501:83-294|+	6|LP150221_R1_(paired)_trimmed_(paired)_contig_142150:253-264|-	5|LP161083-1_R1_(paired)_trimmed_(paired)_contig_220890:142-151|+	N/A	N/A	0.47	0.4	0.97	TACACCACATATTCCACTCATCCCCTATCCTATAAATACCCCCCTCACTTCACATTTTCCTTACACTCATAACTCCTTTCCCCCTCTATTTCTCTCTTTG	AAAATACCACAACCAACTCTCAACCCCTCTTCCCATTTCATTTCCGTGAGCCCCCCAAACAACCACCCCACCAAATCTTCATTATCCCATATTTATTTTC
CPSSR_727	CT	1054	6|FCHL5JJBBXX_L2_wHAXPI059581-29_1_(paired)_contig_232601:234-445|+	N/A	7|LP161083-1_R1_(paired)_trimmed_(paired)_contig_137239:1152-1165|+	7|FCHL5H3BBXX_L3_wHAXPI062220-17_1_(paired)_contig_3087:1909-1922|+	N/A	0.47	0.4	0.99	TTGGGTTCGCCTTCTTTTGCTTAGAGTCGCTACTAAGCTTGTGGGTACTCCAGGTTAGTGGAAGACAGCATTTAAACTATGAAATTAGAACAACTCTGTC	CCCAGTTAAACTATTAAATTAGAACAATTCTACTCTCTCTCCACCCTCTCTACTGTCTTTCTCTGTCTCTCTCATGGACGTTCCTTCCTCTTTTTGGAAA
CPSSR_728	CT	1055	6|FCHL5JJBBXX_L2_wHAXPI059581-29_1_(paired)_contig_239294:42-253|+	6|LP150221_R1_(paired)_trimmed_(paired)_contig_6116:2230-2241|+	7|LP161083-1_R1_(paired)_trimmed_(paired)_contig_14074:452-465|-	10|FCHL5H3BBXX_L3_wHAXPI062220-17_1_(paired)_contig_169727:804-823|-	9|TCunknown-1_(paired)_contig_73027:508-525|+	1.62	0	0.99	GTACTCATGATATTTTATGATGAAGGTATCCGGGAGAGCAAAAGCAGAAAAGGGGGAGGCCGAAGAAGGTCAAAGATCAGTTAGTTGATGAGAATGAGTA	TTCACTGATGCTTGTGTGTGCACGCTCACGTTCATTTGTATTTTTTCTTTTGGGTTTAGTTGTAATGAATAAATTATTCGGCCCTGAAGGTGCCAGGAAG
CPSSR_729	CT	1056	6|FCHL5JJBBXX_L2_wHAXPI059581-29_1_(paired)_contig_255113:145-356|+	5|LP150221_R1_(paired)_trimmed_(paired)_contig_58689:114-123|+	5|LP161083-1_R1_(paired)_trimmed_(paired)_contig_63449:1497-1506|-	6|FCHL5H3BBXX_L3_wHAXPI062220-17_1_(paired)_contig_206307:130-141|-	N/A	0.5	0.2	0.98	GATCATCCTTTTTTGTTGCATCTCTCAATTTCGTCCCCGTACTTATCCAGAGACCCATTAATTATTTCCAAAAGCCGATAAACACAAGTTGGTACCCACC	CCCTTGTTTTTATTTAGTTTTGGAGCTTTCGGCGTACAGCATAGTTCGAGAGAGAGGTGACTTTTGGAGAATGCAAAGGACGTATAATATATATTGTAGG
CPSSR_730	CT	1057	6|FCHL5JJBBXX_L2_wHAXPI059581-29_1_(paired)_contig_255586:263-474|+	N/A	5|LP161083-1_R1_(paired)_trimmed_(paired)_contig_180985:449-458|-	N/A	5|TCunknown-1_(paired)_contig_65242:502-511|-	0.47	0.4	0.98	CTTCCATGTTTTTAGTTAGTGCAATATTTTCTCATAAGATTGTCTTCTATTTGCTGCTCTCATTTTCTGATTTCCTTGGTGCTAATGCTTCTGACATGAA	CGCTCTCTCTCAGGAACAGTCGTGGACACAAAAATAGTGCATCCGACAAACCATGACTTTTACATGTGTGCCCAGGCTGGGATGATTGTAAGTGTTCATG
CPSSR_731	CT	1058	6|FCHL5JJBBXX_L2_wHAXPI059581-29_1_(paired)_contig_26284:835-1046|+	5|LP150221_R1_(paired)_trimmed_(paired)_contig_15915:891-900|-	5|LP161083-1_R1_(paired)_trimmed_(paired)_contig_25740:2623-2632|-	6|FCHL5H3BBXX_L3_wHAXPI062220-17_1_(paired)_contig_67995:763-774|-	N/A	0.5	0.2	1	CTAGTCTTCTCTATTATATTTTTATGGTTACTTCTTCCATGGTTTTCTTTCTCATATTGGTGCTTCTGTTTTTCCTTGGTGATCTTCGTCATATCATATC	CAAACCCTTTCTGAATACTCACTGCCGGGAAAAAAACAACGCATAAGGGATATTTTCAAACATAATTCCATAAACCACTGATTTTACCGAATGTCAACTT
CPSSR_732	CT	1059	6|FCHL5JJBBXX_L2_wHAXPI059581-29_1_(paired)_contig_279528:72-283|+	10|LP150221_R1_(paired)_trimmed_(paired)_contig_91511:527-546|+	10|LP161083-1_R1_(paired)_trimmed_(paired)_contig_178658:206-225|-	N/A	N/A	1.89	0.4	0.97	TGCCTTAAATTATACAGTATTCTTTGAGATCATCAAATATCCAAAACCCCACATTTGTTTCTCCCTATACTGTATTCAAGACTTTACATGTGCCGTCAAA	CATCTCGACATAAGGAGCCTACCATTCTTTTTGTCTTGTTCTTTTGACTAAGGTCTAACACCGGTGGTTTTTCTTCTCATTTTCTTTAGTTTAAAAGGAC
CPSSR_733	CT	1060	6|FCHL5JJBBXX_L2_wHAXPI059581-29_1_(paired)_contig_281572:13-224|+	6|LP150221_R1_(paired)_trimmed_(paired)_contig_86960:124-135|+	8|LP161083-1_R1_(paired)_trimmed_(paired)_contig_152308:127-142|-	N/A	N/A	0.94	0.4	0.99	CTATATTCTCAAAGAGCCTTCTATTTCTAGCTATCCAAATCATCCAAAAAATAGTTTTATAAGTAGTGTAGAGATAGATTATACCCCTTAAACTTTGTCC	TTTACTTGTAAATATCCAAGTAGAAGCAATATAAAATAAAATAGTTGTCATATATCTAAGTGTACTTTTTTAAAGACTGAATGTAAGTGTATTATCCACC
CPSSR_734	CT	1061	6|FCHL5JJBBXX_L2_wHAXPI059581-29_1_(paired)_contig_292655:169-380|+	N/A	N/A	5|FCHL5H3BBXX_L3_wHAXPI062220-17_1_(paired)_contig_138976:688-697|-	5|TCunknown-1_(paired)_contig_54766:676-685|+	0.47	0.4	0.99	TTACTCTGTTCTTCACTCTCCTCACTCCTTTCCTTTCCCCATATAAAACCCCACTCCCTCACCCTCACTAAACTCACTAGTCACCAACCCATCATCTCTA	CAAGCTCTGGCACTCTTTCCTCTCTTTCTCTCTCTAAAACTCCTTTGTTTTTTGACATGGCTCCCTCCAACAATTCCCAAAAAGCCCACAACACCACAAC
CPSSR_735	CT	1062	6|FCHL5JJBBXX_L2_wHAXPI059581-29_1_(paired)_contig_34936:414-625|+	5|LP150221_R1_(paired)_trimmed_(paired)_contig_48738:1417-1426|-	N/A	5|FCHL5H3BBXX_L3_wHAXPI062220-17_1_(paired)_contig_27693:1086-1095|-	5|TCunknown-1_(paired)_contig_6487:1218-1227|-	0.43	0.2	0.99	CATTGGAGAAGCAGTATCTGATGCTGAGCTTCGACCAGGGTATAAATCGCTAACTTGTCCCCTTAGTGTTGTACATACTGAGATTTCATGATCTTATACC	CACATATCTAGTGCACTTGATCGAGCAAAAGCAATGGGTCATGTCCTCTCTTTATCAAAGGACCAGTTATACGATTCTGTTGTAATGGCAAGGAAGTTAA
CPSSR_736	CT	1063	6|FCHL5JJBBXX_L2_wHAXPI059581-29_1_(paired)_contig_35503:341-552|+	6|LP150221_R1_(paired)_trimmed_(paired)_contig_80876:94-105|+	6|LP161083-1_R1_(paired)_trimmed_(paired)_contig_266390:331-342|+	N/A	5|TCunknown-1_(paired)_contig_145913:876-885|-	0.43	0.2	0.98	AATCTGAAGTCTAGTCCCATCCCTCTGGAAGATCCACCAAGCTCTAAAAGCTGTAGACCCTGATGCTCAAAATCTTGTCCTATAATGCAGTAACCTCCTC	CCTAAAAAATCATAAGAGTTCCTCTCTGTGCATAACACCCAACAAAACCACCAAAGGGCCATCACTGCACAACCCCCCCTTTTCGGGATCCTTCAAGACC
CPSSR_737	CT	1064	6|FCHL5JJBBXX_L2_wHAXPI059581-29_1_(paired)_contig_36808:235-446|+	8|LP150221_R1_(paired)_trimmed_(paired)_contig_2729:1167-1182|-	7|LP161083-1_R1_(paired)_trimmed_(paired)_contig_70286:440-453|-	N/A	N/A	0.82	0.4	0.99	TTTTTCCCTTTTCTCTCTTCTTCCTCTTCTTCCTGGTTTCTGCGACACAAGAACAAAACAGCAATTCACAAAAATAAGGTGATAGAGAAGCACTGTTTTA	CATCTGGACTTGAGAAGACATCAATGGAAGTTGTATTGAACGCTGCGATCCCTTCCCGTCCTGGATTTTTTACAAAATTCACTACAAAAACGCAGAAACC
CPSSR_738	CT	1065	6|FCHL5JJBBXX_L2_wHAXPI059581-29_1_(paired)_contig_40965:4667-4878|+	N/A	N/A	8|FCHL5H3BBXX_L3_wHAXPI062220-17_1_(paired)_contig_186617:815-830|-	7|TCunknown-1_(paired)_contig_108870:102-115|-	0.82	0.4	0.99	TTAGATTTTTTCATGATGAGGGAAAAGGCCAAGTGGTGGCCGAGGGCTAAGAATATCGCCGGCAAAAAAGGCCAGAAATCACCATGGATGGAGAGCTTCA	CCCATGGACAAGACTTAGATTCGTTCCAACCAAATTAGGAGTTTGTTTCCCATTAATATGTATGTATCTGAATTAATTAGCACTGTTAATATAGTAGGTA
CPSSR_739	CT	1066	6|FCHL5JJBBXX_L2_wHAXPI059581-29_1_(paired)_contig_43444:228-439|+	5|LP150221_R1_(paired)_trimmed_(paired)_contig_87495:780-789|+	5|LP161083-1_R1_(paired)_trimmed_(paired)_contig_190079:784-793|-	N/A	N/A	0.47	0.4	0.97	TACTCTTATTATTTGCTGCTTCCTCTTTATTACAATTAACCACTTCGTTCCAAGGGGTCTAGCTGCACGAGAACTTGCCTATCATCCGCAATTTAGTAAG	ATCTCCCTATGTTATGTTTATTTTTTACATGTACATAATACATAATGCTAAAACTTTGTGGCAGGAAGATTAGATGAAAACGCAGATAGAATTGATGTCG
CPSSR_740	CT	1067	6|FCHL5JJBBXX_L2_wHAXPI059581-29_1_(paired)_contig_46679:1311-1522|+	3|LP150221_R1_(paired)_trimmed_(paired)_contig_136210:1123-1128|-	N/A	6|FCHL5H3BBXX_L3_wHAXPI062220-17_1_(paired)_contig_74313:129-140|-	N/A	1.41	0.4	0.97	CCATTCTCTTTCTGGTGAATTCTGTGACCCAAAATCATCAGGAAAGATTTTTTGGATGTATATAATAATCCAGTGATCTAGGATGAGATTGAAAATGATA	TTCTCTGTATTAAAAAAGAAGCTTAAAAGTGCTAAACATAATTTAACGAGATGGTATGTCAACATGTTTCCGGCGTCTCACTACAAGTGGTGTATTTTAG
CPSSR_741	CT	1068	6|FCHL5JJBBXX_L2_wHAXPI059581-29_1_(paired)_contig_46789:45-256|+	N/A	N/A	7|FCHL5H3BBXX_L3_wHAXPI062220-17_1_(paired)_contig_72016:152-165|+	7|TCunknown-1_(paired)_contig_16360:274-287|-	0.47	0.4	0.99	TGGCGCGGCTGAGCTCCGGCGGGCTGGATCGGCGGTGGCGCGCTCCGGCGACGGCGGTGGCCCTCCTTCTCTCTCTCTTTCTCTTCCTCTCTCGCGGACA	TGGTGGCTCGCGGATCAGCTGCAAAGGGGGAGTTGGGTGGCTGTTTTTGGTGATGTTGATGATGGATCAAGGTGATGTGGTGATGGGTTAAGGTGGTGGT
CPSSR_742	CT	1069	6|FCHL5JJBBXX_L2_wHAXPI059581-29_1_(paired)_contig_48121:43-254|+	5|LP150221_R1_(paired)_trimmed_(paired)_contig_217286:532-541|-	5|LP161083-1_R1_(paired)_trimmed_(paired)_contig_56639:357-366|-	N/A	N/A	0.47	0.4	0.98	GTATACTAGGGTCTTACTTTTATAAATAAAATAAAATAAAAACATCTCTCTTTGGAGGTCAACTGTTAATGGCTGACAGAATCCACTCATCACATCTTAC	TTCTCTCCCCCAGATTGTAACGCAACTCTAACTTATCACTACTATATAATTACAATTACCCATCGCCTGCAACAAGCCAAACCCAGAAATCTATACCCAT
CPSSR_743	CT	1071	6|FCHL5JJBBXX_L2_wHAXPI059581-29_1_(paired)_contig_526:6404-6615|+	5|LP150221_R1_(paired)_trimmed_(paired)_contig_182369:178-187|-	5|LP161083-1_R1_(paired)_trimmed_(paired)_contig_186374:304-313|-	7|FCHL5H3BBXX_L3_wHAXPI062220-17_1_(paired)_contig_1612:921-934|-	N/A	0.83	0.2	0.97	GAAATTCAATAAATAGAGAATCTTAAAATTAAATACTCGCCTTTTTTGTTTGTTTAAAAAGGTTACAACAAATGATCAAACACAATTGAAGAAGCAATGC	GCTTCACTTGTTCCATTAACAAAATTATGTACCCTGATGGTGGCAATATATCACCAATAGCTGAGAATATGGATTTTTGGTTTGAAATAGTGTAGAAAGA
CPSSR_744	CT	1072	6|FCHL5JJBBXX_L2_wHAXPI059581-29_1_(paired)_contig_53507:99-310|+	N/A	N/A	7|FCHL5H3BBXX_L3_wHAXPI062220-17_1_(paired)_contig_139802:278-291|+	4|TCunknown-1_(paired)_contig_119644:562-569|-	1.25	0.4	0.96	ATCGTCGGCCACCTCCAATTGATCGCCAAGCGATCGTCACTTCATATACTCACATATATTGGGTAAATTAATTAAAGATAGAAGAATTTGTTTCATTCCC	AGAAATGCCTCTCTCCAACTCCATGAATCCCTAGAATTTTCTTTTGAAGGTGGTGAATCCAATTTCTCCATCTTCATTTCAATCGATGGAGGTTAGTTAG
CPSSR_745	CT	1073	6|FCHL5JJBBXX_L2_wHAXPI059581-29_1_(paired)_contig_55151:150-361|+	3|LP150221_R1_(paired)_trimmed_(paired)_contig_82058:218-223|-	3|LP161083-1_R1_(paired)_trimmed_(paired)_contig_56599:850-855|+	3|FCHL5H3BBXX_L3_wHAXPI062220-17_1_(paired)_contig_65689:242-247|+	N/A	1.3	0.2	0.98	CCTTCTTCAGCGCCTCCACAGGCCTGAGCTCTGTTGATCCTCCCATGGCTCTAATCACACCTCCTTCTACCTCAAACAGTGAAGACATATCCATTCCACC	TCTTCTCTCACACATTCAACATCTTAGTTCAATCAGACTTGATGAAACTAACTTTACCTTGTGGGAAACCCAGATCAAAAACCTCTTTCGTCCTGGTGCA
CPSSR_746	CT	1074	6|FCHL5JJBBXX_L2_wHAXPI059581-29_1_(paired)_contig_62990:599-810|+	5|LP150221_R1_(paired)_trimmed_(paired)_contig_63772:1084-1093|-	N/A	N/A	9|TCunknown-1_(paired)_contig_129492:712-729|+	1.7	0.4	0.97	TTTATTGATTCAAAGGGTCATTAGAAGATCATAATTAAGCAAAAGATATCGCAGATTTTTTCAAGTATAGGAGAGCTTGTTGGACTTGGTGCATTCATGA	CATGTTTTCATAACTAATCTATGCAGGAAGAGTGGAGAGTTCAGATGCTGCCAATACAATTTCTATTCGCGACAGTTTGGCCAGTGATAGACATGAGGTT
CPSSR_747	CT	1075	6|FCHL5JJBBXX_L2_wHAXPI059581-29_1_(paired)_contig_6718:67-278|+	6|LP150221_R1_(paired)_trimmed_(paired)_contig_84685:933-944|-	N/A	6|FCHL5H3BBXX_L3_wHAXPI062220-17_1_(paired)_contig_42739:289-300|-	9|TCunknown-1_(paired)_contig_163473:430-447|+	1.3	0.2	0.97	TTCTACAAGACAGCCTCACCAACATCCGCACCGCCACTACCCGTCTCGAGCTCGCCTCTATCTCCCTCCGCGATCTCTCTCTCCGTCCTCAAGGTTCTCC	CCTCTTGTTTTCTCTCTCTTTCTCTCTCTAGACTTTATACATCATTTGTTGGATGGATGTTAGGGAAGAAAATGTTGGTGCCTCTGACTGCGTCGCTTTA
CPSSR_748	CT	1076	6|FCHL5JJBBXX_L2_wHAXPI059581-29_1_(paired)_contig_77331:193-404|+	N/A	6|LP161083-1_R1_(paired)_trimmed_(paired)_contig_188490:95-106|-	7|FCHL5H3BBXX_L3_wHAXPI062220-17_1_(paired)_contig_195050:233-246|-	4|TCunknown-1_(paired)_contig_57719:1932-1939|-	1.09	0.2	0.96	CAGGGAGGCATACGACTTCTTTGGCTGGTATATCTGTTAAGGGTCCATATATACTTGGCTATGATCTCCAATACAATTGTTTTCATTTTTGGAATTCTCC	CAATTCAGGATTGCAAGTAAGGCGGAATGGGGATTGTTGTATGTACTGGCTAGGGACGAGGAAGGTTTCCTGTCGAAAGAAGCTGTGAGGCGCGTCTTTG
CPSSR_749	CT	1077	6|FCHL5JJBBXX_L2_wHAXPI059581-29_1_(paired)_contig_7760:566-777|+	5|LP150221_R1_(paired)_trimmed_(paired)_contig_211436:203-212|-	5|LP161083-1_R1_(paired)_trimmed_(paired)_contig_112643:388-397|+	N/A	N/A	0.47	0.4	0.98	AAACCCCATCATCATCAAACACAATGTGTTTTTTTTACTAAGAAGAAAATCTGATGTGTGACAAATCTCTCTTTTCATCCATCTTTTCTTTCTATGGTAG	ACAAATTACAGTATTTTTTTTACTAAGAAGGACAACCCATGAAAATCTGATTTGAAAAAAATAGGAAGGTTTCACCAAGCTTCAGATTTTCAAGTGAATT
CPSSR_750	CT	1079	6|FCHL5JJBBXX_L2_wHAXPI059581-29_1_(paired)_contig_81868:702-913|+	7|LP150221_R1_(paired)_trimmed_(paired)_contig_197313:311-324|-	7|LP161083-1_R1_(paired)_trimmed_(paired)_contig_181575:762-775|+	N/A	N/A	0.47	0.4	0.99	TTGAAGGCTGAGCCAACACCACTTTATAAGTTTCAGTGGCACCCTGAGTCTAAAGGGTTTATGCATATTATGTGTAAAGCTAGTGGCAAGATTGTAAGTG	CATATATATATTTCTTTACTATATAGACAATAATTCAATCACATGAATTCATGGTGGGATAGACCAGTCTTGAAATCCGATATACGCGATCTGATTGATG
CPSSR_751	CT	1080	6|FCHL5JJBBXX_L2_wHAXPI059581-29_1_(paired)_contig_82912:104-315|+	5|LP150221_R1_(paired)_trimmed_(paired)_contig_23647:1715-1724|+	5|LP161083-1_R1_(paired)_trimmed_(paired)_contig_186150:1469-1478|-	N/A	N/A	0.47	0.4	0.98	ACTTTTATAGACTTCTCATCTACAAATAAGTCAAGGATGTCTCCATCACTTTACCCCAAGATCCGTATAGAGTATAGACTTTCTCCATAAGGTTGACATA	CCACATAAGCTTGACACTCTCCCTCTGTCTCACACACATTTTGGAGGTGAGCGGTTGATATCAGGGTATGAGAAGGATAGTGTGAAAGGAAAATAAAGTG
CPSSR_752	CT	1081	6|FCHL5JJBBXX_L2_wHAXPI059581-29_1_(paired)_contig_90172:181-392|+	5|LP150221_R1_(paired)_trimmed_(paired)_contig_94163:617-626|-	N/A	6|FCHL5H3BBXX_L3_wHAXPI062220-17_1_(paired)_contig_64499:216-227|-	N/A	0.47	0.4	0.96	CATTAAATCGTGTTCATTTTTTCAGAGAAAGTACTGGGTTTTGAAAAAAGAAAAGGCGTTAATACCCACTTTTCTTTTCTGAAATCGATTAATGAAATCA	CACTCATGTTTCTAGGGTGGCGTTATTTCCACGGGCCAAAACGTTGGTTCCACGCCAGGTGTTTTAGGAAATGACAATTCCACCCTTTCTCAAGTAGTAA
CPSSR_753	CT	1084	6|FCHL5JJBBXX_L2_wHAXPI059581-29_1_(paired)_contig_9443:780-991|+	5|LP150221_R1_(paired)_trimmed_(paired)_contig_127561:1923-1932|+	5|LP161083-1_R1_(paired)_trimmed_(paired)_contig_131428:417-426|+	N/A	N/A	0.47	0.4	0.96	ACGATTCGCGAAAAAGCTAAAATCTGTAGAGCGAGATTACCTGAAACAGTGTCATTTTGGTACGTTTGAAATTATAAAACGCAGAAGAGAAACCAGAACC	TGGGTTCGGTCAGTTTTTCCAATCTTCAAGCTCCGACGATTCTAGGGTTCCGATCAACCTCCGACCCAAGCAATTTTCGAAGGTCTCTCTCTATATATAA
CPSSR_754	CT	1086	6|FCHL5JJBBXX_L2_wHAXPI059581-29_1_(paired)_contig_97094:192-403|+	5|LP150221_R1_(paired)_trimmed_(paired)_contig_30319:4300-4309|-	5|LP161083-1_R1_(paired)_trimmed_(paired)_contig_213352:564-573|+	5|FCHL5H3BBXX_L3_wHAXPI062220-17_1_(paired)_contig_48241:769-778|+	N/A	0.43	0.2	0.98	TCAACCATGAAAAGATCTATTTTATAGGCAAGACTAATAGAAATAAAAATGATAGTTTACATTTACAGGAAAAAAAAGCTCTGGAAACAAATAATGCATC	ATACCAATATTTTAAGGAAACATGTGATAATCAAAATTTAGAAGAAAAAAAAGATCAACATAAGTGGAGGTGCATAGAGAGCTGTGACCTTTGAACATTT
CPSSR_755	CT	1087	6|FCHL5JJBBXX_L2_wHAXPI059581-29_1_(paired)_contig_99845:488-699|+	4|LP150221_R1_(paired)_trimmed_(paired)_contig_169816:975-982|-	4|LP161083-1_R1_(paired)_trimmed_(paired)_contig_96355:445-452|-	N/A	N/A	0.94	0.4	0.97	CCAAACAAGCTGCAAAAAAGTGCAGAAAAATTAAGTCATCAATTGTTATGCTTTTTCCAGTTGCCAAGACAAGGAAGAGAGTAGTCATGATTTTATACAA	CCCTCCAAATTAAATTGTAGATGAACACATAAATTCATAAACCTTACCTATAAAGTGGAAATATATTATCCATGTACTGGATGCGAGCCTCGTGCTTATC
CPSSR_756	CT	1088	7|FCHL5JJBBXX_L2_wHAXPI059581-29_1_(paired)_contig_102954:626-839|+	11|LP150221_R1_(paired)_trimmed_(paired)_contig_42404:700-721|+	11|LP161083-1_R1_(paired)_trimmed_(paired)_contig_234152:358-379|-	N/A	N/A	1.89	0.4	0.99	TAGGAAGTTGTATTAGTTGCTTTGTCTTCTGAATGGAAACTAGTATAAATACGGATTTGACTCATGTAATAATAAGGCATGAATGTAATTCATAATTCCA	TCAAATTGTTGATTCAATCTCCATTAGCAACTCAAATCCTAGTTTCTTCAATTGAATTCCTATGTTAGGGTTGATTCCTTACAAAATCTCACCAGGGCTC
CPSSR_757	CT	1090	7|FCHL5JJBBXX_L2_wHAXPI059581-29_1_(paired)_contig_111162:189-402|+	N/A	5|LP161083-1_R1_(paired)_trimmed_(paired)_contig_246151:91-100|+	5|FCHL5H3BBXX_L3_wHAXPI062220-17_1_(paired)_contig_20262:265-274|-	N/A	0.94	0.4	0.96	TTCTGGGGACAAACAATAACAATATTTACTTATTAGCTTTGCCCATGAATCAAAGATGCTGGACAAACTCATGCTTATTTTGCTGTTACCTAATCCTTAC	CATGATAGACTTGACTGTGGTGTAATCAGCTATTCAGTCTTCACCTGCCAGCAGCAGAAGCAGAAGCAGCAGCAGAGTTATGACTGTGACATGCATAAAA
CPSSR_758	CT	1091	7|FCHL5JJBBXX_L2_wHAXPI059581-29_1_(paired)_contig_111767:172-385|+	5|LP150221_R1_(paired)_trimmed_(paired)_contig_112483:2773-2782|-	5|LP161083-1_R1_(paired)_trimmed_(paired)_contig_62405:186-195|+	N/A	N/A	0.94	0.4	0.99	TTAATCATAATTAAAATGTATTATTACTAATAAATTTCTTAACCCTTTCTCTCCCACTTGCTCTACTCATGAATCTTACTTACTCTCACTCCTCCAAACC	AGATTCTCTCTCTAAAACTTGTCGAAGAAGAACTGAGAAAATGGGTTCTGTATCTCTGAAAATAGGAGATGGAACAGCCAGATTCAGAAGAGCAACCGTG
CPSSR_759	CT	1092	7|FCHL5JJBBXX_L2_wHAXPI059581-29_1_(paired)_contig_111976:104-317|+	N/A	8|LP161083-1_R1_(paired)_trimmed_(paired)_contig_196909:209-224|+	8|FCHL5H3BBXX_L3_wHAXPI062220-17_1_(paired)_contig_60506:194-209|-	N/A	0.47	0.4	0.98	ACGAAAAACCAGCTAATACAATGGGATTTAATAGTAACTCTGGCCCAAATGTATCCACACGTAGTAATAGTTGTTTGACCATACCGTTGACTTCATGCAA	CGTTGACTTTCAACAGATGAGGCCTCATAAAGATATGCAATGTCACAATGTAGTTGGGGAGACAACACACAAACCCCATACAGTAATTAATATGAACCAT
CPSSR_760	CT	1095	7|FCHL5JJBBXX_L2_wHAXPI059581-29_1_(paired)_contig_11758:781-994|+	9|LP150221_R1_(paired)_trimmed_(paired)_contig_109403:1057-1074|-	8|LP161083-1_R1_(paired)_trimmed_(paired)_contig_54246:481-496|+	N/A	9|TCunknown-1_(paired)_contig_78849:1066-1083|+	0.83	0.2	0.98	CACAACTAAGGTGAACCTAACCAAGTTTTCACAGATCCTATGTAACATAAGATCTTTTTTGTTCAACTCTACAACTTATCATCGTTGATCCCGTCGCCGC	GTGGGACTCACCTGACACTGTGAGACCTATCTATATTAGAGGTTTTGTTAACCAATTTTGTGCTCAAGGTTTGTGCAAGAAGCAGTACCCTTTGATATAT
CPSSR_761	CT	1102	7|FCHL5JJBBXX_L2_wHAXPI059581-29_1_(paired)_contig_136802:1457-1670|+	11|LP150221_R1_(paired)_trimmed_(paired)_contig_129085:707-728|-	11|LP161083-1_R1_(paired)_trimmed_(paired)_contig_92243:212-233|-	N/A	12|TCunknown-1_(paired)_contig_30039:1677-1700|+	1.92	0.2	1	CATGGACTGTGTGATGAAAACTCTTAAAGCAGGTGGACCCTTCAAGTTCTATACAGGATTTCCTGTATATTGTGTTAGAATTGCACCCCATGTCATGGTA	GTTTTATTGCGATATCTTTATCAGTCCTATCTATTTACAAGATTTCTGCAATCCATGTGCTCAATGCACGGGATGTCAGAAATCTATCTATAATTGTATT
CPSSR_762	CT	1104	7|FCHL5JJBBXX_L2_wHAXPI059581-29_1_(paired)_contig_140261:1087-1300|+	8|LP150221_R1_(paired)_trimmed_(paired)_contig_123272:1692-1707|+	7|LP161083-1_R1_(paired)_trimmed_(paired)_contig_194621:583-596|+	8|FCHL5H3BBXX_L3_wHAXPI062220-17_1_(paired)_contig_88589:379-394|+	8|TCunknown-1_(paired)_contig_30107:972-987|-	0.49	0	1	GAGAACTCTCATTCGGACTGTAAGGATGCCCTTATATGTCAGGTTATTGATGTTTCTGTTGCTTCAAGTTCAGTGCTGTGTAACTCATATTATTTTTGCC	CATAGGAAGGAGGTTCTTATCAACAGCGTGTTCTTATTGAATACCTCAACGGTATTCAATCAAGAGCAGAGGAGATGGTTCAAGTGCTTCAGAACAAGCC
CPSSR_763	CT	1105	7|FCHL5JJBBXX_L2_wHAXPI059581-29_1_(paired)_contig_14087:34-247|+	6|LP150221_R1_(paired)_trimmed_(paired)_contig_75311:734-745|+	6|LP161083-1_R1_(paired)_trimmed_(paired)_contig_204372:288-299|-	8|FCHL5H3BBXX_L3_wHAXPI062220-17_1_(paired)_contig_257432:186-201|+	N/A	0.83	0.2	0.99	AGTAGATGTCAATAGGATTCATCCATGACACAGGAGGCATCAGATGATGCTTTACCCCTAGGACTAGGAGTATAACACTAACTATGATTAGGTGTTAAAA	AAACTCAAGCTAATTAACTCGCCATGGTGAGGTTAATCTTCAGAAGGGCAGGTGATCACCCCCAGCAGAGACAGAGCTGGAAGCTGTGGCGTTGCTGCGC
CPSSR_764	CT	1106	7|FCHL5JJBBXX_L2_wHAXPI059581-29_1_(paired)_contig_157645:22-235|+	8|LP150221_R1_(paired)_trimmed_(paired)_contig_122835:393-408|-	8|LP161083-1_R1_(paired)_trimmed_(paired)_contig_170932:137-152|+	10|FCHL5H3BBXX_L3_wHAXPI062220-17_1_(paired)_contig_94603:615-634|-	10|TCunknown-1_(paired)_contig_52383:2258-2277|+	1.2	0	0.98	TGCAAGCAAGAGTGGTGCACTGCAGCAGTTAATTGAAGCTTCTGTGACTGATGACCACTCCATTTGGAGCAAGGTATGGAGAGGTTCCTTGTTCATTTCA	GTCTATGACCTATGTATATATATATGGTCCAGGAGGTATTGCCATTGTCTTTTTTATTTGTCCTACGGTGGACCTTTGGTGGGTATTGAATGACTCACTA
CPSSR_765	CT	1107	7|FCHL5JJBBXX_L2_wHAXPI059581-29_1_(paired)_contig_157661:16-229|+	6|LP150221_R1_(paired)_trimmed_(paired)_contig_32399:3884-3895|+	6|LP161083-1_R1_(paired)_trimmed_(paired)_contig_102974:629-640|+	7|FCHL5H3BBXX_L3_wHAXPI062220-17_1_(paired)_contig_272357:354-367|-	N/A	0.5	0.2	0.99	GGCATGAACCTCTACTTTAGTTGTGTTAATATTGAAGAATGTGTCGAGCTCCTGTTGTTGGTAAACCTATTCCTTGTGTTACTTCTATGAAAAATCGTGC	CCCTCTCTTCTGCTAATTCGGTTGTCTTTGATATAAATGCTAGGTTGAGTCAAAGAGGAGGAAGAGATGACCTGTTGCATGATACGGAGGTACTCATTTT
CPSSR_766	CT	1108	7|FCHL5JJBBXX_L2_wHAXPI059581-29_1_(paired)_contig_159128:43-256|+	8|LP150221_R1_(paired)_trimmed_(paired)_contig_32589:259-274|-	N/A	N/A	8|TCunknown-1_(paired)_contig_12499:187-202|-	0.47	0.4	0.99	TTTAATCAGATCATTACCCTAAATATCGTCACTCCAGTCCTCTTGAAGTAAGAAAAATGCAAAGAAAAACCAGAAGTCTATCTTCAATCTTCTTCAGCCC	TAGTTGCACCATCAAGCTCCAATGAGGGTTCCAGTCTCATTAATTTTTTACTTAACGTCGTTATTTCGTCTGTCGATGGAGCCTCTTTTATGGGATCGGG
CPSSR_767	CT	1109	7|FCHL5JJBBXX_L2_wHAXPI059581-29_1_(paired)_contig_167746:81-294|+	8|LP150221_R1_(paired)_trimmed_(paired)_contig_187320:205-220|-	8|LP161083-1_R1_(paired)_trimmed_(paired)_contig_244402:195-210|+	N/A	N/A	0.47	0.4	0.98	GACACATTATAGAACTATTAGGTCATACCTAATTATTAAAATTCATTTCCATGTTATACAATTACTTCAATTATTAGAAAATCAACATTGATTTGACAGC	CCATAAAACTATTTGCAGGCTGGATGAGAGAAAGCGTAGAAAGGATTTTATTCTAGAAAGAAATTTGCTGTATCCGAATCCTTTGGAGGAGGACTTGTCG
CPSSR_768	CT	1110	7|FCHL5JJBBXX_L2_wHAXPI059581-29_1_(paired)_contig_175973:331-544|+	N/A	6|LP161083-1_R1_(paired)_trimmed_(paired)_contig_101377:523-534|+	6|FCHL5H3BBXX_L3_wHAXPI062220-17_1_(paired)_contig_158704:332-343|-	N/A	0.47	0.4	1	TCTTATGCTTCAAGATGAATTTCTTTCTTTATTATAACCACCTTCTCTGTTCTGTCTTCTCTTTTCTTATCTCCTCTTCTCCCTCCCTCCCTCTCTCTCG	GATGGGGTTCAATAATTTCCAGCTTGTCAGGAGGCATGCAGCCGAGATTTTCACATCTGTCATTATTTCAACAATATTCTCACTGTATTCAACCGCTCTC
CPSSR_769	CT	1111	7|FCHL5JJBBXX_L2_wHAXPI059581-29_1_(paired)_contig_177827:73-286|+	N/A	N/A	8|FCHL5H3BBXX_L3_wHAXPI062220-17_1_(paired)_contig_22289:484-499|-	6|TCunknown-1_(paired)_contig_120381:676-687|-	0.82	0.4	0.99	TGGGTGGTGAATTGATTCACCAATTTTGATGTGGGGAATGGTAGTTGGTGATTGGTGAAAACTTACAAAAAAAATTAATGACAAAAACGCCCCCGTCTTC	CCAAAGTCTGATCCCTGACTCTCTAAATTGATTCAACTTCCCCATCCTCGCACCCTCTTCGACAGGTCAACATTTCCGGCGAGTCAACAACTGCAGCGGA
CPSSR_770	CT	1112	7|FCHL5JJBBXX_L2_wHAXPI059581-29_1_(paired)_contig_180587:14-227|+	11|LP150221_R1_(paired)_trimmed_(paired)_contig_89395:750-771|-	9|LP161083-1_R1_(paired)_trimmed_(paired)_contig_3635:1711-1728|+	N/A	N/A	1.63	0.4	0.99	TGCAAAACCACACCAACGTTAGCAAGAATTTTCCAATGGAGCCAATATCCCAAATTTGACATTTAGTCATCAATAATTCTTCCGTAATTTGAAAATACAC	AAAATGTGCCACTAAATTTTGATGGAACAACAAATCAGAAAGGAAATGGCGACGGTGATGGAGGATAAGCGACAGCGATGGAGTGAAGCGGCGGTGTTGG
CPSSR_771	CT	1115	7|FCHL5JJBBXX_L2_wHAXPI059581-29_1_(paired)_contig_19044:2441-2654|+	6|LP150221_R1_(paired)_trimmed_(paired)_contig_35003:773-784|+	6|LP161083-1_R1_(paired)_trimmed_(paired)_contig_20928:2538-2549|-	7|FCHL5H3BBXX_L3_wHAXPI062220-17_1_(paired)_contig_263224:129-142|-	N/A	0.5	0.2	0.99	CTTCAAGTGGCCCAAACAATACTTCTCTTGACTCTCAGCCAAATACTCCTACTAGTCCACTCCGCTCTGCTAGCCCAAATGTTAATTCCTCTAGCCCAAA	TCCTCTCTCTCCCACTACTTCATCTCCCTCGTTTGATGTTTCTCCAACCCTAAATCGTCATCCCATGGCTACTCGAGCCAAACATGGCATTCATAAACCC
CPSSR_772	CT	1118	7|FCHL5JJBBXX_L2_wHAXPI059581-29_1_(paired)_contig_205292:40-253|+	6|LP150221_R1_(paired)_trimmed_(paired)_contig_108833:1358-1369|-	5|LP161083-1_R1_(paired)_trimmed_(paired)_contig_1885:527-536|-	4|FCHL5H3BBXX_L3_wHAXPI062220-17_1_(paired)_contig_28867:671-678|-	4|TCunknown-1_(paired)_contig_81034:822-829|+	1.17	0	0.97	CAGCAGCACTAATTCTCATGCTTCTTTTGGAACTGGGTCTGGAGACGTGTATAAGGCATAAACTTCTAGCAACTAAAGGTAATTGCTCATTTTGTTAGAC	CCTCTTGTAGATTTGAGATGCTTCAAGCATTTCTGATTTGTATTGTTATGCTTCTGTTGAATCAATAAGTTTGATTGGACACACTTTGGATGGAATTACA
CPSSR_773	CT	1119	7|FCHL5JJBBXX_L2_wHAXPI059581-29_1_(paired)_contig_212320:158-371|+	9|LP150221_R1_(paired)_trimmed_(paired)_contig_223416:187-204|-	9|LP161083-1_R1_(paired)_trimmed_(paired)_contig_242143:549-566|+	7|FCHL5H3BBXX_L3_wHAXPI062220-17_1_(paired)_contig_149580:1898-1911|-	N/A	1	0.2	0.99	CGGCGCACGATTTCCAGTGCAAGATTAAGAGTGCTATGTGCTCCCGTGTCGCCCACTTCAAAAAACAAGCCGAGTATGCCCTATTATCACTCTCTCTCTC	AGATGTATAATATGCTCTGTAATTCAGTGTTTATATGAACAAATTTGAAGTGTTTTTCTTGTGATTATATAGTTAGGGCAACGTATTCACAGATTTTTTT
CPSSR_774	CT	1120	7|FCHL5JJBBXX_L2_wHAXPI059581-29_1_(paired)_contig_212867:654-867|+	N/A	8|LP161083-1_R1_(paired)_trimmed_(paired)_contig_42748:1239-1254|+	N/A	6|TCunknown-1_(paired)_contig_18516:3251-3262|+	0.82	0.4	0.99	ACATAAAAAACTCACAGGTGGGTGTCACATCTTAATTTAAGTGTGATTGTTATCAAGCAGAAATTTTTAAACTCTTGAGGATATAATTTCTCTTTTTATC	CCTCTTTTATGGTTTACTTTATTCAGTTCCCTGACTTTTCTTCCTTTGAAGGTTCTAGAAGATTGCCCAGGTGATCTTAATTACTGGTATCGTCACATTT
CPSSR_775	CT	1121	7|FCHL5JJBBXX_L2_wHAXPI059581-29_1_(paired)_contig_220258:171-384|+	7|LP150221_R1_(paired)_trimmed_(paired)_contig_12597:1432-1445|-	7|LP161083-1_R1_(paired)_trimmed_(paired)_contig_192222:343-356|-	N/A	5|TCunknown-1_(paired)_contig_76957:382-391|-	0.87	0.2	0.99	CCGATTTCGTCGATACCATGAGCGAGGAAGAGAGAATAACCAGAAGCGGACTCGTACAGTAGATACAACGCCATGGCCGTAAAACCAGCCACAAAAACTA	AAAACTTTCTCTCTCTACAAGTGTGGTGGGTGAGGAGTGAGAAAGATGGAAGCGAAGCTAGGGTTTAGGGTTTTTGATGGAGAGGAAAATGATGACTTGT
CPSSR_776	CT	1122	7|FCHL5JJBBXX_L2_wHAXPI059581-29_1_(paired)_contig_23127:842-1055|+	6|LP150221_R1_(paired)_trimmed_(paired)_contig_96270:115-126|-	6|LP161083-1_R1_(paired)_trimmed_(paired)_contig_12286:661-672|+	6|FCHL5H3BBXX_L3_wHAXPI062220-17_1_(paired)_contig_26222:1353-1364|+	N/A	0.43	0.2	1	AAAAAGTTGAGGTTCAAATAATCAAAAAAGGGTAATATGAAGTCTGAAGGAGAAATGTCGTCAGTTGATTAGGGCTTTCTATCGTGTAGCTTCTCTTCAA	CCCCCCTTTCACCAAAGACTCCATTAAAGAAGAAAAAGAAACTCGAGGACTTCTCTCTCTCACAGTTTGCTGTTTCTATTTTATCAATAAAATCTGTCAA
CPSSR_777	CT	1123	7|FCHL5JJBBXX_L2_wHAXPI059581-29_1_(paired)_contig_239294:233-446|+	6|LP150221_R1_(paired)_trimmed_(paired)_contig_6116:2230-2241|+	7|LP161083-1_R1_(paired)_trimmed_(paired)_contig_14074:452-465|-	10|FCHL5H3BBXX_L3_wHAXPI062220-17_1_(paired)_contig_169727:804-823|-	9|TCunknown-1_(paired)_contig_73027:508-525|+	1.47	0	0.9	GGCCCTGAAGGTGCCAGGAAGAGAAAGAGCAAAATAAGGAGCGGCTGGAGGTCACATATCTGCCCGTCAATGATAATGAGTACTCTCTCTGACTCTCGCG	GACTGCGTGCATATGTGCATGCACATGTATATCAGTTTCCTCATGGGTTTGTATGGTAGTAATCAATAATGAGAGACTCTGTAATTTAGGTATGGAGGAG
CPSSR_778	CT	1124	7|FCHL5JJBBXX_L2_wHAXPI059581-29_1_(paired)_contig_249962:8-221|+	N/A	N/A	9|FCHL5H3BBXX_L3_wHAXPI062220-17_1_(paired)_contig_145502:573-590|+	9|TCunknown-1_(paired)_contig_22898:122-139|+	0.94	0.4	0.99	GACATAACAACGTTGTTGTTGGATCATAAGGCGTTCAAGGACACTGTTGACATCTTTGTTGATCGTTACAGAGACATGAGTATCTCTGTTGTTGCTGGTA	GTCTCTCTCTTAGGACACCATGTTACTGTCTTTTATAGCACAATCAGATATATTGTAGCATAAGTTGCAGTTGGTTATAGTTGTGTAATGCTATTAATTG
CPSSR_779	CT	1125	7|FCHL5JJBBXX_L2_wHAXPI059581-29_1_(paired)_contig_250818:78-291|+	4|LP150221_R1_(paired)_trimmed_(paired)_contig_161867:1273-1280|-	4|LP161083-1_R1_(paired)_trimmed_(paired)_contig_96190:1381-1388|+	N/A	N/A	1.41	0.4	0.98	TCGCCTTGGGTCCTTCTAGGCATACGAGTATGCTGGGATTGGTATCTTACAAGAATGATTTTTCAAGAATGTGATGGTTGTTTTTCATGAAATATTGGCC	ATGTCTCGGTCCTTCTAGGCATACGAGTATGCTGGCTGGTTTTAGTAAGTGGTTCATGACACATGGTTATAGAGATTAGAGAACAAAATCTGGTAGCTCA
CPSSR_780	CT	1126	7|FCHL5JJBBXX_L2_wHAXPI059581-29_1_(paired)_contig_259816:270-483|+	11|LP150221_R1_(paired)_trimmed_(paired)_contig_72419:390-411|+	11|LP161083-1_R1_(paired)_trimmed_(paired)_contig_24586:920-941|+	N/A	N/A	1.89	0.4	0.99	TTTCTCCCATCAATAAAGGCGGGGGAGTGAATGGTCACAAAATTCAATCGAGTTGAACGGACGGTTAAGACACAATCATCATAGATCCTCCATCCATTCC	CCTCATTTCAAAAGCACCCACCTCTCTCTCTCCTCTTTCTCTCTAAAACGAATGCAAAAATAAAGGGACGAATAGCCATAACCAAACCACAACCAACAGA
CPSSR_781	CT	1127	7|FCHL5JJBBXX_L2_wHAXPI059581-29_1_(paired)_contig_266212:338-551|+	10|LP150221_R1_(paired)_trimmed_(paired)_contig_167617:655-674|-	9|LP161083-1_R1_(paired)_trimmed_(paired)_contig_104428:174-191|-	8|FCHL5H3BBXX_L3_wHAXPI062220-17_1_(paired)_contig_23788:766-781|-	N/A	1.12	0.2	0.99	TAGAAACATTCTCATGACTCACCTGATGCGAATATCCTACAAAGACCCATTTTTCCCTATAAATAAGTTGACGTGGCCTGACTTGTTTCTGAACTGAATC	CAAACACACACTCCCACATGAGGGCAAACATTCCATCATACAAAAAGTTGTACACTAGCCTGTACACAAGCAAAATTGTTGGTGCAAGTGTTTGTAATAT
CPSSR_782	CT	1128	7|FCHL5JJBBXX_L2_wHAXPI059581-29_1_(paired)_contig_268748:77-290|+	3|LP150221_R1_(paired)_trimmed_(paired)_contig_88833:321-326|-	N/A	7|FCHL5H3BBXX_L3_wHAXPI062220-17_1_(paired)_contig_8637:377-390|-	N/A	1.89	0.4	0.97	GCTGCTAATACCTCAACTATTGAGGTACTGTCTCTTGCTTTTTTCTATTTGCGTATAAGACCAATTAATGATCCATTTTATCTCTGCATTTACTCACCCA	AAATAATAAAAATTGTATCGAGTCTTAAATGCTGCTTCCTGGATGTGTGAAGTAGATATTGGGCCCCATAGACCTTTGATTTGGATTTAGCGCTCCCAGT
CPSSR_783	CT	1129	7|FCHL5JJBBXX_L2_wHAXPI059581-29_1_(paired)_contig_277710:82-295|+	9|LP150221_R1_(paired)_trimmed_(paired)_contig_146660:1216-1233|+	N/A	N/A	8|TCunknown-1_(paired)_contig_119723:218-233|-	0.82	0.4	0.99	TTTGAGATCTCATTTCTCAACTCTCACTTCACAGTCCAGATTCCAGACAAATCTCTCTCTACTCTCTAGGCTCTGCTCTTCCCATCAGCAGATCGATCCA	AGAATTCTAGAAGTTTTTGGTTTCTCTCTCTAGAAGTTTTTGGTTTCTCGCTGTCTTCTTCACACAAGCAAAAGCTTGAAGAAGTCTGCAAGCAAACAAT
CPSSR_784	CT	1130	7|FCHL5JJBBXX_L2_wHAXPI059581-29_1_(paired)_contig_296812:87-300|+	7|LP150221_R1_(paired)_trimmed_(paired)_contig_213568:247-260|+	8|LP161083-1_R1_(paired)_trimmed_(paired)_contig_209987:372-387|-	8|FCHL5H3BBXX_L3_wHAXPI062220-17_1_(paired)_contig_220546:710-725|+	8|TCunknown-1_(paired)_contig_128230:836-851|-	0.49	0	0.98	ACGGCTCACGTTAGCATCACTCCCTTTTGTTTCTCGGTCCTTCCGTTTCCACCCCCTCTCTCTCTCCTTATCCCTACTACAGATAGACGAATCGCACTTC	CCTCGCCGTCGTTCCCCCAATTCCATTTTCGTTCTCTCCCTATACAATTCCATCTGATTCCGCATCATTCGTGCTTGGAACCTGTCTTTTCGGCTCGAAA
CPSSR_785	CT	1131	7|FCHL5JJBBXX_L2_wHAXPI059581-29_1_(paired)_contig_307201:65-278|+	4|LP150221_R1_(paired)_trimmed_(paired)_contig_88820:309-316|-	4|LP161083-1_R1_(paired)_trimmed_(paired)_contig_22147:116-123|+	7|FCHL5H3BBXX_L3_wHAXPI062220-17_1_(paired)_contig_112674:234-247|-	N/A	1.5	0.2	0.98	AGAGTGCGTGCCTCTTAAGTCTCACAGTGAGACTGTGACTTTTTGAGGTCTGTGAGATAGTTGAATTTACGAAAACTGCCATTGATGGCCCTCCTCTGTC	GTTGCTGTCATGTTGTGTTGAGGTTATGAAGTGGCGGTTACTGTGGAGTTTCCCTTCTCCTCTCTCCAGTTCCATCTCTACGGTTTGTTAGGTTGTGAGA
CPSSR_786	CT	1133	7|FCHL5JJBBXX_L2_wHAXPI059581-29_1_(paired)_contig_33778:468-681|+	9|LP150221_R1_(paired)_trimmed_(paired)_contig_61133:3041-3058|+	N/A	8|FCHL5H3BBXX_L3_wHAXPI062220-17_1_(paired)_contig_18376:177-192|+	N/A	0.82	0.4	1	GAATCCAATCACGCGCTTCTCTTGAAGCACTCCAGTACTCTTGAATATCGAAACAGACACAGTTTGAGCCAGTAGTGTATTTATGTAATATGAATATCAC	GTGATACTTTATTAATTATTATGTTGTGATTTAATTATGAAAGTTGAATTAGCCTTGAAAAGGTGAGAGTGACAAAACTGTAGTGTTCCATAAGAAGACT
CPSSR_787	CT	1134	7|FCHL5JJBBXX_L2_wHAXPI059581-29_1_(paired)_contig_37790:1262-1475|+	N/A	10|LP161083-1_R1_(paired)_trimmed_(paired)_contig_97293:243-262|+	N/A	8|TCunknown-1_(paired)_contig_41157:1360-1375|+	1.25	0.4	0.98	ATGTCACTCAACCTTATATGTGTATTATTTCATTACATTATAGTATGTGTTTTGTAAGCTTTAATAAGAGTGTATCGTATCGTAGTTGTCAAGTAGCTCC	CAACGTTTTTCCAACGATAATTCCTTGCATTAATGATACACGACCTCACGTCACTAAGCCACGGAATCTTGTTTTGCTTAATCAAAATACTAATTATAGC
CPSSR_788	CT	1135	7|FCHL5JJBBXX_L2_wHAXPI059581-29_1_(paired)_contig_42036:1234-1447|+	6|LP150221_R1_(paired)_trimmed_(paired)_contig_32137:602-613|+	7|LP161083-1_R1_(paired)_trimmed_(paired)_contig_239525:168-181|-	7|FCHL5H3BBXX_L3_wHAXPI062220-17_1_(paired)_contig_61599:1178-1191|-	N/A	0.43	0.2	0.98	ATTTCAGAAGCTCGTTTGAGAAGCCAATCCAAACAGACACTAAAGCTTTTCACTCCATGTGTGTTTGTACTAGAGAAATTTGTTTACACTTCTTCGTCAC	CAAATTTTTATTTCATAGCAGGTCTAGAATCAAATTTCAATAGTGAAGGCATAAATTGATTTTTTCCGTGGCATTTTATATTTTATGAGTTCCTCTTTCT
CPSSR_789	CT	1136	7|FCHL5JJBBXX_L2_wHAXPI059581-29_1_(paired)_contig_43494:342-555|+	6|LP150221_R1_(paired)_trimmed_(paired)_contig_117946:780-791|-	5|LP161083-1_R1_(paired)_trimmed_(paired)_contig_75916:135-144|-	7|FCHL5H3BBXX_L3_wHAXPI062220-17_1_(paired)_contig_186734:1450-1463|-	N/A	0.83	0.2	0.99	TTGTTTTCATTGCTTTCACAGGTATTGGTCTTCTTCATTTTAACTTGTTGGCCTGCTGGTAATAAGCATCATATATTTTGCTGCTTCTAAATTTCTTCGC	CACACTCCCTCACACGCTCACACATTATGGCAGTGAGTGCATTATTAGGTGGTGGAACTGGCTCCAAACTCAGAAAGAAGAAAAATCTAGTATATCATCT
CPSSR_790	CT	1139	7|FCHL5JJBBXX_L2_wHAXPI059581-29_1_(paired)_contig_61912:133-346|+	8|LP150221_R1_(paired)_trimmed_(paired)_contig_23771:515-530|-	N/A	N/A	5|TCunknown-1_(paired)_contig_44349:967-976|+	1.25	0.4	0.98	TTTAGAAGGCTCCTTAATAAGACTTAATTATCCTTAAATAGTTCAAAGGTCACCATTTCAACTTATTTATGTTAAGACAATCAATCAACAATCTACCTCC	CCTCTTTCTTTCTCTCTCTTAAAAAAAACTCTACTTTCCATGCAATTCCTGTATTGTTTCCAAAGCGATTCCTTCAACAATTCTTAAACCCCAATTCCCT
CPSSR_791	CT	1140	7|FCHL5JJBBXX_L2_wHAXPI059581-29_1_(paired)_contig_65646:12-225|+	5|LP150221_R1_(paired)_trimmed_(paired)_contig_116720:1558-1567|+	6|LP161083-1_R1_(paired)_trimmed_(paired)_contig_50024:1268-1279|-	N/A	N/A	0.82	0.4	1	TCAAAAACACTCGCAACAGTGATGATACTCTTCTCTCATAAGCACATATGATTAACCTTTGGACGGCTCTAATAGCACAAGAAAACCCAAAGGAACAACA	GAATAAGCTCATTCCTCTCACAAATCTCTCAGATTTAAAACAAACAAATAAATTAAACTCACTTACAAAACCATTGTCTCAAGGACCTACTATCTTATAG
CPSSR_792	CT	1141	7|FCHL5JJBBXX_L2_wHAXPI059581-29_1_(paired)_contig_70451:628-841|+	8|LP150221_R1_(paired)_trimmed_(paired)_contig_221102:227-242|-	8|LP161083-1_R1_(paired)_trimmed_(paired)_contig_105568:2654-2669|-	N/A	7|TCunknown-1_(paired)_contig_23484:692-705|-	0.5	0.2	0.99	CCTGTATATAGAAGAATTGTTGCTACTTTGGAAATTGTTTCCTTGTAACTCTTGTGATATTGGTGTTAATAGCAAGTCATTTATGATTGTTGCCACACAC	CAACATCCAAATAGCATTAATATCATTATATTGGTTGAAGATTGCCTTATTTCAATTCTGTTAACCTGAATATCCAGAGCCCAAGTTGTACATGAGGATC
CPSSR_793	CT	1143	7|FCHL5JJBBXX_L2_wHAXPI059581-29_1_(paired)_contig_76594:22-235|+	6|LP150221_R1_(paired)_trimmed_(paired)_contig_143021:551-562|-	5|LP161083-1_R1_(paired)_trimmed_(paired)_contig_48994:310-319|+	N/A	N/A	0.82	0.4	1	GAAAATTAAGAAGTAAGTTAATTGTAGCCTTATTTGTCCTTCCCCTCTTGTTTATGTTGCTCTGCAACTCTTAGGTTTGTTTTAAAACTAAATCCATTTG	ACCCCCAATCTGCTTTGGTTTGTTCAGGTACTTGGAAAAAAATTCCCAACACTGGCATCCTAACCACAATTTGGTGGTGAAGGAGATTGAGAATGTGAAC
CPSSR_794	CT	1146	7|FCHL5JJBBXX_L2_wHAXPI059581-29_1_(paired)_contig_9230:1225-1438|+	N/A	N/A	7|FCHL5H3BBXX_L3_wHAXPI062220-17_1_(paired)_contig_4792:185-198|-	8|TCunknown-1_(paired)_contig_34570:910-925|-	0.47	0.4	0.99	CTAACCCTAACCCATTCCTTCACCGCCGCCAAATCCATCGACATCTCGTTCTTCTCCAACCCTCAAGCGTGTTATCGACGTTGAAGCTAACAAGCAGGTC	CCCATTTCTGCGTTTTTAGAAGTGAAATTCTGATTCGATTTTAGTGTGAATCATCGTTTTCGAGGATGAGTACGGGAGAGCTTCTCAGCATCGAACCATT
CPSSR_795	CT	1148	8|FCHL5JJBBXX_L2_wHAXPI059581-29_1_(paired)_contig_110244:78-293|+	7|LP150221_R1_(paired)_trimmed_(paired)_contig_69824:457-470|-	N/A	7|FCHL5H3BBXX_L3_wHAXPI062220-17_1_(paired)_contig_305398:523-536|+	N/A	0.47	0.4	0.97	GTGGTACAGATTATCCACTATAGTGTATGTATGGATAGGCGTTTAGTTGTTTTTCGCCATTAATGGCAGTTTGGAGCTTTCTCTCTCTAGAAACTTTTTG	AAAAAGTCTTTTAAAAAGTCAGTGTCTGTAGTTGGACGCTTGTGTGGGGAGTGGGGACTGACGAGTAGTATATTCATGGGGGGTTAGGTGGTTAAGATTG
CPSSR_796	CT	1149	8|FCHL5JJBBXX_L2_wHAXPI059581-29_1_(paired)_contig_125773:102-317|+	N/A	8|LP161083-1_R1_(paired)_trimmed_(paired)_contig_37944:1418-1433|+	9|FCHL5H3BBXX_L3_wHAXPI062220-17_1_(paired)_contig_233559:329-346|-	8|TCunknown-1_(paired)_contig_48641:1070-1085|+	0.43	0.2	1	TCTGAAGGCTTAGATGAAATGAGTCCCCTTGGTGAGATCCATTTACCTTCCTTTCATAGTGAATGTGTTGATTTGAAAGTTATAAGATGTACGATGTGAA	CGTCGTTTGCTGCTAATGTTCAATTTCTCTCATCTTAAGCTGGATTTTTATATTGATAATATGCATGACCTGAGTTCAGGACCTGGGCTTGTGCTTGACG
CPSSR_797	CT	1151	8|FCHL5JJBBXX_L2_wHAXPI059581-29_1_(paired)_contig_151587:67-282|+	N/A	N/A	6|FCHL5H3BBXX_L3_wHAXPI062220-17_1_(paired)_contig_221486:124-135|-	5|TCunknown-1_(paired)_contig_45092:102-111|+	1.25	0.4	0.99	GCACCAGAACACGAGATCCAGCTCTACTCCTCTACAGCAACTCCACTGTAAAGAAACTGAACATCCTCACTTCCCATACCTCTGGAACTGAAAATAAAAC	CCTCGCTTTCTCTCTCTACATTGCTGGAAGTGGAACGAAGACGATGATGATGGGGACTAGTAACAGAGACGAACAAATGACATATATGATAAACACACCA
CPSSR_798	CT	1154	8|FCHL5JJBBXX_L2_wHAXPI059581-29_1_(paired)_contig_201065:104-319|+	6|LP150221_R1_(paired)_trimmed_(paired)_contig_53857:2825-2836|-	N/A	6|FCHL5H3BBXX_L3_wHAXPI062220-17_1_(paired)_contig_318695:152-163|-	7|TCunknown-1_(paired)_contig_82733:317-330|+	0.83	0.2	0.99	TCTCTTAAGGCGTGCCTTTTGCGCCCTCCTCATGGGAGTGAATTGAGAGTCCAGAATTGAAGCTCTTTTGTTTCTCTGTCTCTATCAAAATGCGGAGAAG	CGGAACCTAATCAGATGGTTCACGAGATTGAATGTGGCTCTCTCGCACTGATTCATAGTCTGATCCTAGGTTGACTTGACGACCTCTCTTTCTCTGGATC
CPSSR_799	CT	1155	8|FCHL5JJBBXX_L2_wHAXPI059581-29_1_(paired)_contig_202173:113-328|+	7|LP150221_R1_(paired)_trimmed_(paired)_contig_101798:720-733|+	7|LP161083-1_R1_(paired)_trimmed_(paired)_contig_141362:461-474|-	8|FCHL5H3BBXX_L3_wHAXPI062220-17_1_(paired)_contig_41327:124-139|+	N/A	0.5	0.2	0.98	ATTTTGGAATGAGCTTAACTTTGTCTTTGTTGCATTGAATATCATCACAATTTCTTTCTTATTTGTAAGAGCAACTTGGTAATCAATAATGTTACACCGA	TATAATCTTAAAGTCTTTAGATGATTGCCGAAGTGTAGAAGTATATTTTGCAGCTTTTTTTGTATTAATAATATTGTTTCACTTGATTTTTGTTGACAGT
CPSSR_800	CT	1156	8|FCHL5JJBBXX_L2_wHAXPI059581-29_1_(paired)_contig_232906:407-622|+	6|LP150221_R1_(paired)_trimmed_(paired)_contig_28948:2071-2082|-	N/A	6|FCHL5H3BBXX_L3_wHAXPI062220-17_1_(paired)_contig_49217:736-747|+	N/A	0.94	0.4	0.97	TGGGAAGAGGAATTATATGTTGAGAGCTATCGGTGATCCCAATTACGCCGTTGGCTTCATTGATCGGACGGAATCCGAGTGCTTCGCGTTGCAAGGTCAG	CCCTGTCTGTTTCTGCCTCCTTGGGTCTTTTTTTATTATATTTTATTTGATATGTCTGGAATTTTATATTGACTTTTTTGTATCTCATGACATATTAATT
CPSSR_801	CT	1157	8|FCHL5JJBBXX_L2_wHAXPI059581-29_1_(paired)_contig_246318:888-1103|+	10|LP150221_R1_(paired)_trimmed_(paired)_contig_162399:212-231|+	N/A	N/A	7|TCunknown-1_(paired)_contig_142482:179-192|+	1.25	0.4	0.96	NNNCTCTTTTCTCACGTGCCTCAACCATGCCACCACCGCAACCACGCCTCTATATAAACACCACCACTTCACCACCCTCTCTCTCTCATCCCAATACCAA	ATACCCTCAGAACAATTCCCCACCGTCCGATCCAAATATCAATGGCTCACAACAATCAACACCAAGGTCCCCAACAACTTCAGCAAAAGCCCAAGCTCTC
CPSSR_802	CT	1158	8|FCHL5JJBBXX_L2_wHAXPI059581-29_1_(paired)_contig_246370:352-567|+	9|LP150221_R1_(paired)_trimmed_(paired)_contig_198667:213-230|+	9|LP161083-1_R1_(paired)_trimmed_(paired)_contig_115767:1841-1858|+	N/A	N/A	0.47	0.4	0.99	TTTCTTCTTCTGGTAAAGTAGCAGCATGAAATTTCAACAAAAAAAAAGTAACACAAGTCGATTTGTCAAAGAAAAAGAAAACCCCAAAATCATCTCATCG	AAAATTAGAATTTGTAAGGTTATATTTATGTATTAAGGGATAAGCCCGTGCAAAGCACGGAACAAATAAAAAAATCATATTAATTAAATTCGGCCCGTTT
CPSSR_803	CT	1161	8|FCHL5JJBBXX_L2_wHAXPI059581-29_1_(paired)_contig_258794:130-345|+	10|LP150221_R1_(paired)_trimmed_(paired)_contig_146472:603-622|+	7|LP161083-1_R1_(paired)_trimmed_(paired)_contig_33525:529-542|-	N/A	N/A	1.25	0.4	0.98	TCGCCTGATTTTCTGGGAAAACGAGGGAGGGAAATGGGATGATGGTATTATTATTGCACGATGACGAAAAACTTTGAAACAACTATCTTCTTCTTACACA	CCTCTTTCTCTCTCCTCTCTCTACTCTCTAAAATATTGTGTCTGCCGTCGATTTCCGGCCGTCGGATTTGAGGGTAGTTGATTAGATTTAGGTGGTGACT
CPSSR_804	CT	1168	8|FCHL5JJBBXX_L2_wHAXPI059581-29_1_(paired)_contig_283896:248-463|+	7|LP150221_R1_(paired)_trimmed_(paired)_contig_18452:3790-3803|-	9|LP161083-1_R1_(paired)_trimmed_(paired)_contig_263106:309-326|-	N/A	N/A	0.82	0.4	0.99	TTCTCTGTCTCTCCTCTAGAATCAGATCCGACAGCCACCACCACCACCCGTCATCACCGACGCCATCTCCTCACGTCGGAGAGCTCACCCTGACCGTAGC	TCTCTCGGGCTGGCCCTTTCTCCTCTCGGCAGCTTCATCTTGCCAGCGACAGGACTGACGAGCAGCGGCTTGCTGTTCTTGGAGCAGGGGCGAGTGACAG
CPSSR_805	CT	1169	8|FCHL5JJBBXX_L2_wHAXPI059581-29_1_(paired)_contig_33668:109-324|+	2|LP150221_R1_(paired)_trimmed_(paired)_contig_22159:2616-2619|+	2|LP161083-1_R1_(paired)_trimmed_(paired)_contig_153936:204-207|+	N/A	N/A	2.83	0.4	0.97	AAAGATTGTGCTAGCACACTTACCAACCCCACATTTGCTGACGTCCAAGTGGGCATATAAAACCTTGCAAGTAACTGCAGTGAAGACAATTTATAAGCAC	CCAGAAATCTTCATTTCTCCCCTAGAAACCTATAACGGCCTTTTCATCTGAAAGCTTTAGTACTAAAAACACTACAGATTTTAGCATGCAGAATATGGCA
CPSSR_806	CT	1171	8|FCHL5JJBBXX_L2_wHAXPI059581-29_1_(paired)_contig_37458:96-311|+	6|LP150221_R1_(paired)_trimmed_(paired)_contig_31580:326-337|+	7|LP161083-1_R1_(paired)_trimmed_(paired)_contig_235299:846-859|+	6|FCHL5H3BBXX_L3_wHAXPI062220-17_1_(paired)_contig_25369:763-774|+	N/A	0.83	0.2	0.99	GTCTCAAACTCATCCAATCCCTCTTTACGCAAATCCAACAAAAAGAAAAGAAATAAAAACACACACACTTCACCATTGCACAGAACGTGCTTCTCTCTCC	CCCAATATACCAATTGTAAACCCTAAAAATTATGTGTAATTGATTTGTATGATATGAATTGGTCTATAATTATCTACATTGAAAAAGAAATTCCTAAAAA
CPSSR_807	CT	1172	8|FCHL5JJBBXX_L2_wHAXPI059581-29_1_(paired)_contig_39508:347-562|+	9|LP150221_R1_(paired)_trimmed_(paired)_contig_87040:615-632|+	10|LP161083-1_R1_(paired)_trimmed_(paired)_contig_59792:211-230|+	N/A	N/A	0.82	0.4	0.99	TAGAAATCTTCTCTTCAATTCATCGAGCTCTTCGATTCGATCTCCAATGGCGACCACTGACTCCACTCCTTCTGCTCCAATCGCCACTCCACTTGAAGTA	CATTTGTTGTATTGAGATTTGAATTTTGGTTTTATACAGCTTTTGAACTCACTGTTTGAAACTTGGAATTGTGTAATTGTGTAATTTTTATTGTGATTGT
CPSSR_808	CT	1173	8|FCHL5JJBBXX_L2_wHAXPI059581-29_1_(paired)_contig_40439:655-870|+	8|LP150221_R1_(paired)_trimmed_(paired)_contig_54914:276-291|+	9|LP161083-1_R1_(paired)_trimmed_(paired)_contig_20991:1593-1610|+	7|FCHL5H3BBXX_L3_wHAXPI062220-17_1_(paired)_contig_82231:473-486|+	7|TCunknown-1_(paired)_contig_12056:3120-3133|+	0.75	0	1	ATGGCCAGCATTTAACAATACAAGCCTATTTACAACCACAATTCGTTAATAGTTCAAGTTGTTGAGCTCTGCCCAAGCTTATTATGAAATGCTGAAGAGC	TTTGTCGCGGACACACACAGTTAGATGAGAGTGTTCTTCTACATTTTGCCTGATATCAAGTCAGACAATTTTCCAGAAAAGTTGATTGAAGCTTTCCTGC
CPSSR_809	CT	1175	8|FCHL5JJBBXX_L2_wHAXPI059581-29_1_(paired)_contig_56911:26-241|+	N/A	6|LP161083-1_R1_(paired)_trimmed_(paired)_contig_99599:380-391|+	N/A	6|TCunknown-1_(paired)_contig_127274:1126-1137|+	0.94	0.4	0.98	TGTTTGGTGTTTCCATTGCTTTGCAAATGTGTTTTTCCTTCCAGTTTACAGTGTTGGGGGTTATGTTGATACCAGCATTAAGAAATTGTGGATCTCATAG	ATCCCTTCAACTTTACACTCATATGTATCTTATCTCAAATCTTATTGCCTCTATGAAAGAGATGAGAAACTATTGGGAGGAAGGGCATATGTGCCCTCCC
CPSSR_810	CT	1177	8|FCHL5JJBBXX_L2_wHAXPI059581-29_1_(paired)_contig_6496:177-392|+	5|LP150221_R1_(paired)_trimmed_(paired)_contig_110777:1077-1086|+	5|LP161083-1_R1_(paired)_trimmed_(paired)_contig_32091:890-899|-	N/A	N/A	1.41	0.4	0.94	ACATTATTGCCAGTACTACTTACTACAAGACAGTGTCTTACCAAAGCAGAAAGACGAGAACGACGCCTTGTTTCTTCTTCTTTCCCCCCCTCTCTCTCTC	AGAACCAACCACCTCTGGTTTCTGGTTGCTTTCACTGCAACAAACAAATTTTTGTGTGAGATCTACAGCAAAGGGTTTGCAAGAGACCAGAATCTACACC
CPSSR_811	CT	1178	8|FCHL5JJBBXX_L2_wHAXPI059581-29_1_(paired)_contig_74616:809-1024|+	5|LP150221_R1_(paired)_trimmed_(paired)_contig_120276:1386-1395|-	5|LP161083-1_R1_(paired)_trimmed_(paired)_contig_205722:116-125|-	N/A	N/A	1.41	0.4	0.99	GTTTTGTGGCCTCGTTTAGCTGTTTGGTATGCAGTTGAGCTGCCCATGATGCCTGCTCCAACCACTATTACGTCGTACTGGTTGTCGGAAAATTCCATCC	CCTCTGTTTCTCTCTCTAGAAAGCATACAATATGTGATTGATTAGACAAAGCTAGATGGGATCTGAGGGAGTGATGATGGGTTTGCTTTTAACGTAAGAA
CPSSR_812	CT	1179	8|FCHL5JJBBXX_L2_wHAXPI059581-29_1_(paired)_contig_78357:599-814|+	9|LP150221_R1_(paired)_trimmed_(paired)_contig_102559:1045-1062|-	9|LP161083-1_R1_(paired)_trimmed_(paired)_contig_55767:897-914|+	N/A	N/A	0.47	0.4	0.98	AATTAACATAATTATGTATTGAAATTTATAGATATACTCTCCTCTTTATTAGCTAAATATATCTTACTAGAAGGCATGTCAATTTTGCATTATGCCCAAG	CATGCCGTTCTTCCCTTTTCTTTCAGACCTGTTTAACAACACAACATTGACCACAAAGCTCTTTTACTCCTTCCTCTTCCATGGGCTCAAAGCTCCTCCA
CPSSR_813	CT	1180	8|FCHL5JJBBXX_L2_wHAXPI059581-29_1_(paired)_contig_80869:184-399|+	7|LP150221_R1_(paired)_trimmed_(paired)_contig_180313:984-997|-	7|LP161083-1_R1_(paired)_trimmed_(paired)_contig_240460:255-268|+	N/A	N/A	0.47	0.4	0.99	GTTCCAGCGGCGGTTGAGGCCTGGTATGGCGGCATGGAGCAGCTTTGGCGGCAATCCAAGTGGTGGCAAGCTCTCCTTCTTCCTCTCTCTCCCTCGGATG	TGGATTGCTGAAAACAGCAAAGGGTACAACAGAAATAGCAGCTAATAGGGGCTGTTTTGGGGTCTTTGGTGGTGTAGAAGGTGAGGTGAGGTGGTATAGA
CPSSR_814	CT	1181	8|FCHL5JJBBXX_L2_wHAXPI059581-29_1_(paired)_contig_97165:1072-1287|+	8|LP150221_R1_(paired)_trimmed_(paired)_contig_64247:277-292|+	N/A	6|FCHL5H3BBXX_L3_wHAXPI062220-17_1_(paired)_contig_231235:116-127|+	N/A	0.94	0.4	0.98	AAATGCCAGATACGTTCTCTACGTATTTTTTTGGACAAAAATGCCCTTAAAAAAATTAAAAACTAAAAACTAAAAATGGACCATTGTCTTTCTCTCTCCC	CATCACTACAAGACCCACTTCGTTGAACACCCTCCTTGACCATAACCCATTTCACAATCCAAATCTCATCATCTTTTTCAATTCACCAATATTCATCATC
CPSSR_815	CT	1182	9|FCHL5JJBBXX_L2_wHAXPI059581-29_1_(paired)_contig_113253:243-460|+	N/A	11|LP161083-1_R1_(paired)_trimmed_(paired)_contig_201227:103-124|+	N/A	10|TCunknown-1_(paired)_contig_46094:719-738|-	0.82	0.4	1	ATTATTGGTTGGAACTTTGTTCTTGGGCCTTTAAGAGAAATGATAGTGAAGTCAATATGAGAAGAAAGTGTTTAGACGTTACTTGAAAGCGTTTGTTTAA	CAGTTTTATAGCTAGGTAGGGTTTCACGAACATTCCATTATTTTAGCTTGAGATGCTATGAGTAGTGAGTTTATATTTTTGCAGCCTTATGCAGGAGCCT
CPSSR_816	CT	1183	9|FCHL5JJBBXX_L2_wHAXPI059581-29_1_(paired)_contig_12241:99-316|+	14|LP150221_R1_(paired)_trimmed_(paired)_contig_48496:1422-1449|+	11|LP161083-1_R1_(paired)_trimmed_(paired)_contig_38946:365-386|+	N/A	N/A	2.05	0.4	1	CTCTACAGAATTTCTCTGAAACAAAAGTACATAGCAAATGTTCACAAGCTTCGATCTGTATATCTTAAGCTACGATCTATGAATTTCAAGGTCAGATCTC	CCATCTCTCTTTCTCTCTCTAGATTTCATACATACATGTTAAAGCTAAGTTCTTTTTTCTCGTTTATTTGTTACAGATCTGATGAAAAGCTGAAAATGGG
CPSSR_817	CT	1187	9|FCHL5JJBBXX_L2_wHAXPI059581-29_1_(paired)_contig_159909:105-322|+	7|LP150221_R1_(paired)_trimmed_(paired)_contig_24073:1157-1170|-	7|LP161083-1_R1_(paired)_trimmed_(paired)_contig_80658:1803-1816|-	7|FCHL5H3BBXX_L3_wHAXPI062220-17_1_(paired)_contig_146253:614-627|-	N/A	0.87	0.2	1	GTATTAAAGCTGCATATTCCTTGTAATATCTTCAAGATGAAGAATCTGCCGTTACATTTTATGCTGTATCTGTGTTTTCTTTACACTAGTCTCTTTCTCC	CAGATATTATATAGCATTTGTACAAGAATTTTTCCTAGTAATATGAGATAAAGGACTTACCAAGTTAATGTATTTTATGTCGTATCTACAGATTTTCTTC
CPSSR_818	CT	1192	9|FCHL5JJBBXX_L2_wHAXPI059581-29_1_(paired)_contig_28095:844-1061|+	6|LP150221_R1_(paired)_trimmed_(paired)_contig_184393:538-549|+	6|LP161083-1_R1_(paired)_trimmed_(paired)_contig_227049:91-102|-	6|FCHL5H3BBXX_L3_wHAXPI062220-17_1_(paired)_contig_177502:653-664|+	6|TCunknown-1_(paired)_contig_83191:1198-1209|-	1.2	0	0.98	AACATATAAATTCACATGAACAATCAAACAAACAGACATAGACAAGCTCTCCACTAACATCAAGATCATACAAAGAAATTTCTCCTTTAAATCAAACAAC	TCTTCTCAATCACCTTTTCTTCCTTTATTGAAAAATCAATGGAAATTCACTTCCAACAACAGCAGGAGCAGCAAAAGGCAAGCATTCCAATTAACAAAGC
CPSSR_819	CT	1194	9|FCHL5JJBBXX_L2_wHAXPI059581-29_1_(paired)_contig_79397:369-586|+	13|LP150221_R1_(paired)_trimmed_(paired)_contig_51258:1373-1398|+	20|LP161083-1_R1_(paired)_trimmed_(paired)_contig_128242:306-345|-	N/A	N/A	4.55	0.4	0.94	AAATTCATTCATTGTCCATAGATCCCTTCTAAGACAATGAAAGTGCTAAATCATGTTTATTTAGTAAGTAGGATATTACTCCTAGCTCACTCTCTCTCTC	ATCCAGTGAGTAATACGTTTCAGAAACCTGAAAGCTATATACGTTGTAATTTTGTCTTATCACAGTCACAGCGCGTGGGATGAATACAAACGCCATCATT
CPSSR_820	CT	1195	9|FCHL5JJBBXX_L2_wHAXPI059581-29_1_(paired)_contig_94158:82-299|+	7|LP150221_R1_(paired)_trimmed_(paired)_contig_48616:2564-2577|+	N/A	N/A	14|TCunknown-1_(paired)_contig_83113:356-383|+	2.94	0.4	0.94	TTAAAACCCGTACGGAAGTTTTGAAATTTCTCCCCTGCTCTATTCACCTTCCCGTTAAACCCAGAAGCTTCCCTGCCCTGTTTCTCAAATCTTTCGTTCA	AGACCATGCAACAATGGCGTATCGGCACAAAGAGACAGTGGAAATATGCAGCAAAGAAGAAGGGTTCTTGGGTTCTTACTACAGGGGAGCAATTCTCGCT
CPSSR_821	CT	1196	9|FCHL5JJBBXX_L2_wHAXPI059581-29_1_(paired)_contig_95303:393-610|+	N/A	7|LP161083-1_R1_(paired)_trimmed_(paired)_contig_187399:262-275|+	N/A	9|TCunknown-1_(paired)_contig_13413:1436-1453|+	0.94	0.4	0.99	TGCGTTTATATGGTTTCTGTATGACATCTGGTGAAAGGTTGCTAGTTTATCCTTATATGCCAAATGGAAGTGTTGCCGATCGCTTGAGAGGTTTGTTTTA	GTGTGTGGGCGTGTGTACTCGTAACTTACTTCAGAAAGTAATCTCAATTATGTTGCATTTTAAATGGAAAGGACCTCTATTTCGTTGAACTATTAGCAAG
CPSSR_822	CT	1197	9|FCHL5JJBBXX_L2_wHAXPI059581-29_1_(paired)_contig_99533:75-292|+	7|LP150221_R1_(paired)_trimmed_(paired)_contig_62717:559-572|-	8|LP161083-1_R1_(paired)_trimmed_(paired)_contig_5391:1774-1789|+	N/A	N/A	0.82	0.4	0.99	AACAATCACCCAAACAAACACCCTATTTTGTGTAATGGCGATGACGGCTTCTGTGAAAATCTAAAGCGGGTCGACATCGCCACTCGCCATCTTCTCTCTC	AGAAACGTAATTGCAGAGACAGTCGCCATAGCAATTCAATTACCAGAAAACTCTTGTTCTCTCATTGAAGGGCCTTCCTTCTTCAACTCTTTCCCTCACA
CPSSR_823	CTA	1199	5|FCHL5JJBBXX_L2_wHAXPI059581-29_1_(paired)_contig_164935:154-368|+	4|LP150221_R1_(paired)_trimmed_(paired)_contig_137562:202-213|+	N/A	N/A	4|TCunknown-1_(paired)_contig_108820:974-985|+	0.47	0.4	0.99	TGGATCTATGAAAGGACATGAAGAATCATATAGAGGATAAGAAGAATCATAGACCCATTTTCCTTTGAAAAAATTGCAACCACCACTTGCAAGTTCTCTT	GTTAAATTCTGTGCATTTGTTGTTGTTGTTTGTTGTGAAAAAATAAACAAAGTGAGAAACAATATGGCTTTGAATTTGAAACAAACCATCTTGGATTTTG
CPSSR_824	CTA	1200	6|FCHL5JJBBXX_L2_wHAXPI059581-29_1_(paired)_contig_154686:242-459|+	N/A	3|LP161083-1_R1_(paired)_trimmed_(paired)_contig_22971:1898-1906|+	3|FCHL5H3BBXX_L3_wHAXPI062220-17_1_(paired)_contig_14546:402-410|+	N/A	1.41	0.4	0.96	GATAAAAAGGTTTGTGACAAAAACGCAGAGATTTGCAATAATGGAAATGTGAAGCAGAAATGGAGGATTTCCTTTTACAGATCATCTTCTTCTTCATCAG	CTGTAACAAAACCCCAAAACAAGCAGCCTCCTAAAGAGTTCACCTGTACCATTTCTGGGTCTTTAATGGCTGACCCAGTTATTGTCTCTTCAGGTCACAC
CPSSR_825	CTA	1202	6|FCHL5JJBBXX_L2_wHAXPI059581-29_1_(paired)_contig_95399:205-422|+	4|LP150221_R1_(paired)_trimmed_(paired)_contig_91590:432-443|+	4|LP161083-1_R1_(paired)_trimmed_(paired)_contig_77071:255-266|-	N/A	4|TCunknown-1_(paired)_contig_43249:672-683|-	0.87	0.2	1	TCCTTGCCGGACTGGGCATGGCAAATGCATGGCTATCACGGCGGGGCTACTCCATGTTCACTCTTCTCTACTGCAGCATCATCAGGATTCGCTTCTTCGG	CACAAGCTGCTGTTAGTCAACCTCACAACCCATATACAAAACTCGTCCACAACCGTTACCCTCCATCATTCGCCAACACCACCAACCTATCCCTTCACCA
CPSSR_826	CTA	1203	9|FCHL5JJBBXX_L2_wHAXPI059581-29_1_(paired)_contig_108716:278-504|+	8|LP150221_R1_(paired)_trimmed_(paired)_contig_186788:358-381|+	8|LP161083-1_R1_(paired)_trimmed_(paired)_contig_98548:667-690|+	N/A	N/A	0.47	0.4	0.99	ACTATATATATTTACTTCAACTTGTTTGATCCCAAAATTTGATTTCTTGTTTGAATTTCTTACAGATAAATGCTCCGGCAGACGCCAACATCAGTCTTGC	CATGGAGTCTTTCTCAAAGAGGTGCGTGCATCACTCTTCTTTTTCTTTTTTCCTTTTCCTATTCAGTTTTTCGCCTTACAAAATGTTCAATATAACAACC
CPSSR_827	CTC	1204	5|FCHL5JJBBXX_L2_wHAXPI059581-29_1_(paired)_contig_117180:441-655|+	N/A	4|LP161083-1_R1_(paired)_trimmed_(paired)_contig_202101:210-221|-	4|FCHL5H3BBXX_L3_wHAXPI062220-17_1_(paired)_contig_319211:213-224|-	4|TCunknown-1_(paired)_contig_28998:564-575|+	0.43	0.2	0.99	AAAAGAATCAAAAGACCATCTTCTTCTTCATCTTCTGCTTGTTCTTCTTATTCAGCCAACATTAATGATCCACCACTTCTTCCTCCTTCTTCTTCATCAA	TTACTGCTGCTACCGCAAATCATCACATGAATCCTTTGTTTTATGGGTTACCCAGTAACCCATCTGACCTAAACCATCTTCAATTTTCTGGGTATGATCT
CPSSR_828	CTC	1205	5|FCHL5JJBBXX_L2_wHAXPI059581-29_1_(paired)_contig_124569:1695-1909|+	5|LP150221_R1_(paired)_trimmed_(paired)_contig_90045:792-806|+	5|LP161083-1_R1_(paired)_trimmed_(paired)_contig_22374:312-326|+	N/A	4|TCunknown-1_(paired)_contig_109890:1005-1016|-	0.43	0.2	0.99	TCTAACATCTTGGCAAACACCTTCATTGCTTCATTCAACTTTCCTCCATTACAGTGAGCGTTCATCAGAATATTAAAAGTACACGCATCAGGAACAAATT	CTAAGGAAACTCCATCCAAAATCTCTTTTATCTTATCAAGCTTCCTCGCCTCACAAAGCCCTTGAATAACAGTGTTGTAAGTAATTTTATTGGGTTTAAG
CPSSR_829	CTC	1206	5|FCHL5JJBBXX_L2_wHAXPI059581-29_1_(paired)_contig_222149:120-334|+	5|LP150221_R1_(paired)_trimmed_(paired)_contig_14427:1231-1245|-	5|LP161083-1_R1_(paired)_trimmed_(paired)_contig_169805:707-721|-	5|FCHL5H3BBXX_L3_wHAXPI062220-17_1_(paired)_contig_37415:565-579|-	3|TCunknown-1_(paired)_contig_68637:395-403|+	0.8	0	0.99	TGTAGCGAGTGTTTTTCTTTTTCTTTTTCTGTTCTTTTTTTTGGCAAATTAAAACTAGTGTTGAGAGCCCTCCTTGGATTTCTTGAGGGGAACCACTTGG	CTTTTGATGTAGCTTCATTTCTGGAGGAGTTCAAGGAGAAGGCCCCGTGGTTTTTTCCTTATTCTACATTTTGATGAAGGATTTTCAACGTAAATACTTG
CPSSR_830	CTC	1207	5|FCHL5JJBBXX_L2_wHAXPI059581-29_1_(paired)_contig_27973:337-551|+	5|LP150221_R1_(paired)_trimmed_(paired)_contig_84468:890-904|+	4|LP161083-1_R1_(paired)_trimmed_(paired)_contig_245:359-370|+	N/A	4|TCunknown-1_(paired)_contig_104382:669-680|+	0.5	0.2	0.98	AATGAGTTGACCGTTGGTGATTTCACAACGGCTAGTAATTTAAAAATTGGCGGCGGCAGTGGCGGCGGTGGCGGCGGAGGTGGTGGATCTTCCTCTTCTT	CGACAACGTCGTCATTGGTCAGACATAGTAGCTCACCTGCTGGGTTTCTTAATTATTCCGTTTCTGAAAACGGTACGTTTTAGTTTCCATTTTTTTTGTT
CPSSR_831	CTC	1208	5|FCHL5JJBBXX_L2_wHAXPI059581-29_1_(paired)_contig_39818:1-215|+	6|LP150221_R1_(paired)_trimmed_(paired)_contig_73145:404-421|+	5|LP161083-1_R1_(paired)_trimmed_(paired)_contig_98849:946-960|-	N/A	5|TCunknown-1_(paired)_contig_18419:789-803|-	0.43	0.2	0.99	AACCGATCCTCTACCTACGCCCCTCTACCTGATAGCGCGATGGATAAGAAGAGAACCGCCAATCGGTTCAACACATATGCTTCCTCAAAGAAGGTCTCTA	CTGCTAAGAGGTTGAAGTCCTCCAAAGAGAAGTCGCCTCCTCCTCCACCAAAAACACCATTAGGAGGGCCAATAATCAGGGAGAATCGCCCTCCTCCCCA
CPSSR_832	CTC	1210	6|FCHL5JJBBXX_L2_wHAXPI059581-29_1_(paired)_contig_165676:302-519|+	N/A	4|LP161083-1_R1_(paired)_trimmed_(paired)_contig_80317:2198-2209|+	6|FCHL5H3BBXX_L3_wHAXPI062220-17_1_(paired)_contig_226763:670-687|+	5|TCunknown-1_(paired)_contig_86811:176-190|-	0.83	0.2	0.99	AGCTCCTCATCTGCATCCACCCGTAATTCGAAAGGACCTTCGATTTTAAACGAATCAAGCACAGACATCGATCGAACTCCATTAACCAAAGCTCCAAAAT	CATTCTTCACCTTCTTCCACGAGACCACATCATCGGAAACTCCGAAAATCAAATCGCTTTTCCCAACACGAAGACGAACCTCGTACCTCTTAGACCTCCC
CPSSR_833	CTC	1211	6|FCHL5JJBBXX_L2_wHAXPI059581-29_1_(paired)_contig_172106:362-579|+	7|LP150221_R1_(paired)_trimmed_(paired)_contig_95637:514-534|-	6|LP161083-1_R1_(paired)_trimmed_(paired)_contig_38439:654-671|+	N/A	N/A	0.47	0.4	0.97	TCCCCAACTCCTCCACTGTAATCAACCCATCTCTATCTCCATCAAACACATCAAAAGCTTCCTTCAAATCCATTTCTCCCCCATCATCATCCTCCTGCTG	CACTCCCTTCTCTCTTACTCTGTCTCTCCTCACCATCGACTCGAACAAATCGCAGAACTCATCAAGATCAATCAACCCATCTCCATTAACATCCAACTTC
CPSSR_834	CTC	1212	6|FCHL5JJBBXX_L2_wHAXPI059581-29_1_(paired)_contig_241697:313-530|+	N/A	4|LP161083-1_R1_(paired)_trimmed_(paired)_contig_67471:585-596|+	N/A	4|TCunknown-1_(paired)_contig_79197:369-380|-	0.94	0.4	0.99	GAGGAGGGGGAGGCACGACGTTGTCGGAGATATACCAGAGCTCGAAGAGGTTGTTATTGAGCACAAGAGATGGACTTGAGAGACTCGAACGCCTCGAGTT	AAACGGAATGGATTCTCCCGAAATATCGATTCGTCTCAAGAACGATATCTCTCAGATCCATTCTTTCTGCTACGAGATGGATCGTCTCTGGCGTTCTGTC
CPSSR_835	CTC	1213	6|FCHL5JJBBXX_L2_wHAXPI059581-29_1_(paired)_contig_85190:925-1142|+	3|LP150221_R1_(paired)_trimmed_(paired)_contig_109282:1649-1657|-	3|LP161083-1_R1_(paired)_trimmed_(paired)_contig_129629:116-124|+	N/A	N/A	1.41	0.4	1	AGCGTTTGTTCGCCATCGTCGCTGCTCTTCTTCTATTAGCATATGTATTCTACTGTATCTTCCTGGCTAAGGTATCTACTCTAATCTTAATAATTATCAT	CAAATTTTCTGTTTGGTTCCTGAGAAAATAAAATGCCTTCCACTGTATCTTTCTGGCTAAGTTACGTCCAGTATTTCAATGTTTTATGCTTCTGTTGTGG
CPSSR_836	CTC	1215	8|FCHL5JJBBXX_L2_wHAXPI059581-29_1_(paired)_contig_85805:655-878|+	N/A	N/A	5|FCHL5H3BBXX_L3_wHAXPI062220-17_1_(paired)_contig_109124:505-519|-	4|TCunknown-1_(paired)_contig_26509:537-548|-	1.7	0.4	0.95	GAATCCTGATCAAATAAGAACTGCAGTGAGGTAGATGTTCTCCTTCTCGGAGATGCTTTTGGTATGTTGCTTTCGACACCCATTTTTCTCTATCCTGCTT	TCCTCCTGACAAAAAAAAGTGTCAGATCATGCTTTTCTAAGTACACACAAAGAAAGAATGTTTGAAAGTTTCTTTTTTAACATTTACTACTTGTTGGGTT
CPSSR_837	CTC	1216	9|FCHL5JJBBXX_L2_wHAXPI059581-29_1_(paired)_contig_155308:320-546|+	7|LP150221_R1_(paired)_trimmed_(paired)_contig_219620:166-186|+	6|LP161083-1_R1_(paired)_trimmed_(paired)_contig_208510:207-224|-	5|FCHL5H3BBXX_L3_wHAXPI062220-17_1_(paired)_contig_2544:665-679|+	N/A	1.48	0.2	0.97	TTTTAGCATAGCTTCCATCGTCGTCGCCGCCTTGCATGCACAAATATCTATGCAAGCCTGATCCTAAACCAGCTGATGAGCCTCTTGTCCATGTCTGCCT	TTTCTTCTTCACCTCAGTCTCTCCAAGGCCTCCATATACACTCGTCGATGAGTAGTAACCCATCTGCTCACTCACCACCCCTGTGTTCGCCGTGTTGTTT
CPSSR_838	CTCTTT	1217	5|FCHL5JJBBXX_L2_wHAXPI059581-29_1_(paired)_contig_138000:124-353|+	6|LP150221_R1_(paired)_trimmed_(paired)_contig_53501:748-783|+	5|LP161083-1_R1_(paired)_trimmed_(paired)_contig_65661:620-649|-	N/A	N/A	0.47	0.4	1	TGATAGTCCCCTCTTTCTCTACTACTCCGCCGCCTTTACATGTAGATGATGATGTATCTCTATTAATAATAATATGATCATTTTCCTTTTGTTTAGTCCC	CTCTACTTCTCCTCTATTATTATCTTCATCCTTGCACTCGCTAATACCACCTAATTGCAGTAAGTTGGTGCTGTGACGATCCTTGTCTCTTTCCCCACCG
CPSSR_839	CTG	1219	5|FCHL5JJBBXX_L2_wHAXPI059581-29_1_(paired)_contig_114749:407-621|+	6|LP150221_R1_(paired)_trimmed_(paired)_contig_124252:1661-1678|-	N/A	5|FCHL5H3BBXX_L3_wHAXPI062220-17_1_(paired)_contig_45675:1146-1160|-	4|TCunknown-1_(paired)_contig_48432:1796-1807|+	0.71	0.2	0.99	ACATATGATGATTCTGAATAGCAACCAATAAATCCTTCTCCAATGCAGGTGCAGGAAAATGGGGTTAATGCCTGCACCAGCGCGCAGATTATCGCGCCTA	ATGCTGCAGCTCCTTTTCGATGCCCCTAAACCTTTCTATCAAAGGTTCAGGTCTTTGAACTTATTCTCACTACCTATTATTATATGATGCAAATCAATTG
CPSSR_840	CTG	1220	5|FCHL5JJBBXX_L2_wHAXPI059581-29_1_(paired)_contig_140938:328-542|+	7|LP150221_R1_(paired)_trimmed_(paired)_contig_25898:3527-3547|+	N/A	6|FCHL5H3BBXX_L3_wHAXPI062220-17_1_(paired)_contig_235370:132-149|-	N/A	0.82	0.4	0.99	ACGGCGGCGGCGACAGAGACGATCCCTCGGTCACGGCCGCACGAGACATCGGAATTACGGCGTCGAATTCCATGGAAGAACATTCATCACCATGCTACTA	TCACTGTACCAAAACCCGCCCGAATTCCCATCACCAACCCCCCTCCCTCGTCACTCTTTCTTTCTTTATCACAACCTCCTCCACCCAGATTCCTATGCGT
CPSSR_841	CTG	1222	5|FCHL5JJBBXX_L2_wHAXPI059581-29_1_(paired)_contig_251360:29-243|+	4|LP150221_R1_(paired)_trimmed_(paired)_contig_50643:1325-1336|+	4|LP161083-1_R1_(paired)_trimmed_(paired)_contig_37144:625-636|-	N/A	5|TCunknown-1_(paired)_contig_61762:459-473|-	0.5	0.2	0.99	ACAATGGAAGGTGTCAGAGTTTGCTCAGAGGTTGCTCCTGCGACCCTGGGCAATGCCAGCAGATCTCGGCCATACTAGGCTATAGACATTGAGCCAATCC	CCAAAATTGTACTCGAGGTGGCTGCCAAGCCTATTGCCGAGAGTACCCAATCTTTGGGCCAAGTTGCTCAAACCATGGGCCAAGCTACTCAAAGTGTGGG
CPSSR_842	CTG	1223	6|FCHL5JJBBXX_L2_wHAXPI059581-29_1_(paired)_contig_63534:264-481|+	N/A	4|LP161083-1_R1_(paired)_trimmed_(paired)_contig_228562:357-368|-	4|FCHL5H3BBXX_L3_wHAXPI062220-17_1_(paired)_contig_175507:129-140|+	N/A	0.94	0.4	0.98	AGAAACCTCATTACTGAGGTCCCATGTCGAAGCGGCACATTCTAGGAATGCTGCGAGCCCTCTCCAACATCTCTTGCATCTGCTCACCTCTATACCTACC	CTCCCTCGTCACCTGCTCGACGGCTTGAGATCGACATTGCTCATCAACCTGGGACAATTGTTGGCAGCAACGCTGGAGGGACTGATCCTGTCGGTCAACG
CPSSR_843	CTG	1224	7|FCHL5JJBBXX_L2_wHAXPI059581-29_1_(paired)_contig_38556:1244-1464|+	5|LP150221_R1_(paired)_trimmed_(paired)_contig_160547:1221-1235|+	5|LP161083-1_R1_(paired)_trimmed_(paired)_contig_58855:615-629|+	N/A	5|TCunknown-1_(paired)_contig_18446:1929-1943|+	0.87	0.2	0.99	AGAATTCGGCTAGGGATATAGTTTGTCCCTTTTTCTTCTTCGATTTGGTGGCGACGGCGGCGGTGAGCGACGGAAAGTCGGCGGGTCCGTCGTCTTGTTT	TTGTTGGAGTTCGGCTTCGTTTTCTTCGGCGTCGAGTGCCCATGAACCTACGCTTGGTTTCGCACCCCACGGAGAAGAAGACACTGTTGCCGCCATACTT
CPSSR_844	CTT	1225	10|FCHL5JJBBXX_L2_wHAXPI059581-29_1_(paired)_contig_196625:429-658|+	N/A	6|LP161083-1_R1_(paired)_trimmed_(paired)_contig_245638:128-145|-	N/A	6|TCunknown-1_(paired)_contig_97997:407-424|-	1.89	0.4	0.98	AGGAGCTAGATGGGTATAAGGAACTGCCATAGAGATGGCATGAACTTGTGCTTTCAAGCTCCAACCTTCATTGAATGGCTGAAGCCATCACTACCTTCTC	CATCTTCTTTCCAAGAAACCATTCAATGTCTGCCTCTTTTAAGCAAGCTTACGGAGACGAAACCATTGAAAGAGGAAGATCATGATCATATTGGGCTTAA
CPSSR_845	CTT	1227	5|FCHL5JJBBXX_L2_wHAXPI059581-29_1_(paired)_contig_13061:998-1212|+	5|LP150221_R1_(paired)_trimmed_(paired)_contig_81383:972-986|-	N/A	7|FCHL5H3BBXX_L3_wHAXPI062220-17_1_(paired)_contig_259028:176-196|-	5|TCunknown-1_(paired)_contig_47040:2116-2130|+	0.87	0.2	1	AGGTTCTTCTGGTCATCCTCTGTCCATATGATTGCAGATTTATGTTCACTTTCTTTATCATCATGGGCCTCTTCTTCATCGTCGTCATTATCATCCTCAG	GATTTCCAGCATCTTCATCTGACTTGGCATCACTCTCATCGCTTCTATGAGACCGTTCCGAAGCAGCATCCGAGCCATCATGGGACATATGAGCAGGCTG
CPSSR_846	CTT	1228	5|FCHL5JJBBXX_L2_wHAXPI059581-29_1_(paired)_contig_188533:421-635|+	3|LP150221_R1_(paired)_trimmed_(paired)_contig_95538:2900-2908|-	N/A	N/A	4|TCunknown-1_(paired)_contig_49207:491-502|-	0.82	0.4	0.98	GCTAGCACCGATAAACCTGTTGGAAAGAATTGGGCCATTCTAATTGCTGGCTCAAATGGATATGATAATTATGATTCACAGGTAAATCATATGCCATCTC	TCTTTTTTTCTTTTTTTCTACATTATTTACGTAAACTTGACTCATGTTTAGCTAAAATAAACGATCATATTGATTTTGTTTTTCTCAGGCTAGTGTATGC
CPSSR_847	CTT	1229	5|FCHL5JJBBXX_L2_wHAXPI059581-29_1_(paired)_contig_205448:23-237|+	5|LP150221_R1_(paired)_trimmed_(paired)_contig_15693:158-172|-	6|LP161083-1_R1_(paired)_trimmed_(paired)_contig_137059:220-237|+	N/A	N/A	0.47	0.4	0.98	AGTACGTACATGCATTTAGAATCTGGTAAGAAAGCTGGTAATTTACCCTCACTTTTCTTTTCTGTCTATTGTATATTTGCTCACCAATTGAGTAAATATG	TTTTTTCAATATTTCTTAAGGAAAAAATAAGATGCAAAATTGTGGGCTACTTATATAGACCTTCAATAATAACATACTTTTCTTGTTGGGTGTCAATGAT
CPSSR_848	CTT	1231	5|FCHL5JJBBXX_L2_wHAXPI059581-29_1_(paired)_contig_35933:239-453|+	4|LP150221_R1_(paired)_trimmed_(paired)_contig_35685:1726-1737|-	4|LP161083-1_R1_(paired)_trimmed_(paired)_contig_163955:446-457|+	N/A	N/A	0.47	0.4	0.98	CTCTCTATTATGGGAAAACAAGTGTATTGTAGACACACCTCACTAGTCACTACCTCAGAGGGTAAAATGTAACTGTAAACTTTTCATAAAATTAATGTAA	GTGTGTGTGGCAGGCTGGAGTTATGAAAAGCTACCCTTCAAAGCTTCTTTTCACAACCCTTCAGTGCTTCTTAAGCTCAATTCAGTCATTTATCATTGCC
CPSSR_849	CTT	1232	5|FCHL5JJBBXX_L2_wHAXPI059581-29_1_(paired)_contig_48472:661-875|+	N/A	3|LP161083-1_R1_(paired)_trimmed_(paired)_contig_85971:844-852|+	N/A	3|TCunknown-1_(paired)_contig_47316:843-851|-	0.94	0.4	1	ACTACTTGGTTCCCTACTCTGCAAGATCTCGGCAATTTTCTCTCCCAGACTATGTTCGCTATATTATCTCTGAGTATCGTAAAGTTCTAATTGTAAGTGC	CTCTTTGTTAAATTTGTTCTCCATGCTCAGATGGCTAACCAAAATTGCTCAGCCCAAATATTAGGCCGATAGACAAAATGCCGATATTTTGATGAATATA
CPSSR_850	CTT	1233	5|FCHL5JJBBXX_L2_wHAXPI059581-29_1_(paired)_contig_71637:7-221|+	5|LP150221_R1_(paired)_trimmed_(paired)_contig_137572:446-460|+	5|LP161083-1_R1_(paired)_trimmed_(paired)_contig_7510:906-920|+	4|FCHL5H3BBXX_L3_wHAXPI062220-17_1_(paired)_contig_12151:1555-1566|+	N/A	0.43	0.2	0.97	ATTCTTAGCTGGGGGAGGAATTACAAAGTATCCAAATTTAAAAATGATTTGATGGCTGGTTTAACTCTTGCAAGCCTCTGCATTCCTCAGGTATGCATAG	TTTCTCTTGCTACAGCAAAAAATTGTGATCTTGGTAAATTATAACTCTCTGTCTCTGTCTCTTAAATATGTTGCGTATATTTGCTGCAGAGCATTGGATA
CPSSR_851	CTT	1234	5|FCHL5JJBBXX_L2_wHAXPI059581-29_1_(paired)_contig_89946:167-381|+	6|LP150221_R1_(paired)_trimmed_(paired)_contig_76265:220-237|-	6|LP161083-1_R1_(paired)_trimmed_(paired)_contig_44516:192-209|-	N/A	N/A	0.47	0.4	0.96	TTGGTCGAGTGTGCTGCCCGTGCATGGAAACGGAAGAGGCCAGCAATTGCAATGGATGACATTTCAGCTGTCTGCCTATTCTTTCATGCTTCTTCTTCTC	TAACTCAGCAGGTTCAGTCTGCTACTACTGTGGTAAAATAGCAATGTAAACAAGCCTCTTCCATTTTGTTATATATAATCTTTCATTTAGTTTAGTTGAT
CPSSR_852	CTT	1235	6|FCHL5JJBBXX_L2_wHAXPI059581-29_1_(paired)_contig_146663:287-504|+	N/A	6|LP161083-1_R1_(paired)_trimmed_(paired)_contig_126087:706-723|-	7|FCHL5H3BBXX_L3_wHAXPI062220-17_1_(paired)_contig_46557:533-553|-	5|TCunknown-1_(paired)_contig_130765:777-791|-	0.71	0.2	1	AAATCGGCCTAGAACATCGGGGCCTAGGTGGCTTCTTGGCAGAAATCGGCCATGTTTTTAATCTGGTGCTAGGCTGACTAGGCAGCGTTATGCATTGATA	TGTAAAACTGACTCTTCTGTCCAAATAATCTAGTACTCAAAGCACAGCAAGAATTGAAGAGCTGCTGCAGGAGGATCAGAATGTGAAGCGTAGGAGGGAG
CPSSR_853	CTT	1236	6|FCHL5JJBBXX_L2_wHAXPI059581-29_1_(paired)_contig_194116:242-459|+	4|LP150221_R1_(paired)_trimmed_(paired)_contig_114290:579-590|+	N/A	N/A	4|TCunknown-1_(paired)_contig_74038:1173-1184|+	0.94	0.4	0.98	TCACCAAATTCGATGCCGCCATTGTAGACTTGCTACTAGTTTTCCATCTGATATTCACAAACTGAGAAAGTGGGTTTGTTGTGTAGGAGAAGTTGTGCTG	TAGAGTAAAGAAGGAGAAGAAAGAATTAGGGTTTGTTTGGGTGAGAAATCTAGAGGGGTTAACAGAAGCAGAAACAGAAACAGCAGAGGCTGATAGAGTG
CPSSR_854	CTT	1237	6|FCHL5JJBBXX_L2_wHAXPI059581-29_1_(paired)_contig_206557:92-309|+	5|LP150221_R1_(paired)_trimmed_(paired)_contig_90426:866-880|+	5|LP161083-1_R1_(paired)_trimmed_(paired)_contig_214484:110-124|-	N/A	N/A	0.47	0.4	0.99	GATCGGAGGCGAGGAATCGGCACAAATCAGAGACCTTTCTTCCCTCCTTCTCCTCCTTCCTTTTTCTTTCTTCCCCTTTTCTTCTTTTTCTTCTTCTTCC	CCCCTGTTCTGCCGCGCGCTGGGAATGTGGAGGAGGCTGCCGCGGGTCTTGGTGGGGTGTTGGGCGGCTGTGAGGGGGTGTTGGGTGGTGGTTGGAGGTG
CPSSR_855	CTT	1238	6|FCHL5JJBBXX_L2_wHAXPI059581-29_1_(paired)_contig_313710:45-262|+	5|LP150221_R1_(paired)_trimmed_(paired)_contig_210100:446-460|-	N/A	6|FCHL5H3BBXX_L3_wHAXPI062220-17_1_(paired)_contig_222798:352-369|-	N/A	0.47	0.4	0.99	CCTTGGAGGTGACCCGGCTGGTATATTGGCACACCATAGTTTGATTTAAAACTAATCCGATACTACTCGAACGCGCATTTGGAATAATCGTCCCCATTAC	GTATCAGAAATCCAGAAAACACAAAACAAAAAATAATCACGTACTGGAGTAATTTTTTTAGAAAAATTAAGCAAAATAATTAGAGGATTATTAATTAATT
CPSSR_856	CTT	1239	6|FCHL5JJBBXX_L2_wHAXPI059581-29_1_(paired)_contig_34677:399-616|+	4|LP150221_R1_(paired)_trimmed_(paired)_contig_211814:450-461|-	4|LP161083-1_R1_(paired)_trimmed_(paired)_contig_95883:478-489|+	N/A	N/A	0.94	0.4	0.97	AGTTTGACAAGTATTCGTATGTAATCTTCCAATATTACCCATTCCCGATGCAGGTCTCTTTGTTCGCAAAGATCCTGTAGCTGTCCTAGGCAATGCAACA	CAATGAATTTTGATTTCATGGAAGCAATCGTGATCATGGTGTTTCTATCTTTCCATTCTTCAATTGATTGCCTCAGAGTTTTGTTTGGTCGTAGTATTGA
CPSSR_857	CTT	1240	6|FCHL5JJBBXX_L2_wHAXPI059581-29_1_(paired)_contig_63489:82-299|+	6|LP150221_R1_(paired)_trimmed_(paired)_contig_76677:902-919|+	N/A	7|FCHL5H3BBXX_L3_wHAXPI062220-17_1_(paired)_contig_196070:94-114|+	7|TCunknown-1_(paired)_contig_101617:1004-1024|-	0.5	0.2	0.99	GCAGCCATTCAAAATATGGATCATCAAGCCACTCAGGTAGGCAAAGTCCATGATCTATGGGAACAAGCTCCTCAGCCACCCCAACATCATCATCAATATA	AACTAGTATATTCCCTGCATGCCTGTCAAGATTAAGAAGTCTTACATCAAGAATCCCAATGCGATGAACTGAACCAACTGAGAATCCAGAAGGGCCCAAC
CPSSR_858	CTT	1241	6|FCHL5JJBBXX_L2_wHAXPI059581-29_1_(paired)_contig_76658:1726-1943|+	5|LP150221_R1_(paired)_trimmed_(paired)_contig_24060:2721-2735|-	5|LP161083-1_R1_(paired)_trimmed_(paired)_contig_224880:398-412|+	6|FCHL5H3BBXX_L3_wHAXPI062220-17_1_(paired)_contig_127677:575-592|-	6|TCunknown-1_(paired)_contig_54829:318-335|+	0.49	0	0.99	ATTCCTTGTCCCCGCACTCTCTCCTATTCGCGAACCCGCATTTCTTACCGTTGCAGTACGTCCTCCAAATCCCCTCTTCCAGCAGCCTCTTCCCCACAAC	CTCTTCCTTTCTCTCTCCTTCTCCTTCTTTGTCGCATTCCAGTGCGATTCGGACCAACCCAGATGCCATTTCCTTCACCAACCCGCTGATCGGCGTCGCC
[truncated: 942 more rows]

## Sheet: Sheet2
CPSSRID	Forward primer1 (5'->3')	Tm (centigrade)	Size (bp)	Average identity (%)	Average coverage (%)	Reverse primer1 (5'->3')	Tm (centigrade)	Size (bp)	Average identity (%)	Average coverage (%)	Product1 size (bp)	Start	End	Forward primer2 (5'->3')	Tm (centigrade)	Size (bp)	Average identity (%)	Average coverage (%)	Reverse primer2 (5'->3')	Tm (centigrade)	Size (bp)	Average identity (%)	Average coverage (%)	Product2 size (bp)	Start	End	Forward primer3 (5'->3')	Tm (centigrade)	Size (bp)	Average identity (%)	Average coverage (%)	Reverse primer3 (5'->3')	Tm (centigrade)	Size (bp)	Average identity (%)	Average coverage (%)	Product3 size (bp)	Start	End
[truncated: 1,800 more rows]
